# Supplementary material for: Surfaceome Profiling of Rhabdomyosarcoma Reveals B7-H3 as a Mediator of Immune Evasion
Source: Cancers (Basel). 2021 Sep 9;13(18):4528. doi: 10.3390/cancers13184528 (PMC8466404; doi:10.3390/cancers13184528)
Supplement: Supplementary file 1 [file cancers-13-04528-s001.zip › Supplementary Tables.xlsx]

## Sheet: Table of contents
Table S1. Normalized protein abundance (expressed in NSAF values) in RMS and normal muscle cell lines
Table S2. List of proteins identified as cell-surface proteins (GO:00005886)
Table S3. List of cell-surface proteins upregulated by 2-fold in RMS compared to normal muscle
Table S4. List of cell-surface proteins upregulated by 2-fold in fusion-negative RMS compared to normal muscle
Table S5. List of cell-surface proteins upregulated by 2-fold in fusion-positive RMS compared to normal muscle
Table S6. List of cell-surface proteins from Table S4 upregulated by 2-fold in RMS at the RNA level
Table S7. List of cell-surface proteins from Table S5 upregulated by 2-fold in fusion-negative RMS at the RNA level
Table S8. List of cell-surface proteins from Table S6 upregulated by 2-fold in fusion-positive RMS at the RNA level
Table S9. Normal tissue median RNA expression of RMS-enriched cell-surface proteins
Table S10. Normal tissue median protein expression of RMS-enriched cell-surface proteins
Table S11. B7-H3 tissue expression in RMS specimens and association with clinicopathological features
Table S12. Correlation analysis of B7-H3 expression with immune cell abundance in RMS tumors

## Sheet: Table S1
Table S1. Normalized protein abundance (expressed in NSAF values) in RMS and normal muscle cell lines
Entry ID	Entry	Gene names	Gene	Normal Muscle		Fusion Negative			Fusion Positive
				hSkMC 1	hSkMC 2	RD	RMS-MC02	Rh36	RH30	Rh41
A2MG_HUMAN	P01023	A2M CPAMD5 FWP007	A2M	9.93715e-05	0.000147013	0.000372377	8.80981e-05	9.2364e-06	2.1265e-05	2.82868e-05
A2ML1_HUMAN	A8K2U0	A2ML1 CPAMD9	A2ML1	2.19684e-05	0	0	0	0	0	0
AAK1_HUMAN	Q2M2I8	AAK1 KIAA1048	AAK1	2.81987e-05	0	0	0	0	0	0
AAMDC_HUMAN	Q9H7C9	AAMDC C11orf67 PTD015	AAMDC	0	0	0	0.000248961	0	0	0
AAMP_HUMAN	Q13685	AAMP	AAMP	0	0	0	0	0.000144147	0	0.000122626
SYAC_HUMAN	P49588	AARS1 AARS	AARS1	7.95387e-05	0	0	3.02475e-05	9.14577e-05	0	3.23183e-05
SYAM_HUMAN	Q5JTZ9	AARS2 AARSL KIAA1270	AARS2	1.64449e-05	0	0	6.04951e-05	0	0	0
AASD1_HUMAN	Q9BTE6	AARSD1	AARSD1	0	0	0	0	5.01845e-05	0	0
ADPPT_HUMAN	Q9NRN7	AASDHPPT CGI-80 HAH-P HSPC223 x0005	AASDHPPT	4.88778e-05	0	0	0	0.000146371	0.000169862	0.000160095
GABT_HUMAN	P80404	ABAT GABAT	ABAT	0	0	0.000118496	0.000144486	0	7.27979e-05	0.000102918
ABCA1_HUMAN	O95477	ABCA1 ABC1 CERP	ABCA1	2.78497e-05	0	0	6.85729e-05	0	0	0
ABCAD_HUMAN	Q86UQ4	ABCA13	ABCA13	7.12801e-06	0	1.80681e-05	7.3343e-06	0	1.41551e-05	0
ABCA2_HUMAN	Q9BZC7	ABCA2 ABC2 KIAA1062	ABCA2	4.34469e-06	0	0	0	0	0	0
ABCA8_HUMAN	O94911	ABCA8 KIAA0822	ABCA8	9.83017e-06	0	0	0	0	0	0
ABCBB_HUMAN	O95342	ABCB11 BSEP	ABCB11	0	0	0	0	0	2.79225e-05	0
MRP1_HUMAN	P33527	ABCC1 MRP MRP1	ABCC1	4.94804e-05	0	0	0.000103492	0	0	0
MRP4_HUMAN	O15439	ABCC4 MRP4	ABCC4	1.56409e-05	0	0	2.15766e-05	0	0	0
ABCE1_HUMAN	P61221	ABCE1 RLI RNASEL1 RNASELI RNS4I OK/SW-cl.40	ABCE1	0.000149218	0.000112945	3.30138e-05	0.000120764	0.000202236	0.000486768	0.000103226
ABCF1_HUMAN	Q8NE71	ABCF1 ABC50	ABCF1	6.10972e-05	0	0	3.37134e-05	8.62545e-05	0	2.40143e-05
ABCF2_HUMAN	Q9UG63	ABCF2 HUSSY-18	ABCF2	4.14299e-05	0	0	0	0	0	0
ABCF3_HUMAN	Q9NUQ8	ABCF3	ABCF3	2.1995e-05	0	0	0	0	0	0
ABHDA_HUMAN	Q9NUJ1	ABHD10	ABHD10	0.000155606	0	0.000248714	0	0.000199262	0.000143943	0
ABHDB_HUMAN	Q8NFV4	ABHD11 WBSCR21 PP1226	ABHD11	5.02743e-05	0	0	0	0	0	0
ABD12_HUMAN	Q8N2K0	ABHD12 C20orf22	ABHD12	7.18186e-05	0	0	7.19219e-05	0	0	0
ABHEB_HUMAN	Q96IU4	ABHD14B CIB	ABHD14B	7.99818e-05	0	0	0	0	0	0
ABI1_HUMAN	Q8IZP0	ABI1 SSH3BP1	ABI1	3.74322e-05	0	0	0	4.106e-05	7.41215e-05	0
ABI2_HUMAN	Q9NYB9	ABI2 ARGBPIA	ABI2	0	0	0	0	5.37691e-05	0	0
ABLM1_HUMAN	O14639	ABLIM1 ABLIM KIAA0059 LIMAB1	ABLIM1	0	0	0.000175949	0	0.000153975	0	5.23948e-05
ABRX2_HUMAN	Q15018	ABRAXAS2 ABRO1 FAM175B KIAA0157	ABRAXAS2	0	0	0	0	3.20326e-05	0	0
THIK_HUMAN	P09110	ACAA1 ACAA PTHIO	ACAA1	0.000166763	0.000257976	0.000251355	0.000367783	3.42167e-05	6.49024e-05	0
THIM_HUMAN	P42765	ACAA2	ACAA2	0.000531516	0	0.000278784	0.000231178	0.00017923	0.000179592	0.000219559
ACACA_HUMAN	Q13085	ACACA ACAC ACC1 ACCA	ACACA	0	0	0	0	1.41498e-05	0	0
ACACB_HUMAN	O00763	ACACB ACC2 ACCB	ACACB	4.2349e-06	0	3.0057e-05	0	0	0	0
ACD10_HUMAN	Q6JQN1	ACAD10	ACAD10	0	2.11969e-05	0	0	0	0	0
ACAD9_HUMAN	Q9H845	ACAD9	ACAD9	7.65899e-05	0	6.03317e-05	0.000187622	2.18193e-05	0	0
ACADM_HUMAN	P11310	ACADM	ACADM	0.000149753	0	0.000181309	0.000241015	0	8.67379e-05	0
ACDSB_HUMAN	P45954	ACADSB	ACADSB	2.49589e-05	0	0	0.000103292	0	0	0
ACADV_HUMAN	P49748	ACADVL VLCAD	ACADVL	0.000587335	0.000792765	0.000199801	0.000526847	0.000118292	0	3.29339e-05
ACAP1_HUMAN	Q15027	ACAP1 CENTB1 KIAA0050	ACAP1	0	0	0	0	0	0	2.81143e-05
THIL_HUMAN	P24752	ACAT1 ACAT MAT	ACAT1	0.00035251	5.60541e-05	0.000281875	0.000719219	0.00018401	0.000135889	5.12305e-05
THIC_HUMAN	Q9BWD1	ACAT2 ACTL	ACAT2	0	0	0.000269747	7.89387e-05	0.000275403	0.000248578	0.000281143
GCP60_HUMAN	Q9H3P7	ACBD3 GCP60 GOCAP1 GOLPH1	ACBD3	0.000129952	8.27027e-05	3.62611e-05	0.000238757	2.46809e-05	0	3.7793e-05
ACBD5_HUMAN	Q5T8D3	ACBD5 KIAA1996	ACBD5	1.95511e-05	4.20405e-05	3.68655e-05	8.09122e-05	0	0	0
ACE_HUMAN	P12821	ACE DCP DCP1	ACE	3.9299e-05	0	0	0	0	0	0
ACINU_HUMAN	Q9UKV3	ACIN1 ACINUS KIAA0670	ACIN1	1.92939e-05	4.97849e-05	0.000305595	4.16897e-05	0	0	0
ACLY_HUMAN	P53396	ACLY	ACLY	0.000330037	0.000156349	5.32236e-05	0.000374261	0.000323503	0.000269533	0.000238158
ACOC_HUMAN	P21399	ACO1 IREB1	ACO1	0.000110783	0	0	0.000115589	0.000138263	0	0
ACON_HUMAN	Q99798	ACO2	ACO2	0.000189969	0	6.19865e-05	0.000685374	0.000194834	0	6.78051e-05
ACOT1_HUMAN	Q86TX2	ACOT1 CTE1	ACOT1	3.82522e-05	0	0	0.000351792	0	0	0
ACO13_HUMAN	Q9NPJ3	ACOT13 THEM2 HT012 PNAS-27	ACOT13	0.000195511	0	0.000212494	0.000323649	0.000150553	0	0
BACH_HUMAN	O00154	ACOT7 BACH	ACOT7	0.000125686	0	5.26649e-05	0.000385296	0.000376383	0	0
ACOT8_HUMAN	O14734	ACOT8 ACTEIII PTE1	ACOT8	8.17089e-05	0	0	0	4.18204e-05	0	0
ACOT9_HUMAN	Q9Y305	ACOT9 CGI-16	ACOT9	0.000141004	0	4.42385e-05	0	0	0	0
ACOX1_HUMAN	Q15067	ACOX1 ACOX	ACOX1	0.000130941	0.000511304	0.000290974	9.32289e-05	4.06901e-05	3.85906e-05	9.34611e-05
ACOX2_HUMAN	Q99424	ACOX2	ACOX2	4.57039e-05	0	0	0	0	0	0
ACOX3_HUMAN	O15254	ACOX3 BRCOX PRCOX	ACOX3	5.26376e-05	3.23389e-05	0.000311938	0.000112362	0	0	0
PPAC_HUMAN	P24666	ACP1	ACP1	0.000196003	0	0.000296339	8.99024e-05	0.000250922	0.000305807	0.000192114
PPAL_HUMAN	P11117	ACP2	ACP2	6.12202e-05	0	0	0.000269707	7.84132e-05	0	0
PPA6_HUMAN	Q9NPH0	ACP6 ACPL1 LPAP UNQ205/PRO231	ACP6	0	0	0	9.90761e-05	0	0	0
ACSF2_HUMAN	Q96CM8	ACSF2 UNQ493/PRO1009	ACSF2	7.76294e-05	0	0	0	0	0	0
ACSF3_HUMAN	Q4G176	ACSF3 PSEC0197	ACSF3	1.83292e-05	0	0	0	0	0	0
ACSL1_HUMAN	P33121	ACSL1 FACL1 FACL2 LACS LACS1 LACS2	ACSL1	6.76769e-05	0	0	0.000103734	0	0	0
ACSL3_HUMAN	O95573	ACSL3 ACS3 FACL3 LACS3	ACSL3	0.000128452	0	0.000148808	0.000161824	0.000150553	5.09585e-05	2.88172e-05
ACSL4_HUMAN	O60488	ACSL4 ACS4 FACL4 LACS4	ACSL4	0.000159738	0	0	0.00010242	0	0	0
ACS2L_HUMAN	Q9NUB1	ACSS1 ACAS2L KIAA1846	ACSS1	0	0	0	0	9.0332e-05	0	0
ACTS_HUMAN	P68133	ACTA1 ACTA	ACTA1	0.0041181	0.00459443	0.00594698	0.00578362	0.00310068	0.00558117	0.00441863
ACTA_HUMAN	P62736	ACTA2 ACTSA ACTVS GIG46	ACTA2	0.00404115	0.00459443	0.00579831	0.00568304	0.00308276	0.00572677	0.0043363
ACTB_HUMAN	P60709	ACTB	ACTB	0.00742201	0.00672649	0.00656839	0.00668823	0.00595044	0.00733061	0.00655934
ACTBL_HUMAN	Q562R1	ACTBL2	ACTBL2	0.00200256	0.00204197	0.00204905	0.00196687	0.00146969	0.00238852	0.0018937
ACTC_HUMAN	P68032	ACTC1 ACTC	ACTC1	0.00410414	0.0047746	0.00486943	0.00277413	0.00322614	0.00522368	0.00444608
ACTG_HUMAN	P63261	ACTG1 ACTG	ACTG1	0.00755531	0.0068466	0.00661795	0.00678882	0.0049826	0.00737915	0.00590066
ACTH_HUMAN	P63267	ACTG2 ACTA3 ACTL3 ACTSG	ACTG2	0	0	0.00368655	0.00277413	0	0.00455553	0
ACL6A_HUMAN	O96019	ACTL6A BAF53 BAF53A INO80K	ACTL6A	3.74383e-05	5.36688e-05	0.000137023	6.88614e-05	8.00816e-05	6.07597e-05	7.35757e-05
ACTN1_HUMAN	P12814	ACTN1	ACTN1	0.00130181	0.00204488	0.000884818	0.00215337	0.000972019	0.000399762	0.00105197
ACTN2_HUMAN	P35609	ACTN2	ACTN2	0.000287627	0.00087315	0.000740514	0.000934277	0.00158515	0	0.000543093
ACTN3_HUMAN	Q08043	ACTN3	ACTN3	0	0	0.000340403	0.000188533	0.000431197	2.77253e-05	0
ACTN4_HUMAN	O43707	ACTN4	ACTN4	0.00121828	0.00192185	0.00120931	0.00187289	0.00118292	0.000415453	0.00140518
ARP10_HUMAN	Q9NZ32	ACTR10 ACTR11 ARP11	ACTR10	6.37536e-05	0	0	0	6.5458e-05	0	0
ACTZ_HUMAN	P61163	ACTR1A CTRN1	ACTR1A	0.000191308	0.000205314	0.000151286	7.52672e-05	0.000262593	0.000426629	5.36133e-05
ARP2_HUMAN	P61160	ACTR2 ARP2	ACTR2	0.00100762	0.001037	0.00065336	0.000577278	0.00018401	9.05929e-05	0.000384229
ARP3_HUMAN	P61158	ACTR3 ARP3	ACTR3	0.00120242	0.00161006	0.000936948	0.00100213	0.00030431	0.000138802	0.000588606
ACVR1_HUMAN	Q04771	ACVR1 ACVRLK2	ACVR1	6.2051e-05	6.63798e-05	7.30331e-05	0	0	0	0
ACY1_HUMAN	Q03154	ACY1	ACY1	3.82522e-05	0	0	0.000105538	0	0	0
ACYP2_HUMAN	P14621	ACYP2 ACYP	ACYP2	0.000214358	0	0.000402169	0	0	0	0
ADA_HUMAN	P00813	ADA ADA1	ADA	8.62661e-05	0	0	0.000157877	7.34407e-05	6.96514e-05	0
ADA10_HUMAN	O14672	ADAM10 KUZ MADM	ADAM10	0.000210319	0.000510492	0.0004066	0.000114778	3.5846e-05	0.000405435	0.000411674
ADA12_HUMAN	O43184	ADAM12 MLTN UNQ346/PRO545	ADAM12	2.35794e-05	0	0	0	0	0	0
ADA15_HUMAN	Q13444	ADAM15 MDC15	ADAM15	3.1661e-05	0.000122053	4.47622e-05	6.887e-05	0	0.000368478	0
ADA17_HUMAN	P78536	ADAM17 CSVP TACE	ADAM17	0	4.06844e-05	2.37842e-05	6.96019e-05	0	0.000184239	0
ADA19_HUMAN	Q9H013	ADAM19 MLTNB FKSG34	ADAM19	0	4.80463e-05	0	0	0	0	0
ADAM9_HUMAN	Q13443	ADAM9 KIAA0021 MCMP MDC9 MLTNG	ADAM9	0.000223243	0.000706835	0.000337394	0.000421553	1.65443e-05	0.00125298	0.000101335
ATS1_HUMAN	Q9UHI8	ADAMTS1 KIAA1346 METH1	ADAMTS1	2.23441e-05	0	0	0	0	0	0
DSRAD_HUMAN	P55265	ADAR ADAR1 DSRAD G1P1 IFI4	ADAR	4.74402e-05	0	0	0	1.10701e-05	0	0
ADCK5_HUMAN	Q3MIX3	ADCK5	ADCK5	1.77737e-05	0	0	0	0	0	0
ADDA_HUMAN	P35611	ADD1 ADDA	ADD1	0.000210613	0.000217988	0.000212018	7.60233e-05	8.36408e-05	0	0
ADDG_HUMAN	Q9UEY8	ADD3 ADDL	ADD3	0.000152725	0.000207542	0.000163865	8.02131e-05	4.76435e-05	0	0
ADGB_HUMAN	Q8N7X0	ADGB C6orf103 CAPN7L	ADGB	0	0	0	2.22345e-05	0	0	0
AGRA3_HUMAN	Q8IWK6	ADGRA3 GPR125 UNQ556/PRO1113	ADGRA3	0	0	0	0	1.03119e-05	0	0
AGRE2_HUMAN	Q9UHX3	ADGRE2 EMR2	ADGRE2	0	0	0	0	0	6.34601e-05	0
AGRE5_HUMAN	P48960	ADGRE5 CD97	ADGRE5	4.46275e-05	0.000342722	0.000240427	0.000158772	0	0.000496645	0
AGRG6_HUMAN	Q86SQ4	ADGRG6 DREG GPR126 VIGR	ADGRG6	0	0	0	2.90331e-05	0	0.000250135	0
AGRL2_HUMAN	O95490	ADGRL2 KIAA0786 LEC1 LPHH1 LPHN2	ADGRL2	0.000307273	0.000139275	9.13885e-05	5.18351e-05	0.000115455	0.000420472	2.12151e-05
AGRL3_HUMAN	Q9HAR2	ADGRL3 KIAA0768 LEC3 LPHN3	ADGRL3	1.45552e-05	0	0	1.99783e-05	9.29342e-06	0	0
AGRL4_HUMAN	Q9HBW9	ADGRL4 ELTD1 ETL UNQ202/PRO228	ADGRL4	0	3.23389e-05	0	0	0	0	0
ADHX_HUMAN	P11766	ADH5 ADHX FDH	ADH5	0.000102643	0	0	0.000364105	9.40959e-05	0	5.76343e-05
ADK_HUMAN	P55263	ADK	ADK	7.17444e-05	0	0	0	0	0	0
ADNP_HUMAN	Q9H2P0	ADNP ADNP1 KIAA0784	ADNP	0	0	0	0	1.21414e-05	0	0
AEDO_HUMAN	Q96SZ5	ADO C10orf22	ADO	0	8.40811e-05	0.000147462	0.000107883	0.000250922	9.51902e-05	7.68458e-05
ADPGK_HUMAN	Q9BRR6	ADPGK PSEC0260	ADPGK	0.000162926	0	0	0.00011987	4.18204e-05	0	0
ADPRS_HUMAN	Q9NX46	ADPRS ADPRHL2 ARH3	ADPRS	3.00786e-05	0	0	0	0	0	0
ADRM1_HUMAN	Q16186	ADRM1 GP110	ADRM1	0.000111721	0.000120116	7.58907e-05	0.000192648	0.000125461	6.7993e-05	5.48898e-05
PUR8_HUMAN	P30566	ADSL AMPS	ADSL	5.34822e-05	0	0	0	0.000232673	0.000148243	8.38318e-05
PURA2_HUMAN	P30520	ADSS2 ADSS	ADSS2	0.000117543	0	4.42385e-05	0.000226554	3.01107e-05	5.71141e-05	0
AFAP1_HUMAN	Q8N556	AFAP1 AFAP	AFAP1	0.000144823	0	0	0.000159827	0	0	0
AFAD_HUMAN	P55196	AFDN AF6 MLLT4	AFDN	5.66699e-06	1.21857e-05	0	0	0	0	0
AFF4_HUMAN	Q9UHB7	AFF4 AF5Q31 MCEF HSPC092	AFF4	0	0	0	0	0.000189674	0	2.72288e-05
AFG32_HUMAN	Q9Y4W6	AFG3L2	AFG3L2	7.25592e-05	0	7.30932e-05	0	4.22903e-05	3.8946e-05	3.88546e-05
FETA_HUMAN	P02771	AFP HPAFP	AFP	0	0	0	4.69056e-05	0	0	0
ASPG_HUMAN	P20933	AGA	AGA	0	0	0	8.74726e-05	0	0	0
AGAP1_HUMAN	Q9UPQ3	AGAP1 CENTG2 KIAA1099	AGAP1	0	0	0	0	3.20326e-05	0	0
AGAP3_HUMAN	Q96P47	AGAP3 CENTG3	AGAP3	0	0	0	0	1.58477e-05	0	0
AGFG1_HUMAN	P52594	AGFG1 HRB RAB RIP	AGFG1	5.05632e-05	0	3.81367e-05	0.00036271	2.59575e-05	0	0
AGK_HUMAN	Q53H12	AGK MULK	AGK	9.98355e-05	0	0	0	0	0	0
AGO1_HUMAN	Q9UL18	AGO1 EIF2C1	AGO1	3.6463e-05	0	9.12135e-05	0	0.00016297	0	0.0001426
AGO2_HUMAN	Q9UKV8	AGO2 EIF2C2	AGO2	8.80732e-05	0.000143025	0.00020523	0	0.000504431	0.000168111	0.000356501
AGO3_HUMAN	Q9H9G7	AGO3 EIF2C3	AGO3	2.43087e-05	0	0	0	0.000139689	0	0
PLCA_HUMAN	Q99943	AGPAT1 G15	AGPAT1	5.49875e-05	0	0	0	0	0	0
ADAS_HUMAN	O00116	AGPS AAG5	AGPS	0.000112486	0	0.000121201	4.43354e-05	3.09356e-05	0	0
AGRIN_HUMAN	O00468	AGRN AGRIN	AGRN	0	0	0	1.49147e-05	0.000291394	0	0
AGTR2_HUMAN	P50052	AGTR2	AGTR2	0	0	0.000161848	0	0	0.000139303	0
ATRAP_HUMAN	Q6RW13	AGTRAP ATRAP	AGTRAP	6.90039e-05	0	0	0.000380763	0	0	0
SAHH_HUMAN	P23526	AHCY SAHH	AHCY	0.000428972	0.000525507	0.000593561	0.000450877	0.000627306	0.000862238	0.0003362
SAHH2_HUMAN	O43865	AHCYL1 DCAL IRBIT XPVKONA	AHCYL1	0.000109354	6.41296e-05	7.49806e-05	0.000137139	0.000191381	0.000103644	0
SAHH3_HUMAN	Q96HN2	AHCYL2 KIAA0828	AHCYL2	0	0	0	0	0.000191001	0	0
AHNK_HUMAN	Q09666	AHNAK PM227	AHNAK	0.000573652	0.000427089	4.72614e-05	0.00183608	4.30836e-05	0.000122574	5.49771e-05
AHNK2_HUMAN	Q8IVF2	AHNAK2 C14orf78 KIAA2019	AHNAK2	8.09463e-06	0	0	3.14731e-05	0	0	0
AHSA1_HUMAN	O95433	AHSA1 C14orf3 HSPC322	AHSA1	0.000108046	0	0	0	0.000297145	0.000214562	9.10016e-05
FETUA_HUMAN	P02765	AHSG FETUA PRO2743	AHSG	0.000181153	0.000452744	0.000391994	0.000286963	0.000308827	0.000517737	0.000206892
AIDA_HUMAN	Q96BJ3	AIDA C1orf80	AIDA	0.000167581	0	0	0.00041612	0.000107538	0	0
AIF1_HUMAN	P55008	AIF1 G1 IBA1	AIF1	6.90039e-05	0	0	0	0	0	0
AIFM1_HUMAN	O95831	AIFM1 AIF PDCD8	AIFM1	0.000245647	0.000188241	0.000534017	0.000357591	0.000303354	0.000581352	0.000137634
AIMP1_HUMAN	Q12904	AIMP1 EMAP2 SCYE1	AIMP1	0.000431275	0	0	0	0.000199262	0	0.000101708
AIMP2_HUMAN	Q13155	AIMP2 JTV1 PRO0992	AIMP2	0.000184339	0	0	0	8.60305e-05	0.000116477	0
AIP_HUMAN	O00170	AIP XAP2	AIP	0	0	0	0	0.000217906	0	6.06677e-05
KAD1_HUMAN	P00568	AK1	AK1	0.000239945	0	0	0.000294226	0.000171083	0	0
KAD2_HUMAN	P54819	AK2 ADK2	AK2	0.000542324	0.000339558	0.00112592	0.00104596	0.000550099	0.000917683	0.000798014
KAD3_HUMAN	Q9UIJ7	AK3 AK3L1 AK6 AKL3L	AK3	0.000496297	0	0	0	0.00011581	0	0
KAD4_HUMAN	P27144	AK4 AK3 AK3L1	AK4	0.000234613	0	0	0.000258919	0	0	0
KAD5_HUMAN	Q9Y6K8	AK5	AK5	2.79302e-05	0	0	0	0	0	0
AKA12_HUMAN	Q02952	AKAP12 AKAP250	AKAP12	0.000252305	7.26355e-05	4.63231e-05	0.000110142	0	5.33597e-05	0
AKP13_HUMAN	Q12802	AKAP13 BRX HT31 LBC	AKAP13	0	0	0	2.10162e-05	0	0	0
AK17A_HUMAN	Q02040	AKAP17A CXYorf3 DXYS155E SFRS17A XE7	AKAP17A	0	0	0	0	1.85868e-05	0	0
AKAP2_HUMAN	Q9Y2D5	AKAP2 KIAA0920 PRKA2	AKAP2	0.000188898	0.000305347	0.000182834	0.00111173	1.58477e-05	0	0.000194137
AKAP8_HUMAN	O43823	AKAP8 AKAP95	AKAP8	1.54351e-05	0	0.00020373	0	6.93338e-05	0	0
AKP8L_HUMAN	Q9ULX6	AKAP8L NAKAP NAKAP95 HRIHFB2018	AKAP8L	2.45209e-05	0	0	0	0.000167282	5.66206e-05	0.000128076
AKAP9_HUMAN	Q99996	AKAP9 AKAP350 AKAP450 KIAA0803	AKAP9	0	5.56828e-06	0	0	0	0	0
AKIR2_HUMAN	Q53H80	AKIRIN2 C6orf166	AKIRIN2	0	0	0	0	6.84334e-05	0	0.000157185
AK1A1_HUMAN	P14550	AKR1A1 ALDR1 ALR	AKR1A1	0.000158523	0	0	0.000306154	0.00012207	0.000110181	0
ALDR_HUMAN	P15121	AKR1B1 ALDR1 ALR2	AKR1B1	0.000334244	0	0.000177078	0.000350857	0.000564575	0.000509585	0.000192114
AK1C1_HUMAN	Q04828	AKR1C1 DDH DDH1	AKR1C1	0	0	5.97818e-05	0.000174945	0	0	0
AK1C2_HUMAN	P52895	AKR1C2 DDH2	AKR1C2	7.92613e-05	0	0	0	0	0	0
ARK72_HUMAN	O43488	AKR7A2 AFAR AFAR1 AKR7	AKR7A2	0.00017596	0	0	0.000161824	7.52767e-05	0.000101917	0
AKTS1_HUMAN	Q96B36	AKT1S1 PRAS40	AKT1S1	4.34469e-05	0	0	0	0	0	0
HEM2_HUMAN	P13716	ALAD	ALAD	3.25852e-05	0	0	0	0	0	0
ALBU_HUMAN	P02768	ALB GIG20 GIG42 PRO0903 PRO1708 PRO2044 PRO2619 PRO2675 UNQ696/PRO1341	ALB	0.00364233	0.00621469	0.00492294	0.00479791	0.00161463	0.00706518	0.00442698
CD166_HUMAN	Q13740	ALCAM MEMD	ALCAM	0.00256015	0.00673295	0.000654496	0.00303723	0	0.00946458	3.54673e-05
A16A1_HUMAN	Q8IZ83	ALDH16A1	ALDH16A1	5.19266e-05	0	0	0	8.85608e-05	0	5.42441e-05
P5CS_HUMAN	P54886	ALDH18A1 GSAS P5CS PYCS	ALDH18A1	0.000371204	0	8.5986e-05	0.000260407	9.51774e-05	4.68584e-05	0
AL1A1_HUMAN	P00352	ALDH1A1 ALDC ALDH1 PUMB1	ALDH1A1	0	6.87936e-05	0	0	0	0	0
AL1A2_HUMAN	O94788	ALDH1A2 RALDH2	ALDH1A2	0	0	7.76115e-05	0.000170341	6.60322e-05	0	0
AL1A3_HUMAN	P47895	ALDH1A3 ALDH6	ALDH1A3	0.000288399	0	3.94987e-05	0.000493233	0	0.000109197	0
AL1B1_HUMAN	P30837	ALDH1B1 ALDH5 ALDHX	ALDH1B1	0.000118543	0	0.000227112	0.000567805	7.92386e-05	0.000178802	4.04451e-05
AL1L2_HUMAN	Q3SY69	ALDH1L2	ALDH1L2	0.000210147	0	0	0	0	0	0
ALDH2_HUMAN	P05091	ALDH2 ALDM	ALDH2	0.000199319	0	7.55023e-05	0.000866916	0	0	0
AL3A1_HUMAN	P30838	ALDH3A1 ALDH3	ALDH3A1	0	0	0	8.44912e-05	0	0	0
AL3A2_HUMAN	P51648	ALDH3A2 ALDH10 FALDH	ALDH3A2	9.62465e-05	0	0.000160867	5.88452e-05	0	7.41215e-05	0
AL4A1_HUMAN	P30038	ALDH4A1 ALDH4 P5CDH	ALDH4A1	3.78409e-05	0	0	5.22014e-05	0	0	0
SSDH_HUMAN	P51649	ALDH5A1 SSADH	ALDH5A1	0	0	0	5.67805e-05	2.64129e-05	0	0
MMSA_HUMAN	Q02252	ALDH6A1 MMSDH	ALDH6A1	0.000101126	0	0	0.000139504	0	0	0
AL7A1_HUMAN	P49419	ALDH7A1 ATQ1	ALDH7A1	0.00021788	0	0.00011216	0.000390611	0.000181702	0.000105431	0
AL9A1_HUMAN	P49189	ALDH9A1 ALDH4 ALDH7 ALDH9	ALDH9A1	0.000234019	0	7.70905e-05	0.000629317	6.97006e-05	7.54941e-05	6.40381e-05
ALDOA_HUMAN	P04075	ALDOA ALDA	ALDOA	0.00218638	0.00164928	0.00205819	0.00329788	0.00189157	0.00334084	0.00189159
ALDOC_HUMAN	P09972	ALDOC ALDC	ALDOC	0.000557968	0	0.000226864	0.000930111	0.000289526	0.000627442	0
ALG1_HUMAN	Q9BT22	ALG1 HMAT1 HMT1 PSEC0061 UNQ861/PRO1870	ALG1	6.10337e-05	0	0	0	0	0	0
ALG14_HUMAN	Q96F25	ALG14	ALG14	0	0	0	0.000134854	0	0	0
ALG2_HUMAN	Q9H553	ALG2 UNQ666/PRO1298	ALG2	4.99177e-05	0	0	6.88614e-05	0	0	0
ALG5_HUMAN	Q9Y673	ALG5 HSPC149	ALG5	6.3409e-05	0	0	0	0	0	0
ALK_HUMAN	Q9UM73	ALK	ALK	0	1.4332e-05	0.000100542	0	0	9.26518e-05	0
ALKB5_HUMAN	Q6P6C2	ALKBH5 ABH5 OFOXD1	ALKBH5	0.000187563	0	0.000100542	0	0	9.26518e-05	0
LOX12_HUMAN	P18054	ALOX12 12LO LOG12	ALOX12	0	0	0	2.12927e-05	0	0.000112725	0
LX12B_HUMAN	O75342	ALOX12B	ALOX12B	0.000383165	0	0	0	0	0	7.20429e-05
LOXE3_HUMAN	Q9BYJ1	ALOXE3	ALOXE3	0.000174662	0	0	0	0	0	2.84614e-05
PPBT_HUMAN	P05186	ALPL	ALPL	0.00022222	0.000885064	0.000511232	0	0	0.000450901	0
THOC4_HUMAN	Q86V81	ALYREF ALY BEF THOC4	ALYREF	0.000260682	0.000233559	0.000479458	0	0.000250922	0.000589004	0.000128076
AMBP_HUMAN	P02760	AMBP HCP ITIL	AMBP	0.00496297	0.0163635	0.012969	0.00834079	0	0.0109234	0
AMGO2_HUMAN	Q86SJ2	AMIGO2 ALI1	AMIGO2	0	0	0	2.79008e-05	0	0.000443127	0
AMOT_HUMAN	Q4VCS5	AMOT KIAA1071	AMOT	9.94124e-06	0	0	0	0	0	0
AMOL1_HUMAN	Q8IY63	AMOTL1	AMOTL1	0	0	0	0	3.5176e-05	0	0
AMPD2_HUMAN	Q01433	AMPD2	AMPD2	4.64581e-05	0	0	0	0.000290672	0	0.00012554
AMPH_HUMAN	P49418	AMPH AMPH1	AMPH	0	0	0	0	2.97145e-05	0	0
AMY1A_HUMAN	P0DUB6	AMY1A AMY1	AMY1A	0.000299595	0	0	0	0	0.000210863	0
AMYP_HUMAN	P04746	AMY2A	AMY2A	0.000101126	0	0	0	0	0.000210863	0
ANGL2_HUMAN	Q9UKU9	ANGPTL2 ARP2 UNQ170/PRO196	ANGPTL2	0	0	0	0	0.00018489	0	0
ANK2_HUMAN	Q01484	ANK2 ANKB	ANK2	0	0	7.64491e-05	3.72867e-06	0.00013529	1.40899e-05	8.76467e-05
ANK3_HUMAN	Q12955	ANK3	ANK3	0	5.25507e-06	9.21636e-06	0	3.13653e-05	0	0
ANFY1_HUMAN	Q9P2R3	ANKFY1 ANKHZN KIAA1255	ANKFY1	3.66583e-05	0	0	0	0	0	0
ANKH_HUMAN	Q9HCJ1	ANKH KIAA1581 UNQ241/PRO274	ANKH	4.36655e-05	0	0	0	0	0	0
ANKH1_HUMAN	Q8IWZ3	ANKHD1 KIAA1085 MASK VBARP PP2500	ANKHD1	6.54126e-06	0	0	0	8.39517e-06	0	0
ANKL2_HUMAN	Q86XL3	ANKLE2 KIAA0692 LEM4	ANKLE2	2.81987e-05	0	0	0	0	0	0
AN13A_HUMAN	Q8IZ07	ANKRD13A ANKRD13	ANKRD13A	6.05087e-05	9.27365e-05	0	0	0	0	0
ANR17_HUMAN	O75179	ANKRD17 GTAR KIAA0697	ANKRD17	0	0	0	0	8.24197e-06	0	0
ANR54_HUMAN	Q6NXT1	ANKRD54 LIAR	ANKRD54	0	0	0	0	9.12445e-05	0	0
ANKZ1_HUMAN	Q9H8Y5	ANKZF1 ZNF744	ANKZF1	1.44823e-05	0	0	0	0	0	0
ANLN_HUMAN	Q9NQW6	ANLN	ANLN	0	4.06844e-05	0	0	0	0	0
ANO10_HUMAN	Q9NW15	ANO10 TMEM16K	ANO10	1.54351e-05	0	0	0	0	0	0
AN32A_HUMAN	P39687	ANP32A C15orf1 LANP MAPM PHAP1	ANP32A	0.000293877	0	0.00045764	0.00117183	0.000934469	0.000843451	0.000794956
AN32B_HUMAN	Q92688	ANP32B APRIL PHAPI2	ANP32B	0.000202762	8.69804e-05	0.00045764	0.000892824	0.000597022	0.000632588	0.00035773
AN32E_HUMAN	Q9BTT0	ANP32E	ANP32E	3.78409e-05	0	0	0	0.000242828	0	0.00011155
AMPN_HUMAN	P15144	ANPEP APN CD13 PEPN	ANPEP	0.00289961	0.00100897	0.000189222	0.0010178	0	0.00257014	0
ANTR1_HUMAN	Q9H6X2	ANTXR1 ATR TEM8	ANTXR1	0.000107394	0.000540521	0.000493561	0.000114508	4.77947e-05	0.000595679	0.000182966
ANTR2_HUMAN	P58335	ANTXR2 CMG2	ANTXR2	0.0004908	0.000794099	0.000483082	0.000261351	5.57605e-05	0.000702527	0.000256153
ANXA1_HUMAN	P04083	ANXA1 ANX1 LPC1	ANXA1	0.00135687	0.00029105	0.00103077	0.00147521	0.000270224	0.000444384	0.000413785
ANX10_HUMAN	Q9UJ72	ANXA10 ANX14	ANXA10	4.75568e-05	0	0	0	0	0	0
ANX11_HUMAN	P50995	ANXA11 ANX11	ANXA11	0.000239505	0.000140135	0.000154181	0.000269707	4.18204e-05	0	0
ANXA2_HUMAN	P07355	ANXA2 ANX2 ANX2L4 CAL1H LPC2D	ANXA2	0.00503128	0.00685584	0.00455839	0.0083931	0.000965086	0.00401498	0.00277827
ANXA3_HUMAN	P12429	ANXA3 ANX3	ANXA3	0	0	0	0.000719219	0	0	0
ANXA4_HUMAN	P09525	ANXA4 ANX4	ANXA4	0.000276974	0	0	0.000539415	0	0	0
ANXA5_HUMAN	P08758	ANXA5 ANX5 ENX2 PP4	ANXA5	0.00198488	0.000525507	0.00103537	0.00108688	0.000418204	0.0014214	0.000320191
ANXA6_HUMAN	P08133	ANXA6 ANX6	ANXA6	0.000714999	0.00013276	0.000539247	0.000335641	0.00138668	0.000721492	0.00107685
ANXA7_HUMAN	P20073	ANXA7 ANX7 SNX OK/SW-cl.95	ANXA7	0.000221946	0	0.00015709	0.000244263	0	0.000153837	0
AXA81_HUMAN	Q5VT79	ANXA8L1 ANXA8L2	ANXA8L1	0	0	0	0.000481099	0	0	0
AOC1_HUMAN	P19801	AOC1 ABP1 DAO1	AOC1	0	0	0.000156136	0	0	0.00010079	0
AOXA_HUMAN	Q06278	AOX1 AO	AOX1	0	0	0	8.74726e-05	0	0	0
AP1B1_HUMAN	Q10567	AP1B1 ADTB1 BAM22 CLAPB2	AP1B1	0.000344356	0.000276266	0.000174711	0.000356992	0.000143384	0.000135889	5.48898e-05
AP1G1_HUMAN	O43747	AP1G1 ADTG CLAPG1	AP1G1	6.13612e-05	0	4.86138e-05	8.89145e-05	4.13608e-05	0	0
AP1M1_HUMAN	Q9BXS5	AP1M1 CLTNM	AP1M1	7.20614e-05	0	0	9.90761e-05	0.000138263	0	7.05727e-05
AP1S1_HUMAN	P61966	AP1S1 AP19 CLAPS1	AP1S1	9.26105e-05	0	0	0	0	0	0
AP1S2_HUMAN	P56377	AP1S2 DC22	AP1S2	6.17404e-05	0	0	0	0	0	0
AP2A1_HUMAN	O95782	AP2A1 ADTAA CLAPA1	AP2A1	0.000509289	0.000595574	0.00028791	0.000483983	0.000125461	0.000283103	0.000202787
AP2A2_HUMAN	O94973	AP2A2 ADTAB CLAPA2 HIP9 HYPJ KIAA0899	AP2A2	0.000313914	0.000315304	0.000164502	0.000252814	0.000123048	0.000137196	0.000121919
AP2B1_HUMAN	P63010	AP2B1 ADTB2 CLAPB1	AP2B1	0.000532191	0.000504487	0.000326493	0.00053334	0.000215076	0.000252366	0.00010978
AP2M1_HUMAN	Q96CW1	AP2M1 CLAPM1 KIAA0109	AP2M1	0.00030547	0.000403589	0.000169125	0.000376631	0.000150553	0.000163067	0.000207484
AP2S1_HUMAN	P53680	AP2S1 AP17 CLAPS2	AP2S1	0.000207706	0.000370946	0	0	0	0	0
AP3B1_HUMAN	O00203	AP3B1 ADTB3A	AP3B1	6.55129e-05	0	0	0	8.08758e-05	0	2.8579e-05
AP3D1_HUMAN	O14617	AP3D1 PRO0039	AP3D1	3.60944e-05	0	0	0	4.63241e-05	0	0
AP3M1_HUMAN	Q9Y2T2	AP3M1	AP3M1	7.48766e-05	0	0	0	0	0	0
AP3S1_HUMAN	Q92572	AP3S1 CLAPS3	AP3S1	0.000159964	0	0	0.000147113	6.84334e-05	0	0
APC_HUMAN	P25054	APC DP2.5	APC	0	0	0	0	1.6889e-05	0	0
ACPH_HUMAN	P13798	APEH D3F15S2 D3S48E DNF15S2	APEH	5.4418e-05	0	0	0.000199783	8.36408e-05	0	0
APEX1_HUMAN	P27695	APEX1 APE APE1 APEX APX HAP1 REF1	APEX1	0.000162926	0	0.000122885	0.000584366	0.000334563	0.000396344	0.000128076
API5_HUMAN	Q9BZZ5	API5 MIG8	API5	8.46506e-05	0	0.000149961	0.000219423	6.37938e-05	0	3.90741e-05
MTNB_HUMAN	Q96GX9	APIP CGI-29	APIP	4.34469e-05	0	0	0	0	0	0
APLP2_HUMAN	Q06481	APLP2 APPL2	APLP2	2.69671e-05	0	0.000127122	0	0	0	0
APMAP_HUMAN	Q9HDC9	APMAP C20orf3 UNQ1869/PRO4305	APMAP	0.000376916	0	0.000683055	0.00193486	0.000196374	0.000270368	0.000200467
APOA1_HUMAN	P02647	APOA1	APOA1	0.000570469	0	0	0	0	0	0.000483385
APOA2_HUMAN	P02652	APOA2	APOA2	0	0	0	0	0	0	0.000209579
APOB_HUMAN	P04114	APOB	APOB	0	0	1.71467e-05	3.13613e-06	0	0	0
ABC3C_HUMAN	Q9NRW3	APOBEC3C APOBEC1L PBI	APOBEC3C	5.10029e-05	0	0	0	0	0	0
APOD_HUMAN	P05090	APOD	APOD	0.000279864	0.000480463	0.000495582	0.000905262	0	0.00135889	0.000219559
APOE_HUMAN	P02649	APOE	APOE	7.35626e-05	0.000140135	0.00042466	0.0001623	0	0.000713927	0
APOL2_HUMAN	Q9BQE5	APOL2	APOL2	0.000135063	0.000238608	0.000281276	0.000267254	0	0.000385906	0
MIC26_HUMAN	Q9BUR5	APOO FAM121B MIC23 MIC26 My025 UNQ1866/PRO4302	APOO	0	0	0.000100542	0.000294226	0.00010265	0	0
MIC27_HUMAN	Q6UXV4	APOOL CXorf33 FAM121A MIC27 UNQ8193/PRO23204	APOOL	0.000141577	0	0	0.000111603	0	0	0
A4_HUMAN	P05067	APP A4 AD1	APP	2.69671e-05	0	0.000279669	1.86005e-05	5.1915e-05	0	0
DP13A_HUMAN	Q9UKG1	APPL1 APPL DIP13A KIAA1428	APPL1	1.46633e-05	0	0	0	4.70479e-05	0	0
DP13B_HUMAN	Q8NEU8	APPL2 DIP13B	APPL2	2.37784e-05	0	0	0	0	0	0
APT_HUMAN	P07741	APRT	APRT	0.000234909	0	0	0.000161824	0.000188192	0	0
APTX_HUMAN	Q7Z2E3	APTX AXA1	APTX	0	0	0	0	0.000128521	0	0
AQP1_HUMAN	P29972	AQP1 CHIP28	AQP1	0.00069112	0	0	0	0	0	0
ARAP1_HUMAN	Q96P48	ARAP1 CENTD2 KIAA0782	ARAP1	0	0	2.73077e-05	9.98916e-06	0	0	0
COPD_HUMAN	P48444	ARCN1 COPD	ARCN1	0.000314572	0.000154886	0.000133531	0.000198732	0.000237716	0.000250323	0.000202226
ARF1_HUMAN	P84077	ARF1	ARF1	0.00110661	0.000240232	0.000693815	0	0	0.000582383	0
ARF3_HUMAN	P61204	ARF3	ARF3	0	0	0.00031599	0.000462355	0	0.000271972	0
ARF4_HUMAN	P18085	ARF4 ARF2	ARF4	0.00126107	0.000240232	0.000508009	0.000494402	0.00017923	0.000543944	0
ARF5_HUMAN	P84085	ARF5	ARF5	0.000868646	0	0.00031599	0.000308237	0	0.000378646	0
ARF6_HUMAN	P62330	ARF6	ARF6	0.000176403	0	0.000110596	0.000161824	0	0	0
ARFG1_HUMAN	Q8N6T3	ARFGAP1 ARF1GAP	ARFGAP1	0.000143834	0	0.000147462	0.000215766	6.69126e-05	9.05929e-05	0
ARFG2_HUMAN	Q8N6H7	ARFGAP2 ZNF289 Nbla10535	ARFGAP2	2.05801e-05	0	0	0.000141951	3.96193e-05	0	0
ARFG3_HUMAN	Q9NP61	ARFGAP3 ARFGAP1	ARFGAP3	0.000103108	0.00013276	0	0.000227122	2.64129e-05	7.15207e-05	6.06677e-05
BIG1_HUMAN	Q9Y6D6	ARFGEF1 ARFGEP1 BIG1	ARFGEF1	1.2657e-05	0	0	0	0	0	0
BIG2_HUMAN	Q9Y6D5	ARFGEF2 ARFGEP2 BIG2	ARFGEF2	1.45182e-05	0	0	0	0	0	0
ARFP1_HUMAN	P53367	ARFIP1	ARFIP1	4.18952e-05	0.000150145	0.000157995	0.000385296	0	0	0
ARFP2_HUMAN	P53365	ARFIP2 POR1	ARFIP2	0	0	5.82086e-05	0.000255512	0	0	0
ARGI1_HUMAN	P05089	ARG1	ARG1	0.00077433	0.000252243	0.000836396	0.000623458	0.000150553	0.00059435	0.00111975
ARGL1_HUMAN	Q9NWB6	ARGLU1	ARGLU1	6.2387e-05	0.000114656	0.000201084	0	0	0	0
RHG01_HUMAN	Q07960	ARHGAP1 CDC42GAP RHOGAP1	ARHGAP1	0.000152735	0	0	0.000194189	0.000120443	0	0
RHG17_HUMAN	Q68EM7	ARHGAP17 RICH1 MSTP066 MSTP110	ARHGAP17	2.46961e-05	0	0	0	0	0	0
RHG18_HUMAN	Q8N392	ARHGAP18	ARHGAP18	6.25636e-05	0	0	0.000107883	0	0	0
RHG21_HUMAN	Q5T5U3	ARHGAP21 ARHGAP10 KIAA1424	ARHGAP21	5.40584e-06	0	0	0	0	0	0
RHG28_HUMAN	Q9P2N2	ARHGAP28 KIAA1314	ARHGAP28	0	0	0	0	1.83602e-05	0	0
RHG29_HUMAN	Q52LW3	ARHGAP29 PARG1	ARHGAP29	3.30441e-05	0	0	0	0	0	0
RHG35_HUMAN	Q9NRY4	ARHGAP35 GRF1 GRLF1 KIAA1722 P190A p190ARHOGAP	ARHGAP35	2.40101e-05	0	0	0	0	0	0
RHG39_HUMAN	Q9C0H5	ARHGAP39 KIAA1688	ARHGAP39	0	0	0	0	1.24424e-05	0	0
GDIR1_HUMAN	P52565	ARHGDIA GDIA1	ARHGDIA	0.000485298	0.000219342	0.000472344	0.000703584	0.000523664	0.000735752	0.000300701
ARHGI_HUMAN	Q6ZSZ5	ARHGEF18 KIAA0521	ARHGEF18	0	0	2.73874e-05	0	0	0	0
ARHG2_HUMAN	Q92974	ARHGEF2 KIAA0651 LFP40	ARHGEF2	3.14214e-05	0	0	0	0.000383105	0.000109197	0.000144086
ARHGQ_HUMAN	Q96DR7	ARHGEF26 SGEF HMFN1864	ARHGEF26	0	0	0	0	1.5521e-05	0	0
ARH40_HUMAN	Q8TER5	ARHGEF40 SOLO	ARHGEF40	0	0	0	0	2.73733e-05	0	0
ARHG7_HUMAN	Q14155	ARHGEF7 COOL1 KIAA0142 P85SPR PAK3BP PIXB Nbla10314	ARHGEF7	1.95511e-05	0	0	0	0	0	0
ARI5B_HUMAN	Q14865	ARID5B DESRT MRF2	ARID5B	0	1.91093e-05	0	0	0	0	0
ARL1_HUMAN	P40616	ARL1	ARL1	0.000146928	0.000126122	0	0.000242737	0	0	0
ARL2_HUMAN	P36404	ARL2	ARL2	8.37905e-05	0	0	0	0	0	0
ARL3_HUMAN	P36405	ARL3 ARFL3	ARL3	0.00017655	0	0.000331789	0.000242737	0.000150553	0.000203834	0
AR6P1_HUMAN	Q15041	ARL6IP1 ARL6IP ARMER KIAA0069	ARL6IP1	7.65044e-05	0.000109671	0.000180995	0	6.5458e-05	0	0
AR6P4_HUMAN	Q66PJ3	ARL6IP4	ARL6IP4	0	0	0	0	5.01845e-05	0	0
PRAF3_HUMAN	O75915	ARL6IP5 DERP11 JWA PRA2 PRAF3 HSPC127	ARL6IP5	0.000480562	0.000114656	0.000301626	0.000882678	0	0.000129805	0
AR6P6_HUMAN	Q8N6S5	ARL6IP6 PFAAP1	ARL6IP6	9.43176e-05	0	0	0	0	0	0
ARL8A_HUMAN	Q96BM9	ARL8A ARL10B GIE2	ARL8A	0	0	0.00010533	0.000770592	0	0	0
ARL8B_HUMAN	Q9NVJ2	ARL8B ARL10C GIE1	ARL8B	0.000239945	0	0.000201084	0	0	0.000129805	0
ARMC1_HUMAN	Q9NVT9	ARMC1 ARCP	ARMC1	5.67613e-05	0.000162738	7.13525e-05	0	0	0	0
ARM10_HUMAN	Q8N2F6	ARMC10 SVH PSEC0198	ARMC10	4.63053e-05	0	0	0.000255512	0	0	0
ARMC6_HUMAN	Q6NXE6	ARMC6	ARMC6	0	0	0	0	4.18204e-05	0	0
ARMX2_HUMAN	Q7L311	ARMCX2 ALEX2 KIAA0512	ARMCX2	4.44343e-05	0	0	0	0	0	0
ARMX3_HUMAN	Q9UH62	ARMCX3 ALEX3 BM-017 UNQ2517/PRO6007	ARMCX3	2.72806e-05	0	0	0	3.50124e-05	0	0
ARNT_HUMAN	P27540	ARNT BHLHE2	ARNT	0	0	0	0	5.1915e-05	0	0
ARC1A_HUMAN	Q92747	ARPC1A SOP2L	ARPC1A	0.000462886	0.000930898	0.000325235	0.000346165	0.000286768	0.000194128	0.000247004
ARC1B_HUMAN	O15143	ARPC1B ARC41	ARPC1B	0.000889904	0.00123045	0.000913805	0.000754711	0.000183602	9.94312e-05	0.000309257
ARPC2_HUMAN	O15144	ARPC2 ARC34 PRO2446	ARPC2	0.00124719	0.00155797	0.000617946	0.000778575	0.000221402	0.000239805	0.000406831
ARPC3_HUMAN	O15145	ARPC3 ARC21	ARPC3	0.000602747	0.000660637	0.000250898	0.000482639	0.000143384	0.000407958	0.000219559
ARPC4_HUMAN	P59998	ARPC4 ARC20	ARPC4	0.00141299	0.00138734	0.00095296	0.00105954	0.000376383	0.000418012	0.000461075
ARPC5_HUMAN	O15511	ARPC5 ARC16	ARPC5	0.000735749	0.000867086	0.000532594	0.00106465	0	0.000713927	0
ARP5L_HUMAN	Q9BPX5	ARPC5L	ARPC5L	0.000571366	0.00089027	0.000497427	0.000453415	0.000265682	0.000203894	0.000406831
ARRB1_HUMAN	P49407	ARRB1 ARR1	ARRB1	0	0	0.000329436	0	0.000176179	0.000173476	0.000294303
ARSA_HUMAN	P15289	ARSA	ARSA	7.60321e-05	0	0	0.00023974	2.78803e-05	5.28834e-05	0
ARSB_HUMAN	P15848	ARSB	ARSB	3.91022e-05	0	0	8.09122e-05	2.50922e-05	0	0
ASAH1_HUMAN	Q13510	ASAH1 ASAH HSD-33 HSD33	ASAH1	0.00021598	0.000112108	0.000213944	0.000446487	0.000133825	0.000888442	5.12305e-05
ASAP1_HUMAN	Q9ULH1	ASAP1 DDEF1 KIAA1249	ASAP1	1.39651e-05	0	0	0	1.7923e-05	0	0
ASCC2_HUMAN	Q9H1I8	ASCC2 ASC1P100	ASCC2	2.72806e-05	0	0	0	3.50124e-05	0	0
ASCC3_HUMAN	Q8N3C0	ASCC3 HELIC1	ASCC3	0	0	0	1.28944e-05	3.29898e-05	0	0
ASF1A_HUMAN	Q9Y294	ASF1A CGI-98 HSPC146	ASF1A	0	0	0.000192341	0	0	0	0
ASH1L_HUMAN	Q9NR48	ASH1L KIAA1420 KMT2H	ASH1L	0	0	0	0	0	0	6.92304e-06
ARLY_HUMAN	P04424	ASL	ASL	3.38385e-05	0	0	0.00012448	0	0	0
ASML_HUMAN	O95671	ASMTL	ASMTL	9.35053e-05	0	0	0	6.5458e-05	0	0
ASNS_HUMAN	P08243	ASNS TS11	ASNS	0	0	0	0	3.52859e-05	0	0
ASPH_HUMAN	Q12797	ASPH BAH	ASPH	0.000423467	0.00024931	0.0001286	0.000268388	0.00011379	0	0
APRV1_HUMAN	Q53RT3	ASPRV1 SASP	ASPRV1	0	0	0	0	0	0	6.23074e-05
ASPC1_HUMAN	Q9BZE9	ASPSCR1 ASPL RCC17 TUG UBXD9 UBXN9	ASPSCR1	0	0	0	0	3.76383e-05	0	0
ASSY_HUMAN	P00966	ASS1 ASS	ASS1	6.23972e-05	0	0	0	0	8.67379e-05	0.000171677
ASTN2_HUMAN	O75129	ASTN2 KIAA0634	ASTN2	0	0	5.97818e-05	0	0	0	0
ATAD1_HUMAN	Q8NBU5	ATAD1 FNP001	ATAD1	2.86114e-05	0	0	7.89387e-05	0	0	0
ATD3A_HUMAN	Q9NVI7	ATAD3A	ATAD3A	0.00013639	3.55272e-05	9.34617e-05	0	3.18071e-05	0.000172254	8.11751e-05
ATD3B_HUMAN	Q5T9A4	ATAD3B KIAA1273 TOB3	ATAD3B	0.000208902	0	0.000121201	0.000155174	0	0.00011169	7.89511e-05
ATD3C_HUMAN	Q5T2N8	ATAD3C	ATAD3C	0	5.48355e-05	9.61707e-05	0.000211075	0	0	0
ATF1_HUMAN	P18846	ATF1	ATF1	0	0	0.000381367	0.000223206	0	0.000295418	0
ATG3_HUMAN	Q9NT62	ATG3 APG3 APG3L	ATG3	4.88778e-05	7.00676e-05	0	0	0	0	0.000128076
ATG7_HUMAN	O95352	ATG7 APG7L	ATG7	1.50393e-05	0	0	0	0	0	0
PUR9_HUMAN	P31939	ATIC PURH OK/SW-cl.86	ATIC	0.000262093	0	6.50482e-05	4.97921e-05	0.000312688	0.000376309	5.32009e-05
ATLA2_HUMAN	Q8NHH9	ATL2 ARL6IP2	ATL2	0	0	6.70281e-05	4.90377e-05	0	0	0
ATLA3_HUMAN	Q6DD88	ATL3	ATL3	0.000240624	0	0	0.000265286	0	4.68149e-05	0
AT11C_HUMAN	Q8NB49	ATP11C ATPIG ATPIQ	ATP11C	1.36403e-05	0	0	2.50891e-05	0	0	0
AT12A_HUMAN	P54707	ATP12A ATP1AL1	ATP12A	7.11447e-05	0	0	0	0	0	0
AT131_HUMAN	Q9HD20	ATP13A1 ATP13A KIAA1825 CGI-152	ATP13A1	8.82005e-05	0	1.6631e-05	9.7338e-05	0	0	0
AT133_HUMAN	Q9H7F0	ATP13A3 AFURS1	ATP13A3	1.27507e-05	0	0	0	0	0	0
AT1A1_HUMAN	P05023	ATP1A1	ATP1A1	0.000432044	0.000357159	0.000449033	0.000482086	0.000139895	0.000463821	0.000183614
AT1A2_HUMAN	P50993	ATP1A2 KIAA0778	ATP1A2	0.000204819	0	0.000533232	0.000274523	0	0.000229476	0
AT1B1_HUMAN	P05026	ATP1B1 ATP1B	ATP1B1	5.04429e-05	7.20695e-05	0.000182138	0.000182997	0.000107538	0.00048955	0
AT1B3_HUMAN	P54709	ATP1B3	ATP1B3	0.000413513	0.000709434	0.000750156	0.000342017	7.05719e-05	0.000968719	0.000144086
AT2A1_HUMAN	O14983	ATP2A1	ATP2A1	0	0	0	0	4.79033e-05	0	6.28738e-05
AT2A2_HUMAN	P16615	ATP2A2 ATP2B	ATP2A2	0.000350166	4.38684e-05	0.000265307	0.000534724	7.85496e-05	0.000104593	0.000100234
AT2B1_HUMAN	P20020	ATP2B1 PMCA1	ATP2B1	0.000139314	9.34234e-05	0.000173807	0.000174631	0.000128249	7.54941e-05	0.000136615
AT2B3_HUMAN	Q16720	ATP2B3	ATP2B3	7.00338e-05	0	0.000132055	9.66116e-05	0	2.13112e-05	0
AT2B4_HUMAN	P23634	ATP2B4 ATP2B2 MXRA1	ATP2B4	0.000174645	0.000100532	0.000144256	0.000211075	5.45483e-05	0	0
AT2C1_HUMAN	P98194	ATP2C1 KIAA1347 PMR1L HUSSY-28	ATP2C1	2.90363e-05	0	0	4.80666e-05	0	0	0
ATPA_HUMAN	P25705	ATP5F1A ATP5A ATP5A1 ATP5AL2 ATPM	ATP5F1A	0.00174354	0.000987953	0.0019287	0.00211367	0.00106642	0.0013557	0.00111426
ATPB_HUMAN	P06576	ATP5F1B ATP5B ATPMB ATPSB	ATP5F1B	0.00176385	0.000730178	0.00193778	0.00203768	0.00104331	0.0018745	0.000889793
ATPG_HUMAN	P36542	ATP5F1C ATP5C ATP5C1 ATP5CL1	ATP5F1C	0.00022244	0.000114656	0.000260204	0.000294226	0.000250922	0.000247072	0.000174649
ATPD_HUMAN	P30049	ATP5F1D ATP5D	ATP5F1D	0.000207533	0	0.000260227	0.000409824	0	0.000335965	0
ATP5E_HUMAN	P56381	ATP5F1E ATP5E	ATP5F1E	0.000293267	0	0.000737309	0.000809122	0	0.00142785	0
AT5EL_HUMAN	Q5VTU8	ATP5F1EP2 ATP5EP2	ATP5F1EP2	0	0	0	0	0.000250922	0	0
ATIF1_HUMAN	Q9UII2	ATP5IF1 ATPI ATPIF1	ATP5IF1	0.000244881	0	0.000520361	0	0	0	0
ATPMD_HUMAN	Q96IX5	ATP5MD DAPIT HCVFTP2 USMG5 PD04912	ATP5MD	0.000293267	0	0.000737309	0.000809122	0	0.000475951	0
ATP5I_HUMAN	P56385	ATP5ME ATP5I ATP5K	ATP5ME	0.0004399	0	0.000805007	0.0010114	0	0	0
ATPK_HUMAN	P56134	ATP5MF ATP5J2 ATP5JL	ATP5MF	0.000533212	0	0.000289764	0.000441339	0	0.000315109	0
ATP5L_HUMAN	O75964	ATP5MG ATP5L	ATP5MG	0.000853139	0	0.000573598	0.000735565	0.000342167	0.000741215	0.000209579
ATP68_HUMAN	P56378	ATP5MPL C14orf2 MP68 PRO1574	ATP5MPL	0.000251371	0	0	0	0	0	0
AT5F1_HUMAN	P24539	ATP5PB ATP5F1	ATP5PB	0.000465182	8.69804e-05	0.000222071	0.000111603	0	0	0
ATP5H_HUMAN	O75947	ATP5PD ATP5H My032	ATP5PD	0.00062043	0.000350338	0.00101915	0.00113372	0.000209102	0.000895	0.000384229
ATP5J_HUMAN	P18859	ATP5PF ATP5A ATP5J ATPM	ATP5PF	0.000181153	0	0.000340296	0.000871362	0	0	0
ATPO_HUMAN	P48047	ATP5PO ATP5O ATPO	ATP5PO	0.000855582	0.00060319	0.000888093	0.000592128	0.000458206	0.000673671	0.000100234
VAS1_HUMAN	Q15904	ATP6AP1 ATP6IP1 ATP6S1 VATPS1 XAP3	ATP6AP1	6.22075e-05	0	4.25371e-05	0.000248961	0	0.000105856	0
RENR_HUMAN	O75787	ATP6AP2 ATP6IP2 CAPER ELDF10 HT028 MSTP009 PSEC0072	ATP6AP2	7.51966e-05	0	0	0.000290454	0	7.32232e-05	0
VPP1_HUMAN	Q93050	ATP6V0A1 ATP6N1 ATP6N1A VPP1	ATP6V0A1	3.67198e-05	0	0	0	0	0.000127396	0
VPP2_HUMAN	Q9Y487	ATP6V0A2	ATP6V0A2	1.19701e-05	0	0	0	0	0	0
VATL_HUMAN	P27449	ATP6V0C ATP6C ATP6L ATPL	ATP6V0C	7.33167e-05	0	0	0.00020228	0	0	0
VA0D1_HUMAN	P61421	ATP6V0D1 ATP6D VPATPD	ATP6V0D1	0.000139597	0	0.000104072	0.000161824	5.64575e-05	0.000254793	0
VATA_HUMAN	P38606	ATP6V1A ATP6A1 ATP6V1A1 VPP2	ATP6V1A	0.00025066	0.000111284	0.000418985	0.000350959	0.000188192	0.000809341	6.78051e-05
VATB1_HUMAN	P15313	ATP6V1B1 ATP6B1 VATB VPP3	ATP6V1B1	4.13674e-05	0	0	0	0	0	0
VATB2_HUMAN	P21281	ATP6V1B2 ATP6B2 VPP3	ATP6V1B2	0.000211619	8.85064e-05	0.000443922	0.000387159	0.00018489	0.000507815	6.06677e-05
VATC1_HUMAN	P21283	ATP6V1C1 ATP6C ATP6D VATC	ATP6V1C1	6.66515e-05	0	0	0.000331004	5.1325e-05	9.26518e-05	0
VATD_HUMAN	Q9Y5K8	ATP6V1D ATP6M VATD	ATP6V1D	0.000126002	0	0	0	0	0.000145596	0
VATE1_HUMAN	P36543	ATP6V1E1 ATP6E ATP6E2	ATP6V1E1	0.000226271	0.000145525	0.00049037	0.000327584	5.79051e-05	0.000783977	0
VATF_HUMAN	Q16864	ATP6V1F ATP6S14 VATF	ATP6V1F	9.02359e-05	0	0.000340296	0.000248961	0	0.00021967	0
VATG1_HUMAN	O75348	ATP6V1G1 ATP6G ATP6G1 ATP6J	ATP6V1G1	0.000126107	0	0.000608679	0.000417343	0	0.000873575	0
VATH_HUMAN	Q9UI12	ATP6V1H CGI-11	ATP6V1H	2.09476e-05	0	0	0	0	0	0
AT8B1_HUMAN	O43520	ATP8B1 ATPIC FIC1 PFIC	ATP8B1	1.22194e-05	0	0	0	0	0	0
ATPF1_HUMAN	Q5TC12	ATPAF1 ATP11	ATPAF1	0	0	0	8.99024e-05	0	0	0
ATPF2_HUMAN	Q8N5M1	ATPAF2 ATP12 LP3663	ATPAF2	0	0	0.000268112	0.000147113	0	0	0
ATRN_HUMAN	O75882	ATRN KIAA0548 MGCA	ATRN	1.85187e-05	3.96609e-05	4.17345e-05	7.23689e-05	1.89375e-05	0.000251446	0
ATRX_HUMAN	P46100	ATRX RAD54L XH2	ATRX	0	0	0	0	1.06398e-05	0	0
ATX1_HUMAN	P54253	ATXN1 ATX1 SCA1	ATXN1	1.34835e-05	0	0	0	0	0	0
ATX10_HUMAN	Q9UBB4	ATXN10 SCA10	ATXN10	0.000138667	9.51861e-05	0	0	0.000184641	0.000161644	0.000152242
ATX2_HUMAN	Q99700	ATXN2 ATX2 SCA2 TNRC13	ATXN2	5.86533e-05	1.80174e-05	0	0	1.61307e-05	0	0
ATX2L_HUMAN	Q8WWM7	ATXN2L A2D A2LG A2LP A2RP	ATXN2L	6.49865e-05	0.000100451	0.000117447	0.000100245	0.00015988	0.000110061	0.000183614
AUP1_HUMAN	Q9Y679	AUP1	AUP1	5.10029e-05	0	0	0	0	0	0
AURKA_HUMAN	O14965	AURKA AIK AIRK1 ARK1 AURA AYK1 BTAK IAK1 STK15 STK6	AURKA	0	0	0	0	4.90935e-05	0	0.000100234
AURKB_HUMAN	Q96GD4	AURKB AIK2 AIM1 AIRK2 ARK2 STK1 STK12 STK5	AURKB	0	0	0	0	9.65086e-05	0	0
AVEN_HUMAN	Q9NQS1	AVEN	AVEN	0	0	0	0	3.86034e-05	0	0
AVL9_HUMAN	Q8NBF6	AVL9 KIAA0241	AVL9	0	0	0	4.49512e-05	0	0	0
UFO_HUMAN	P30530	AXL UFO	AXL	3.30382e-05	0.000154435	0.000112853	4.05871e-05	0	0.000466238	0
ZA2G_HUMAN	P25311	AZGP1 ZAG ZNGP1	AZGP1	0.000934418	0.00089027	0.000839888	0.001113	0.000177122	0.00155903	0.00152561
CAP7_HUMAN	P20160	AZU1	AZU1	0.000218328	0	0	0	0	0	0
B2MG_HUMAN	P61769	B2M CDABP0092 HDCMA22P	B2M	0.000546536	0.000630608	0.000450684	0.00105614	0	0.00183581	0.000658678
B3GT6_HUMAN	Q96L58	B3GALT6	B3GALT6	0	6.81739e-05	0	0	4.06901e-05	0	0
B3GA3_HUMAN	O94766	B3GAT3	B3GAT3	7.92613e-05	0	0	0	0	0	0
B4GT1_HUMAN	P15291	B4GALT1 GGTB2	B4GALT1	8.01831e-05	0	5.02711e-05	0.000294226	0	0	0
B4GT4_HUMAN	O60513	B4GALT4 UNQ552/PRO1109	B4GALT4	4.399e-05	0	0	0	0	0	0
B4GA1_HUMAN	O43505	B4GAT1 B3GNT1 B3GNT6	B4GAT1	0	0	0	6.88614e-05	0	0	0
BABA1_HUMAN	Q9NWV8	BABAM1 C19orf62 MERIT40 NBA1 HSPC142	BABAM1	0	0	0	0	4.06901e-05	0	0
BABA2_HUMAN	Q9NXR7	BABAM2 BRCC45 BRE	BABAM2	2.66606e-05	0	0	0	3.42167e-05	0	0
BAG2_HUMAN	O95816	BAG2	BAG2	0.000944341	0.000630608	0.00049059	0.000743479	0.000219557	0.00107089	0
BAG3_HUMAN	O95817	BAG3 BIS	BAG3	8.99673e-05	0.000162738	0.000122762	0.00027983	7.28484e-05	0.000644837	0
BAG4_HUMAN	O95429	BAG4 SODD	BAG4	0	0	8.84771e-05	0	9.0332e-05	0.000171342	0.000253591
BAG5_HUMAN	Q9UL15	BAG5 KIAA0873	BAG5	0	0	8.67422e-05	0	2.95203e-05	7.99349e-05	0
BAG6_HUMAN	P46379	BAG6 BAT3 G3	BAG6	5.91462e-05	0	5.57629e-05	0.000135987	6.32577e-05	0	2.90593e-05
BAIP2_HUMAN	Q9UQB8	BAIAP2	BAIAP2	0	0	0	0	2.46809e-05	0	0
BAK_HUMAN	Q16611	BAK1 BAK BCL2L7 CDN1	BAK1	0.000102519	0	0.000480854	0.000492509	0	0.000248322	0
BAF_HUMAN	O75531	BANF1 BAF BCRG1	BANF1	0.00017596	0	0.000539934	0.000485473	0.00165609	0.00138648	0.000691612
BASP1_HUMAN	P80723	BASP1 NAP22	BASP1	0.000715452	0.000274177	0	0.00169342	0.000785496	0.000124161	0.000100234
BAX_HUMAN	Q07812	BAX BCL2L4	BAX	0.000238109	0	0.000947969	0.00100177	0.000430153	0.000437029	0.00016467
BAZ1A_HUMAN	Q9NRL2	BAZ1A ACF1 WCRF180 HSPC317	BAZ1A	0	0	0	0	1.68216e-05	0	0
BAZ1B_HUMAN	Q9UIG0	BAZ1B WBSC10 WBSCR10 WBSCR9 WSTF	BAZ1B	0	0	2.58705e-05	0	0	0	0
BBOF1_HUMAN	Q8ND07	BBOF1 C14orf45 CCDC176	BBOF1	1.89204e-05	0	0	0	0	0	0
BCAM_HUMAN	P50895	BCAM LU MSK19	BCAM	0.000197719	0.000432955	0.000531096	0.000203268	0.000146059	0.00178081	0.000275268
BAP29_HUMAN	Q9UHQ4	BCAP29 BAP29	BCAP29	0.000125686	0	0	0	0	0	0
BAP31_HUMAN	P51572	BCAP31 BAP31 DXS1357E	BCAP31	0.000566218	0.000360348	0.000460004	0.000653383	0.00029573	0.000262181	0
BCAR1_HUMAN	P56945	BCAR1 CAS CASS1 CRKAS	BCAR1	1.89204e-05	0	0	0	0	0	0
SPF27_HUMAN	O75934	BCAS2 DAM1	BCAS2	4.5118e-05	0	0.000340296	0.00012448	5.79051e-05	0.000109835	0
BCAT1_HUMAN	P54687	BCAT1 BCT1 ECA39	BCAT1	0.000116286	5.86612e-05	0.000411521	0.000188168	0.00014005	0.000526483	0
BCAT2_HUMAN	O15382	BCAT2 BCATM BCT2 ECA40	BCAT2	0.000106642	0	0	0.000367783	0	0	5.23948e-05
BCCIP_HUMAN	Q9P287	BCCIP TOK1	BCCIP	4.88778e-05	0	6.14424e-05	0	4.18204e-05	0	0
CHLE_HUMAN	P06276	BCHE CHE1	BCHE	0	0	6.31378e-05	2.37977e-05	4.42804e-05	0	6.78051e-05
ODBA_HUMAN	P12694	BCKDHA	BCKDHA	3.5192e-05	0	0	0	0	0	0
ODBB_HUMAN	P21953	BCKDHB	BCKDHB	2.72806e-05	0	0	0	0	0	0
BCKD_HUMAN	O14874	BCKDK	BCKDK	3.82522e-05	5.48355e-05	0	0	0	0	0
BCL10_HUMAN	O95999	BCL10 CIPER CLAP	BCL10	4.5118e-05	0	0	0	0	0	0
BCL2_HUMAN	P10415	BCL2	BCL2	0.00847951	0	0	0	0	0	0
B2CL1_HUMAN	Q07817	BCL2L1 BCL2L BCLX	BCL2L1	4.5118e-05	0	0.000170148	0	0	0	0
B2L12_HUMAN	Q9HB09	BCL2L12 BPR	BCL2L12	0	0	5.97818e-05	0.000174945	0	0.000540269	0
B2L13_HUMAN	Q9BXK5	BCL2L13 MIL1 CD003	BCL2L13	5.53333e-05	0	0	0.000519059	0	0	0
BCL9L_HUMAN	Q86UU0	BCL9L DLNB11	BCL9L	0	0	0	5.15364e-05	0	0	0
BCLF1_HUMAN	Q9NYF8	BCLAF1 BTF KIAA0164	BCLAF1	4.42667e-05	0	6.26017e-05	0	4.9711e-05	0	6.52464e-05
BCDO2_HUMAN	Q9BYV7	BCO2 BCDO2	BCO2	0	0	0	7.35565e-05	0	0	0
BDH2_HUMAN	Q9BUT1	BDH2 DHRS6 SDR15C1 UNQ6308/PRO20933	BDH2	6.51704e-05	0	0.000163846	5.9935e-05	0	0.000226482	0
BKRB2_HUMAN	P30411	BDKRB2 BKR2	BDKRB2	2.66606e-05	0	0	0	0	0	0
BEND5_HUMAN	Q7L4P6	BEND5 C1orf165	BEND5	3.66583e-05	0	0	0	0	0	0
BET1_HUMAN	O15155	BET1	BET1	0.00022559	0	0	0	0	0	0
BET1L_HUMAN	Q9NYM9	BET1L GS15	BET1L	0.000146633	0	0.000184327	0	0	0.000475951	0
BICC1_HUMAN	Q9H694	BICC1	BICC1	1.11721e-05	0	0	0	0	0	0
BICD2_HUMAN	Q8TD16	BICD2 KIAA0699	BICD2	5.61575e-05	0	0	0	0	0	0
BID_HUMAN	P55957	BID	BID	0.000186624	0	0.000301626	0.000294226	6.84334e-05	0.00025961	0
BIN1_HUMAN	O00499	BIN1 AMPHL	BIN1	0	0	0	4.97921e-05	0.000231621	0	3.54673e-05
BLMH_HUMAN	Q13867	BLMH	BLMH	0.000300248	0	8.34689e-05	0.000136114	0.000184641	0.000284733	0.000434976
BL1S1_HUMAN	P78537	BLOC1S1 BLOS1 GCN5L1 RT14	BLOC1S1	6.90039e-05	0	0	0	0	0	0
BIEA_HUMAN	P53004	BLVRA BLVR BVR	BLVRA	7.12738e-05	0	0	0.000245188	9.12445e-05	0	0
BLVRB_HUMAN	P30043	BLVRB FLR	BLVRB	7.99818e-05	0	0	0.00022067	0	0	0
SEC20_HUMAN	Q12981	BNIP1 NIP1 SEC20L TRG8	BNIP1	6.76769e-05	0	0	0	0	0	0
BNIP3_HUMAN	Q12983	BNIP3 NIP3	BNIP3	0.000104738	9.00869e-05	0	0.000115589	0	0	0
BNI3L_HUMAN	O60238	BNIP3L BNIP3A BNIP3H NIX	BNIP3L	9.77556e-05	0	0	0	0	0	0
BOC_HUMAN	Q9BWV1	BOC UNQ604/PRO1190	BOC	0	0	0	0	0	0.000354013	0
BD1L1_HUMAN	Q8NFC6	BOD1L1 BOD1L FAM44A KIAA1327	BOD1L1	3.55475e-06	0	0	0	0	0	0
BOLA2_HUMAN	Q9H3K6	BOLA2 BOLA2A My016; BOLA2B	BOLA2; BOLA2B	0.00017596	0	0.000442385	0.000323649	0.000301107	0.000876892	0.000345806
BOLA3_HUMAN	Q53S33	BOLA3	BOLA3	0	0	0.000184327	0.000269707	0	0.000713927	0
BOP1_HUMAN	Q14137	BOP1 KIAA0124	BOP1	0	0	0	0	6.27306e-05	0	0
BPHL_HUMAN	Q86WA6	BPHL MCNAA	BPHL	0	0	0	0	4.56222e-05	0	0
BPI_HUMAN	P17213	BPI	BPI	4.36655e-05	0	0	0	0	0	0
BPIA1_HUMAN	Q9NP55	BPIFA1 LUNX NASG PLUNC SPLUNC1 SPURT UNQ787/PRO1606	BPIFA1	0.000261993	0	0	0	0	0	0.000128076
BPIB1_HUMAN	Q8TDL5	BPIFB1 C20orf114 LPLUNC1 UNQ706/PRO1357	BPIFB1	0.000317415	0	0	0	0	0	0.000332506
BPIB2_HUMAN	Q8N4F0	BPIFB2 BPIL1 C20orf184 LPLUNC2 UNQ2489/PRO5776	BPIFB2	0	0	0	0	0	0	0.000141145
BPNT1_HUMAN	O95861	BPNT1	BPNT1	0.000124416	0	0	0.000147113	0	0.000247072	0
IMPA3_HUMAN	Q9NX62	BPNT2 IMPA3 IMPAD1	BPNT2	0.000128061	0	0.000170148	0	9.65086e-05	7.32232e-05	0
BRCC3_HUMAN	P46736	BRCC3 BRCC36 C6.1A CXorf53	BRCC3	3.25852e-05	0	0	0	8.36408e-05	0	0
BRD2_HUMAN	P25440	BRD2 KIAA9001 RING3	BRD2	1.99955e-05	0	0	0	0	0	0
BRD4_HUMAN	O60885	BRD4 HUNK1	BRD4	1.92939e-05	0	0	0	0	0	0
BRD8_HUMAN	Q9H0E9	BRD8 SMAP SMAP2	BRD8	0	0	8.19232e-05	0	0	0	0
BRI3B_HUMAN	Q8WY22	BRI3BP KG19	BRI3BP	0	0	0.000236992	5.77944e-05	0	0	0
BRK1_HUMAN	Q8WUW1	BRK1 C3orf10 HSPC300 MDS027	BRK1	0.000130341	0.000560541	0	0	0.000167282	0	0.000256153
BROX_HUMAN	Q5VW32	BROX BROFTI C1orf58	BROX	2.55015e-05	0	0	0	0	0	0
BASI_HUMAN	P35613	BSG UNQ6505/PRO21383	BSG	0.000805171	0.00180174	0.00133201	0.00152012	0.000250922	0.00375871	0.000494009
BST1_HUMAN	Q10588	BST1	BST1	9.81655e-05	0.000245236	6.14424e-05	0.00056805	0	0	0
BST2_HUMAN	Q10589	BST2	BST2	0	0	0.000552982	0.000357298	0.000112915	0.000224268	0
BTF3_HUMAN	P20290	BTF3 NACB OK/SW-cl.8	BTF3	0.000306999	0.000114656	0.000402169	0.000441339	0.000444817	0.00025961	0.00010479
BT3L4_HUMAN	Q96K17	BTF3L4	BTF3L4	0.000103506	0	0	0.000285572	8.85608e-05	0	0
BTK_HUMAN	Q06187	BTK AGMX1 ATK BPK	BTK	0	4.97849e-05	5.82086e-05	6.3878e-05	0	7.51502e-05	0
BT2A1_HUMAN	Q7KYR7	BTN2A1 BT2.1 BTF1	BTN2A1	2.93267e-05	0.000420405	0.000214669	0.000208245	0	0.000809117	0
BT3A2_HUMAN	P78410	BTN3A2 BT3.2 BTF3 BTF4	BTN3A2	0	0	0	8.99024e-05	0	0.000793252	0
BT3A3_HUMAN	O00478	BTN3A3 BTF3	BTN3A3	5.4414e-05	3.88067e-05	0	4.97921e-05	0	0.000527207	0
BUB3_HUMAN	O43684	BUB3	BUB3	0.0001827	0.000374956	0.000467675	0.000349891	0.000183105	0.000435405	0.000186922
BUD23_HUMAN	O43709	BUD23 MERM1 WBSCR22 HUSSY-03 PP3381	BUD23	3.66583e-05	0	0	0	0	0	0
BUD31_HUMAN	P41223	BUD31 EDG2	BUD31	6.90039e-05	0	0	0	8.85608e-05	0	0
BYST_HUMAN	Q13895	BYSL ENP1	BYSL	2.34613e-05	0	0	0	3.01107e-05	0	0
BZW1_HUMAN	Q7L1Q6	BZW1 BZAP45 KIAA0005	BZW1	0.000220442	0.000105101	0.000201931	0.000707982	0.000141144	0.000297258	9.60572e-05
BZW2_HUMAN	Q9Y6E2	BZW2 HSPC028 MSTP017	BZW2	0.000251544	5.25507e-05	0.000181609	8.80116e-05	0.000156826	0.000212327	4.80286e-05
CK054_HUMAN	Q9H0W9	C11orf54 LP4947 PTD012	C11orf54	0	0	0	0	4.30153e-05	0	0
CK068_HUMAN	Q9H3H3	C11orf68 BLES03	C11orf68	3.78409e-05	0.000122053	0	0.000179805	0	0	0
CK098_HUMAN	E9PRG8	C11orf98	C11orf98	8.37905e-05	0	0	0	0.000161307	0	0
C10_HUMAN	Q99622	C12orf57 C10	C12orf57	9.02359e-05	0	0.000340296	0.000373441	0.00011581	0.000439339	0
NJMU_HUMAN	Q9HAS0	C17orf75	C17orf75	0	0	0	0.000107883	0	0	0
CR032_HUMAN	Q8TCD1	C18orf32	C18orf32	0	0	0.00024577	0.000719219	0	0	0
C1GLT_HUMAN	Q9NS00	C1GALT1	C1GALT1	2.79302e-05	0	0	0	0	0	0
CA198_HUMAN	Q9H425	C1orf198	C1orf198	0	7.00676e-05	0	0	0.000146371	0	0
CA021_HUMAN	Q9H246	C1orf21 PIG13	C1orf21	0	0	0	0	0.000322614	0.000611937	0
C1QBP_HUMAN	Q07021	C1QBP GC1QBP HABP1 SF2P32	C1QBP	0.000236981	0.000162738	0.000245525	0.000261007	0.000461373	0	0
C1QT3_HUMAN	Q9BXJ4	C1QTNF3 CTRP3 UNQ753/PRO1484	C1QTNF3	8.73311e-05	0	0	0	0	0	0
CT027_HUMAN	Q9GZN8	C20orf27	C20orf27	6.17404e-05	0	0	0	0.000158477	0	0
C2CD2_HUMAN	Q9Y426	C2CD2 C21orf25 C21orf258 TMEM24L	C2CD2	1.54351e-05	0	0	0	0	0	0
C2CD5_HUMAN	Q86YS7	C2CD5 CDP138 KIAA0528	C2CD5	0	0	4.02169e-05	0	0	0	0
CB016_HUMAN	Q68DN1	C2orf16	C2orf16	0	0	0	0	0	0	1.02918e-05
ASHWN_HUMAN	Q9BVC5	C2orf49	C2orf49	0	0.000145525	0.000170148	0	0	0	0
CO3_HUMAN	P01024	C3 CPAMD1	C3	5.67419e-05	0	1.18285e-05	6.0576e-05	0	0	8.01333e-05
CC020_HUMAN	Q8ND61	C3orf20	C3orf20	1.74218e-05	0	0	0	0	0	0
CO4A_HUMAN	P0C0L4	C4A CO4 CPAMD2	C4A	0.000100686	0.000228718	0.000194833	4.41305e-05	0	4.22454e-05	0
CD003_HUMAN	Q8WVX3	C4orf3	C4orf3	0.000146633	0	0	0	0	0	0
CG050_HUMAN	Q9BRJ6	C7orf50 FP15621	C7orf50	7.99818e-05	0	0	0.000147113	6.84334e-05	0	0
CH033_HUMAN	Q9H7E9	C8orf33	C8orf33	0	0	0	0	6.02214e-05	0	0
CH082_HUMAN	Q6P1X6	C8orf82	C8orf82	7.33167e-05	0.000105101	0	0.000404561	0.000282288	0	9.60572e-05
TLS1_HUMAN	Q9NZ63	C9orf78 HCA59	C9orf78	0	7.41892e-05	0.00019517	0	0	0	0
CAH12_HUMAN	O43570	CA12	CA12	0.000105729	0	0	0.00027255	0	0	0
CAH14_HUMAN	Q9ULX7	CA14 UNQ690/PRO1335	CA14	0	0	0.000232834	0	0	0.000214562	0
CAH3_HUMAN	P07451	CA3	CA3	0	0	0.000147462	0	0	0.000271779	0
CAB39_HUMAN	Q9Y376	CAB39 MO25 CGI-66	CAB39	0	9.45912e-05	0	0	0	0	0
CAHD1_HUMAN	Q5VU97	CACHD1 KIAA1573 VWCD1	CACHD1	1.66052e-05	0	6.23078e-05	0	0	4.30635e-05	0
CA2D1_HUMAN	P54289	CACNA2D1 CACNL2A CCHL2A MHS3	CACNA2D1	0.000431066	0.000242154	0.000361165	0.000475531	0.000445638	0.0011912	0.000193651
CA2D2_HUMAN	Q9NY47	CACNA2D2 KIAA0558	CACNA2D2	0	0	0	0	4.05336e-05	8.78679e-05	0
CATIN_HUMAN	Q8WUQ7	CACTIN C19orf29	CACTIN	1.31805e-05	0	0	0	0	0	0
CYBP_HUMAN	Q9HB71	CACYBP S100A6BP SIP PNAS-107	CACYBP	0.000271389	0.00029105	0.000575445	0.000497921	0.000810672	0.000611658	0.000399007
PYR1_HUMAN	P27708	CAD	CAD	2.18206e-05	0	0	3.99566e-05	0.000123912	8.38823e-05	7.58971e-05
CADM1_HUMAN	Q9BY67	CADM1 IGSF4 IGSF4A NECL2 SYNCAM TSLC1	CADM1	0	0	4.51414e-05	3.30254e-05	9.21755e-05	0.000466238	0
CADM2_HUMAN	Q8N3J6	CADM2 IGSF4D NECL3	CADM2	0	0	0.00105988	0	0	0	0.00103262
CADM3_HUMAN	Q8N126	CADM3 IGSF4B NECL1 SYNCAM3 TSLL1 UNQ225/PRO258	CADM3	0	0	0	0.000150534	0	0	0
CADM4_HUMAN	Q8NFZ8	CADM4 IGSF4C NECL4 TSLL2	CADM4	8.22537e-05	0.000351967	0.000411521	0	0.000122543	0.000469576	0
CALB2_HUMAN	P22676	CALB2 CAB29	CALB2	0	0	0	0.00020228	0	0	0
CACO2_HUMAN	Q13137	CALCOCO2 NDP52	CALCOCO2	4.5345e-05	0	0.000101324	0.00012448	0	0	0.000133002
CALD1_HUMAN	Q05682	CALD1 CAD CDM	CALD1	0.0011607	0.00435323	0.000823292	0.00274656	0.000299488	0.000901339	0.000235495
CAHM2_HUMAN	Q9HA72	CALHM2 FAM26B	CALHM2	0.000130997	0	0	0	0	0	0
CALM1_HUMAN	P0DP23	CALM1 CALM CAM CAM1	CALM1	0.00272004	0.0020773	0.00145409	0.00236227	0.000398524	0.00207545	0.000339025
CALL3_HUMAN	P27482	CALML3	CALML3	0.000277405	0	0.000130113	0.000285572	0	0.000503948	0
CALL5_HUMAN	Q9NZT1	CALML5 CLSP	CALML5	0.0015474	0	0	0.000792105	0.000141144	0.00124937	0.000144086
CALR_HUMAN	P27797	CALR CRTC	CALR	0.00171423	0.000499231	0.00135113	0.00152829	0.00103505	0.00070499	0.000792472
CALU_HUMAN	O43852	CALU	CALU	0.000603582	0.000511304	0.00104962	0.00103564	0.000345866	0.000220361	0.000186922
KCC2D_HUMAN	Q13557	CAMK2D CAMKD	CAMK2D	0.000120712	4.50434e-05	0	0	5.37691e-05	0	0
KCC2G_HUMAN	Q13555	CAMK2G CAMK CAMK-II CAMKG	CAMK2G	6.51704e-05	6.00579e-05	0	6.70565e-05	0	0	0
CAMP_HUMAN	P49913	CAMP CAP18 FALL39 HSD26	CAMP	0.000124102	0	0	0	0	0	0
CAND1_HUMAN	Q86VP6	CAND1 KIAA0829 TIP120 TIP120A	CAND1	0.000211737	7.41892e-05	0.00011289	0.000345067	0.000376383	0.000269855	0.000211891
CANT1_HUMAN	Q8WVQ1	CANT1 SHAPY	CANT1	3.91022e-05	0	9.83079e-05	0.000251727	0	0	0
CALX_HUMAN	P27824	CANX	CANX	0.000717305	0.000185473	0.000649561	0.000945272	0.000354243	0.00047961	0.000372928
CAP1_HUMAN	Q01518	CAP1 CAP	CAP1	0.000711856	0.000266796	0.000205157	0.000429622	0.000318478	0.000705579	0.000487675
CAP2_HUMAN	P40123	CAP2	CAP2	0	0	4.17345e-05	6.10658e-05	0.000156235	0	6.52464e-05
CAPG_HUMAN	P40121	CAPG AFCP MCP	CAPG	0.000170097	0	0	0.000255512	0	0.00022545	0
CAN1_HUMAN	P07384	CAPN1 CANPL1 PIG30	CAPN1	0.000265303	9.22841e-05	9.28203e-05	0.000124433	0.000137701	3.48257e-05	8.43429e-05
CAN2_HUMAN	P17655	CAPN2 CANPL2	CAPN2	0.00027971	9.45912e-05	2.76491e-05	9.72017e-05	3.76383e-05	0.000107089	7.20429e-05
CAN5_HUMAN	O15484	CAPN5 NCL3	CAPN5	2.41041e-05	0	0	0	3.09356e-05	0	0
CPNS1_HUMAN	P04632	CAPNS1 CAPN4 CAPNS	CAPNS1	0.000220582	0.000225217	0.000230002	0.000219925	0.000134423	0.000313176	8.23348e-05
CAPR1_HUMAN	Q14444	CAPRIN1 GPIAP1 GPIP137 M11S1 RNG105	CAPRIN1	0.000199914	0.000436575	0.000401991	0.000222429	0.000347431	0.000156795	0.000192114
CAZA1_HUMAN	P52907	CAPZA1	CAPZA1	0.00128454	0.00133765	0.000776659	0.0010058	0.000729956	0.000710638	0.000698598
CAZA2_HUMAN	P47755	CAPZA2	CAPZA2	0.000856628	0.000764374	0.00058546	0.000668729	0.000524656	0.000451029	0.000419159
CAPZB_HUMAN	P47756	CAPZB	CAPZB	0.00193712	0.00227833	0.00120237	0.00159986	0.000971312	0.000861625	0.00115269
CAR10_HUMAN	Q9BWT7	CARD10 CARMA3	CARD10	0	0	0	0	0	0.000105431	0
CAR19_HUMAN	Q96LW7	CARD19 C9orf89	CARD19	0.000112795	0	0	0	0	0	0
CHSP1_HUMAN	Q9Y2V2	CARHSP1	CARHSP1	7.33167e-05	0	0	0	0	0.000254793	0
CARM1_HUMAN	Q86X55	CARM1 PRMT4	CARM1	6.22081e-05	0	0	7.35565e-05	9.12445e-05	0	0
SYCC_HUMAN	P49589	CARS1 CARS	CARS1	7.25583e-05	0	0	3.80763e-05	1.77122e-05	0	0
SYCM_HUMAN	Q9HA77	CARS2 OK/SW-cl.10	CARS2	0.000104062	0	0	0.000130504	8.49898e-05	0	0
CASC3_HUMAN	O15234	CASC3 MLN51	CASC3	0	0	0	0	8.91434e-05	0	3.03339e-05
CSKP_HUMAN	O14936	CASK LIN2	CASK	1.11721e-05	0	0.00021066	6.03508e-05	0.000501845	0.000135889	0.000120758
CSKI1_HUMAN	Q8WXD9	CASKIN1 KIAA1306	CASKIN1	0	0	0	0	0	2.71779e-05	0
CASPE_HUMAN	P31944	CASP14	CASP14	0.00118871	0.000270261	0.00118951	0.00118784	0.000403268	0.00106332	0.00135852
CASP3_HUMAN	P42574	CASP3 CPP32	CASP3	8.2758e-05	0	0.000138245	0.00015171	0.000376383	0.000152939	0.000144086
CASP7_HUMAN	P55210	CASP7 MCH3	CASP7	3.4502e-05	0	0	0	0	0	6.78051e-05
CASS4_HUMAN	Q9NQ75	CASS4 C20orf32 HEFL	CASS4	0	0	5.08489e-05	5.58015e-05	0	6.56484e-05	0
ICAL_HUMAN	P20810	CAST	CAST	0.000122069	0	0	0.000798614	0	0.000111261	0
CATA_HUMAN	P04040	CAT	CAT	0.000583761	0.000273264	0.000470552	0.000614654	0.000263468	0.000299109	0.000326595
CAV1_HUMAN	Q03135	CAV1 CAV	CAV1	0.000896972	0.00182876	0.00091071	0.000721403	0	0.00671091	0
CAV2_HUMAN	P51636	CAV2	CAV2	0.000162926	0.000140135	0	0	0	0	0
CAV3_HUMAN	P56539	CAV3	CAV3	0	0	0.00117102	0.000190382	0	0.00117588	0
CAVN1_HUMAN	Q6NZI2	CAVIN1 PTRF FKSG13	CAVIN1	0.00155305	0.00164251	0.000720162	0.00113616	0	0	0
CAVN2_HUMAN	O95810	CAVIN2 SDPR	CAVIN2	0	0.000348847	0.00112949	0.000179768	0	0	0
CAVN3_HUMAN	Q969G5	CAVIN3 PRKCDBP SRBC	CAVIN3	0.000557009	0.000675652	0	0.000313007	0	0	0
CAVN4_HUMAN	Q5BKX8	CAVIN4 MURC	CAVIN4	0	0.000120116	0	0	0	0	0
CBARP_HUMAN	Q8N350	CBARP C19orf26	CBARP	4.77961e-05	5.11304e-05	0	0	0	0	0
PEBB_HUMAN	Q13951	CBFB	CBFB	9.35804e-05	0.000171984	0.000396238	0.000294226	0.000136867	0	0.000261974
CBR1_HUMAN	P16152	CBR1 CBR CRN SDR21C1	CBR1	0.00031331	0	0	0.000809122	0.000175646	0	7.68458e-05
CBR3_HUMAN	O75828	CBR3	CBR3	7.56817e-05	0	0	0	0	0	0
CBSL_HUMAN	P0DN79	CBSL	CBSL	4.827e-05	0	0	0	4.93618e-05	0	0
CBX1_HUMAN	P83916	CBX1 CBX	CBX1	0.000139651	0.000240232	0.000408893	0.000385296	0.00017923	0.00067993	0.000219559
CBX3_HUMAN	Q13185	CBX3	CBX3	0.000237687	0.000840811	0.00122668	0.000698813	0.000322614	0.00101004	0.000603788
CBX5_HUMAN	P45973	CBX5 HP1A	CBX5	0.000106642	0.000458624	0.00107334	0.00030236	0.000171083	0.000417164	0.000628738
CCAR1_HUMAN	Q8IX12	CCAR1 CARP1 DIS	CCAR1	7.49704e-05	2.84485e-05	0.000149679	3.65017e-05	6.79188e-05	4.59776e-05	3.46673e-05
CCAR2_HUMAN	Q8N163	CCAR2 DBC1 KIAA1967	CCAR2	8.27708e-05	6.12241e-05	0.000106108	9.42666e-05	0.000438505	7.91589e-05	0.000223823
C102A_HUMAN	Q96A19	CCDC102A	CCDC102A	0	0	0	0	0.000322614	0	0
CC115_HUMAN	Q96NT0	CCDC115	CCDC115	0	0.000126122	0	0	0	0	0
CCD12_HUMAN	Q8WUD4	CCDC12	CCDC12	0	0.000265519	0.000931338	0.000196343	7.92386e-05	0.000300601	0
CC124_HUMAN	Q96CT7	CCDC124	CCDC124	0.00015814	0	0.000425371	0	0.000463241	0.000235193	0.000133002
CC127_HUMAN	Q96BQ5	CCDC127	CCDC127	3.78409e-05	0	0	0	0	0	0
CC134_HUMAN	Q9H6E4	CCDC134	CCDC134	8.68938e-05	0	0.000327693	5.9935e-05	5.57605e-05	0	0
CC137_HUMAN	Q6PK04	CCDC137 cPERP-B	CCDC137	5.33212e-05	0	0	0	0	0	0
CC148_HUMAN	Q8NFR7	CCDC148	CCDC148	0	3.55272e-05	0	0	0	0	0
CC167_HUMAN	Q9P0B6	CCDC167 C6orf129 HSPC265	CCDC167	0.000106642	0	0.000402169	0	0	0	0
CC170_HUMAN	Q8IYT3	CCDC170 C6orf97	CCDC170	2.86114e-05	0	0	0	0	0	0
CCD18_HUMAN	Q5T9S5	CCDC18	CCDC18	0	0	0	0	0	2.41224e-05	0
CCD22_HUMAN	O60826	CCDC22 CXorf37 JM1	CCDC22	2.47831e-05	0	0	0	0	0	0
CCD25_HUMAN	Q86WR0	CCDC25	CCDC25	0	0	0	0	6.27306e-05	0	0
CCD43_HUMAN	Q96MW1	CCDC43	CCDC43	0	0	0	0.000129459	0	0	0
CCD47_HUMAN	Q96A33	CCDC47 GK001 MSTP041 PSEC0077	CCDC47	0.000173134	0.000247739	0.000118496	0.000115589	0.00012098	0.00010199	0
CCD50_HUMAN	Q8IVM0	CCDC50 C3orf6	CCDC50	0.000146633	7.00676e-05	0	8.99024e-05	0	0	0
CCD58_HUMAN	Q4VC31	CCDC58	CCDC58	0.000241514	0	0.000512778	0.000761526	0	0.000167983	0
CCDC6_HUMAN	Q16204	CCDC6 D10S170 TST1	CCDC6	7.74667e-05	0	7.85451e-05	0	7.10157e-05	0	0
CCD60_HUMAN	Q8IWA6	CCDC60	CCDC60	2.79302e-05	0	0	0	0	0	0
CCD61_HUMAN	Q9Y6R9	CCDC61	CCDC61	0	0	0	0	2.64129e-05	0	0
CCDC8_HUMAN	Q9H0W5	CCDC8	CCDC8	0	0	0	0	0.000140346	0	5.86112e-05
CCD80_HUMAN	Q76M96	CCDC80 DRO1 URB HBE245	CCDC80	1.08617e-05	0	0	0	0	0	0
CC85B_HUMAN	Q15834	CCDC85B DIPA	CCDC85B	0	0	0	0	6.84334e-05	0	0
GRDN_HUMAN	Q3V6T2	CCDC88A APE GRDN KIAA1212	CCDC88A	0	0	0	0	2.43952e-05	0	0
CC88B_HUMAN	A6NC98	CCDC88B BRLZ	CCDC88B	0	0	2.52296e-05	0	0	0	0
CCDC9_HUMAN	Q9Y3X0	CCDC9	CCDC9	1.95511e-05	4.20405e-05	0	0	0	0	0
CC90B_HUMAN	Q9GZT6	CCDC90B CUA003 MDS011 MDS025	CCDC90B	0	0	0	0.000539415	0	0.000380761	0
CCD93_HUMAN	Q567U6	CCDC93	CCDC93	1.60694e-05	0	0	0	0	0	0
CCM2_HUMAN	Q9BSQ5	CCM2 C7orf22 PP10187	CCM2	4.81212e-05	0	0	0	0	0	0
CCN1_HUMAN	O00622	CCN1 CYR61 GIG1 IGFBP10	CCN1	6.98254e-05	0	5.26649e-05	0.000115589	0	6.7993e-05	0
CCN2_HUMAN	P29279	CCN2 CTGF HCS24 IGFBP8	CCN2	0.000185221	0.000232329	0	0	0	0.0001503	0
CCND1_HUMAN	P24385	CCND1 BCL1 PRAD1	CCND1	3.4502e-05	0	0	0	0	0	0
CCNK_HUMAN	O75909	CCNK CPR4	CCNK	1.83292e-05	0	0	0	0	0	0
CCNT1_HUMAN	O60563	CCNT1	CCNT1	0	0	0	0	2.78803e-05	0	0
CCNT2_HUMAN	O60583	CCNT2	CCNT2	0	0	0	0	1.85868e-05	0	0
CCNY_HUMAN	Q8ND76	CCNY C10orf9 CBCP1 CFP1	CCNY	6.046e-05	0	5.67161e-05	8.29869e-05	9.65086e-05	0	0
CCYL1_HUMAN	Q8N7R7	CCNYL1	CCNYL1	0	0	0	0.000157877	0	0	0
CCS_HUMAN	O14618	CCS	CCS	6.06759e-05	0	0	0.000111603	0	9.84726e-05	0
TCPB_HUMAN	P78371	CCT2 99D8.1 CCTB	CCT2	0.000855628	0.000531038	0.000844515	0.000353684	0.00125461	0.000711667	0.0006269
TCPG_HUMAN	P49368	CCT3 CCTG TRIC5	CCT3	0.000602069	0.000289459	0.000555578	0.0003714	0.000863831	0.000474516	0.000453516
TCPD_HUMAN	P50991	CCT4 CCTD SRB	CCT4	0.000699299	0.000500137	0.000720043	0.000359189	0.000908512	0.000745066	0.000755208
TCPE_HUMAN	P48643	CCT5 CCTE KIAA0098	CCT5	0.000533653	0.000399385	0.000573537	0.000134854	0.000752767	0.000581062	0.000345806
TCPZ_HUMAN	P40227	CCT6A CCT6 CCTZ	CCT6A	0.000694294	0.000369667	0.000790692	0.000222032	0.000687873	0.000593965	0.000516722
TCPH_HUMAN	Q99832	CCT7 CCTH NIP7-1	CCT7	0.00071722	0.000427531	0.000564513	0.000326827	0.000854837	0.000611519	0.000449352
TCPQ_HUMAN	P50990	CCT8 C21orf112 CCTQ KIAA0002	CCT8	0.000862167	0.000609588	0.00110695	0.000450982	0.00122952	0.000910696	0.000614766
CCZ1B_HUMAN	P86790	CCZ1B C7orf28B	CCZ1B	0	0	0	0	4.03268e-05	0	0
CD109_HUMAN	Q6YHK3	CD109 CPAMD7	CD109	0.000403688	0.000443761	0.000136539	0.000509664	0	0.000373953	0
CD14_HUMAN	P08571	CD14	CD14	5.86533e-05	0	0	8.09122e-05	0	0.000152876	0
CD151_HUMAN	P48509	CD151 TSPAN24	CD151	0.000178476	0.0013513	0.000620329	0.00089248	8.06536e-05	0.0010417	0.000247004
OX2G_HUMAN	P41217	CD200 MOX1 MOX2 My033	CD200	0	0	0	0.000505263	0	0	0
CD248_HUMAN	Q9HCU0	CD248 CD164L1 TEM1	CD248	0.000530681	0.000529399	0	0.000182543	2.78803e-05	0	0
PD1L1_HUMAN	Q9NZQ7	CD274 B7H1 PDCD1L1 PDCD1LG1 PDL1	CD274	5.35001e-05	0.000458624	6.70281e-05	0.000128017	0	0.000519219	0
CD276_HUMAN	Q5ZPR3	CD276 B7H3 PSEC0249 UNQ309/PRO352	CD276	0.000211826	0.000154886	0.000539847	0.000387159	6.60322e-05	0.000916053	0.000182003
CD2AP_HUMAN	Q9Y5K6	CD2AP	CD2AP	2.48662e-05	0	0	0	0	4.02212e-05	0
CD2B2_HUMAN	O95400	CD2BP2 KIAA1178	CD2BP2	0	9.95697e-05	0.000232834	0	7.92386e-05	0.000107281	9.10016e-05
CD320_HUMAN	Q9NPF0	CD320 8D6A UNQ198/PRO224	CD320	0	0.000347922	0.00091528	0.000223206	0	9.84726e-05	0
CD36_HUMAN	P16671	CD36 GP3B GP4	CD36	0	0	0.00031418	0	8.52189e-05	0	0
TNR5_HUMAN	P25942	CD40 TNFRSF5	CD40	0.000266219	0	0	0	0	0	0
CD44_HUMAN	P16070	CD44 LHR MDU2 MDU3 MIC4	CD44	0.00096891	0.00163035	0.00159916	0.00135247	6.42606e-05	0.00227604	8.43429e-05
MCP_HUMAN	P15529	CD46 MCP MIC10	CD46	0.000140572	0.000515952	0.000597322	0.000322296	0	0.00111251	0.000130987
CD47_HUMAN	Q08722	CD47 MER6	CD47	9.24225e-05	0.000144139	0.000152403	0.000323649	0	0.000262217	0
DAF_HUMAN	P08174	CD55 CR DAF	CD55	5.72228e-05	0.000246091	0.000207842	0.000355224	0	0.00201989	0
LFA3_HUMAN	P19256	CD58 LFA3	CD58	0	9.00869e-05	0.000429826	0.00016213	0	0.000327772	0.000123502
CD59_HUMAN	P13987	CD59 MIC11 MIN1 MIN2 MIN3 MSK21	CD59	0.00216477	0.00441426	0.00198403	0.003183	0.000752767	0.00342331	0.000494009
CD63_HUMAN	P08962	CD63 MLA1 TSPAN30	CD63	0.000248603	0.000388067	0.000545454	0.000641403	0.00011581	0.000988514	0
CD70_HUMAN	P32970	CD70 CD27L CD27LG TNFSF7	CD70	0	0	0	0	0	0.00122387	0
CD81_HUMAN	P60033	CD81 TAPA1 TSPAN28	CD81	0.00104225	0.00087315	0.000925778	0.000822887	0.00011581	0.00197703	0
CD82_HUMAN	P27701	CD82 KAI1 SAR2 ST6 TSPAN27	CD82	0	0	0.000442385	0.000593356	5.01845e-05	0.000380761	0
CD9_HUMAN	P21926	CD9 MIC3 TSPAN29 GIG2	CD9	0.00024717	0.000554935	0.000658359	0.000915087	0	0.00095439	0.00018443
CD99_HUMAN	P14209	CD99 MIC2 MIC2X MIC2Y	CD99	0.000945424	0.00152674	0.00195849	0.000939131	0.000316954	0.0025012	0.000424674
C99L2_HUMAN	Q8TCZ2	CD99L2 MIC2L1 UNQ1964/PRO4486	CD99L2	0.000620906	0.000630608	0.000464664	0.000353158	0	0.00234576	0
CDC20_HUMAN	Q12834	CDC20	CDC20	0	0	0	0	0	0	0.000146706
MPIP2_HUMAN	P30305	CDC25B CDC25HU2	CDC25B	0	0	6.40444e-05	0	0	0	0
UB2R1_HUMAN	P49427	CDC34 UBCH3 UBE2R1	CDC34	0	0	0	0	8.36408e-05	0	0
CDC37_HUMAN	Q16543	CDC37 CDC37A	CDC37	0.000340795	0.000171984	0.000223254	0.000323843	0.0004106	0.000407876	0.000209579
CD37L_HUMAN	Q7L3B6	CDC37L1 CDC37B HARC	CDC37L1	0	0	0	0	3.86034e-05	0	0
CDC42_HUMAN	P60953	CDC42	CDC42	0.000867522	0.000360348	0.000464664	0.000521169	0.000215076	0.000563164	0.00010978
MRCKB_HUMAN	Q9Y5S2	CDC42BPB KIAA1124	CDC42BPB	2.1194e-05	1.95033e-05	0	0	1.16407e-05	0	0
MRCKG_HUMAN	Q6DT37	CDC42BPG DMPK2	CDC42BPG	0	0	0	0	0	3.32059e-05	0
BORG5_HUMAN	Q00587	CDC42EP1 BORG5 CEP1 MSE55	CDC42EP1	8.83489e-05	9.45912e-05	0	0	5.64575e-05	0	0
BORG1_HUMAN	O14613	CDC42EP2 BORG1 CEP2	CDC42EP2	8.02501e-05	0	0	0	0	0	0
CDC5L_HUMAN	Q99459	CDC5L KIAA0432 PCDC5RP	CDC5L	6.37536e-05	0	9.61707e-05	0	7.36402e-05	0	2.50584e-05
CDC73_HUMAN	Q6P1J9	CDC73 C1orf28 HRPT2	CDC73	1.92306e-05	6.2027e-05	0	0	7.40426e-05	0	0
CDCA3_HUMAN	Q99618	CDCA3 C8 GRCC8 TOME1	CDCA3	0	0	0.000152547	0	5.1915e-05	9.84726e-05	0
CDCP1_HUMAN	Q9H5V8	CDCP1 TRASK UNQ2486/PRO5773	CDCP1	0.000382895	0.000664512	0	0.000342154	0	0	0
CAD11_HUMAN	P55287	CDH11	CDH11	0.000495435	0.000200648	0.000197377	0.0003524	3.42167e-05	0.000138978	0
CAD12_HUMAN	P55289	CDH12	CDH12	2.67948e-05	0	0	0	0	0	0
CAD13_HUMAN	P55290	CDH13 CDHH	CDH13	6.41441e-05	0.000420405	0.000573812	0.000557768	0.000173715	0.00129706	0.000206892
CAD15_HUMAN	P55291	CDH15 CDH14 CDH3	CDH15	0	0.000113368	0.00072074	0	7.61225e-05	0.000183222	9.06607e-05
CADH2_HUMAN	P19022	CDH2 CDHN NCAD	CDH2	0.000235646	0.000668445	0.000565283	0.000538203	0.000180664	0.000507871	0
CADH4_HUMAN	P55283	CDH4	CDH4	0	0	6.63578e-05	0.000100674	9.78597e-05	5.71141e-05	6.91612e-05
CADH6_HUMAN	P55285	CDH6	CDH6	2.66606e-05	0.000157652	0	0.000168022	0	0	0
CDHR1_HUMAN	Q96JP9	CDHR1 KIAA1775 PCDH21 PRCAD	CDHR1	1.24794e-05	0	0	0	0	0	0
CDIPT_HUMAN	O14735	CDIPT PIS PIS1	CDIPT	9.77556e-05	0	0	0	0	0	0
CDK1_HUMAN	P06493	CDK1 CDC2 CDC28A CDKN1 P34CDC2	CDK1	0.000138008	0.000185473	0.00019517	9.51908e-05	0.000177122	0.000419658	0.000203415
CD11B_HUMAN	P21127	CDK11B CDC2L1 CDK11 PITSLREA PK58	CDK11B	1.89204e-05	0	0	0	0	0	0
CDK12_HUMAN	Q9NYV4	CDK12 CRK7 CRKRS KIAA0904	CDK12	2.14585e-05	0	0	0	0	0	0
CDK13_HUMAN	Q14004	CDK13 CDC2L CDC2L5 CHED KIAA1791	CDK13	1.4219e-05	0	0	0	0	0	0
CDK16_HUMAN	Q00536	CDK16 PCTAIRE1 PCTK1	CDK16	4.18952e-05	0	0	0	0	0	0
CDK2_HUMAN	P24941	CDK2 CDKN2	CDK2	0	0.000148378	0.000130113	0.000142786	0	0	0.000203415
CDK4_HUMAN	P11802	CDK4	CDK4	6.90039e-05	0	0.000325283	0	0.000974169	0.000779366	0.000576343
CDK5_HUMAN	Q00535	CDK5 CDKN5	CDK5	0	0	0	0.000256034	0	0	0
CK5P3_HUMAN	Q96JB5	CDK5RAP3 IC53 LZAP MSTP016 OK/SW-cl.114 PP1553	CDK5RAP3	7.2134e-05	0	3.88057e-05	0.000141951	0	0	0
CDK6_HUMAN	Q00534	CDK6 CDKN6	CDK6	0	0	0	0	0.000325521	0.000220361	0.00024923
CDK7_HUMAN	P50613	CDK7 CAK CAK1 CDKN7 MO15 STK1	CDK7	0	6.46778e-05	0	0	5.79051e-05	0	0
CDK9_HUMAN	P50750	CDK9 CDC2L4 TAK	CDK9	8.18419e-05	0	0.00010288	0.000112901	0.000227581	0	0.000107227
CDKAL_HUMAN	Q5VV42	CDKAL1	CDKAL1	0	0	3.40296e-05	4.97921e-05	0	0.000175736	0
CDN2A_HUMAN	P42771	CDKN2A CDKN2 MTS1	CDKN2A	6.90039e-05	0	0.00039034	0	0.000354243	0.000503948	0
CARF_HUMAN	Q9NXV6	CDKN2AIP CARF	CDKN2AIP	1.92306e-05	0	0	0	3.70213e-05	0	0
C2AIL_HUMAN	Q96HQ2	CDKN2AIPNL	CDKN2AIPNL	0.00027207	0	0.000680593	0.00012448	0.000289526	0	0.000177336
CDON_HUMAN	Q4KMG0	CDON CDO	CDON	0	6.35145e-05	6.97317e-05	0	0.000113727	0.000476919	0
CDR2L_HUMAN	Q86X02	CDR2L HUMPPA	CDR2L	2.21333e-05	0	0	0	0	0	0
CDSN_HUMAN	Q15517	CDSN	CDSN	0.000203882	0	8.50741e-05	0.00012448	5.79051e-05	0.000164752	0.000399007
CDV3_HUMAN	Q9UKY7	CDV3 H41	CDV3	8.71125e-05	0	8.19232e-05	0	0.000111521	0.000105767	0
CEBPB_HUMAN	P17676	CEBPB TCF5 PP9092	CEBPB	4.88778e-05	0	0	0	0	0	0
CEBPD_HUMAN	P49716	CEBPD	CEBPD	6.28429e-05	0	0	0	0	0	0
CELF1_HUMAN	Q92879	CELF1 BRUNOL2 CUGBP CUGBP1 NAB50	CELF1	6.76769e-05	0.000145525	0	6.22401e-05	4.34289e-05	0	0
CELF2_HUMAN	O95319	CELF2 BRUNOL3 CUGBP2 ETR3 NAPOR	CELF2	0	0	0.000122885	2.99675e-05	8.36408e-05	7.54941e-05	4.26921e-05
CEMIP_HUMAN	Q8WUJ3	CEMIP KIAA1199	CEMIP	0.000111173	0	0	0	0	0	0
CEIP2_HUMAN	Q9UHN6	CEMIP2 KIAA1412 TMEM2	CEMIP2	0.00022188	0.000614229	0.00043382	0.000411483	6.35453e-05	0.000378733	5.23948e-05
CEND_HUMAN	Q8N111	CEND1 BM88	CEND1	0.000234613	0	0.000589847	0.000431532	0	0	0
CE104_HUMAN	O60308	CEP104 KIAA0562	CEP104	0	0	0	4.06208e-05	0	0	0
CE128_HUMAN	Q6ZU80	CEP128 C14orf145 C14orf61	CEP128	0	0	0	0	0	0	9.9059e-05
CP131_HUMAN	Q9UPN4	CEP131 AZI1 KIAA1118	CEP131	1.4423e-05	0	0	5.19413e-05	0	0	0
CP135_HUMAN	Q66GS9	CEP135 CEP4 KIAA0635	CEP135	0	2.84485e-05	0	0	0	0	0
CE162_HUMAN	Q5TB80	CEP162 C6orf84 KIAA1009 QN1	CEP162	0	0	0	1.99783e-05	0	0	0
CE170_HUMAN	Q5SW79	CEP170 FAM68A KAB KIAA0470	CEP170	8.04389e-05	0	0	0	8.60305e-06	0	0
CE290_HUMAN	O15078	CEP290 BBS14 KIAA0373 NPHP6	CEP290	6.06759e-06	0	0	0	0	0	0
CEP55_HUMAN	Q53EZ4	CEP55 C10orf3 URCC6	CEP55	0	0	0	0	0.000125461	0	0
CEP89_HUMAN	Q96ST8	CEP89 CCDC123	CEP89	1.30341e-05	0	0	0	0	0	0
GT253_HUMAN	Q5T4B2	CERCAM CEECAM1 GLT25D3 KIAA1502	CERCAM	6.90039e-05	0	0	0	0	0	0
CERS2_HUMAN	Q96G23	CERS2 LASS2 TMSG1	CERS2	5.21363e-05	0	0	0	0	0	0
EST2_HUMAN	O00748	CES2 ICE	CES2	0	0	0	0.000104403	0	0	0
CETN2_HUMAN	P41208	CETN2 CALT CEN2	CETN2	0	0	0.000221193	0	0	0	0
CFA20_HUMAN	Q9Y6A4	CFAP20 BUG22 C16orf80 GTL3	CFAP20	0	0	0.000288512	0	6.5458e-05	0.000372483	0
CFA54_HUMAN	Q96N23	CFAP54 C12orf55 C12orf63	CFAP54	3.33258e-06	0	0	0	0	0	0
CFAB_HUMAN	P00751	CFB BF BFD	CFB	0	0	0	3.76336e-05	0	0	5.36133e-05
CFDP1_HUMAN	Q9UEE9	CFDP1 BCNT CENP-29	CFDP1	0	0	0	0	8.85608e-05	0	0
COF1_HUMAN	P23528	CFL1 CFL	CFL1	0.00505188	0.00504487	0.00387904	0.00354718	0.00340726	0.00521616	0.00224471
COF2_HUMAN	Q9Y281	CFL2	CFL2	0.00226222	0.00325261	0.00212952	0.00277931	0.00170363	0.00297307	0.00151669
CGBP1_HUMAN	Q9UFW8	CGGBP1 CGGBP	CGGBP1	0	0	0.000232834	0	7.92386e-05	0	0.000364006
CING_HUMAN	Q9P2M7	CGN KIAA1319	CGN	0	0	0	0	0	0	0.00033055
CGRE1_HUMAN	Q99674	CGREF1 CGR11	CGREF1	0	0	0	0.00020228	0	0	0
CAF1A_HUMAN	Q13111	CHAF1A CAF CAF1P150	CHAF1A	0	0	0	0	2.11056e-05	0	0
CAF1B_HUMAN	Q13112	CHAF1B CAF1A CAF1P60 MPHOSPH7 MPP7	CHAF1B	0	8.27027e-05	0.000301802	0	8.63831e-05	0.000140445	0
CHAP1_HUMAN	Q96JM3	CHAMP1 C13orf8 CAMP CHAMP KIAA1802 ZNF828	CHAMP1	0	0	4.97062e-05	0	0	0	0
CHCH1_HUMAN	Q96BP2	CHCHD1 C10orf34 MRPS37	CHCHD1	0	0	0	0	0.000231621	0	0
CHCH2_HUMAN	Q9Y6H1	CHCHD2 C7orf17 AAG10	CHCHD2	0	0	0.00165895	0	0.00023524	0.000356963	0
MIC19_HUMAN	Q9NX63	CHCHD3 MIC19 MINOS3	CHCHD3	0.000361852	0.000436575	0.00120848	0.000974898	0.000289526	0.000776411	0.000221671
MIA40_HUMAN	Q8N4Q1	CHCHD4 MIA40	CHCHD4	0	0	0	0.00020228	0	0	0
MIC25_HUMAN	Q9BRQ6	CHCHD6 CHCM1 MIC25	CHCHD6	9.04629e-05	0	0.000255222	0	0	0.000109835	0
CHD1_HUMAN	O14646	CHD1	CHD1	0	0	0	0	1.14635e-05	0	0
CHD3_HUMAN	Q12873	CHD3	CHD3	1.03874e-05	0	0	0	1.98969e-05	0	0
CHD4_HUMAN	Q14839	CHD4	CHD4	1.48385e-05	0	0	0	6.90612e-05	0	3.70129e-05
CHD5_HUMAN	Q8TDI0	CHD5 KIAA0444	CHD5	1.05208e-05	0	0	0	0	0	0
CHD6_HUMAN	Q8TD26	CHD6 CHD5 KIAA1335 RIGB	CHD6	0	0	0	0	9.87235e-06	0	0
CHD7_HUMAN	Q9P2D1	CHD7 KIAA1416	CHD7	0	0	0	0	2.68845e-05	0	0
CHD8_HUMAN	Q9HCK8	CHD8 HELSNF1 KIAA1564	CHD8	0	0	0	0	1.03473e-05	0	0
CHK1_HUMAN	O14757	CHEK1 CHK1	CHEK1	0	0	0	0	0	0	4.26921e-05
CHERP_HUMAN	Q8IWX8	CHERP DAN26 SCAF6	CHERP	1.12795e-05	0	0	0	3.61907e-05	0	0
CH3L1_HUMAN	P36222	CHI3L1	CHI3L1	5.48358e-05	0	0	0	0	0	0
CHID1_HUMAN	Q9BWS9	CHID1 GL008 PSEC0104 SB139	CHID1	0.000104273	0	4.91539e-05	7.19219e-05	0	0	0
NCHL1_HUMAN	O00533	CHL1 CALL	CHL1	0	0	0	9.58959e-05	0	0	0
CHM1A_HUMAN	Q9HD42	CHMP1A CHMP1 KIAA0047 PCOLN3 PRSM1	CHMP1A	0.000375127	0.000171984	0.000603253	0.00022067	6.84334e-05	0.000389414	0.00010479
CHM1B_HUMAN	Q7LBR1	CHMP1B C18orf2	CHMP1B	5.33212e-05	0	0	0.000147113	0	0	0
CHM2A_HUMAN	O43633	CHMP2A BC2 CHMP2	CHMP2A	7.0384e-05	0	0	0.000258919	0	0	0
CHM2B_HUMAN	Q9UQN3	CHMP2B CGI-84	CHMP2B	0	0	0	0	9.40959e-05	0.000118988	0.000144086
CHMP3_HUMAN	Q9Y3E7	CHMP3 CGI149 NEDF VPS24 CGI-149	CHMP3	0	0	0	0	6.02214e-05	0	0
CHM4B_HUMAN	Q9H444	CHMP4B C20orf178 SHAX1	CHMP4B	0.00010593	0	0.000176954	0.000323649	0.000301107	0.000138648	0.00018443
CHMP5_HUMAN	Q9NZZ3	CHMP5 C9orf83 SNF7DC2 CGI-34 HSPC177 PNAS-114 PNAS-2	CHMP5	9.38453e-05	0	0.000176954	0	6.02214e-05	0	9.22149e-05
CHMP6_HUMAN	Q96FZ7	CHMP6 VPS20	CHMP6	0.000127507	0	0.000384683	0.000140717	9.8187e-05	0	0.000100234
CHRD1_HUMAN	Q9UHD1	CHORDC1 CHP1	CHORDC1	0	0	0	0	0.000325521	0	6.23074e-05
CHP1_HUMAN	Q99653	CHP1 CHP	CHP1	0.000562422	0.00085992	0.00177417	0.00189585	0.000171083	0.00366205	0.000471554
CHSS2_HUMAN	Q8IZ52	CHPF CSS2 UNQ651/PRO1281	CHPF	3.4502e-05	0	0	0	0	0	0
CHPF2_HUMAN	Q9P2E5	CHPF2 CHSY3 CSGLCAT KIAA1402 UNQ299/PRO339	CHPF2	4.77411e-05	0	0	0	0	0	0
CHSTE_HUMAN	Q8NCH0	CHST14 D4ST1 UNQ1925/PRO4400	CHST14	5.45612e-05	0	0	0	0	0	0
CTF8_HUMAN	P0CG13	CHTF8 CTF8	CHTF8	0	0	0	9.51908e-05	0	0	0
CIAO1_HUMAN	O76071	CIAO1 CIA1 WDR39	CIAO1	3.08702e-05	0	0	0	0	0	0
CIA2B_HUMAN	Q9Y3D0	CIAO2B CIAB FAM96B MIP18 CGI-128 HSPC118	CIAO2B	6.51704e-05	0	0	0	0	0	0
CPIN1_HUMAN	Q6FI81	CIAPIN1 CUA001 PRO0915	CIAPIN1	3.4502e-05	0	6.50567e-05	0.000142786	0.000309963	0.000239805	0.000101708
CILK1_HUMAN	Q9UPZ9	CILK1 ICK KIAA0936	CILK1	0	0	9.34617e-05	0	0	0	0
CIRBP_HUMAN	Q14011	CIRBP A18HNRNP CIRP	CIRBP	0.000247738	0.000199139	0.000349252	0.000255512	0.000435812	0.000300601	0
CISD2_HUMAN	Q8N5K1	CISD2 CDGSH2 ERIS ZCD2	CISD2	0.000392203	0.000672649	0.00122733	0.000410526	0.000200738	0.00104675	0.000461075
CTRO_HUMAN	O14578	CIT CRIK KIAA0949 STK21	CIT	0	0	0	0	6.51746e-06	0	0
CKAP4_HUMAN	Q07065	CKAP4	CKAP4	0.00227547	0.00221668	0.00189142	0.00526015	0.000946661	0.00133795	0.000995502
CKAP5_HUMAN	Q14008	CKAP5 KIAA0097	CKAP5	5.1984e-05	0	1.95746e-05	3.58019e-05	7.32782e-05	0.00010823	3.57027e-05
KCRB_HUMAN	P12277	CKB CKBB	CKB	4.09209e-05	0	0	0	0.000577705	9.48065e-05	0.00024126
CLAP1_HUMAN	Q7Z460	CLASP1 KIAA0622 MAST1	CLASP1	1.38824e-05	0	0	0	2.67255e-05	0	0
CLAP2_HUMAN	O75122	CLASP2 KIAA0627	CLASP2	2.07991e-05	0	0	0	0	0	0
CLCC1_HUMAN	Q96S66	CLCC1 KIAA0761 MCLC	CLCC1	7.56817e-05	4.06844e-05	3.56762e-05	0.000234906	0	4.60598e-05	0
CLD11_HUMAN	O75508	CLDN11 OSP OTM	CLDN11	0.000266606	0	0	0	0	0	0
CLC14_HUMAN	Q86T13	CLEC14A C14orf27 EGFR5 UNQ236/PRO269	CLEC14A	0	0	0.000382834	0	0	0	0
CLGN_HUMAN	O14967	CLGN	CLGN	0	0	0	0	0	0	6.58678e-05
CLIC1_HUMAN	O00299	CLIC1 G6 NCC27	CLIC1	0.000707871	0.000467117	0.00051317	0.000654242	0.000446084	0.000460627	0.00021346
CLIC4_HUMAN	Q9Y696	CLIC4	CLIC4	0.000435454	0.000217451	0.000186184	0.000145674	0.000181702	0.00028115	7.94956e-05
EPN4_HUMAN	Q14677	CLINT1 ENTH EPN4 EPNR KIAA0171	CLINT1	8.22026e-05	0.000111284	0.000130113	0.000141785	0	0	0
CLIP1_HUMAN	P30622	CLIP1 CYLN1 RSN	CLIP1	6.15498e-05	0	0	0.000109881	0	1.76278e-05	0
CLIP2_HUMAN	Q9UDT6	CLIP2 CYLN2 KIAA0291 WBSCR3 WBSCR4 WSCR4	CLIP2	4.04506e-05	2.17451e-05	0	0	2.59575e-05	0	0
CLMP_HUMAN	Q9H6B4	CLMP ACAM ASAM UNQ318/PRO363	CLMP	0.000761297	0.000799796	0.000131691	0.000201711	0	6.96514e-05	0
ICLN_HUMAN	P54105	CLNS1A CLCI ICLN	CLNS1A	0	0	0	0	8.68577e-05	0	0
CLPB_HUMAN	Q9H078	CLPB HSP78 SKD3	CLPB	3.71224e-05	3.19295e-05	5.59982e-05	2.04841e-05	0	3.61482e-05	0
CLPP_HUMAN	Q16740	CLPP	CLPP	0.000117307	0	0	0.000269707	7.52767e-05	0	0
CLPT1_HUMAN	O96005	CLPTM1	CLPTM1	6.56768e-05	6.63798e-05	0.000116417	0.000149049	0	0	3.03339e-05
CLP1L_HUMAN	Q96KA5	CLPTM1L CRR9	CLPTM1L	3.78409e-05	0	0	0	0	0	0
CLPX_HUMAN	O76031	CLPX	CLPX	5.10029e-05	0	0	0	0	0	0
CLCA_HUMAN	P09496	CLTA	CLTA	0.00053452	0.000700676	0.000402367	0.000964652	0.000362443	0.000203872	0.000256153
CLCB_HUMAN	P09497	CLTB	CLTB	0.000400496	0.000403589	8.84771e-05	0.000924968	0	0	0
CLH1_HUMAN	Q00610	CLTC CLH17 CLTCL2 KIAA0034	CLTC	0.00064355	0.00095905	0.000236816	0.000433888	0.000494003	0.000268615	0.000366218
CLH2_HUMAN	P53675	CLTCL1 CLH22 CLTCL CLTD	CLTCL1	0.000122325	0	5.91424e-05	7.78834e-05	0	3.05423e-05	0
CLUS_HUMAN	P10909	CLU APOJ CLI KUB1 AAG4	CLU	3.38385e-05	0	0	3.11201e-05	0	0.000439339	0.000177336
CLU_HUMAN	O75153	CLUH KIAA0664	CLUH	1.59601e-05	0	0	3.30254e-05	3.07252e-05	0	0
NEUA_HUMAN	Q8NFW8	CMAS	CMAS	3.66583e-05	5.25507e-05	0	6.74268e-05	0	0	0
COXM1_HUMAN	Q7Z7K0	CMC1 C3orf68	CMC1	9.77556e-05	0.000210203	0.000368655	0.000134854	0.000188192	0	0
COXM2_HUMAN	Q9NRP2	CMC2 C16orf61 DC13	CMC2	0	0	0.000737309	0	0	0	0
CMC4_HUMAN	P56277	CMC4 C6.1B MTCP1 MTCP1NB	CMC4	0.000442114	0	0.00110596	0	0	0	0
KCY_HUMAN	P30085	CMPK1 CMK CMPK UCK UMK UMPK	CMPK1	0.000266606	0	0	0.000441339	0	0.000185304	0.00010479
CKLF6_HUMAN	Q9NX76	CMTM6 CKLFSF6	CMTM6	5.86533e-05	0	0.000110596	0	0	0.000142785	0
CNBP_HUMAN	P62633	CNBP RNF163 ZNF9	CNBP	0.000293733	0.000730178	0.000465669	0.000340683	0.000871625	0.00120214	0.000485342
CNDP2_HUMAN	Q96KP4	CNDP2 CN2 CPGL HEL-S-13 PEPA	CNDP2	0.000116478	0	0.000292141	0.000274796	0.000255657	0.000377169	0.00017399
CNN1_HUMAN	P51911	CNN1	CNN1	8.9137e-05	0	0	0	0	0	0
CNN2_HUMAN	Q99439	CNN2	CNN2	0.000354426	0.000185473	0.00019517	0.000481217	0.000332103	0.000239805	0.000474636
CNN3_HUMAN	Q15417	CNN3	CNN3	0.000130669	0.000245236	0.000368655	0.000494463	0.000271832	0.000322765	0.000608362
CNNM3_HUMAN	Q8NE01	CNNM3 ACDP3	CNNM3	0	0	0.000116417	0	0	3.75751e-05	0
CNOT1_HUMAN	A5YKK6	CNOT1 CDC39 KIAA1007 NOT1 AD-005	CNOT1	1.87056e-05	0	0	3.6365e-05	1.40968e-05	0	1.72687e-05
CNO10_HUMAN	Q9H9A5	CNOT10	CNOT10	1.43057e-05	0	0	0	0	0	0
CNOT3_HUMAN	O75175	CNOT3 KIAA0691 LENG2 NOT3	CNOT3	0	0	0	5.9204e-05	0	0	0
CNOT7_HUMAN	Q9UIV1	CNOT7 CAF1	CNOT7	0	0	0	0	4.56222e-05	0	0
CNOT9_HUMAN	Q92600	CNOT9 RCD1 RQCD1	CNOT9	6.90039e-05	0	0	9.51908e-05	8.85608e-05	0	0
CN37_HUMAN	P09543	CNP	CNP	0.000245065	0.000262753	0.000303544	0	0.000125461	0	9.60572e-05
CNPY2_HUMAN	Q9Y2B0	CNPY2 MSAP TMEM4 ZSIG9 UNQ1943/PRO4426	CNPY2	0.000531657	0.000120116	0.000408893	0	0	0.000135986	0
CNPY3_HUMAN	Q9BT09	CNPY3 CTG4A ERDA5 PRAT4A TNRC5 HSPC084 UNQ1934/PRO4409	CNPY3	5.67613e-05	0	0.000356762	0.000313208	0.00016998	0	0
CNPY4_HUMAN	Q8N129	CNPY4 PSEC0237 UNQ1909/PRO4354	CNPY4	9.44751e-05	0	0.00031599	0.000288972	0	0	0
CNR2_HUMAN	P34972	CNR2 CB2A CB2B	CNR2	5.89485e-05	0	0	0	0	0	0
CNRP1_HUMAN	Q96F85	CNRIP1 C2orf32	CNRIP1	0.000139382	0	0.000232834	0.000340683	0.000277335	0	0
CNST_HUMAN	Q6PJW8	CNST C1orf71	CNST	2.1995e-05	0	0	0	0	0	0
CNTFR_HUMAN	P26992	CNTFR	CNTFR	0	0	0	0	0.000110161	0	0
CNTN3_HUMAN	Q9P232	CNTN3 KIAA1496 PANG	CNTN3	0	0	0	0	1.33233e-05	0.000227446	0
CNTN6_HUMAN	Q9UQ52	CNTN6	CNTN6	0	0	0	0	1.98097e-05	0	0
CNTP1_HUMAN	P78357	CNTNAP1 CASPR NRXN4	CNTNAP1	7.54236e-05	0	0	7.26135e-05	0	0	0
CNTP2_HUMAN	Q9UHC6	CNTNAP2 CASPR2 KIAA0868	CNTNAP2	0	0	0	0	1.01725e-05	0	0
CNTP4_HUMAN	Q9C0A0	CNTNAP4 CASPR4 KIAA1763	CNTNAP4	7.31774e-05	0	0	0	0	0	0
CNTRL_HUMAN	Q7Z7A1	CNTRL CEP1 CEP110	CNTRL	4.36084e-06	0	0	0	0	0	0
COA3_HUMAN	Q9Y2R0	COA3 CCDC56 MITRAC12 HSPC009	COA3	0.000244389	0	0.000368655	0	0	0	0
COA4_HUMAN	Q9NYJ1	COA4 CHCHD8 E2IG2	COA4	0.00017596	0	0.000663578	0	0	0	0
COA5_HUMAN	Q86WW8	COA5 C2orf64	COA5	0	0	0	0	0	0.000509585	0
COA6_HUMAN	Q5JTJ3	COA6 C1orf31	COA6	0	0	0	0.000231178	0	0	0
COA7_HUMAN	Q96BR5	COA7 C1orf163 RESA1 SELRC1	COA7	4.5118e-05	0	0.000595519	0.000497921	8.68577e-05	0.000109835	0.000133002
COASY_HUMAN	Q13057	COASY PSEC0106	COASY	1.89204e-05	0	0	0	0	0	0
COBL_HUMAN	O75128	COBL KIAA0633	COBL	0	0	0	0	2.76753e-05	0	0
COBL1_HUMAN	Q53SF7	COBLL1 KIAA0977	COBLL1	0	0	0	3.67783e-05	0	0	0
COG1_HUMAN	Q8WTW3	COG1 KIAA1381 LDLB	COG1	1.07621e-05	0	0	0	0	0	0
COG4_HUMAN	Q9H9E3	COG4	COG4	1.31805e-05	0	0	0	0	0	0
COG5_HUMAN	Q9UP83	COG5 GOLTC1 GTC90	COG5	1.26136e-05	0	0	0	0	0	0
COG8_HUMAN	Q96MW5	COG8	COG8	1.7251e-05	0	0	0	0	0	0
COBA1_HUMAN	P12107	COL11A1 COLL6	COL11A1	6.48103e-06	4.87763e-05	4.59988e-05	0	0	0	0
COBA2_HUMAN	P13942	COL11A2	COL11A2	2.05634e-05	1.46653e-05	0	0	0	0	0
COCA1_HUMAN	Q99715	COL12A1 COL12A1L	COL12A1	0.000111365	2.27246e-05	2.28566e-05	5.34555e-05	0.000124331	0	0
COEA1_HUMAN	Q05707	COL14A1 UND	COL14A1	4.40366e-05	0	0.000218954	0	0	0.000121922	0
COFA1_HUMAN	P39059	COL15A1	COL15A1	1.66052e-05	0	5.86322e-05	0	0	0	0
COGA1_HUMAN	Q07092	COL16A1 FP1572	COL16A1	7.42447e-06	0	0	0	2.85861e-05	0	0
COIA1_HUMAN	P39060	COL18A1	COL18A1	3.63957e-05	2.12565e-05	2.48531e-05	0	0.000224138	0	6.47577e-05
COJA1_HUMAN	Q14993	COL19A1	COL19A1	0	0	0	0	1.96374e-05	0	0
CO1A1_HUMAN	P02452	COL1A1	COL1A1	0.000764792	0.000698659	2.99488e-05	0.000456559	1.08312e-05	4.10893e-05	0
CO1A2_HUMAN	P08123	COL1A2	COL1A2	0.000803389	0.000576835	1.71467e-05	0.000396676	0	8.8549e-05	0
COLA1_HUMAN	Q96P44	COL21A1 COL1AL FP633	COL21A1	0	0	0	0	0.000448619	0	0
COQA1_HUMAN	Q96A83	COL26A1 EMID2 EMU2	COL26A1	0	0	0	0	0.000200738	0	0
CO2A1_HUMAN	P02458	COL2A1	COL2A1	4.56228e-05	4.4409e-05	9.34617e-05	0	0	0	0
CO3A1_HUMAN	P02461	COL3A1	COL3A1	0.000429995	6.35145e-05	0.000479181	0.000203554	0.000509065	0.000328714	0.000281952
CO4A1_HUMAN	P02462	COL4A1	COL4A1	0	0	2.74774e-05	1.00512e-05	3.74046e-05	0	0
CO4A2_HUMAN	P08572	COL4A2	COL4A2	0	0	2.63325e-05	4.8162e-05	2.24038e-05	0	0
CO5A1_HUMAN	P20908	COL5A1	COL5A1	7.50549e-05	0.00012338	7.91854e-05	6.15636e-05	8.18225e-06	0	0
CO5A2_HUMAN	P05997	COL5A2	COL5A2	8.10844e-05	0.000113075	5.8769e-05	0.000100443	9.86384e-05	0	0
CO6A1_HUMAN	P12109	COL6A1	COL6A1	0.00104459	0.000821526	9.60777e-05	0.000392177	7.59673e-05	0.000235792	0
CO6A2_HUMAN	P12110	COL6A2	COL6A2	0.000504671	0.000347124	0	0.000222694	3.45306e-05	0	0
CO6A3_HUMAN	P12111	COL6A3	COL6A3	0.000712016	0.00067827	1.21014e-05	0.000216444	9.40959e-05	0	0
CO7A1_HUMAN	Q02388	COL7A1	COL7A1	1.19695e-05	0	0	1.09711e-05	0	0	0
CO8A1_HUMAN	P27658	COL8A1 C3orf7	COL8A1	3.23005e-05	8.63847e-05	0	0.000144677	0	0	0
COL12_HUMAN	Q5KU26	COLEC12 CLP1 NSR2 SCARA4 SRCL	COLEC12	0.000262051	0	0	0	0	0	0
GT251_HUMAN	Q8NBJ5	COLGALT1 GLT25D1 PSEC0241	COLGALT1	0.000159099	0.000122618	0.000224066	0.000223811	0.000156826	0.000113241	4.80286e-05
COMD2_HUMAN	Q86X83	COMMD2 HSPC042 My004	COMMD2	5.10029e-05	0	0	0	0	0	0
COMD3_HUMAN	Q9UBI1	COMMD3 BUP C10orf8	COMMD3	0	0	0	0	0	0	0
COMD4_HUMAN	Q9H0A8	COMMD4	COMMD4	5.33212e-05	0	0	0	0	0	0
COMD7_HUMAN	Q86VX2	COMMD7 C20orf92	COMMD7	0	0	0	0.000140717	0	0	0
COMD9_HUMAN	Q9P000	COMMD9 HSPC166	COMMD9	0	0	0.000201084	0	0.00010265	0.000129805	0
COMT_HUMAN	P21964	COMT	COMT	0.000225133	8.40811e-05	7.37309e-05	0.000178292	0	0	7.68458e-05
COPA_HUMAN	P53621	COPA	COPA	0.000291912	6.39747e-05	7.0237e-05	0.000175896	0.000190919	0.000236329	0.000116939
COPB_HUMAN	P53618	COPB1 COPB MSTP026	COPB1	0.000247087	2.35741e-05	2.06722e-05	6.04951e-05	8.44225e-05	0.000114299	4.30911e-05
COPB2_HUMAN	P35606	COPB2	COPB2	0.00025943	7.41892e-05	0.000281912	7.62366e-05	0.000132841	0.000179854	7.91059e-05
COPE_HUMAN	O14579	COPE	COPE	0.000293267	0	0	0.000380763	0.000110701	0	0
COPG1_HUMAN	Q9Y678	COPG1 COPG	COPG1	0.000269869	2.57391e-05	4.51414e-05	0	0.000138263	0.000103997	5.88105e-05
COPG2_HUMAN	Q9UBF2	COPG2	COPG2	0	0	4.51414e-05	0	6.91317e-05	0	0
CSN2_HUMAN	P61201	COPS2 CSN2 TRIP15	COPS2	9.04062e-05	0	0	0	0.000101334	0.000117597	0
CSN3_HUMAN	Q9UNS2	COPS3 CSN3	COPS3	9.8063e-05	0	9.21636e-05	0	9.40959e-05	0.000118988	4.80286e-05
CSN4_HUMAN	Q9BT78	COPS4 CSN4	COPS4	0.00014689	5.48355e-05	0.000192341	0.000175896	0.000114551	8.86235e-05	5.01168e-05
CSN5_HUMAN	Q92905	COPS5 CSN5 JAB1	COPS5	4.64606e-05	6.63798e-05	5.82086e-05	0.000127756	5.9429e-05	0	0
CSN6_HUMAN	Q7L5N1	COPS6 CSN6 HVIP	COPS6	9.79195e-05	0	0	0	8.36408e-05	0	0
CSN7A_HUMAN	Q9UBW8	COPS7A CSN7A DERP10	COPS7A	0.000117307	0	0	0	7.52767e-05	0	0
CSN7B_HUMAN	Q9H9Q2	COPS7B CSN7B	COPS7B	0	0	0	0	5.01845e-05	0	0
CSN8_HUMAN	Q99627	COPS8 CSN8	COPS8	7.65044e-05	0	9.61707e-05	0.000140717	9.8187e-05	0.000124161	0
COPZ1_HUMAN	P61923	COPZ1 COPZ CGI-120 HSPC181	COPZ1	0.000205729	0	0.000221193	0.000566385	7.52767e-05	0	0
COQ7_HUMAN	Q99807	COQ7	COQ7	0	0	0	0.000134854	0	0	0
COQ9_HUMAN	O75208	COQ9 C16orf49 HSPC326 PSEC0129	COQ9	3.25852e-05	0	0	0.000269707	0	0	0
COR1A_HUMAN	P31146	CORO1A CORO1	CORO1A	0	0	0	0	2.95203e-05	0	0
COR1B_HUMAN	Q9BR76	CORO1B	CORO1B	0.000152556	0.000303626	0.00017587	0.0001082	0.000181222	7.54941e-05	0.000234807
COR1C_HUMAN	Q9ULV4	CORO1C CRN2 CRNN4	CORO1C	0.00165484	0.00397402	0.00165929	0.00454339	0.000795376	0.000507681	0.00254461
COR2A_HUMAN	Q92828	CORO2A IR10 WDR2	CORO2A	0	0	0	0	6.27306e-05	0	0
COR2B_HUMAN	Q9UQ03	CORO2B KIAA0925	CORO2B	6.43074e-05	0	0	0	0	0	0
CORO6_HUMAN	Q6QEF8	CORO6 PP1009 PP1782 PP1881	CORO6	0	0.000428338	0.000235635	0.000159417	0	0	0
CORO7_HUMAN	P57737	CORO7	CORO7	0	0	0	0	1.49063e-05	0	0
COTL1_HUMAN	Q14019	COTL1 CLP	COTL1	0.000807959	0	0	0.0010114	0	0.000356963	0
COX16_HUMAN	Q9P0S2	COX16 C14orf112 HSPC203 PTD019	COX16	9.77556e-05	0	0	0	0	0	0
COX17_HUMAN	Q14061	COX17	COX17	0	0	0.000631979	0.000462355	0	0	0
COX20_HUMAN	Q5RI15	COX20 FAM36A	COX20	0.000180472	0	0	0.000248961	0	0	0
COX41_HUMAN	P13073	COX4I1 COX4	COX4I1	0.000498553	0	0.000377301	0.000809122	0.000112915	0.000407668	0
COX5A_HUMAN	P20674	COX5A	COX5A	0.00032829	0.000148378	0.000765329	0.000947904	0.000221402	0.000623851	0.00027122
COX5B_HUMAN	P10606	COX5B	COX5B	0.000419796	0	0.000771334	0.00184942	0.000322614	0.000611937	0
CX6B1_HUMAN	P14854	COX6B1 COX6B	COX6B1	0.000558092	0	0.00176954	0.00275101	0.00022583	0	0
COX6C_HUMAN	P09669	COX6C	COX6C	0.000586533	0.00028027	0.000491539	0.000719219	0	0.000543783	0
CX7A2_HUMAN	P14406	COX7A2 COX7AL	COX7A2	0.000130341	0	0	0	0	0	0
COX7R_HUMAN	O14548	COX7A2L COX7AR COX7RP	COX7A2L	0.000135354	0	0.000170148	0.000248961	0	0	0
COX7C_HUMAN	P15954	COX7C	COX7C	0.000167581	0	0	0	0	0	0
CBPA4_HUMAN	Q9UI42	CPA4 CPA3 UNQ694/PRO1339	CPA4	0.000100275	0	0	0.000179768	0	0	0.000171677
CBPD_HUMAN	O75976	CPD	CPD	0.000109603	0	0.000187942	0.000232689	0	0.000163959	1.50678e-05
CBPM_HUMAN	P14384	CPM	CPM	5.76769e-05	0	0	0.000204912	5.90405e-05	0.00162383	0
CPNE1_HUMAN	Q99829	CPNE1 CPN1	CPNE1	0.000164581	4.27531e-05	0.000149961	5.48557e-05	7.65526e-05	0.000100224	0
CPNE2_HUMAN	Q96FN4	CPNE2	CPNE2	0	0	0	5.30572e-05	3.70213e-05	4.68149e-05	0
CPNE3_HUMAN	O75131	CPNE3 CPN3 KIAA0636	CPNE3	0.000107925	6.30608e-05	0	0	0.000213284	0	0
HEM6_HUMAN	P36551	CPOX CPO CPX	CPOX	0.000205877	0.000454038	0.000284941	0.000337108	4.5166e-05	0.000281433	6.91612e-05
CPPED_HUMAN	Q9BRF8	CPPED1 CSTP1	CPPED1	6.53343e-05	0.000350338	0	0.000177914	8.36408e-05	0.000237976	9.60572e-05
CBPQ_HUMAN	Q9Y646	CPQ LCH1 PGCP	CPQ	4.52882e-05	0	0	0	0	0	0
CPSF1_HUMAN	Q10570	CPSF1 CPSF160	CPSF1	1.09292e-05	0	6.86934e-05	0	3.74046e-05	0	0
CPSF2_HUMAN	Q9P2I0	CPSF2 CPSF100 KIAA1367	CPSF2	0	0	0	0	5.98792e-05	0	0
CPSF3_HUMAN	Q9UKF6	CPSF3 CPSF73	CPSF3	2.2852e-05	0	8.10952e-05	5.48644e-05	0.000117314	5.29439e-05	0.00010479
CPSF6_HUMAN	Q16630	CPSF6 CFIM68	CPSF6	0.000109554	8.55062e-05	0.000110259	0.000137139	0.000153105	0.000103644	7.81482e-05
CPSF7_HUMAN	Q8N684	CPSF7	CPSF7	6.77904e-05	0	0.000170148	0.00012448	7.23814e-05	0	0
CPT1A_HUMAN	P50416	CPT1A CPT1	CPT1A	0.000110143	0	0	0	0	0	0
CPT2_HUMAN	P23786	CPT2 CPT1	CPT2	0.000118892	0	0	0.000459231	0	0	0
CPVL_HUMAN	Q9H3G5	CPVL VLP PSEC0124 UNQ197/PRO223	CPVL	0	0	0	0	0.000111521	0	4.26921e-05
RABP1_HUMAN	P29762	CRABP1 RBP5	CRABP1	7.33167e-05	0	0	0	0	0	0
RABP2_HUMAN	P29373	CRABP2	CRABP2	0.000367506	0	0.000260181	0	0	0.000535445	0
CRACD_HUMAN	Q6ZU35	CRACD CRAD KIAA1211	CRACD	0	0	8.07273e-05	1.1812e-05	0	0	0
CACP_HUMAN	P43155	CRAT CAT1	CRAT	6.60883e-05	0	0	4.55843e-05	0	0	0
CREB1_HUMAN	P16220	CREB1	CREB1	6.37281e-05	6.81739e-05	0.000291856	0.000218682	0.000142415	0.000231544	6.23074e-05
CREL1_HUMAN	Q96HD1	CRELD1 CIRRIN UNQ188/PRO214	CRELD1	9.12385e-05	5.60541e-05	0	0.000179805	0	0	0
CREL2_HUMAN	Q6UXH1	CRELD2 UNQ185/PRO211	CRELD2	0	0	0.000232834	0.000298098	0	0	0
CRIM1_HUMAN	Q9NZV1	CRIM1 S52 UNQ1886/PRO4330	CRIM1	0	0.000221266	1.94029e-05	0	0	0.000300601	0
CRIP2_HUMAN	P52943	CRIP2 CRP2	CRIP2	8.02501e-05	0.00028664	0	0	0.000273733	0	0
CRIS3_HUMAN	P54108	CRISP3	CRISP3	0	0	0	0	0	0	0.000123502
CRK_HUMAN	P46108	CRK	CRK	0.000120757	0	0	0.000237977	0.000177122	0	6.78051e-05
CRKL_HUMAN	P46109	CRKL	CRKL	0.000181917	0.000111284	0.00039034	0.000142786	0.000309963	0.000275865	0.000339025
DPYL1_HUMAN	Q14194	CRMP1 DPYSL1 ULIP3	CRMP1	0	0	0.000214057	0.000208806	0.00016998	0.000348621	0.00122705
CRNN_HUMAN	Q9UBG3	CRNN C1orf10 DRC1 PDRC1 SEP53	CRNN	0.000109164	0	0	0	0	0	0
CROCC_HUMAN	Q5TZA2	CROCC KIAA0445	CROCC	0	0	1.93181e-05	2.82663e-05	0	2.13714e-05	2.51678e-05
OCTC_HUMAN	Q9UKG9	CROT COT	CROT	0	0	0	0	0	0	0
CRTAP_HUMAN	O75718	CRTAP CASP	CRTAP	0.000156307	0	0.000113491	0.000206584	0	0	0
CRBG1_HUMAN	Q9Y4K1	CRYBG1 AIM1	CRYBG1	1.24134e-05	0	0	0	0	0	0
QOR_HUMAN	Q08257	CRYZ	CRYZ	0.000167581	0	0.000301077	0.000277413	0.000193569	0.000232953	0.000131736
QORL1_HUMAN	O95825	CRYZL1 4P11	CRYZL1	0	0	0	0.00012448	7.72069e-05	7.32232e-05	0
CISY_HUMAN	O75390	CS	CS	0.000361738	0.000121271	0.000386537	0.000372132	0.000217144	0.000243052	0.000110835
CSDE1_HUMAN	O75534	CSDE1 D1S155E KIAA0885 NRU UNR	CSDE1	0.000128742	5.66839e-05	9.94125e-05	0.000163643	0.000101497	0.000114514	2.59031e-05
XPO2_HUMAN	P55060	CSE1L CAS XPO2	CSE1L	0.00027557	8.02592e-05	0.000186878	0.000106852	0.00034901	0.000266856	0.000282932
CSF1_HUMAN	P09603	CSF1	CSF1	0	0	0	0.000176023	0	0	0
CSK_HUMAN	P41240	CSK	CSK	2.30013e-05	0	0	0	0	0	0
KC1A_HUMAN	P48729	CSNK1A1	CSNK1A1	6.01573e-05	0	0	0	0.00011581	0	5.91121e-05
KC1D_HUMAN	P48730	CSNK1D HCKID	CSNK1D	0	5.36688e-05	0	0	9.60979e-05	0	0
KC1E_HUMAN	P49674	CSNK1E	CSNK1E	0	0	0	0	0.000128131	0	7.35757e-05
KC1G3_HUMAN	Q9Y6M4	CSNK1G3	CSNK1G3	0	0	0	0	7.38007e-05	0	0
CSK21_HUMAN	P68400	CSNK2A1 CK2A1	CSNK2A1	0.000104469	0.000196189	0.000138763	0	0.000368019	0.000135889	7.68458e-05
CSK22_HUMAN	P19784	CSNK2A2 CK2A2	CSNK2A2	7.16724e-05	0.000153807	0	0	0.000165242	0.000149147	0
CSK2B_HUMAN	P67870	CSNK2B CK2N G5A	CSNK2B	9.40815e-05	0.000201795	0	0	0.000270996	0.000244601	0.000138322
CSPG4_HUMAN	Q6UVK1	CSPG4 MCSP	CSPG4	0.000481111	0.000688393	0.000351174	0.000158909	0.000101968	0.000351771	4.13314e-05
CSRP1_HUMAN	P21291	CSRP1 CSRP CYRP	CSRP1	0.000293688	0.000120116	0	0.000616474	0.000322614	0.000135986	0.00010978
CSRP2_HUMAN	Q16527	CSRP2 LMO5 SMLIM	CSRP2	0.000195511	0.000660637	0.000356228	7.70592e-05	0.000322614	0.000757533	0.00016467
CYTT_HUMAN	P09228	CST2	CST2	0	0	0.000276491	0	0	0	0
CYTC_HUMAN	P01034	CST3	CST3	0	0	0.000138245	0.000606841	0	0	0.000144086
CYTS_HUMAN	P01036	CST4	CST4	0.000165516	0	0	0	0	0	0.000360215
CYTM_HUMAN	Q15828	CST6	CST6	0.000346756	0	0	0.000994014	0	0	0.000203415
CYTA_HUMAN	P01040	CSTA STF1 STFA	CSTA	0.0025179	0	0.00167363	0.00194501	0.000136867	0.00311532	0.0010479
CYTB_HUMAN	P04080	CSTB CST6 STFB	CSTB	0.000321001	0	0.000201084	0.000294226	0	0.00025961	0
CSTF1_HUMAN	Q05048	CSTF1	CSTF1	9.77556e-05	7.8826e-05	0.000317136	0	0.000266605	0.000254793	0.0003362
CSTF2_HUMAN	P33240	CSTF2	CSTF2	3.84612e-05	6.2027e-05	0.000290089	0.00017132	4.93618e-05	0.000421334	0
CSTFT_HUMAN	Q9H0L4	CSTF2T KIAA0689	CSTF2T	0	0	0.000101645	0.000176995	4.70479e-05	0.000178482	0
CSTF3_HUMAN	Q12996	CSTF3	CSTF3	5.65333e-05	0	0	0	3.62779e-05	0	0
CTGE2_HUMAN	Q96RT6	CTAGE1 CTAGE2	CTAGE1	2.07012e-05	0	0	0	0	0	0
CTBP1_HUMAN	Q13363	CTBP1 CTBP	CTBP1	0.000146633	5.25507e-05	0.000131449	0.000134854	0.000125461	0.000127396	0.000120072
CTBP2_HUMAN	P56545	CTBP2	CTBP2	0.000107731	0	0.000108859	9.90761e-05	4.60878e-05	0	4.70484e-05
DIAC_HUMAN	Q01459	CTBS CTB	CTBS	2.66606e-05	0	0	7.35565e-05	0	0	0
CTHR1_HUMAN	Q96CG8	CTHRC1 UNQ762/PRO1550	CTHRC1	9.02359e-05	0	0.000325241	0.000248961	0	0.000659009	0
CTNA1_HUMAN	P35221	CTNNA1	CTNNA1	0.00146329	0.00237109	0.00275167	0.00223501	0.00130981	0.00199813	0.000922149
CTNA2_HUMAN	P26232	CTNNA2 CAPR	CTNNA2	0.000353438	0.000408394	0.000789914	0.000885146	0.000207907	0.000539859	0.000186625
CTNB1_HUMAN	P35222	CTNNB1 CTNNB OK/SW-cl.35 PRO2286	CTNNB1	0.000966147	0.00178054	0.00145175	0.00154473	0.000814759	0.00123043	0.000718734
CTBL1_HUMAN	Q8WYA6	CTNNBL1 C20orf33 PP8304	CTNNBL1	5.41415e-05	0	0.000102089	2.48961e-05	3.47431e-05	0	0
CTND1_HUMAN	O60716	CTNND1 KIAA0384	CTNND1	0.00016863	0.000432083	0.000169254	0.000290058	0.000355473	0.000169862	0.000160095
PYRG1_HUMAN	P17812	CTPS1 CTPS	CTPS1	8.78066e-05	9.41206e-05	9.90415e-05	0	7.86473e-05	0.000182538	8.60214e-05
PYRG2_HUMAN	Q9NRF8	CTPS2	CTPS2	2.66606e-05	0	0	0	0	0	0
CTR9_HUMAN	Q6PD62	CTR9 KIAA0155 SH2BP1	CTR9	2.18856e-05	0	0	0	1.12353e-05	0	0
PPGB_HUMAN	P10619	CTSA PPGB	CTSA	0.000119643	0	7.95069e-05	8.99024e-05	2.78803e-05	5.28834e-05	0
CATB_HUMAN	P07858	CTSB CPSB	CTSB	0.00030909	0	0	0.000353684	3.96193e-05	0	9.10016e-05
CATC_HUMAN	P53634	CTSC CPPI	CTSC	0.000107325	0	0	0.000311201	0	0	0
CATD_HUMAN	P07339	CTSD CPSD	CTSD	0.000784471	0.000364351	0.000783494	0.000785091	0.000518573	0.000675188	0.000845304
CATG_HUMAN	P08311	CTSG	CTSG	0.000365887	0	0	0	0	0	0
CATL1_HUMAN	P07711	CTSL CTSL1	CTSL	9.26105e-05	0	0	0.000170341	0	0	0
CATZ_HUMAN	Q9UBR2	CTSZ	CTSZ	9.5054e-05	0	0	0	0	0	0
SRC8_HUMAN	Q14247	CTTN EMS1	CTTN	0.000745102	0.000711977	0.000415488	0.00101931	0.000242828	0.000144689	0.000260284
CT2NL_HUMAN	Q9P2B4	CTTNBP2NL KIAA1433	CTTNBP2NL	7.54114e-05	3.60348e-05	0	0	0	0	0
CUED1_HUMAN	Q9NWM3	CUEDC1	CUEDC1	8.42121e-05	0	0	0	0	0	0
CUL1_HUMAN	Q13616	CUL1	CUL1	2.61993e-05	0	7.37309e-05	1.79805e-05	0.000158917	4.52965e-05	3.84229e-05
CUL2_HUMAN	Q13617	CUL2	CUL2	3.38445e-05	0	0	0	2.59575e-05	0	0
CUL3_HUMAN	Q13618	CUL3 KIAA0617	CUL3	1.97708e-05	5.66839e-05	0	0	0.000397529	0.000160319	0.000129515
CUL4A_HUMAN	Q13619	CUL4A	CUL4A	3.99909e-05	0	0	0	5.98792e-05	0	0
CUL4B_HUMAN	Q13620	CUL4B KIAA0695	CUL4B	0.000180472	0	2.12685e-05	0.000248961	0	0	0
CUL5_HUMAN	Q93034	CUL5 VACM1	CUL5	2.57817e-05	4.15786e-05	0	0	7.44495e-05	0	0
CUL7_HUMAN	Q14999	CUL7 KIAA0076	CUL7	0	0	0	0	2.36471e-05	0	0
CSTOS_HUMAN	Q96C57	CUSTOS C12orf43	CUSTOS	0	0	0.000236992	0	8.06536e-05	0.00010199	0
CUTA_HUMAN	O60888	CUTA ACHAP C6orf82	CUTA	0.000154351	0	0.000116417	0.000255512	0.000118858	0	0
CASP_HUMAN	Q13948	CUX1 CUTL1	CUX1	0.000106642	0	0.000114905	6.30485e-05	0	0	0
CUX1_HUMAN	P39880	CUX1 CUTL1	CUX1	5.00699e-05	0	8.09242e-05	1.97347e-05	0	0	0
CWC15_HUMAN	Q9P013	CWC15 C11orf5 AD-002 HSPC148	CWC15	8.71125e-05	0.000373694	0.000409616	0.000234698	8.36408e-05	0.000317301	0
C19L1_HUMAN	Q69YN2	CWF19L1	CWF19L1	0	0	0	0	2.46809e-05	0	0
CXAR_HUMAN	P78310	CXADR CAR	CXADR	0	0	0.000552982	0.000619192	0	0.000142785	5.76343e-05
CX056_HUMAN	Q9H5V9	CXorf56	CXorf56	0	0	0.000425371	0	5.79051e-05	0	0
CYB5_HUMAN	P00167	CYB5A CYB5	CYB5A	0.00035192	0	0.000294924	0.000431532	0	0	0
CYB5B_HUMAN	O43169	CYB5B CYB5M OMB5	CYB5B	0.00022461	0	0.000329806	0.000809122	0.000442804	0.000892408	0.00013561
NB5R1_HUMAN	Q9UHQ9	CYB5R1 NQO3A2 UNQ3049/PRO9865	CYB5R1	0.00017251	0	0.000130113	0	0	0	0
NB5R3_HUMAN	P00387	CYB5R3 DIA1	CYB5R3	0.000621469	0.000111284	0.000218104	0.000895045	0	0.000299756	0
CYBR1_HUMAN	Q53TN4	CYBRD1 DCYTB FRRS3	CYBRD1	0	0	6.91227e-05	5.05701e-05	0	0.000178482	0
CY1_HUMAN	P08574	CYC1	CYC1	0.000184339	7.20695e-05	0.000122668	4.62355e-05	8.60305e-05	0	6.58678e-05
CYC_HUMAN	P99999	CYCS CYC	CYCS	0.000636149	0.000735709	0.00269423	0.00134286	0.000439114	0.00183527	0.000672401
CYFP1_HUMAN	Q7L576	CYFIP1 KIAA0068	CYFIP1	5.47101e-05	5.21883e-05	0	3.34809e-05	0.000114213	0	0
CYFP2_HUMAN	Q96F07	CYFIP2 KIAA1168 PIR121	CYFIP2	3.56676e-05	0	0	0	7.62939e-05	0	0
CYGB_HUMAN	Q8WWM9	CYGB STAP	CYGB	5.58603e-05	0	0	0	0	0	0
CP1B1_HUMAN	Q16678	CYP1B1	CYP1B1	5.79821e-05	0	0	0	0	0	0
CP20A_HUMAN	Q6UW02	CYP20A1 UNQ667/PRO1301	CYP20A1	0	0	0	0.0001556	0	0	0
CP2S1_HUMAN	Q96SQ9	CYP2S1 UNQ891/PRO1906	CYP2S1	6.28429e-05	0	0	0	0	0	0
CP51A_HUMAN	Q16850	CYP51A1 CYP51	CYP51A1	6.17404e-05	0	7.76115e-05	8.51707e-05	0	0	0
CYRIB_HUMAN	Q9NUQ9	CYRIB CYRI FAM49B BM-009	CYRIB	9.54326e-05	0	0	0	0.000203451	7.71812e-05	6.23074e-05
CYTM1_HUMAN	Q9H1C7	CYSTM1 C5orf32 ORF1-FL49	CYSTM1	0	0	0.000201084	0.000294226	0	0	0
D2HDH_HUMAN	Q8N465	D2HGDH D2HGD	D2HGDH	0	0	0	0.000144486	0	0	0
DAAM1_HUMAN	Q9Y4D1	DAAM1 KIAA0666	DAAM1	0	0	0	0	1.22401e-05	0	0
DAB2_HUMAN	P98082	DAB2 DOC2	DAB2	0.000183009	0.00021533	5.39494e-05	0.000355746	0	0	0
DAD1_HUMAN	P61803	DAD1	DAD1	0.000563078	0.000525507	0.00117638	0.00141029	0.000250922	0.000645813	0.000288172
DAG1_HUMAN	Q14118	DAG1	DAG1	0.000270297	0.00106618	0.00135808	0.000581276	0.000349222	0.00222045	0.000297084
RT29_HUMAN	P51398	DAP3 MRPS29	DAP3	3.82522e-05	0	0	0	6.5458e-05	0	0
DAPK1_HUMAN	P53355	DAPK1 DAPK	DAPK1	0	0	0	0	0	0	2.16129e-05
SYDC_HUMAN	P14868	DARS1 DARS PIG40	DARS1	0.000303971	6.63798e-05	0.000194029	0.000141951	0.000316954	0.000250323	0.000444897
SYDM_HUMAN	Q6PI48	DARS2	DARS2	3.17045e-05	0	0	0	2.03451e-05	0	0
DAXX_HUMAN	Q9UER7	DAXX BING2 DAP6	DAXX	0	0	5.46155e-05	0	0	0	0
DAZP1_HUMAN	Q96EP5	DAZAP1	DAZAP1	0.000171053	0.000117322	0.000124049	0.000130135	8.7531e-05	0.000332059	5.36133e-05
ACBP_HUMAN	P07108	DBI	DBI	0.000117307	0	0	0	0.00022583	0	0
DREB_HUMAN	Q16643	DBN1 D0S117E	DBN1	0.000758504	0.00163425	0.00115996	0.00150779	0.00106024	0.00100482	0.00214302
DBNL_HUMAN	Q9UJU6	DBNL CMAP SH3P7 PP5423	DBNL	0.000152989	0.000131377	0	0	0.000250922	0	9.60572e-05
ODB2_HUMAN	P11182	DBT BCATE2	DBT	6.64e-05	0	0	0	0	0	0
DCAF7_HUMAN	P61962	DCAF7 HAN11 WDR68	DCAF7	0	0	0	0	9.65086e-05	0	0
DCBD1_HUMAN	Q8N8Z6	DCBLD1	DCBLD1	0	4.85083e-05	0	6.13675e-05	0	7.32232e-05	0
DCBD2_HUMAN	Q96PD2	DCBLD2 CLCP1 ESDN	DCBLD2	0.000453781	0.00096446	0.000238005	0.000428565	2.65682e-05	0.0019822	0
DCD_HUMAN	P81605	DCD AIDD DSEP	DCD	0.00222168	0.00206381	0.00445294	0.00458226	0.000889634	0.00507981	0.00251495
PCD16_HUMAN	Q96JQ0	DCHS1 CDH19 CDH25 FIB1 KIAA1773 PCDH16	DCHS1	0	0	0	0	4.35125e-06	0	0
DCK_HUMAN	P27707	DCK	DCK	0	0	0	0	4.85656e-05	0.000131506	0
DCLK1_HUMAN	O15075	DCLK1 DCAMKL1 DCDC3A KIAA0369	DCLK1	0	0	0	0	4.59004e-05	0	0
DCP1A_HUMAN	Q9NPI6	DCP1A SMIF	DCP1A	2.79302e-05	0	0	0	0	0	0
DCPS_HUMAN	Q96C86	DCPS DCS1 HINT5 HSPC015	DCPS	7.51966e-05	0	0	0.000207467	5.79051e-05	0	5.91121e-05
DCTD_HUMAN	P32321	DCTD	DCTD	0.000146633	0	0	0.000323649	0	0	0
DCTN1_HUMAN	Q14203	DCTN1	DCTN1	0.000115738	0	3.11539e-05	7.97726e-05	7.42165e-05	0	0
DCTN2_HUMAN	Q13561	DCTN2 DCTN50	DCTN2	0.000166897	0.000315304	0.000245424	0.000404561	0.0004106	0.000366136	0.00010479
DCTN3_HUMAN	O75935	DCTN3 DCTN22	DCTN3	0.000223441	0.000120116	0	0.000231178	0.00017923	0	0
DCTN4_HUMAN	Q9UJW0	DCTN4	DCTN4	5.08712e-05	0	0	0	4.34289e-05	0	0
DCTN6_HUMAN	O00399	DCTN6 WS3	DCTN6	5.58603e-05	0	0.00010533	0.000231178	0	0	0
DCTP1_HUMAN	Q9H773	DCTPP1 XTP3TPA CDA03	DCTPP1	0.000124102	0	0.000465669	0.000255512	0.000158477	0.000386372	0.000121335
DCNL1_HUMAN	Q96GG9	DCUN1D1 DCN1 DCUN1L1 RP42 SCCRO	DCUN1D1	0	0	0	0.000215766	0	0	0
DCNL3_HUMAN	Q8IWE4	DCUN1D3 SCCRO3	DCUN1D3	0.000242729	0.000111284	0	0.00018838	6.64206e-05	0.000251974	0
DCX_HUMAN	O43602	DCX DBCN LISX	DCX	0	0	0.000539494	0	0	0.000233688	0.000168686
DCXR_HUMAN	Q7Z4W1	DCXR SDR20C1	DCXR	4.5118e-05	0	0	0.00018672	0.00011581	0.000156795	0
DDAH1_HUMAN	O94760	DDAH1 DDAH	DDAH1	0.000132443	0	0.00028541	0.000104403	7.28484e-05	0.000190749	0
DDAH2_HUMAN	O95865	DDAH2 DDAH G6A NG30	DDAH2	0.000235597	8.40811e-05	0.000294924	5.39415e-05	0.000602214	0.000244702	7.68458e-05
DDB1_HUMAN	Q16531	DDB1 XAP1	DDB1	0.00033105	0.000417095	0.000573701	0.000597071	0.000539384	0.000889621	0.000263212
DDB2_HUMAN	Q92466	DDB2	DDB2	0	0	0	0	6.27306e-05	0	0
OST48_HUMAN	P39656	DDOST KIAA0115 OST48 OK/SW-cl.45	DDOST	0.000524379	0.000247297	0.000438767	0.000252507	0.000103321	0.000279772	9.04068e-05
DDR1_HUMAN	Q08345	DDR1 CAK EDDR1 NEP NTRK4 PTK3A RTK6 TRKE	DDR1	0	2.49746e-05	0	0	0	0	0
DDR2_HUMAN	Q16832	DDR2 NTRKR3 TKT TYRO10	DDR2	8.4989e-05	0.000156027	4.56067e-05	8.20111e-05	0	0.000206082	0
DDRGK_HUMAN	Q96HY6	DDRGK1 C20orf116 UFBP1	DDRGK1	0.000253191	0.000385372	0.00110596	0.000454483	8.36408e-05	0.000951902	0
DOPD_HUMAN	P30046	DDT	DDT	0.000181153	0	0	0.000622401	0	0.000470386	0
DDTL_HUMAN	A6NHG4	DDTL	DDTL	0	0	0	0	0.000215076	0	0.00016467
DDX1_HUMAN	Q92499	DDX1	DDX1	0.000233079	0.00023071	0.000127713	0.000156217	0.000192782	0.000174005	0.000140572
DDX10_HUMAN	Q13206	DDX10	DDX10	0	0	0	0	3.72657e-05	0	0
DDX17_HUMAN	Q92841	DDX17	DDX17	0.000316147	0.000457191	0.000453724	0.000269675	0.000517527	0.000535064	0.000749246
DDX18_HUMAN	Q9NVP1	DDX18 cPERP-D	DDX18	0	0	0	0	4.01476e-05	0	0
DD19A_HUMAN	Q9NUU7	DDX19A DDX19L	DDX19A	6.51704e-05	0	0	0	4.18204e-05	0	0
DDX21_HUMAN	Q9NR30	DDX21	DDX21	3.72154e-05	0	0	0	0.000155745	0	0
DDX23_HUMAN	Q9BUQ8	DDX23	DDX23	4.27681e-05	0	0	0	6.27306e-05	0	2.40143e-05
DDX24_HUMAN	Q9GZR7	DDX24	DDX24	0	0	0	0	0.00018035	0	4.80286e-05
DDX27_HUMAN	Q96GQ7	DDX27 cPERP-F RHLP HSPC259 PP3241	DDX27	0	0	0	0	9.20048e-05	0	0.000102461
DX39A_HUMAN	O00148	DDX39A DDX39	DDX39A	0.000457152	0.000308869	0.000677057	0.000231178	0.000430153	0.000511748	0
DX39B_HUMAN	Q13838	DDX39B BAT1 UAP56	DDX39B	0.000480007	0.000334608	0.000917345	0.000526501	0.000629866	0.000594945	0.00044696
DDX3X_HUMAN	O00571	DDX3X DBX DDX3	DDX3X	0.000382942	0.000431923	0.000175546	0.000178861	0.000546529	0.000307147	0.00072635
DDX3Y_HUMAN	O15523	DDX3Y DBY	DDX3Y	0	0	0	0	0.000422787	0	0.000489497
DDX41_HUMAN	Q9UJV9	DDX41 ABS	DDX41	0	0	0	0	7.52767e-05	0	0
DDX42_HUMAN	Q86XP3	DDX42	DDX42	6.8334e-05	0	4.295e-05	1.57111e-05	3.65421e-05	0	2.23823e-05
DDX46_HUMAN	Q7L014	DDX46 KIAA0801	DDX46	0.000100262	0	7.56214e-05	9.6818e-05	7.72069e-05	0	3.94081e-05
DDX47_HUMAN	Q9H0S4	DDX47	DDX47	2.30013e-05	0	0	0	7.38007e-05	0	0
DDX5_HUMAN	P17844	DDX5 G17P1 HELR HLR1	DDX5	0.000332374	0.000694583	0.000724026	0.00032896	0.000687309	0.00076807	0.000952219
DDX50_HUMAN	Q9BQ39	DDX50	DDX50	3.53333e-05	0	0	0	5.44169e-05	0	0
DDX56_HUMAN	Q9NY93	DDX56 DDX21 NOH61	DDX56	0	0	0	0	2.42828e-05	0	0
DDX6_HUMAN	P26196	DDX6 HLR2 RCK	DDX6	0.000141476	0.000233559	0.000118052	6.90838e-05	0.000543665	0.000188735	0.000298845
DECR_HUMAN	Q16698	DECR1 DECR SDR18C1	DECR1	0.000252863	0.000210203	0.000462543	0.000290292	0.000104551	0.000396626	0
DECR2_HUMAN	Q9NUI1	DECR2 PDCR SDR17C1	DECR2	0.000123459	0.000203422	0.000134287	0.000272552	0.000145697	0	0
DEF1_HUMAN	P59665	DEFA1 DEF1 DEFA2 MRS; DEFA1B	DEFA1; DEFA1B	0.000589485	0	0	0	0	0	0.000691612
DEK_HUMAN	P35659	DEK	DEK	0.000116149	0.000117322	0.000308641	0	0	0	0
DEN1A_HUMAN	Q8TEH3	DENND1A FAM31A KIAA1608	DENND1A	1.05682e-05	0	0	0	0	0	0
DEN5B_HUMAN	Q6ZUT9	DENND5B	DENND5B	8.09012e-06	0	0	0	0	0	0
DENR_HUMAN	O43583	DENR DRP1 H14	DENR	0.000240885	0.000229312	0.000301626	0.000735565	0.0002053	0.000222457	0
DEOC_HUMAN	Q9Y315	DERA CGI-26	DERA	0.000100802	0	0	0	8.60305e-05	0	0
DERL1_HUMAN	Q9BUN8	DERL1 DER1 UNQ243/PRO276	DERL1	0.000101126	0	0	0	0	0	0
DESM_HUMAN	P17661	DES	DES	0.00185579	0.00516164	0.00398495	0.00169997	0.00368019	0.00101926	0.00443998
DFFA_HUMAN	O00273	DFFA DFF1 DFF45 H13	DFFA	7.92613e-05	0.000170435	0.000179345	0.000174945	6.10352e-05	0	0
DGCR8_HUMAN	Q8WYQ5	DGCR8 C22orf12 DGCRK6 LP4941	DGCR8	0	0	0	0	2.62593e-05	0	0
DGUOK_HUMAN	Q16854	DGUOK DGK	DGUOK	7.36856e-05	7.8826e-05	0.000345614	0.00020228	0	0.000267722	0
DHCR7_HUMAN	Q9UBM7	DHCR7 D7SR	DHCR7	3.25852e-05	0	0.00011926	0	2.78803e-05	0	0
PYRD_HUMAN	Q02127	DHODH	DHODH	0	0	5.14402e-05	0.000301069	0	0	0
DHYS_HUMAN	P49366	DHPS DS	DHPS	0	0	0	0	5.50805e-05	9.94312e-05	0
DHRS1_HUMAN	Q96LJ7	DHRS1 SDR19C1	DHRS1	0.000103506	0	0	0	0	0	0
DHRS2_HUMAN	Q13268	DHRS2 SDR25C1	DHRS2	0	0	0	0	0	0	0.000192114
DHRS3_HUMAN	O75911	DHRS3 RDH17 SDR16C1 UNQ2424/PRO4983	DHRS3	5.17529e-05	0	0	0	0	0	0
DHRS4_HUMAN	Q9BTZ2	DHRS4 SDR25C2 UNQ851/PRO1800	DHRS4	9.77556e-05	0	7.37309e-05	0.000485473	0	0	0
DHRS7_HUMAN	Q9Y394	DHRS7 DHRS7A RETSDR4 SDR34C1 CGI-86 UNQ285/PRO3448	DHRS7	0.000231526	0	0	0	0	0	0
DHX15_HUMAN	O43143	DHX15 DBP1 DDX15	DHX15	0.000125913	0.000110876	8.14894e-05	4.64237e-05	0.000215076	0.000313591	0.000177336
DHX29_HUMAN	Q7Z478	DHX29 DDX29	DHX29	3.78409e-05	2.44106e-05	0	0	5.82787e-05	0	0
DHX30_HUMAN	Q7L2E3	DHX30 DDX30 KIAA0890	DHX30	5.25254e-05	2.82362e-05	6.60277e-05	2.41529e-05	8.98826e-05	0	1.72043e-05
DHX35_HUMAN	Q9H5Z1	DHX35 C20orf15 DDX35	DHX35	0	0	0	0	0	0	7.29549e-05
DHX36_HUMAN	Q9H2U1	DHX36 DDX36 KIAA1488 MLEL1 RHAU	DHX36	2.04012e-05	3.29013e-05	0	0	4.58206e-05	0	8.01869e-05
DHX37_HUMAN	Q8IY37	DHX37 DDX37 KIAA1517	DHX37	9.02359e-06	0	0	0	0	0	0
DHX57_HUMAN	Q6P158	DHX57	DHX57	0	0	0	0	9.65086e-06	0	0
DHX9_HUMAN	Q08211	DHX9 DDX9 LKP NDH2	DHX9	0.000166706	0.000232565	0.000398597	0.000181699	0.000517861	0.000578253	0.000245252
DBLOH_HUMAN	Q9NR28	DIABLO SMAC	DIABLO	0.000195948	0	0.000491539	0	0.000139401	0.000150988	0.000128076
DIAP1_HUMAN	O60610	DIAPH1 DIAP1	DIAPH1	2.70806e-05	0	0	0	1.60163e-05	2.89126e-05	0
DICER_HUMAN	Q9UPY3	DICER1 DICER HERNA KIAA0928	DICER1	0	0	0	0	6.87458e-06	0	0
DIDO1_HUMAN	Q9BTC0	DIDO1 C20orf158 DATF1 KIAA0333	DIDO1	0	0	0	1.32643e-05	1.23404e-05	0	0
DIP2B_HUMAN	Q9P265	DIP2B KIAA1463	DIP2B	6.86004e-06	1.47511e-05	0.000103482	0	0	0	0
DIP2C_HUMAN	Q9Y2E4	DIP2C KIAA0934	DIP2C	0	0	0	0	1.32064e-05	0	0
DIK2A_HUMAN	Q8NDZ4	DIPK2A C3orf58 DIA1	DIPK2A	2.39401e-05	0	0	0	3.07252e-05	0	0
RRP44_HUMAN	Q9Y2L1	DIS3 KIAA1008 RRP44	DIS3	2.15242e-05	0	0	0	0	0	0
DI3L1_HUMAN	Q8TF46	DIS3L DIS3L1 KIAA1955	DIS3L	9.69477e-06	0	0	0	0	0	0
DISP2_HUMAN	A7MBM2	DISP2 C15orf36 DISPB KIAA1742 LINC00594	DISP2	0	0	0	0	0	9.39377e-05	0
DKC1_HUMAN	O60832	DKC1 NOLA4	DKC1	0	8.69804e-05	0	0	6.48937e-05	0	0
DKK1_HUMAN	O94907	DKK1 UNQ492/PRO1008	DKK1	0	0	0	0	0	0.000295418	0
ODP2_HUMAN	P10515	DLAT DLTA	DLAT	0.000119135	0	6.22228e-05	0.000140717	9.8187e-05	8.86235e-05	0
DLDH_HUMAN	P09622	DLD GCSL LAD PHE3	DLD	0.000386466	0.000210203	0.000434872	0.000731682	0.000418204	0.000562656	0.000448267
DLG1_HUMAN	Q12959	DLG1	DLG1	4.11754e-05	0.000100897	0.000186709	0.000108765	0.000338745	0.000101917	5.76343e-05
DLG2_HUMAN	Q15700	DLG2	DLG2	0	0	0	0	5.37691e-05	0	0
DLGP4_HUMAN	Q9Y2H0	DLGAP4 DAP4 KIAA0964 SAPAP4	DLGAP4	0	2.33559e-05	4.09616e-05	0	1.39401e-05	5.28834e-05	0
ODO2_HUMAN	P36957	DLST DLTS	DLST	0.000594566	0.000360348	0.000663806	0.000954442	0.000368702	0.000299532	0.000376387
ATP5S_HUMAN	Q99766	DMAC2L ATP5S ATPW	DMAC2L	0	0	8.84771e-05	0.000258919	0	0	0
DMBT1_HUMAN	Q9UGM3	DMBT1 GP340	DMBT1	1.35514e-05	0	0	0	0	0	1.76657e-05
DMD_HUMAN	P11532	DMD	DMD	5.49446e-06	4.13514e-05	0	0	8.8146e-06	0	0
DYH1_HUMAN	Q9P2D7	DNAH1 DHC7 DNAHC1 KIAA1410	DNAH1	2.40876e-06	0	0	0	0	0	4.73383e-06
DYH10_HUMAN	Q8IVF4	DNAH10 KIAA2017	DNAH10	0	0	4.295e-06	6.28444e-06	0	0	0
DYH14_HUMAN	Q0VDD8	DNAH14 C1orf67	DNAH14	0	0	0	0	0	1.01917e-05	0
DYH17_HUMAN	Q9UFH2	DNAH17 DNAHL1 DNEL2	DNAH17	0	4.95566e-06	8.17856e-06	0	2.95783e-06	8.0092e-06	0
DYH2_HUMAN	Q9P225	DNAH2 DNAHC2 DNHD3 KIAA1503	DNAH2	2.30919e-06	0	0	0	0	0	0
DYH3_HUMAN	Q8TD57	DNAH3 DNAHC3B	DNAH3	2.49059e-06	0	0	0	0	0	0
DYH5_HUMAN	Q8TE73	DNAH5 DNAHC5 HL1 KIAA1603	DNAH5	0	7.15246e-06	8.36267e-06	7.05203e-06	2.846e-06	0	4.35798e-06
DYH6_HUMAN	Q9C0G6	DNAH6 DNAHC6 DNHL1 HL2 KIAA1697	DNAH6	2.46443e-06	5.29923e-06	0	0	0	0	0
DYH9_HUMAN	Q9NYC9	DNAH9 DNAH17L DNEL1 KIAA0357	DNAH9	2.29115e-06	0	4.32017e-06	0	2.9405e-06	0	0
DNJA1_HUMAN	P31689	DNAJA1 DNAJ2 HDJ2 HSJ2 HSPF4	DNAJA1	0.00013712	0.000448432	0.000452464	3.5961e-05	0.000602214	0.000588854	0.000384229
DNJA2_HUMAN	O60884	DNAJA2 CPR3 HIRIP4	DNAJA2	0.000179152	0.000164506	0.000233335	6.35087e-05	0.000212738	0.000310182	0.000175409
DNJA3_HUMAN	Q96EY1	DNAJA3 HCA57 TID1	DNAJA3	6.78472e-05	4.85083e-05	0	0	4.34289e-05	0	8.86682e-05
DNJB1_HUMAN	P25685	DNAJB1 DNAJ1 HDJ1 HSPF1	DNAJB1	0.000123869	0.00013276	0.000291043	0	0.000237716	0.000536405	0.000182003
DJB11_HUMAN	Q9UBS4	DNAJB11 EDJ ERJ3 HDJ9 PSEC0121 UNQ537/PRO1080	DNAJB11	0.000243629	0.000184568	0.000579123	0.000206076	0.000257042	0.000333243	0.000253029
DJB12_HUMAN	Q9NXW2	DNAJB12	DNAJB12	2.79302e-05	0	0	0	0	0	0
DNJB4_HUMAN	Q9UDY4	DNAJB4 DNAJW HLJ1	DNAJB4	0.000178125	0.000265519	0.00010955	0.000111173	5.9429e-05	0.000160922	0.000151669
DNJB6_HUMAN	O75190	DNAJB6 HSJ2 MRJ MSJ1	DNAJB6	3.25852e-05	0	0	0	4.18204e-05	0	0.000192114
DNJB7_HUMAN	Q7Z6W7	DNAJB7 HSC3	DNAJB7	6.73697e-05	7.20695e-05	0	0.000301754	4.30153e-05	0	6.58678e-05
DNJC1_HUMAN	Q96KC8	DNAJC1 HTJ1	DNAJC1	5.9662e-05	0	0	0.000227566	0	0	0
DJC10_HUMAN	Q8IXB1	DNAJC10 ERDJ5 UNQ495/PRO1012	DNAJC10	9.03981e-05	0	2.43069e-05	8.89145e-05	4.13608e-05	0	0
DJC11_HUMAN	Q9NVH1	DNAJC11	DNAJC11	9.31005e-05	0	0.00014044	0	0	0	0
DJC13_HUMAN	O75165	DNAJC13 KIAA0678 RME8	DNAJC13	6.36537e-05	0	0	1.27421e-05	0	0	0
TIM14_HUMAN	Q96DA6	DNAJC19 TIM14 TIMM14	DNAJC19	0.000195511	0	0.000368655	0.000404561	0	0	0
DNJC2_HUMAN	Q99543	DNAJC2 MPHOSPH11 MPP11 ZRF1	DNAJC2	0	0	0	0	3.13653e-05	0	0
DNJC3_HUMAN	Q13217	DNAJC3 P58IPK PRKRI	DNAJC3	0.000126561	0	0	0	2.59575e-05	0	0
DNJC5_HUMAN	Q9H3Z4	DNAJC5 CLN4	DNAJC5	5.33212e-05	0	0.000603253	0.000514896	0	0.000519219	0
DNJC7_HUMAN	Q99615	DNAJC7 TPR2 TTC2	DNAJC7	3.14214e-05	4.50434e-05	0	0	5.37691e-05	7.27979e-05	6.17511e-05
DNJC8_HUMAN	O75937	DNAJC8 SPF31 HSPC315 HSPC331	DNAJC8	0.000127377	8.40811e-05	0.000396821	0.000539415	0.000200738	0.000339723	0.000153692
DNJC9_HUMAN	Q8WXX5	DNAJC9	DNAJC9	0.000117897	0.000168162	0.000663578	0.000431532	0.000326199	0.000339723	0.000192114
DNSL1_HUMAN	P49184	DNASE1L1 DNAS1L1 DNL1L	DNASE1L1	3.4502e-05	7.41892e-05	0	0.000124252	0	0	0
DNS2A_HUMAN	O00115	DNASE2 DNASE2A DNL2	DNASE2	0	0	0	0.000161824	0	0	0
DNER_HUMAN	Q8NFT8	DNER BET UNQ262/PRO299	DNER	0	0	0	0	0	0.000183058	0
DYN1_HUMAN	Q05193	DNM1 DNM	DNM1	0	0	0	0	1.5521e-05	0	0
DNM1L_HUMAN	O00429	DNM1L DLP1 DRP1	DNM1L	0.000114554	0	2.69747e-05	0.000118408	3.67203e-05	0	0
DYN2_HUMAN	P50570	DNM2 DYN2	DNM2	0.000125686	0	2.25707e-05	3.30254e-05	0	0	0
DNMBP_HUMAN	Q6XZF7	DNMBP ARHGEF36 KIAA1010 TUBA	DNMBP	2.651e-05	0	0	0	0	0	0
DNMT1_HUMAN	P26358	DNMT1 AIM CXXC9 DNMT	DNMT1	1.44713e-05	4.13514e-05	0	0	5.34752e-05	0	0
DNPEP_HUMAN	Q9ULA0	DNPEP ASPEP DAP	DNPEP	7.92402e-05	7.27625e-05	8.50741e-05	0.000162483	5.79051e-05	0	6.65012e-05
DNPH1_HUMAN	O43598	DNPH1 C6orf108 RCL	DNPH1	0	0	0	0	0.000158477	0	0
TDIF1_HUMAN	Q9H147	DNTTIP1 C20orf167 TDIF1	DNTTIP1	0	0	0	0	0.000183105	0	9.34611e-05
DOCK5_HUMAN	Q9H7D0	DOCK5	DOCK5	5.45612e-06	0	0	0	0	0	0
DOCK7_HUMAN	Q96N67	DOCK7 KIAA1771	DOCK7	2.89646e-05	2.07608e-05	0	0	0	0	0
DPCD_HUMAN	Q9BVM2	DPCD	DPCD	0	0	0	0.000140717	0	0	0
REQU_HUMAN	Q92785	DPF2 BAF45D REQ UBID4	DPF2	0	0	0.000150813	0	6.84334e-05	0	0
DPM1_HUMAN	O60762	DPM1	DPM1	0.00020568	0.000294284	0.000147462	0.000215766	0	9.51902e-05	0
DPM3_HUMAN	Q9P2X0	DPM3	DPM3	0	0.000378365	0	0	0.000150553	0	0
DPP3_HUMAN	Q9NY33	DPP3	DPP3	9.89333e-05	0	0	0	9.97643e-05	0	0
DPP4_HUMAN	P27487	DPP4 ADCP2 CD26	DPP4	0.000284409	0.000257976	0	0.00239247	0	0	0
DPP2_HUMAN	Q9UHL4	DPP7 DPP2 QPP	DPP7	4.34469e-05	0	0	0	2.78803e-05	0	0
DPY30_HUMAN	Q9C005	DPY30	DPY30	0	0	0.000603253	0.000294226	0.000342167	0	0
DPYL2_HUMAN	Q16555	DPYSL2 CRMP2 ULIP2	DPYSL2	0.0005592	0.000122053	0.000137444	0.000678618	0.000594929	0.000440741	0.00065071
DPYL3_HUMAN	Q14195	DPYSL3 CRMP4 DRP3 ULIP ULIP1	DPYSL3	0.000170522	0	0.000107029	0.000600316	0.000121414	0.000144689	0.000725077
DPYL4_HUMAN	O14531	DPYSL4 CRMP3 ULIP4	DPYSL4	0	0	0	0	2.42828e-05	0	0
NC2B_HUMAN	Q01658	DR1	DR1	0	0	0	0.000170341	0	0	0
NC2A_HUMAN	Q14919	DRAP1	DRAP1	0	0	0	0	0.00010265	0	0
DRG1_HUMAN	Q9Y295	DRG1 NEDD3	DRG1	0.000128751	0.000153807	0.000185641	0	9.18008e-05	0.000248578	0
DRG2_HUMAN	P55039	DRG2	DRG2	2.86114e-05	0	0	0	0	0	0
DSC1_HUMAN	Q08554	DSC1 CDHF1	DSC1	0.000276881	0.00017657	0.000148311	0.00021821	0.000105387	0.000413976	0.000610924
DSC3_HUMAN	Q14574	DSC3 CDHF3 DSC4	DSC3	0.000106107	0	2.21193e-05	4.85473e-05	0	5.71141e-05	0.000161376
DSG1_HUMAN	Q02413	DSG1 CDHF4	DSG1	0.000759659	0.000276583	0.000628277	0.000698633	0.000310351	0.00101975	0.00122347
DSG2_HUMAN	Q14126	DSG2 CDHF5	DSG2	2.89911e-05	0	1.81306e-05	0.000228985	0	0.000655408	0
DESP_HUMAN	P15924	DSP	DSP	0.000677122	0.000148155	0.000476139	0.000645637	0.000115636	0.00103636	0.000760357
DYST_HUMAN	Q03001	DST BP230 BP240 BPAG1 DMH DT KIAA0728	DST	4.08734e-06	2.92965e-06	0	4.90657e-06	0	0	0
DEST_HUMAN	P60981	DSTN ACTDP DSN	DSTN	0.00120782	0.00112846	0.000619692	0.000742788	0.000911244	0.000751235	0.000364006
DTD1_HUMAN	Q8TEA8	DTD1 C20orf88 DUEB HARS2	DTD1	5.10029e-05	0	9.61707e-05	0.000140717	0.000130916	0.000124161	0
KTHY_HUMAN	P23919	DTYMK CDC8 TMPK TYMK	DTYMK	0.000171072	0	0.000184327	0.000471988	6.27306e-05	0	0
DUS3L_HUMAN	Q96G46	DUS3L	DUS3L	0	0	0	4.43354e-05	6.18713e-05	0	0
DUS11_HUMAN	O75319	DUSP11 PIR1	DUSP11	0	0	0	0	5.1325e-05	0	0
DUS3_HUMAN	P51452	DUSP3 VHR	DUSP3	8.798e-05	0	0.000221193	0.000323649	7.52767e-05	0.000203834	0.000230537
DUT_HUMAN	P33316	DUT	DUT	0.000272308	0.000326982	0.000573463	0.00059935	0.000139401	0.000347386	8.53842e-05
DYHC1_HUMAN	Q14204	DYNC1H1 DHC1 DNCH1 DNCL DNECL DYHC KIAA0325	DYNC1H1	3.20615e-05	0	8.07025e-06	0.000185551	5.23541e-05	5.36787e-06	2.38337e-05
DC1I2_HUMAN	Q13409	DYNC1I2 DNCI2 DNCIC2	DYNC1I2	0.000111732	3.55272e-05	6.23078e-05	0.000159545	8.48188e-05	4.02212e-05	0
DC1L1_HUMAN	Q9Y6G9	DYNC1LI1 DNCLI1	DYNC1LI1	9.26105e-05	0	0	0	7.92386e-05	0	0
DC1L2_HUMAN	O43237	DYNC1LI2 DNCLI2 LIC2	DYNC1LI2	8.15723e-05	4.67117e-05	0.000122885	8.99024e-05	8.36408e-05	7.54941e-05	0
DYHC2_HUMAN	Q8NCM8	DYNC2H1 DHC1B DHC2 DNCH2 DYH1B KIAA1997	DYNC2H1	0	5.1165e-06	0	0	0	0	0
DYL1_HUMAN	P63167	DYNLL1 DLC1 DNCL1 DNCLC1 HDLC1	DYNLL1	0.000586533	0.000882851	0.00104072	0	0	0.000611502	0.000806881
DYL2_HUMAN	Q96FJ2	DYNLL2 DLC2	DYNLL2	0.00035192	0.000630608	0.000422813	0.000503368	0.00045166	0.000571141	0.00115269
DLRB1_HUMAN	Q9NP97	DYNLRB1 BITH DNCL2A DNLC2A ROBLD1 HSPC162	DYNLRB1	0.000267411	0.000229312	0.000402169	0.00102979	0.000273733	0.000630217	0.000209579
DYLT1_HUMAN	P63172	DYNLT1 TCTEL1 TCTEX-1 TCTEX1	DYNLT1	0.000195511	0	0	0	0	0	0
DYSF_HUMAN	O75923	DYSF FER1L1	DYSF	0	1.59648e-05	1.86661e-05	6.82803e-06	0	1.20494e-05	0
SYEM_HUMAN	Q5JPH6	EARS2 KIAA1970	EARS2	3.9765e-05	0	0	5.48557e-05	0	0	0
COE2_HUMAN	Q9HAK2	EBF2 COE2	EBF2	0	0	0	0.000154118	0	0.000181315	0
COE3_HUMAN	Q9H4W6	EBF3 COE3	EBF3	0	0	0	0	4.63241e-05	0	0
ECE1_HUMAN	P42892	ECE1	ECE1	8.0969e-05	0	0.000330518	0.000215963	0	0.000248501	9.27449e-05
ECH1_HUMAN	Q13011	ECH1	ECH1	0.000228506	0.00028027	0.000681216	0.000513157	0.000250922	0.000515473	0.00035221
ECHD1_HUMAN	Q9NTX5	ECHDC1	ECHDC1	3.4502e-05	0	0.000130113	0	0	8.39914e-05	0
ECHM_HUMAN	P30084	ECHS1	ECHS1	0.000474058	0.000325475	0.000514098	0.00151384	0.000315676	0.000197259	0.000297468
ECI1_HUMAN	P42126	ECI1 DCI	ECI1	0.000142548	0	9.65881e-05	0.000294226	0.000136867	0.000173073	0.00013972
ECI2_HUMAN	O75521	ECI2 DRS1 HCA88 PECI	ECI2	0.000213285	0	0.000100542	0.000183891	0	0	0
ECM1_HUMAN	Q16610	ECM1	ECM1	0.000212601	0	0.000181306	0.000159172	0	0.000280889	0.000113379
ECM29_HUMAN	Q5VYK3	ECPAS ECM29 KIAA0368	ECPAS	5.33063e-05	0	0	1.58651e-05	0	1.99837e-05	0
EDC3_HUMAN	Q96F86	EDC3 LSM16 YJDC YJEFN2 PP844	EDC3	0	0	0	0	6.72113e-05	0	0
EDC4_HUMAN	Q6P2E9	EDC4 HEDLS	EDC4	3.4729e-05	0	0	2.12927e-05	3.96193e-05	0	0
EDEM3_HUMAN	Q9BZQ6	EDEM3 C1orf22	EDEM3	3.63935e-05	0	0	6.16474e-05	0	0	0
EDF1_HUMAN	O60869	EDF1	EDF1	0.000257531	0	0.000406581	0.00121368	0.000799815	0.000509585	0.000288172
EDIL3_HUMAN	O43854	EDIL3 DEL1	EDIL3	0	9.34234e-05	0	7.82326e-05	0	0	0
EDNRA_HUMAN	P25101	EDNRA ETA ETRA	EDNRA	0	0	0	0	0	0.000116559	0
EEA1_HUMAN	Q15075	EEA1 ZFYVE2	EEA1	0.00026483	0.000108994	0.000128906	0.000279541	8.82875e-05	8.81391e-05	0
EF1A1_HUMAN	P68104	EEF1A1 EEF1A EF1A LENG7	EEF1A1	0.00192914	0.0018666	0.00233787	0.0015888	0.00236369	0.00250353	0.00260507
EF1A2_HUMAN	Q05639	EEF1A2 EEF1AL STN	EEF1A2	0.000964689	0.000908076	0	0	0.00150553	0.00207911	0.00177514
EF1B_HUMAN	P24534	EEF1B2 EEF1B EF1B	EEF1B2	0.000564843	0.000554935	0.000559443	0.000606764	0.000391439	0.000424015	0.00036886
EF1D_HUMAN	P29692	EEF1D EF1D	EEF1D	0.000862784	0.000773004	0.000797403	0.000798143	0.00126271	0.000986294	0.000594935
MCA3_HUMAN	O43324	EEF1E1 AIMP3 P18	EEF1E1	0.000146928	0	0	0	0	0	0
EF1G_HUMAN	P26641	EEF1G EF1G PRO1608	EEF1G	0.000970082	0.000706281	0.00086905	0.000527214	0.00090332	0.00076236	0.000576343
EF2_HUMAN	P13639	EEF2 EF2	EEF2	0.0012444	0.00069035	0.00113186	0.00115681	0.00202058	0.00138202	0.00140749
EFCB3_HUMAN	Q8N7B9	EFCAB3	EFCAB3	4.69227e-05	0	0.00037466	0	0	0.000407668	0
FBLN3_HUMAN	Q12805	EFEMP1 FBLN3 FBNL	EFEMP1	8.53139e-05	0	0	0.000617875	0	0	0
EFHD1_HUMAN	Q9BUP0	EFHD1 SWS2 PP3051	EFHD1	0	0	0.00024577	0	0	0.000423068	0
EFHD2_HUMAN	Q96C19	EFHD2 SWS1	EFHD2	0.000545054	0.000513829	0.000609592	0.000594307	0.000223042	0.000868558	0.000384229
EFNA5_HUMAN	P52803	EFNA5 EPLG7 LERK7	EFNA5	0	0	0.000170148	6.22401e-05	0.000202668	0.00021967	0.000133002
EFNB1_HUMAN	P98172	EFNB1 EFL3 EPLG2 LERK2	EFNB1	0.0003101	0.000199139	0.000232834	0.000189843	5.9429e-05	0.000128791	0
EFNB2_HUMAN	P52799	EFNB2 EPLG5 HTKL LERK5	EFNB2	0.000127456	0.000374956	0.000298909	8.74726e-05	0	0	0
EFR3A_HUMAN	Q14156	EFR3A KIAA0143	EFR3A	3.80313e-05	0	0	0	0	0	0
U5S1_HUMAN	Q15029	EFTUD2 KIAA0031 SNRP116	EFTUD2	0.000121344	9.25663e-05	0.000347345	0.000119787	0.000359118	0.000226302	0.000232652
EGFR_HUMAN	P00533	EGFR ERBB ERBB1 HER1	EGFR	0.000687926	0.000677668	0.000321351	0.000154962	0.000129206	0.00125123	5.16128e-05
EHBP1_HUMAN	Q8NDI1	EHBP1 KIAA0903 NACSIN	EHBP1	1.67581e-05	0	0	0	0	0	0
EH1L1_HUMAN	Q8N3D4	EHBP1L1	EHBP1L1	0	0	0	0	9.29342e-06	0	0
EHD1_HUMAN	Q9H4M9	EHD1 PAST PAST1 CDABP0131	EHD1	0.000240383	4.13514e-05	0	0	0	0	0
EHD2_HUMAN	Q9NZN4	EHD2 PAST2	EHD2	0.000577644	0.000206757	0	0	0	0	0
EHD4_HUMAN	Q9H223	EHD4 HCA10 HCA11 PAST4 FKSG7	EHD4	9.6153e-05	0	0	7.95858e-05	0	0	0
EIF1_HUMAN	P41567	EIF1 SUI1	EIF1	0.00022559	0	0	0	0	0	0
IF1AX_HUMAN	P47813	EIF1AX EIF1A EIF4C	EIF1AX	0.000238833	0	0.000138245	0.00020228	0	0	0
IF1AY_HUMAN	O14602	EIF1AY	EIF1AY	0	0	0	0	0.000517527	0	0.000144086
EIF2A_HUMAN	Q9BY44	EIF2A CDA02 MSTP004 MSTP089	EIF2A	9.92595e-05	0	0	7.46882e-05	4.63241e-05	0	0
E2AK2_HUMAN	P19525	EIF2AK2 PKR PRKR	EIF2AK2	7.56817e-05	0	0	5.22014e-05	7.28484e-05	4.60598e-05	0
E2AK4_HUMAN	Q9P2K8	EIF2AK4 GCN2 KIAA1338	EIF2AK4	0	0	0	0	0	0	1.23282e-05
EI2BA_HUMAN	Q14232	EIF2B1 EIF2BA	EIF2B1	6.90039e-05	0	0.000130113	0.000142786	0.000199262	8.39914e-05	6.78051e-05
EI2BB_HUMAN	P49770	EIF2B2 EIF2BB	EIF2B2	4.5118e-05	0	0	0	3.86034e-05	0	0
EI2BG_HUMAN	Q9NR50	EIF2B3	EIF2B3	3.5192e-05	0	0	0	6.02214e-05	0	0
EI2BD_HUMAN	Q9UI10	EIF2B4 EIF2BD	EIF2B4	0	0	0	0	6.48937e-05	0	0
EI2BE_HUMAN	Q13144	EIF2B5 EIF2BE	EIF2B5	0	0	0	0	4.70479e-05	0	0
EIF2D_HUMAN	P41214	EIF2D HCA56 LGTN	EIF2D	2.70708e-05	0	0	0	0	0	0
IF2A_HUMAN	P05198	EIF2S1 EIF2A	EIF2S1	0.000375632	0.00028027	0.000355969	0.000335243	0.000899138	0.000452965	0.00035221
IF2B_HUMAN	P20042	EIF2S2 EIF2B	EIF2S2	0.000162379	0.000232329	0.000256788	0.000298098	0.000435812	0.000321843	6.06677e-05
IF2G_HUMAN	P41091	EIF2S3 EIF2G	EIF2S3	0.000374466	0.000321487	0.000335456	0.000120743	0.000738007	0.000599512	0.000429432
EIF3A_HUMAN	Q14152	EIF3A EIF3S10 KIAA0139	EIF3A	0.000244397	3.02088e-05	3.97352e-05	0.000164731	0.000576971	9.76451e-05	0.000227776
EIF3B_HUMAN	P55884	EIF3B EIF3S9	EIF3B	0.000204332	9.59621e-05	0.000118086	0.000123127	0.000638215	0.000243715	0.000275642
EIF3C_HUMAN	Q99613	EIF3C EIF3S8	EIF3C	0.000156634	3.60348e-05	0	0	0.000458829	0.000174715	0.000186625
EIFCL_HUMAN	B5ME19	EIF3CL	EIF3CL	0	0	6.31979e-05	0.000107883	0	0	0
EIF3D_HUMAN	O15371	EIF3D EIF3S7	EIF3D	0.000164963	3.9413e-05	0	0	0.000411669	0.000127396	0.000126075
EIF3E_HUMAN	P60228	EIF3E EIF3S6 INT6	EIF3E	0.000203598	0	0.000226426	0.000280081	0.000361907	0.000313591	0.000110835
EIF3F_HUMAN	O00303	EIF3F EIF3S5	EIF3F	0.000263018	0	0.000232834	0.000340683	0.000297145	0.000482765	6.06677e-05
EIF3G_HUMAN	O75821	EIF3G EIF3S4	EIF3G	0.000171482	0.000105101	0.000307212	0.000494463	0.000899138	0.000113241	0.000256153
EIF3H_HUMAN	O15372	EIF3H EIF3S3	EIF3H	0.000183661	6.30608e-05	0.000300878	0.000485473	0.000602214	0.000203834	0.000230537
EIF3I_HUMAN	Q13347	EIF3I EIF3S2 TRIP1	EIF3I	0.000150756	0.000136348	0.000179345	0.000218682	0.000447591	0.000165271	0.000186922
EIF3J_HUMAN	O75822	EIF3J EIF3S1 PRO0391	EIF3J	0.000192751	0.000260941	0.000336481	0.000390611	0.000856597	0.000421726	0.000516722
EIF3K_HUMAN	Q9UBQ5	EIF3K EIF3S12 ARG134 HSPC029 MSTP001 PTD001	EIF3K	0.000140768	0.000151346	8.84771e-05	0	0.000421549	0.000293643	0.000230537
EIF3L_HUMAN	Q9Y262	EIF3L EIF3EIP EIF3S6IP HSPC021 HSPC025 MSTP005	EIF3L	0.00021041	0	3.30138e-05	0	0.000348295	0.000182538	0
EIF3M_HUMAN	Q7L2H7	EIF3M HFLB5 PCID1 GA17 PNAS-125	EIF3M	0.00012972	0	0	0	0.000577705	0	0.000107227
IF4A1_HUMAN	P60842	EIF4A1 DDX2A EIF4A	EIF4A1	0.00109314	0.000712861	0.000876747	0.000569168	0.00114551	0.000682445	0.000726694
IF4A2_HUMAN	Q14240	EIF4A2 DDX2B EIF4F	EIF4A2	0.000703471	0.000575773	0.000806037	0.000527688	0.000834589	0.000527354	0.000576343
IF4A3_HUMAN	P38919	EIF4A3 DDX48 KIAA0111	EIF4A3	0.000244103	0.00024151	0.00049964	0.000187921	0.000288294	0.00082401	0.000196202
IF4B_HUMAN	P23588	EIF4B	EIF4B	0.000234319	0.000493519	0.000329979	0.000206509	0.000294561	0.000233478	0.000350818
IF4E_HUMAN	P06730	EIF4E EIF4EL1 EIF4F	EIF4E	9.38453e-05	0	0	0	0.000120443	0	0
IF4E2_HUMAN	O60573	EIF4E2 EIF4EL3	EIF4E2	4.18952e-05	0	0	0	0	0	0
IF4G1_HUMAN	Q04637	EIF4G1 EIF4F EIF4G EIF4GI	EIF4G1	0.000221696	0.000108104	4.94399e-05	0.000240425	0.000206473	0.000174715	9.88017e-05
IF4G2_HUMAN	P78344	EIF4G2 DAP5 OK/SW-cl.75	EIF4G2	0.000106584	0	2.16856e-05	7.93257e-05	0.000125461	0	0
IF4G3_HUMAN	O43432	EIF4G3	EIF4G3	5.63337e-05	0	0	3.65705e-05	3.40234e-05	0	0
IF4H_HUMAN	Q15056	EIF4H KIAA0038 WBSCR1 WSCR1	EIF4H	0.000184977	0	0.000327693	0.00113876	0.000334563	0.000347386	0.000298845
IF5_HUMAN	P55010	EIF5	EIF5	0.000120002	5.14782e-05	0.000270848	0.000165127	0.000168988	0.000249593	0.00016467
IF5A1_HUMAN	P63241	EIF5A	EIF5A	0.00161042	0.000445135	0.000700273	0.00152305	0.000929889	0.000671632	0.000339025
IF5A2_HUMAN	Q9GZV4	EIF5A2	EIF5A2	0	0	0.000260227	0.000761526	0	0.000335965	0
IF2P_HUMAN	O60841	EIF5B IF2 KIAA0741	EIF5B	7.18192e-05	7.2588e-05	4.77394e-05	4.65682e-05	0.000129974	2.93286e-05	2.48781e-05
IF6_HUMAN	P56537	EIF6 EIF3A ITGB4BP OK/SW-cl.27	EIF6	0.000152283	0.000326982	0.000277066	0.000405354	0.000529725	0.000271891	0.000298845
RNZ2_HUMAN	Q9BQ52	ELAC2 HPC2	ELAC2	2.56298e-05	0	0.00026447	0	9.8187e-05	4.43118e-05	2.50584e-05
ELNE_HUMAN	P08246	ELANE ELA2	ELANE	0.000284579	0	0	0	0	0	0
ELAP2_HUMAN	A8MWY0	ELAPOR2 EIG121L KIAA1324L	ELAPOR2	0	0	7.76115e-05	0	0	0	0.000101113
ELAV1_HUMAN	Q15717	ELAVL1 HUR	ELAVL1	0.000277302	0.00028027	0.000357781	0.000222865	0.000250922	0.000209524	0.000128076
ELMO2_HUMAN	Q96JJ3	ELMO2 CED12A KIAA1834	ELMO2	5.65333e-05	0	0	0	0	0	0
ELMD2_HUMAN	Q8IZ81	ELMOD2	ELMOD2	0	0	0	9.24711e-05	0	0	0
ELOB_HUMAN	Q15370	ELOB TCEB2	ELOB	0.000249057	0	0.00170148	0.000995842	0.000289526	0.00100404	0.000177336
ELOC_HUMAN	Q15369	ELOC TCEB1	ELOC	0.000293267	0	0	0.000404561	0.000439114	0	0.000384229
ELOV1_HUMAN	Q9BW60	ELOVL1 SSC1 CGI-88	ELOVL1	5.33212e-05	0	0	0	0	0	0
ELP1_HUMAN	O95163	ELP1 IKAP IKBKAP	ELP1	7.82045e-06	0	0	0	4.5166e-05	0	0
ELP2_HUMAN	Q6IA86	ELP2 STATIP1	ELP2	0	0	0	0	3.2729e-05	0	0
ELP3_HUMAN	Q9H9T3	ELP3	ELP3	0	0	0	0	7.28484e-05	0	0
EMB_HUMAN	Q6PCB8	EMB	EMB	0	0	0.000168766	0.000306154	0	0.00108054	0
EMC1_HUMAN	Q8N766	EMC1 KIAA0090 PSEC0263	EMC1	0.000110107	0	7.72499e-05	0.000115589	2.01634e-05	0	0
EMC10_HUMAN	Q5UCC4	EMC10 C19orf63 INM02 UNQ764/PRO1556	EMC10	6.51704e-05	0	0.000163846	0.000299675	0	0.000105767	0
EMC2_HUMAN	Q15006	EMC2 KIAA0103 TTC35	EMC2	6.70324e-05	0	0	9.24711e-05	0	0	0
EMC3_HUMAN	Q9P0I2	EMC3 TMEM111	EMC3	9.77556e-05	0	0	0	0	0	0
EMC4_HUMAN	Q5J8M3	EMC4 TMEM85 HSPC184 PIG17	EMC4	0.000117307	0	0	0.000161824	0	0	0
EMC6_HUMAN	Q9BV81	EMC6 TMEM93	EMC6	9.77556e-05	0	0.000368655	0.000134854	0	0	0
EMC7_HUMAN	Q9NPA0	EMC7 C11orf3 C15orf24 HT022 UNQ905/PRO1926	EMC7	0.000203031	0	0	0.00018672	0	0	0
EMC8_HUMAN	O43402	EMC8 C16orf2 C16orf4 COX4AL COX4NB FAM158B NOC4	EMC8	7.33167e-05	0	0	0	0	0	0
EMC9_HUMAN	Q9Y3B6	EMC9 C14orf122 FAM158A CGI-112	EMC9	0	0	9.61707e-05	0	0	0	0
EMD_HUMAN	P50402	EMD EDMD STA	EMD	0.000446076	0.000869804	0.000450891	0.000558015	0.000155745	0.000344479	7.94956e-05
NEP1_HUMAN	Q92979	EMG1 C2F	EMG1	0	0	0.000327693	0	8.36408e-05	0	0
EMIL1_HUMAN	Q9Y6C2	EMILIN1 EMI	EMILIN1	0	0	4.13444e-05	0	0.000436183	0	0
EMAL2_HUMAN	O95834	EML2 EMAP2 EMAPL2	EML2	0	0	0	6.83765e-05	0	0	0
EMAL4_HUMAN	Q9HC35	EML4 C2orf2 EMAPL4	EML4	2.69052e-05	0	0	0	6.90612e-05	5.61011e-05	0
EMP3_HUMAN	P54852	EMP3 YMP	EMP3	0.000261993	0	0	8.99024e-05	0	0.000475951	0
ENAH_HUMAN	Q8N8S7	ENAH MENA	ENAH	0.000100806	5.64724e-05	0.000264111	0.000140215	0.000303354	0.000121692	0.000189247
ENDD1_HUMAN	O94919	ENDOD1 KIAA0830	ENDOD1	0.000106642	4.58624e-05	0	0.000205958	5.47467e-05	0	0
NUCG_HUMAN	Q14249	ENDOG	ENDOG	0	0	0.000134056	0	0	0	0
EGLN_HUMAN	P17813	ENG END	ENG	0.00116529	0.0017586	0.000965683	0.00116566	0	0.00180981	0.00012988
ENOA_HUMAN	P06733	ENO1 ENO1L1 MBPB1 MPB1	ENO1	0.00282732	0.00206625	0.00299638	0.00282299	0.00262668	0.00336571	0.00235442
ENOG_HUMAN	P09104	ENO2	ENO2	0.000563082	0	0.000429046	0.000500156	0	0.000641947	0
ENOB_HUMAN	P13929	ENO3	ENO3	0.000474218	0	0.000517685	0.000413169	0.000832848	0.000243039	0.000613131
ENPP1_HUMAN	P22413	ENPP1 M6S1 NPPS PC1 PDNP1	ENPP1	8.41559e-05	0.00122518	0.000231726	0	0	0.000250492	2.19559e-05
ENPP4_HUMAN	Q9Y6X5	ENPP4 KIAA0879 NPP4	ENPP4	0	0	0	0	0	0	0
ENY2_HUMAN	Q9NPA8	ENY2 DC6	ENY2	9.77556e-05	0.000315304	0	0	0.000376383	0	0.000288172
EOGT_HUMAN	Q5NDL2	EOGT AER61 C3orf64 EOGT1	EOGT	0	0	0	5.22014e-05	0	0	0
EPB41_HUMAN	P11171	EPB41 E41P	EPB41	3.02337e-05	0	4.56067e-05	0	6.98444e-05	0	0
E41L1_HUMAN	Q9H4G0	EPB41L1 KIAA0338	EPB41L1	5.95439e-05	0	0	0	0	0	0
E41L2_HUMAN	O43491	EPB41L2	EPB41L2	0.000301993	0.000178579	0.000281522	7.31873e-05	0.000266466	0.00045096	0.000122409
E41L3_HUMAN	Q9Y2J2	EPB41L3 DAL1 KIAA0987	EPB41L3	0.000325604	0	3.4404e-05	0	0.000479033	0	0
EPCAM_HUMAN	P16422	EPCAM GA733-2 M1S2 M4S1 MIC18 TACSTD1 TROP1	EPCAM	0	0	0.000189594	0	0	0	0
EPDR1_HUMAN	Q9UM22	EPDR1 MERP1 UCC1	EPDR1	0.000223827	0.000454038	0.000265431	0.000675929	0	0.00105247	0.00018443
EPHA2_HUMAN	P29317	EPHA2 ECK	EPHA2	0.000117174	0.000665642	0.000392127	0.000260721	0.000104551	0.000421058	0.000149422
EPHA3_HUMAN	P29320	EPHA3 ETK ETK1 HEK TYRO4	EPHA3	3.21537e-05	4.58624e-05	0	0	5.47467e-05	0	3.14369e-05
EPHA4_HUMAN	P54764	EPHA4 HEK8 SEK TYRO1	EPHA4	0	0	6.03253e-05	5.76076e-05	0	0.000129805	0.000167664
EPHA5_HUMAN	P54756	EPHA5 BSK EHK1 HEK7 TYRO4	EPHA5	0	4.38684e-05	0.000115405	0	0	7.44967e-05	0
EPHA7_HUMAN	Q15375	EPHA7 EHK3 HEK11	EPHA7	0.000157898	0	0.00029624	5.77944e-05	3.36057e-05	0.000331421	0.000319047
EPHB1_HUMAN	P54762	EPHB1 ELK EPHT2 HEK6 NET	EPHB1	4.28716e-05	0	0	0	0	0	0
EPHB2_HUMAN	P29323	EPHB2 DRT EPHT3 EPTH3 ERK HEK5 TYRO5	EPHB2	0.000105603	0.000377287	0.000340296	0.000224357	2.57356e-05	0.00057177	0
EPHB3_HUMAN	P54753	EPHB3 ETK2 HEK2 TYRO6	EPHB3	0	0.000114656	0.00017801	5.88452e-05	0	0.000337493	0
EPHB4_HUMAN	P54760	EPHB4 HTK MYK1 TYRO11	EPHB4	4.36382e-05	9.34234e-05	0.000163846	0	0	0.000370184	3.20191e-05
HYEP_HUMAN	P07099	EPHX1 EPHX EPOX	EPHX1	0.000138556	0	0	0.000702257	0	0	0
HYES_HUMAN	P34913	EPHX2	EPHX2	2.79302e-05	0	0	0	0	0	0
EPN1_HUMAN	Q9Y6I3	EPN1	EPN1	0.000161985	0.000168162	0.000294924	0.000140819	3.76383e-05	0	0
EPN2_HUMAN	O95208	EPN2 KIAA1065	EPN2	0.000121365	0	0.00039034	0.000141785	2.21402e-05	4.19957e-05	0
EPN3_HUMAN	Q9H201	EPN3	EPN3	0	0	0.00019517	0	0	0	0
EPIPL_HUMAN	P58107	EPPK1 EPIPL	EPPK1	1.69636e-05	0	7.95657e-06	1.1642e-05	0	0	0
SYEP_HUMAN	P07814	EPRS1 EPRS GLNS PARS QARS QPRS PIG32	EPRS1	0.000295465	2.21266e-05	4.37473e-05	6.62439e-05	0.000167282	0.000166882	5.39269e-05
EPS15_HUMAN	P42566	EPS15 AF1P	EPS15	4.14721e-05	5.09582e-05	8.93708e-05	9.80754e-05	0	0	0
EP15R_HUMAN	Q9UBC2	EPS15L1 EPS15R	EPS15L1	7.48766e-05	0.000107338	0.000235311	0	6.40653e-05	0.000121519	0
EPS8_HUMAN	Q12929	EPS8	EPS8	6.37536e-05	0	0	0	0	0	0
ERAL1_HUMAN	O75616	ERAL1 HERA	ERAL1	0	0	0	0	0	0	4.80286e-05
ERAP1_HUMAN	Q9NZ08	ERAP1 APPILS ARTS1 KIAA0525 UNQ584/PRO1154	ERAP1	6.87133e-05	0	0.000103361	0	0	0	0
ERAP2_HUMAN	Q6P179	ERAP2 LRAP	ERAP2	0	0	0	0.00022067	0	0	0
ERBB2_HUMAN	P04626	ERBB2 HER2 MLN19 NEU NGL	ERBB2	4.26735e-05	0.000100532	1.60285e-05	1.17264e-05	0	6.20806e-05	0
ERBB3_HUMAN	P21860	ERBB3 HER3	ERBB3	0	0	2.98909e-05	0	0	0	0
ERBB4_HUMAN	Q15303	ERBB4 HER4	ERBB4	0	0	1.50471e-05	0	0	9.71329e-05	0
ERBIN_HUMAN	Q96RT1	ERBIN ERBB2IP KIAA1225 LAP2	ERBIN	6.68203e-05	0	0	0	0	0	0
RB6I2_HUMAN	Q8IUD2	ERC1 ELKS KIAA1081 RAB6IP2	ERC1	2.74938e-05	0	3.45614e-05	2.52851e-05	4.11669e-05	2.23102e-05	0
ERCC3_HUMAN	P19447	ERCC3 XPB XPBC	ERCC3	0	0	0	0	4.22903e-05	0	0
EREG_HUMAN	O14944	EREG	EREG	0	0.00013276	0	0	0	0	0
ERGI1_HUMAN	Q969X5	ERGIC1 ERGIC32 KIAA1181 HT034	ERGIC1	0.000284827	0.000191093	0.000201084	0.000260159	4.56222e-05	8.65365e-05	0
ERGI2_HUMAN	Q96RQ1	ERGIC2 ERV41 PTX1 CDA14	ERGIC2	9.54822e-05	0	0	0	0	0	0
ERGI3_HUMAN	Q9Y282	ERGIC3 C20orf47 ERV46 SDBCAG84 CGI-54 PRO0989	ERGIC3	0.000102508	0	7.41258e-05	0	3.50124e-05	0.000132824	0
ERH_HUMAN	P84090	ERH	ERH	0.000342636	0.000630608	0.000612525	0.000689181	0.000501845	0.000407837	0.000864515
ERLEC_HUMAN	Q96DZ1	ERLEC1 C2orf30 XTP3TPB UNQ1878/PRO4321	ERLEC1	7.46497e-05	0	0	8.82678e-05	0	0	0
ERLN1_HUMAN	O75477	ERLIN1 C10orf69 KE04 KEO4 SPFH1	ERLIN1	0.000240856	0	0.000170148	0.000414934	0	0	0
ERLN2_HUMAN	O94905	ERLIN2 C8orf2 SPFH2 UNQ2441/PRO5003/PRO9924	ERLIN2	0.000363268	0	0.000251637	0.00055361	5.9429e-05	0.000214562	0
ERMP1_HUMAN	Q7Z2K6	ERMP1 FXNA KIAA1815	ERMP1	2.35794e-05	0	2.21193e-05	6.47297e-05	0	0	0
ERO1A_HUMAN	Q96HE7	ERO1A ERO1L UNQ434/PRO865	ERO1A	0.000315373	9.34234e-05	0.000138533	0.0011088	8.36408e-05	0.000105767	4.26921e-05
ERP29_HUMAN	P30040	ERP29 C12orf8 ERP28	ERP29	0.000506854	0.000260941	0.00141995	0.00107492	0.000285532	0.000914264	0.000238487
ERP44_HUMAN	Q9BS26	ERP44 KIAA0573 TXNDC4 UNQ532/PRO1075	ERP44	0.000249965	0.000268344	0.000434599	0.000585322	0.000176179	0.000212551	9.8101e-05
ESTD_HUMAN	P10768	ESD	ESD	0.000151363	0	0	0.000208806	0.000364242	0	0.00011155
ESF1_HUMAN	Q9H501	ESF1 ABTAP C20orf6 HDCMC28P	ESF1	0	0	4.46854e-05	0	3.80185e-05	0	0
ESPN_HUMAN	B1AK53	ESPN DFNB36 LP2654	ESPN	1.27507e-05	0	0	0	0	0	0
ESYT1_HUMAN	Q9BSJ8	ESYT1 FAM62A KIAA0747 MBC2	ESYT1	0.000377748	0.000246091	0.000175588	0.000137036	0.000134641	9.44679e-05	7.49715e-05
ESYT2_HUMAN	A0FGR8	ESYT2 FAM62B KIAA1228	ESYT2	0.000103795	3.70946e-05	6.50567e-05	6.34605e-05	1.47601e-05	0	0
ERF1_HUMAN	P62495	ETF1 ERF1 RF1 SUP45L1	ETF1	7.19409e-05	0	9.02827e-05	0.000132102	7.68129e-05	8.31976e-05	9.40969e-05
ETFA_HUMAN	P13804	ETFA	ETFA	0.000578829	0	0.000241607	0.000878475	0.000150553	0.00013983	0.000131736
ETFB_HUMAN	P38117	ETFB FP585	ETFB	0.000650641	0	0.000299679	0.00167604	0.000241961	0	0.000329339
ETFD_HUMAN	Q16134	ETFDH	ETFDH	2.58765e-05	0	0	9.51908e-05	0	0	0
ETHE1_HUMAN	O95571	ETHE1 HSCO	ETHE1	0.00013637	9.00869e-05	0	0.000404561	0	0	0
EVA1A_HUMAN	Q9H8M9	EVA1A FAM176A TMEM166 SP24	EVA1A	0.000138702	0	0	0	0	0	0
EVA1B_HUMAN	Q9NVM1	EVA1B C1orf78 FAM176B	EVA1B	0.000114376	0	0	0	0	0	0
EVI2B_HUMAN	P34910	EVI2B EVDB	EVI2B	0	0	0	6.60508e-05	0	0	0
EVI5_HUMAN	O60447	EVI5 NB4S	EVI5	0	0	2.37842e-05	0	0	6.1413e-05	2.4789e-05
EWS_HUMAN	Q01844	EWSR1 EWS	EWSR1	0.000316133	0.000296757	0.000128194	9.05572e-05	0.000210332	7.19713e-05	0.000355977
EXOC1_HUMAN	Q9NV70	EXOC1 SEC3 SEC3L1 BM-012	EXOC1	2.30013e-05	0	0	0	0	0	0
EXOC3_HUMAN	O60645	EXOC3 SEC6 SEC6L1	EXOC3	3.41008e-05	0	0	0	0	0	0
EX3L4_HUMAN	Q17RC7	EXOC3L4 C14orf73	EXOC3L4	1.46633e-05	0	0	0	0	0	0
EXOC4_HUMAN	Q96A65	EXOC4 KIAA1699 SEC8 SEC8L1	EXOC4	2.64204e-05	0	0	2.91575e-05	0	0	0
EXOC5_HUMAN	O00471	EXOC5 SEC10 SEC10L1	EXOC5	2.14585e-05	0	0	0	0	0	0
EXOC6_HUMAN	Q8TAG9	EXOC6 SEC15A SEC15L SEC15L1	EXOC6	3.11986e-05	0	0	0	0	0	0
EXC6B_HUMAN	Q9Y2D4	EXOC6B KIAA0919 SEC15B SEC15L2	EXOC6B	3.11986e-05	0	0	0	0	0	0
EXOC7_HUMAN	Q9UPT5	EXOC7 EXO70 KIAA1067	EXOC7	6.36e-05	0	0	0	0	0	0
EXOC8_HUMAN	Q8IYI6	EXOC8	EXOC8	5.72228e-05	0	0	0	0	0	0
EXOG_HUMAN	Q9Y2C4	EXOG ENDOGL1 ENDOGL2 ENGL	EXOG	2.86114e-05	0	0	0	0	0	0
EXOS1_HUMAN	Q9Y3B2	EXOSC1 CSL4 CGI-108	EXOSC1	0	0	0	0	0.000143384	0	0
EXOSX_HUMAN	Q01780	EXOSC10 PMSCL PMSCL2 RRP6	EXOSC10	1.16145e-05	0	0	0	2.98126e-05	0	0
EXOS2_HUMAN	Q13868	EXOSC2 RRP4	EXOSC2	5.33212e-05	0.000152875	0.000130102	9.80754e-05	9.12445e-05	0.000123536	6.98598e-05
EXOS4_HUMAN	Q9NPD3	EXOSC4 RRP41 SKI6	EXOSC4	4.5118e-05	0.000242542	0.000205157	0.000162483	0.000173715	0.000235193	8.86682e-05
EXOS5_HUMAN	Q9NQT4	EXOSC5 CML28 RRP46	EXOSC5	7.0384e-05	0.000151346	0	0	0.000180664	0.000252876	0
EXOS6_HUMAN	Q5RKV6	EXOSC6 MTR3	EXOSC6	0.000104949	0.000225217	0.000306669	5.77944e-05	0.000161307	0.000145596	0.000123502
EXOS7_HUMAN	Q15024	EXOSC7 KIAA0116 RRP42	EXOSC7	5.49875e-05	0.000157652	0.000345614	5.05701e-05	0.000141144	0.000178482	0
EXOS8_HUMAN	Q96B26	EXOSC8 OIP2 RRP43	EXOSC8	0	8.40811e-05	0.000221193	5.39415e-05	7.52767e-05	9.51902e-05	0
EXOS9_HUMAN	Q06265	EXOSC9 PMSCL1	EXOSC9	7.21818e-05	5.14782e-05	0.000154	8.62155e-05	7.68129e-05	8.31976e-05	4.70484e-05
EXT2_HUMAN	Q93063	EXT2	EXT2	1.43057e-05	0	0	0	0	0	0
EXTL2_HUMAN	Q9UBQ6	EXTL2 EXTR2	EXTL2	0	0	0.000112511	0	0	0	0
EZRI_HUMAN	P15311	EZR VIL2	EZR	0.000536899	0.00036557	0.000462889	0.00156962	0.00032729	0.000856988	0.000517874
JAM1_HUMAN	Q9Y624	F11R JAM1 JCAM UNQ264/PRO301	F11R	0.000142905	0	0	0.00115215	0	0.000346146	0
F13A_HUMAN	P00488	F13A1 F13A	F13A1	5.68178e-05	0	0	0	0	0	0
THRB_HUMAN	P00734	F2	F2	1.67581e-05	0	0	0	0	0	0
TF_HUMAN	P13726	F3	F3	0	0	0	0.000418118	0	0	0
FA5_HUMAN	P12259	F5	F5	4.21061e-05	0	3.40744e-05	1.89947e-05	0	3.39965e-05	0
FABPH_HUMAN	P05413	FABP3 FABP11 MDGI	FABP3	0	0	0	0	0	0.000271779	0
FABP5_HUMAN	Q01469	FABP5	FABP5	0.000785193	0	0.00130106	0.00140533	0.000602214	0.00380761	0.000614766
FAF1_HUMAN	Q9UNN5	FAF1 UBXD12 UBXN3A CGI-03	FAF1	0	0	0	0	4.06901e-05	0	0
FAF2_HUMAN	Q96CS3	FAF2 ETEA KIAA0887 UBXD8 UBXN3B	FAF2	0.000171756	0	7.85451e-05	0.000183197	0	0.000115378	0
FAAA_HUMAN	P16930	FAH	FAH	9.58229e-05	8.22532e-05	0	0.000350312	4.90935e-05	0.000186242	5.01168e-05
FAHD1_HUMAN	Q6P587	FAHD1 C16orf36 YISKL	FAHD1	0.000188045	0	8.84771e-05	0.000258919	9.0332e-05	0	0
FAH2A_HUMAN	Q96GK7	FAHD2A CGI-105	FAHD2A	8.37905e-05	0	0	0.000231178	0	0	0
F110A_HUMAN	Q9BQ89	FAM110A C20orf55 F10	FAM110A	0	0	0	0	4.85656e-05	0	0
NXP20_HUMAN	Q8IWE2	FAM114A1 NOXP20	FAM114A1	0.000158943	6.2027e-05	0	0.000212229	0	0	0
F1142_HUMAN	Q9NRY5	FAM114A2 C5orf3	FAM114A2	4.81501e-05	0	0	0	4.106e-05	0	0
F120A_HUMAN	Q9NZB2	FAM120A C9orf10 KIAA0183 OSSA	FAM120A	0.000129807	0	0	0	4.31915e-05	3.34154e-05	0
HYCCI_HUMAN	Q9BYI3	FAM126A DRCTNNB1A	FAM126A	0	0	0	0	5.1915e-05	0	0
F135A_HUMAN	Q9P2D6	FAM135A KIAA1411	FAM135A	6.90039e-06	0	0	0	0	0	0
F136A_HUMAN	Q96C01	FAM136A	FAM136A	0.000146633	0	0.00110596	0.000303421	0	0.000892408	0
F16B1_HUMAN	Q5W0V3	FAM160B1 KIAA1600	FAM160B1	1.34835e-05	0	0	0	0	0	0
F162A_HUMAN	Q96A26	FAM162A C3orf28 E2IG5 DC16 FWP001	FAM162A	0.000448526	0	0	0.000571145	0	0.000167983	0
F168A_HUMAN	Q92567	FAM168A KIAA0280 TCRP1	FAM168A	0.000136035	0	0	0	0	0	0
F1711_HUMAN	Q5VUB5	FAM171A1 APCN C10orf38	FAM171A1	9.62424e-05	5.14782e-05	9.02827e-05	0.000107769	1.53626e-05	0	0
F1712_HUMAN	A8MVW0	FAM171A2	FAM171A2	4.06541e-05	0.000159464	0.000508489	0	5.1915e-05	7.02876e-05	0.000158991
F171B_HUMAN	Q6P995	FAM171B KIAA1946 NPD019	FAM171B	2.56298e-05	6.85444e-05	0.000144256	1.75896e-05	0	9.31209e-05	0
F174B_HUMAN	Q3ZCQ3	FAM174B	FAM174B	0	0	0.000650567	0	0	0	0
F177A_HUMAN	Q8N128	FAM177A1 C14orf24	FAM177A1	0	0	9.21636e-05	0.000337134	0	0	0
F184B_HUMAN	Q9ULE4	FAM184B KIAA1276	FAM184B	9.69477e-06	0	0	0	0	0	0
XYLK_HUMAN	O75063	FAM20B KIAA0475	FAM20B	6.37536e-05	0	0	0.000105538	0	0	0
F210A_HUMAN	Q96ND0	FAM210A C18orf19	FAM210A	3.78409e-05	0	0	0	0	0	0
F210B_HUMAN	Q96KR6	FAM210B C20orf108 PSEC0265	FAM210B	5.86533e-05	0	0	0	0	0	0
F234A_HUMAN	Q9H0X4	FAM234A C16orf9 ITFG3	FAM234A	3.43128e-05	6.30608e-05	7.37309e-05	2.69707e-05	0	0.000285571	0
FAM3C_HUMAN	Q92520	FAM3C ILEI GS3786	FAM3C	0.000211624	0	0.000478795	0.000582568	0	0	0
FA50A_HUMAN	Q14320	FAM50A DXS9928E HXC26 XAP5	FAM50A	0	0	0	0	3.76383e-05	0	0
FA76B_HUMAN	Q5HYJ3	FAM76B	FAM76B	0	0	0	8.29869e-05	3.86034e-05	0	0
F91A1_HUMAN	Q658Y4	FAM91A1	FAM91A1	3.11986e-05	0	0	0	0	0	0
FA98A_HUMAN	Q8NCA5	FAM98A	FAM98A	6.40928e-05	0.000206381	0	0	5.47467e-05	0	0
FA98B_HUMAN	Q52LJ0	FAM98B	FAM98B	7.65044e-05	0	0	0	4.90935e-05	0	0
FANCI_HUMAN	Q9NVI1	FANCI KIAA1794	FANCI	0	0	0	0	1.01043e-05	0	0
SEPR_HUMAN	Q12884	FAP	FAP	0.000394921	0.000487288	0	0.00163734	0	0	0
FACR1_HUMAN	Q8WVX9	FAR1 MLSTD2 UNQ2423/PRO4981	FAR1	0	0	7.49806e-05	2.74279e-05	2.55175e-05	0	0
FARP1_HUMAN	Q9Y4F1	FARP1 CDEP PLEKHC2	FARP1	3.94804e-05	0	3.49823e-05	0	0.000272008	0	0
FARP2_HUMAN	O94887	FARP2 KIAA0793 PLEKHC3	FARP2	0	0	0	0	5.01845e-05	0	0
SYFA_HUMAN	Q9Y285	FARSA FARS FARSL FARSLA	FARSA	9.12174e-05	0	0	0	6.48937e-05	7.02876e-05	0
SYFB_HUMAN	Q9NSD9	FARSB FARSLB FRSB HSPC173	FARSB	0.000159964	7.64374e-05	6.70281e-05	0	0.00010265	0.00015442	0
TNR6_HUMAN	P25445	FAS APT1 FAS1 TNFRSF6	FAS	0.000566022	0.000730178	0.000232834	0.000554736	5.9429e-05	0	0
FAS_HUMAN	P49327	FASN FAS	FASN	0.000166993	9.70166e-05	0.000164413	4.51127e-05	0.000193017	0.000545051	0.000223782
FAT1_HUMAN	Q14517	FAT1 CDHF7 FAT	FAT1	2.09698e-05	0	0	0	3.12413e-05	0	0
FAT2_HUMAN	Q9NYQ8	FAT2 CDHF8 KIAA0811 MEGF1	FAT2	3.67349e-06	0	0	0	0	0	0
RS30_HUMAN	P62861	FAU	FAU	0.000336005	0.000360348	0.000947969	0.000924711	0	0.00559465	0
FBRL_HUMAN	P22087	FBL FIB1 FLRN	FBL	0	0	0	0	4.42804e-05	0	0
FBLI1_HUMAN	Q8WUP2	FBLIM1 FBLP1	FBLIM1	5.72228e-05	0	0	0.000236816	0	0	0
FBLN1_HUMAN	P23142	FBLN1 PP213	FBLN1	0.000420754	0.000409486	0	0.000281066	0.000117314	0	0.00016467
FBLN2_HUMAN	P98095	FBLN2	FBLN2	0.000192499	0	0	0.000310374	0.000165964	0	0
FBN1_HUMAN	P35555	FBN1 FBN	FBN1	0.000199059	4.4466e-05	0	4.66801e-05	0	0	0
FBN2_HUMAN	P35556	FBN2	FBN2	1.87138e-05	0	0	1.54118e-05	0	0	0
FBXL3_HUMAN	Q9UKT7	FBXL3 FBL3A FBXL3A	FBXL3	2.39401e-05	0	0	0	0	0	0
FBX11_HUMAN	Q86XK2	FBXO11 FBX11 PRMT9 VIT1 UG063H01	FBXO11	0	0	0	0	2.17144e-05	0	0
FBX22_HUMAN	Q8NEZ5	FBXO22 FBX22	FBXO22	5.23987e-05	8.40811e-05	0	0	0.000100369	0	5.12305e-05
FBXW8_HUMAN	Q8N3Y1	FBXW8 FBW6 FBW8 FBX29 FBXO29 FBXW6	FBXW8	0	0	0	0	3.3706e-05	0	0
FCG2C_HUMAN	P31995	FCGR2C CD32 FCG2 IGFR2	FCGR2C	0	0	0	0	0	0	6.40381e-05
FCGRN_HUMAN	P55899	FCGRT FCRN	FCGRT	5.89485e-05	0	0	8.09122e-05	0	0.000214178	0
FCHO2_HUMAN	Q0JRZ9	FCHO2	FCHO2	5.29874e-05	4.25129e-05	0	4.74669e-05	0	0	0
FCRLA_HUMAN	Q7L513	FCRLA FCRL FCRL1 FCRLM1 FCRX FREB UNQ291/PRO329	FCRLA	0	0	0	0	0	0.000156795	0.00014778
FDFT_HUMAN	P37268	FDFT1	FDFT1	2.44389e-05	0	0.000273773	3.37134e-05	7.84132e-05	0	4.80286e-05
FPPS_HUMAN	P14324	FDPS FPS KIAA1293	FDPS	6.10972e-05	0	0.000138245	3.37134e-05	6.27306e-05	0	4.80286e-05
ADX_HUMAN	P10109	FDX1 ADX	FDX1	6.17404e-05	0	0	0	0	0	0
ADRO_HUMAN	P22570	FDXR ADXR	FDXR	0.000162926	0	0	0.000149837	2.78803e-05	0	0
HEMH_HUMAN	P22830	FECH	FECH	4.88778e-05	0	0	0	0	0	0
FEN1_HUMAN	P39748	FEN1 RAD2	FEN1	5.46985e-05	0	0.00015432	0	0.000245087	0.00014221	0.000107227
FERM2_HUMAN	Q96AC1	FERMT2 KIND2 MIG2 PLEKHC1	FERMT2	0.000162089	0.000161694	0	0.000414934	0.000135112	0	0.00014778
URP2_HUMAN	Q86UX7	FERMT3 KIND3 MIG2B URP2	FERMT3	0	0	0	0	0	0	3.03339e-05
FIBA_HUMAN	P02671	FGA	FGA	8.6654e-05	0.000146036	0	0.000355752	0	0	6.06677e-05
FIBB_HUMAN	P02675	FGB	FGB	6.31591e-05	0	0	0.000339473	0	0	6.17511e-05
FGF1_HUMAN	P05230	FGF1 FGFA	FGF1	0	0.000148378	0	0	0	0	0
FGF2_HUMAN	P09038	FGF2 FGFB	FGF2	0.000550978	0.000691635	0.000428115	0.00100833	0.00016998	0.000644837	0
FGFR1_HUMAN	P11362	FGFR1 BFGFR CEK FGFBR FLG FLT2 HBGFR	FGFR1	0	0	0	0	5.72757e-05	0	0
FGFR4_HUMAN	P22455	FGFR4 JTK2 TKF	FGFR4	0	5.7328e-05	0.000427304	1.83891e-05	4.27708e-05	0.000115815	0
FIBG_HUMAN	P02679	FGG PRO2061	FGG	6.78472e-05	0	0	0.000406208	0	0	4.43341e-05
FUMH_HUMAN	P07954	FH	FH	0.000208382	0	0.000254292	0.000617875	0.000150553	0.000111182	0
FHAD1_HUMAN	B1AJZ9	FHAD1 KIAA1937	FHAD1	0	0	0	0	0	3.7747e-05	0
FHL1_HUMAN	Q13642	FHL1 SLIM1	FHL1	9.77556e-05	7.00676e-05	0.000122885	0	4.18204e-05	0	0
FHL2_HUMAN	Q14192	FHL2 DRAL SLIM3	FHL2	0.000477757	0.00114298	0.000237852	0.00039046	0.000352859	0.000446204	0.00129677
FHL3_HUMAN	Q13643	FHL3 SLIM2	FHL3	0.000114094	0.000162738	0.000142705	5.22014e-05	0.000121414	0.000276359	0.000260284
FLIP1_HUMAN	Q7Z7B0	FILIP1 KIAA1275	FILIP1	0	0	0	0	1.09097e-05	0	0
FIL1L_HUMAN	Q4L180	FILIP1L COL4A3BPIP DOC1 GIP90	FILIP1L	1.80472e-05	0	0	0	2.31621e-05	0	0
FIP1_HUMAN	Q6UN15	FIP1L1 FIP1 RHE	FIP1L1	2.62627e-05	0	0.000198083	0	2.24707e-05	0	0
FIS1_HUMAN	Q9Y3D6	FIS1 TTC11 CGI-135	FIS1	0.000259633	0.000148378	0.000382665	0	0.000132841	0.000239805	0
FKB10_HUMAN	Q96AY3	FKBP10 FKBP65 PSEC0056	FKBP10	0.000789999	0.000236478	0.00052143	0.000757488	0.00029405	0.00102627	0.000126075
FKB11_HUMAN	Q9NYL4	FKBP11 FKBP19 UNQ336/PRO535	FKBP11	0.000266874	0	0	0	0	0	0
FKB14_HUMAN	Q9NWM8	FKBP14 FKBP22 UNQ322/PRO381	FKBP14	0.000195511	0	0.000184327	0	0	0	0
FKB15_HUMAN	Q5T1M5	FKBP15 KIAA0674	FKBP15	2.18856e-05	0	0	2.41529e-05	0	0	0
FKB1A_HUMAN	P62942	FKBP1A FKBP1 FKBP12	FKBP1A	0.000293267	0	0.000184327	0.000404561	0.000188192	0.000237976	0
FKBP2_HUMAN	P26885	FKBP2 FKBP13	FKBP2	0.000367321	0	0.000739962	0.000707982	0.000282288	0.000356963	0
FKBP3_HUMAN	Q00688	FKBP3 FKBP25	FKBP3	0.000176196	0	0.000265431	0.000453108	0.000662435	0.000179415	0.000507182
FKBP4_HUMAN	Q02790	FKBP4 FKBP52	FKBP4	0.000129884	0	8.50741e-05	0.000311201	0.000825148	0.000313591	0.000221671
FKBP5_HUMAN	Q13451	FKBP5 AIG6 FKBP51	FKBP5	0	0	0	0.000317303	0	0	0
FKBP7_HUMAN	Q9Y680	FKBP7 FKBP23 UNQ670/PRO1304	FKBP7	0.000180699	0	0.000250204	0	0	0	0
FKBP8_HUMAN	Q14318	FKBP8 FKBP38	FKBP8	0.00016964	5.60541e-05	9.83079e-05	7.19219e-05	5.01845e-05	0	0
FKBP9_HUMAN	O95302	FKBP9 FKBP60 FKBP63	FKBP9	0.000303326	0	0.000205482	0.000565101	0.000131435	0.000317301	9.14831e-05
FKRP_HUMAN	Q9H9S5	FKRP	FKRP	3.19927e-05	0	0	0	0	0	0
FILA_HUMAN	P20930	FLG	FLG	4.80972e-05	5.7987e-06	3.55942e-05	1.60161e-05	5.1915e-06	5.25187e-05	5.29971e-05
FILA2_HUMAN	Q5D862	FLG2 IFPS	FLG2	0.000207882	6.61121e-05	0.00012984	9.97679e-05	5.46363e-05	0.000191604	0.000227749
FLII_HUMAN	Q13045	FLII FLIL	FLII	7.91229e-05	0.00031313	0	0	0.000129787	0	5.56469e-05
FLNA_HUMAN	P21333	FLNA FLN FLN1	FLNA	0.000670558	0.000623876	0.00023658	0.000670522	0.000605428	0.000241569	0.000631722
FLNB_HUMAN	O75369	FLNB FLN1L FLN3 TABP TAP	FLNB	0.000483286	0.000254058	0.000113951	0.000641726	0.00029515	0.000107786	0.000194879
FLNC_HUMAN	Q14315	FLNC ABPL FLN2	FLNC	0.000639594	0.000524423	0.000458042	0.000682777	0.00188321	0.000466535	0.00177458
FLOT1_HUMAN	O75955	FLOT1	FLOT1	0.000386862	0.000295178	0	0.000206584	9.60979e-05	0.000130107	0
FLOT2_HUMAN	Q14254	FLOT2 ESA1 M17S1	FLOT2	0.000274799	0.000456185	0	0.000241015	9.60979e-05	0.000260214	0
FLRT2_HUMAN	O43155	FLRT2 KIAA0405 UNQ232/PRO265	FLRT2	6.37281e-05	0	2.98909e-05	0	3.05176e-05	0.000308725	0
FLRT3_HUMAN	Q9NZU0	FLRT3 KIAA1469 UNQ856/PRO1865	FLRT3	9.28034e-05	0	0.000121201	0	0.000175302	0	0
FWCH2_HUMAN	Q96CP2	FLYWCH2	FLYWCH2	0	0	0	0.000215766	0.000100369	0	0
FMC1_HUMAN	Q96HJ9	FMC1 C7orf55 HSPC268	FMC1	9.02359e-05	0	0	0	0	0	0
FMN1_HUMAN	Q68DA7	FMN1 FMN LD	FMN1	0	0	0	3.07261e-05	0	0	0
FMN2_HUMAN	Q9NZ56	FMN2	FMN2	9.77556e-06	0	0	0	0	0	0
FMNL2_HUMAN	Q96PY5	FMNL2 FHOD2 KIAA1902	FMNL2	9.53713e-06	0	0	0	2.44802e-05	0	0
FMNL3_HUMAN	Q8IVF7	FMNL3 FHOD3 FRL2 KIAA2014 WBP3	FMNL3	0	0	0	0	2.57356e-05	0	0
FMR1_HUMAN	Q06787	FMR1	FMR1	3.30441e-05	0	0.000280385	2.27922e-05	0.000657346	0.000258381	0.000405876
FINC_HUMAN	P02751	FN1 FN	FN1	0.00074099	0.000911145	0.000268352	0.000829438	0.00165151	0.000158173	0.00147702
FN3K_HUMAN	Q9H479	FN3K	FN3K	0	0	0	0	8.60305e-05	0	0
KT3K_HUMAN	Q9HA64	FN3KRP	FN3KRP	0.000138616	7.41892e-05	0.00019517	0.000109721	8.85608e-05	0.00025791	0.000237318
FNBP4_HUMAN	Q8N3X1	FNBP4 FBP30 KIAA1014	FNBP4	0	0	0.000100542	1.47113e-05	0	0	0
FND3A_HUMAN	Q9Y2H6	FNDC3A FNDC3 HUGO KIAA0970	FNDC3A	7.1095e-05	0	0	0	0	0	0
FND3B_HUMAN	Q53EP0	FNDC3B FAD104 NS5ABP37 UNQ2421/PRO4979/PRO34274	FNDC3B	7.28542e-05	0	0	8.51707e-05	0	0	0
FOCAD_HUMAN	Q5VW36	FOCAD KIAA1797	FOCAD	8.798e-06	0	0	0	0	0	0
FOLR1_HUMAN	P15328	FOLR1 FOLR	FOLR1	0	0.000294284	0	0	0	0	0
FOSL1_HUMAN	P15407	FOSL1 FRA1	FOSL1	0	8.69804e-05	0	0	0	0	0
FOXK1_HUMAN	P85037	FOXK1 MNF	FOXK1	3.91022e-05	3.36324e-05	0	6.47297e-05	5.01845e-05	0	0
FRMD8_HUMAN	Q9BZ67	FRMD8 FKSG44	FRMD8	2.30013e-05	0	0	0	0	0	0
FRY_HUMAN	Q5TBA9	FRY C13orf14	FRY	0	0	0	1.24618e-05	0	0	0
FSCN1_HUMAN	Q16658	FSCN1 FAN1 HSN SNL	FSCN1	0.0005345	0.000206381	0.000644599	0.000433135	0.00229936	0.00102321	0.00125748
FSIP2_HUMAN	Q5CZC0	FSIP2	FSIP2	1.50201e-06	0	0	0	0	7.31295e-06	0
FST_HUMAN	P19883	FST	FST	0	0	0.000232834	0	0	0	0
FSTL1_HUMAN	Q12841	FSTL1 FRP	FSTL1	0.000167918	0.000108104	0.000189594	0.000314646	6.45229e-05	0.000163183	0
FRIH_HUMAN	P02794	FTH1 FTH FTHL6 OK/SW-cl.84 PIG15	FTH1	0.000363654	0	0	0.00100177	0.000107538	0	0
FRIL_HUMAN	P02792	FTL	FTL	0.000674513	0	0	0.000323649	7.52767e-05	0.000142785	0
FTO_HUMAN	Q9C0B1	FTO KIAA1752	FTO	5.07668e-05	0.000108726	0	0	7.78724e-05	0	3.97478e-05
SPB1_HUMAN	Q8IY81	FTSJ3 SB92	FTSJ3	0	0	0	0	1.5521e-05	0	0
FUBP1_HUMAN	Q96AE4	FUBP1	FUBP1	0.000250703	0.000241115	0.00107915	0.000703663	0.000376383	0.000686695	0.000576343
FUBP3_HUMAN	Q96I24	FUBP3 FBP3	FUBP3	0.000251267	0.000244106	0.000913903	0.000168557	0.000230687	0.000368315	0.00042761
FUCO_HUMAN	P04066	FUCA1 Nbla10230	FUCA1	0	0	0	5.9935e-05	0	0	0
FUCO2_HUMAN	Q9BTY2	FUCA2 PSEC0151 UNQ227/PRO260	FUCA2	2.17235e-05	0	0	8.99024e-05	0	0	0
FUND2_HUMAN	Q9BWH2	FUNDC2 HCBP6 DC44 HCC3 PD03104	FUNDC2	0	0	0	0.000462355	0	0	0
FUS_HUMAN	P35637	FUS TLS	FUS	0.000716752	0.000809082	0.000775721	0.00020184	0.000468704	0.000388592	0.000434976
FUT8_HUMAN	Q9BYC5	FUT8	FUT8	1.75085e-05	0	0	0	0	0	0
FRDA_HUMAN	Q16595	FXN FRDA X25	FXN	0	0	9.61707e-05	0.000211075	0	0	0
FXR1_HUMAN	P51114	FXR1	FXR1	0.000134065	0.000198191	9.20008e-05	0.000138707	0.000301107	0.000232953	0.000312872
FXR2_HUMAN	P51116	FXR2 FMR1L2	FXR2	4.75568e-05	6.81739e-05	0	0	0.000274658	0	0.000109038
FXYD6_HUMAN	Q9H0Q3	FXYD6 UNQ521/PRO1056	FXYD6	0	0.000229312	0.0038206	0	0	0.000964133	0
FYCO1_HUMAN	Q9BQS8	FYCO1 ZFYVE7	FYCO1	4.56583e-05	0	0	0	0	0	0
FYN_HUMAN	P06241	FYN	FYN	0	0	0	0	0.000172766	0	0
FZD1_HUMAN	Q9UP38	FZD1	FZD1	0.000132842	0	0	0	0	0	0
FZD2_HUMAN	Q14332	FZD2	FZD2	0	5.91195e-05	0.000100626	0	0	0.000535445	0
FZD7_HUMAN	O75084	FZD7	FZD7	0.000110528	0	6.50451e-05	0	3.52859e-05	0.000758547	0
G3BP1_HUMAN	Q13283	G3BP1 G3BP	G3BP1	0.000254299	0.00029105	0.000203903	0.000102861	0.000752767	0.000235193	0.000221671
G3BP2_HUMAN	Q9UN86	G3BP2 KIAA0660	G3BP2	0.000163145	0.000116779	0.000139741	0	0.000181222	0.000226482	0.000192114
G6PD_HUMAN	P11413	G6PD	G6PD	0.000443086	0.000106883	0	0.00038399	2.55175e-05	6.90963e-05	0
LYAG_HUMAN	P10253	GAA	GAA	0.000100689	0	6.31979e-05	0.000107883	5.73537e-05	5.43944e-05	6.58678e-05
GBRL2_HUMAN	P60520	GABARAPL2 FLC3A GEF2	GABARAPL2	0.000167581	0	0.000766674	0.000577944	0	0	0
G45IP_HUMAN	Q8TAE8	GADD45GIP1 MRPL59 PLINP1 PRG6	GADD45GIP1	4.69227e-05	0	8.84771e-05	0.000129459	0	0	0
GALK1_HUMAN	P51570	GALK1 GALK	GALK1	0	0	0	0	5.37691e-05	0	0
GALNS_HUMAN	P34059	GALNS	GALNS	3.03379e-05	0	3.81367e-05	0.000251107	0	4.92363e-05	0
GALT1_HUMAN	Q10472	GALNT1	GALNT1	3.66583e-05	0	0	0.000126425	0	0	0
GLT15_HUMAN	Q8N3T1	GALNT15 GALNTL2 UNQ770/PRO1564	GALNT15	4.82082e-05	0	0	0	0	0	0
GALT2_HUMAN	Q10471	GALNT2	GALNT2	0.000234931	0	6.60519e-05	0.000323649	2.31621e-05	0	0
GALT5_HUMAN	Q7Z7M9	GALNT5	GALNT5	0.0001162	0	0	0	0	0	0
GALT7_HUMAN	Q86SF2	GALNT7	GALNT7	0	0	2.94924e-05	0.000237342	0	0	0
GAMT_HUMAN	Q14353	GAMT	GAMT	0	0	0	0	0.000144763	0	0
GANAB_HUMAN	Q14697	GANAB G2AN KIAA0088	GANAB	0.000752306	0.000129658	0.000500952	0.000572795	0.000555781	0.000514348	0.000269319
NEUM_HUMAN	P17677	GAP43	GAP43	0.000117307	0	0	0	0	0	0
G3P_HUMAN	P04406	GAPDH GAPD CDABP0047 OK/SW-cl.12	GAPDH	0.0045479	0.00252243	0.0036969	0.00466883	0.00353382	0.00551084	0.00300979
G3PT_HUMAN	O14556	GAPDHS GAPD2 GAPDH2 GAPDS HSD-35 HSD35	GAPDHS	0.000202553	0.000140135	0.000508798	0	0.000133825	0.000317075	0
GAPD1_HUMAN	Q14C86	GAPVD1 GAPEX5 KIAA1521 RAP6	GAPVD1	2.48832e-05	0	0	0	0	0	0
GARS_HUMAN	P41250	GARS1 GARS	GARS1	0.000315213	3.03908e-05	0.000142643	9.96406e-05	0.000326501	0.000265279	0.000138878
PUR2_HUMAN	P22102	GART PGFT PRGS	GART	0.000116982	3.50338e-05	2.9513e-05	7.49187e-05	0.000160311	0.000283103	8.53842e-05
GAS1_HUMAN	P54826	GAS1	GAS1	0	0.000175169	0.00121979	4.49512e-05	0.000480934	0.000555135	0.000288172
GAS2_HUMAN	O43903	GAS2	GAS2	0	0	0	0	0.000215076	0	0
GAS6_HUMAN	Q14393	GAS6 AXLLG	GAS6	5.47431e-05	0	5.52982e-05	0.000141596	0	0	0
P66A_HUMAN	Q86YP4	GATAD2A	GATAD2A	0	0	0	0	2.21402e-05	0	0
P66B_HUMAN	Q8WXI9	GATAD2B KIAA1150	GATAD2B	2.70708e-05	0	0	0	2.31621e-05	0	0
GAL3A_HUMAN	P0DPI2	GATD3A C21orf33	GATD3A	0.000125897	0	0	0	0.000241961	0	0.000247004
GAL3B_HUMAN	A0A0B4J2D5	GATD3B HES1 KNPI	GATD3B	0	0	0	0.000288972	0	0	0
GATM_HUMAN	P50440	GATM AGAT	GATM	0	0	0.000134168	0	0	0.000297258	0.000120072
GLCM_HUMAN	P04062	GBA GC GLUC	GBA	0.000107531	0	3.68655e-05	0.000242737	0	0	0
GLGB_HUMAN	Q04446	GBE1	GBE1	0.000183476	0	0	0	0	0	0
GBF1_HUMAN	Q92538	GBF1 KIAA0248	GBF1	4.85179e-05	0	0	0	1.09626e-05	7.91589e-05	1.67867e-05
GBP1_HUMAN	P32455	GBP1	GBP1	2.58765e-05	0	6.50567e-05	9.51908e-05	0	8.39914e-05	0
GBP5_HUMAN	Q96PP8	GBP5 UNQ2427/PRO4987	GBP5	2.62627e-05	0	0	0	0	0	0
VTDB_HUMAN	P02774	GC	GC	0	0	0	0	0	0	4.34976e-05
GCC1_HUMAN	Q96CN9	GCC1	GCC1	3.33258e-05	0	0	0	0	0	0
GCC2_HUMAN	Q8IWJ2	GCC2 KIAA0336 RANBP2L4	GCC2	5.68578e-05	0	2.12392e-05	0	0	0	0
GSH0_HUMAN	P48507	GCLM GLCLR	GCLM	0.000104348	0	0	0	0	0	0
GCN1_HUMAN	Q92616	GCN1 GCN1L1 KIAA0219	GCN1	0.000147607	0	1.50985e-05	0.000132552	1.5415e-05	2.78272e-05	1.18023e-05
GCSH_HUMAN	P23434	GCSH	GCSH	0	0	0	0.000425854	0	0	0
GDAP2_HUMAN	Q9NXN4	GDAP2	GDAP2	4.21061e-05	0	0	0	0	0	0
GDE1_HUMAN	Q9NZC3	GDE1 MIR16	GDE1	3.08702e-05	0	0	0	0	0	0
GDIA_HUMAN	P31150	GDI1 GDIL OPHN2 RABGDIA XAP4	GDI1	0.000305462	0	8.67422e-05	0.000349033	0.000191882	0.000227834	0.000180814
GDIB_HUMAN	P50395	GDI2 RABGDIB	GDI2	0.000513052	4.94595e-05	0.000316329	0.000729796	0.000472324	0.000367721	0.00027122
GEMI2_HUMAN	O14893	GEMIN2 SIP1	GEMIN2	0	0	0	0	4.70479e-05	0	0.000144086
GEMI4_HUMAN	P57678	GEMIN4	GEMIN4	9.77556e-06	0	0	0	0	0	0
GEMI5_HUMAN	Q8TEQ6	GEMIN5	GEMIN5	0	0	0	0	4.89967e-05	0	0
GET3_HUMAN	O43681	GET3 ARSA ASNA1 TRC40	GET3	0.000165432	0	0.000113432	4.14934e-05	0.00011581	0	0
GET4_HUMAN	Q7L5D6	GET4 C7orf20 CEE TRC35 CGI-20	GET4	3.17045e-05	0	0	0	0	0	0
GFAP_HUMAN	P14136	GFAP	GFAP	0.00477922	0	0.00114747	0.000647297	0	0.00114228	0
EFGM_HUMAN	Q96RP9	GFM1 EFG EFG1 GFM	GFM1	2.82667e-05	0	2.66497e-05	7.79877e-05	0	0	0
RRF2M_HUMAN	Q969S9	GFM2 EFG2 MSTP027	GFM2	4.71923e-05	0	0	0	0	0	0
GFPT1_HUMAN	Q06210	GFPT1 GFAT GFPT	GFPT1	0.000208035	3.19295e-05	0.000111996	8.19364e-05	9.52869e-05	0.000309621	0.000102137
GFPT2_HUMAN	O94808	GFPT2	GFPT2	0.000129609	0	0	0	0	0.000158832	0
GFRA1_HUMAN	P56159	GFRA1 GDNFRA RETL1 TRNR1	GFRA1	0	0.000197838	0.000216856	0	0.000103321	0.000279971	0
FCL_HUMAN	Q13630	GFUS SDR4E1 TSTA3	GFUS	6.51704e-05	0	0	8.99024e-05	4.18204e-05	0	0
GGA1_HUMAN	Q9UJY5	GGA1	GGA1	0	0	3.1599e-05	0	0	0	0
GGCT_HUMAN	O75223	GGCT C7orf24 CRF21	GGCT	0.000743241	0.000420405	0.00118955	0.000648521	0.000286768	0.00148575	0.0010978
VKGC_HUMAN	P38435	GGCX GC	GGCX	3.33258e-05	0	0	0	0	0	0
GGH_HUMAN	Q92820	GGH	GGH	0.000228916	0.000315304	0.000303588	0.000729161	0.000209102	0.00063446	0.000256153
GGT1_HUMAN	P19440	GGT1 GGT	GGT1	0.000212601	0	0.000290089	0	0	4.68149e-05	0
GGT5_HUMAN	P36269	GGT5 GGTLA1	GGT5	0.000318393	0.00018308	0	0.000194657	0	0	0
GGT7_HUMAN	Q9UJ14	GGT7 GGTL3 GGTL5	GGT7	2.51371e-05	0	6.31979e-05	0	0	8.15916e-05	0
GHITM_HUMAN	Q9H3K2	GHITM DERP2 MICS1 TMBIM5 My021 UNQ244/PRO281	GHITM	7.92613e-05	0	0.000119564	0.000262418	0	0	0
GID8_HUMAN	Q9NWU2	GID8 C20orf11 TWA1	GID8	0	0	0.000163846	0	0	0	0
GGYF2_HUMAN	Q6Y7W6	GIGYF2 KIAA0642 PERQ2 TNRC15	GIGYF2	2.74306e-05	1.68162e-05	0	0	1.50553e-05	0	3.07383e-05
SLD5_HUMAN	Q9BRT9	GINS4 SLD5	GINS4	0	0	0	0	5.79051e-05	0	0
GIPC1_HUMAN	O14908	GIPC1 C19orf3 GIPC RGS19IP1	GIPC1	8.1463e-05	0.000175169	0	0	6.27306e-05	0	0
GIPC3_HUMAN	Q8TF64	GIPC3 C19orf64	GIPC3	0	0.000148378	0	0	0	0	0
GIT1_HUMAN	Q9Y2X7	GIT1	GIT1	2.79302e-05	0	0	0	2.68845e-05	0	0
GIT2_HUMAN	Q14161	GIT2 KIAA0148	GIT2	3.4502e-05	0	0	0	0	0	0
CXA1_HUMAN	P17302	GJA1 GJAL	GJA1	9.54822e-05	0	0	9.82455e-05	0	0	0
CXA9_HUMAN	P57773	GJA9 GJA10	GJA9	1.98825e-05	0	0	0	0	0	0
GLPK_HUMAN	P32189	GK	GK	0.000221152	0	0	0.000265286	0	0	0
AGAL_HUMAN	P06280	GLA	GLA	5.98503e-05	0	0	6.60508e-05	0	0	0
BGAL_HUMAN	P16278	GLB1 ELNR1	GLB1	0.000108162	0	0	0.000149049	1.98097e-05	0	0
GSLG1_HUMAN	Q92896	GLG1 CFR1 ESL1 MG160	GLG1	0.000248238	0.000607252	0.000201908	0.000245546	0.00063567	0.000138954	0.000281768
GLI3_HUMAN	P10071	GLI3	GLI3	0	0	0	0	8.85608e-06	0	0
GLIP1_HUMAN	P48060	GLIPR1 GLIPR RTVP1	GLIPR1	9.77556e-05	0.000294284	0	0	0	0	0
GAPR1_HUMAN	Q9H4G4	GLIPR2 C9orf19 GAPR1	GLIPR2	0.000224784	0.000148378	0.000252551	0	0.000664206	0.000359707	0
LGUL_HUMAN	Q04760	GLO1	GLO1	0.000209757	0	0.00010533	0.000462355	0.000752767	0.000776752	0.000439119
GLOD4_HUMAN	Q9HC38	GLOD4 C17orf25 CGI-150 My027	GLOD4	5.02743e-05	0	6.31979e-05	0.000184942	0.000193569	0.000163183	0.000131736
GLRX1_HUMAN	P35754	GLRX GRX	GLRX	0.000612694	0.000315304	0.000693815	0.000709765	0	0.000339723	0
GLRX3_HUMAN	O76003	GLRX3 PICOT TXNL2 HUSSY-22	GLRX3	9.53528e-05	6.81739e-05	0.000179345	0.000218682	0.000305176	7.71812e-05	6.23074e-05
GLRX5_HUMAN	Q86SX6	GLRX5 C14orf87	GLRX5	0	0.000222568	0.00104091	0.000571145	0	0.000167983	0
GLSK_HUMAN	O94925	GLS GLS1 KIAA0838	GLS	0.000184798	0	0.000237934	0.000266013	0	0.000139612	0
GL8D1_HUMAN	Q68CQ7	GLT8D1 GALA4A AD-017 MSTP137 UNQ572/PRO1134	GLT8D1	2.79302e-05	0	0	0	0	0	0
GL8D2_HUMAN	Q9H1C3	GLT8D2 GALA4A UNQ1901/PRO4347	GLT8D2	2.93267e-05	0	0	0	0	0	0
GLTP_HUMAN	Q9NZD2	GLTP	GLTP	4.88778e-05	0	0	0	0	0	0
DHE3_HUMAN	P00367	GLUD1 GLUD	GLUD1	0.000447886	8.27027e-05	0.000623823	0.000207063	0.000382554	0.000334154	0.000188965
GLNA_HUMAN	P15104	GLUL GLNS	GLUL	4.18952e-05	0.000120116	5.26649e-05	3.85296e-05	0.000107538	0.000203979	8.23348e-05
SAP3_HUMAN	P17900	GM2A	GM2A	0.000251371	0	0.00010533	0.000462355	0	0	0.00016467
GMEB1_HUMAN	Q9Y692	GMEB1	GMEB1	0	0	0.00010533	0	5.97434e-05	0	0
GMEB2_HUMAN	Q9UKD1	GMEB2 KIAA1269	GMEB2	0	0	0	0	9.40959e-05	0	0
GMFB_HUMAN	P60983	GMFB	GMFB	0.000224784	0	0.000130113	0.000380763	0	0.000335965	0
GMPPA_HUMAN	Q96IJ6	GMPPA	GMPPA	6.37536e-05	0	0	0	0	0	0
GMPR2_HUMAN	Q9P2T1	GMPR2	GMPR2	3.08702e-05	0	0	0	7.92386e-05	0	0
GUAA_HUMAN	P49915	GMPS	GMPS	0.000118375	6.55177e-05	8.6179e-05	0.000105081	0.000175971	0.000211776	2.99399e-05
GNA11_HUMAN	P29992	GNA11 GA11	GNA11	0.000104949	0	0	0.000269707	7.16921e-05	0	0
GNA13_HUMAN	Q14344	GNA13	GNA13	0.000153768	0.00014332	0	0	0.000136867	0	0
GNAI1_HUMAN	P63096	GNAI1	GNAI1	0.000316295	0	0	0.000323649	0.000432841	0.000285571	0.000316989
GNAI2_HUMAN	P04899	GNAI2 GNAI2B	GNAI2	0.000588083	0.000536017	0.000260181	0.000612385	0.000432841	0.000331357	0
GNAI3_HUMAN	P08754	GNAI3	GNAI3	0.000380469	0.000430659	0.000215798	0.00053222	0.000495725	0.000457532	0.000309257
GNAQ_HUMAN	P50148	GNAQ GAQ	GNAQ	7.69485e-05	0	0	0.000385296	3.5846e-05	0	0
GNAS1_HUMAN	Q5JWF2	GNAS GNAS1	GNAS	0.000151075	0.00014771	0.000159418	0.000135046	0.000183105	0.000106544	0.000155768
GNAT2_HUMAN	P19087	GNAT2 GNATC	GNAT2	0.000235794	0	0	0	0	0	0
GBB1_HUMAN	P62873	GNB1	GNB1	0.000460912	0.000613565	0.000258438	0.000418492	0.000590006	0.000264543	0.00024923
GNB1L_HUMAN	Q9BYB4	GNB1L GY2 KIAA1645 WDR14 FKSG1	GNB1L	0	0	0	0	4.18204e-05	0	6.40381e-05
GBB2_HUMAN	P62879	GNB2	GNB2	0.000341781	0.000511304	0.000202183	0.000368079	0.000366211	0.000275589	0.000218076
GBB4_HUMAN	Q9HAV0	GNB4	GNB4	0.000240098	0.000265519	0.000174626	0.000425854	0.000217906	0.000375751	0
GBG12_HUMAN	Q9UBI6	GNG12	GNG12	0.000697984	0.000945912	0.000536671	0.00132017	0	0.00104503	0.000432257
GBG2_HUMAN	P59768	GNG2	GNG2	0	0	0	0.00020228	0	0.000713927	0
GBG5_HUMAN	P63218	GNG5 GNGT5	GNG5	0.000167581	0.000360348	0.00126396	0.000231178	0.000967843	0.000407958	0
GNL1_HUMAN	P36915	GNL1 HSR1	GNL1	1.7001e-05	0	0	0	0	0	0
NOG2_HUMAN	Q13823	GNL2 NGP1	GNL2	1.39651e-05	0	0	0	0	0	0
GNL3_HUMAN	Q9BVP2	GNL3 E2IG3 NS	GNL3	0	0	0	7.83021e-05	9.71312e-05	0	0
GNPI1_HUMAN	P46926	GNPDA1 GNPI HLN KIAA0060	GNPDA1	6.2387e-05	0	0.000201084	0	0.000159678	0.000105036	6.98598e-05
GNA1_HUMAN	Q96EK6	GNPNAT1 GNA1	GNPNAT1	0.000111721	0	0	0.000616474	0	0	0
GNS_HUMAN	P15586	GNS	GNS	0.000137411	0.000101711	0.000242368	0.000431352	0.000194262	0.000421048	0.000130142
GOGA1_HUMAN	Q92805	GOLGA1	GOLGA1	1.33303e-05	0	0	0	0	0	0
GOGA2_HUMAN	Q08379	GOLGA2	GOLGA2	8.05582e-05	3.34836e-05	0.000195746	6.88153e-05	0	0	0
GOGA3_HUMAN	Q08378	GOLGA3	GOLGA3	8.6225e-05	8.30741e-05	0	1.93802e-05	3.60607e-05	0	0
GOGA4_HUMAN	Q13439	GOLGA4	GOLGA4	3.14842e-05	0	0	1.86005e-05	0	0	0
GOGA5_HUMAN	Q8TBA6	GOLGA5 RETII RFG5 PIG31	GOLGA5	0.000134267	0	0.000159898	0.000136478	0	0	0
GOGA7_HUMAN	Q7Z5G4	GOLGA7 GCP16 HDCKB03P HSPC041	GOLGA7	0.000330847	0.000551782	0.000821318	0.000404561	0	0.00124937	0.000216129
GOG8C_HUMAN	A6NN73	GOLGA8CP GOLGA8C	GOLGA8CP	1.75085e-05	0	0	0	0	0	0
GOGB1_HUMAN	Q14789	GOLGB1	GOLGB1	6.86369e-05	2.01258e-05	1.17656e-05	0.000120508	0	7.59496e-06	0
GOLI4_HUMAN	O00461	GOLIM4 GIMPC GOLPH4 GPP130	GOLIM4	0.000110941	0	2.69747e-05	5.9204e-05	0	0	0
GOLM1_HUMAN	Q8NBJ4	GOLM1 C9orf155 GOLPH2 PSEC0242 UNQ686/PRO1326	GOLM1	7.18842e-05	0	0.00122885	0.000431532	6.69126e-05	0.000444221	0
GOLM2_HUMAN	Q6P4E1	GOLM2 CASC4 UNQ2573/PRO6308	GOLM2	0.000107731	0	0	0	0	0.000116559	0
GOLP3_HUMAN	Q9H4A6	GOLPH3 GPP34	GOLPH3	5.17529e-05	0.000222568	6.50567e-05	0.000285572	4.42804e-05	0	0
GLP3L_HUMAN	Q9H4A5	GOLPH3L GPP34R	GOLPH3L	0	0	0	0.000147113	0	0	0
GOT1B_HUMAN	Q9Y3E0	GOLT1B GCT2 GOT1A CGI-141 HDCMA39P UNQ432/PRO793	GOLT1B	0.00050951	0	0.000147462	0	0	0.00019038	0
GOPC_HUMAN	Q9HD26	GOPC CAL FIG	GOPC	2.30013e-05	0	0	0	0	0	0
GORAB_HUMAN	Q5T7V8	GORAB NTKLBP1 SCYL1BP1	GORAB	0	0	0	0	5.01845e-05	0	0
GORS2_HUMAN	Q9H8Y8	GORASP2 GOLPH6	GORASP2	0.000156181	5.36688e-05	4.70623e-05	6.88614e-05	4.8049e-05	0.000121519	0
GOSR1_HUMAN	O95249	GOSR1 GS28	GOSR1	4.04506e-05	0	0.000305093	5.58015e-05	0	0	0
GOSR2_HUMAN	O14653	GOSR2 GS27	GOSR2	0.000117307	0.000302692	0.000353908	0.000129459	0	0	0
AATC_HUMAN	P17174	GOT1	GOT1	9.58229e-05	0	0.000192341	0.000281434	0.000163645	0.000350217	0
AATM_HUMAN	P00505	GOT2 KYAT4	GOT2	0.000710696	0.000236478	0.00124544	0.00163085	0.000470479	0.00129572	0.000360215
GPAT4_HUMAN	Q86UL3	GPAT4 AGPAT6 TSARG7 UNQ551/PRO1108	GPAT4	2.2559e-05	0	0	0	0	0	0
GPC1_HUMAN	P35052	GPC1	GPC1	0.00030879	0.0020749	0.00207328	0.000866972	0.00111701	0.00093397	0.000241692
GPC2_HUMAN	Q8N158	GPC2	GPC2	0	0	0	0	0.000143384	0	0
GPC3_HUMAN	P51654	GPC3 OCI5	GPC3	0	0	0	0	0.000798389	0	0
GPC4_HUMAN	O75487	GPC4 UNQ474/PRO937	GPC4	0.000285235	0.000122053	0.000443848	2.61007e-05	0.000412808	0.000131506	5.57752e-05
GPC5_HUMAN	P78333	GPC5	GPC5	0	0	9.75677e-05	0	0	0	0
GPC6_HUMAN	Q9Y625	GPC6 UNQ369/PRO705	GPC6	0.00015902	0.000260251	0.000226144	0.000301754	0.000119487	0.000110038	7.31865e-05
GPD1L_HUMAN	Q8N335	GPD1L KIAA0089	GPD1L	3.08702e-05	0	0	0	0	0	0
GPDM_HUMAN	P43304	GPD2	GPD2	0.000283024	0.000404835	0.000377437	0.00059935	0	0.00144548	2.84614e-05
GEPH_HUMAN	Q9NQX3	GPHN GPH KIAA1385	GPHN	0	0	0.000110596	0	3.76383e-05	5.09585e-05	8.64515e-05
G6PI_HUMAN	P06744	GPI	GPI	0.000517973	0.00030029	0.000470828	0.000466956	0.000322614	0.000443274	0.000237856
GPKOW_HUMAN	Q92917	GPKOW GPATC5 GPATCH5 T54	GPKOW	0	0	8.50741e-05	3.11201e-05	0	0	0
GPNMB_HUMAN	Q14956	GPNMB HGFIN NMB UNQ1725/PRO9925	GPNMB	0	0	9.75677e-05	0	0	0	0
GP107_HUMAN	Q5VW38	GPR107 KIAA1624 LUSTR1	GPR107	1.75085e-05	0	0	0	0	0	0
GP108_HUMAN	Q9NPR9	GPR108 LUSTR2	GPR108	0	4.13514e-05	0	5.30572e-05	0	0	0
GP176_HUMAN	Q14439	GPR176	GPR176	0	4.42532e-05	0	0	0	0	0
RAI3_HUMAN	Q8NFJ5	GPRC5A GPCR5A RAI3 RAIG1	GPRC5A	0.000102643	0	0	0.000160123	0	0	0
GRIN1_HUMAN	Q7Z2K8	GPRIN1 KIAA1893	GPRIN1	0	0	0	0	1.47601e-05	0	0
CSN1_HUMAN	Q13098	GPS1 COPS1 CSN1	GPS1	9.96593e-05	4.50434e-05	0	0.000115589	0.00012098	7.27979e-05	4.11674e-05
GPS2_HUMAN	Q13227	GPS2	GPS2	0	0	0.000225021	0	0	0	0
GPSM1_HUMAN	Q86YR5	GPSM1 AGS3	GPSM1	1.56409e-05	0	0	0	0	0	0
GPX1_HUMAN	P07203	GPX1	GPX1	0.000468305	0.000458624	0.000144882	0.000514896	0	0.000519219	0
GPX4_HUMAN	P36969	GPX4	GPX4	0.00022742	0.000343968	0.000345966	7.35565e-05	0.000239517	0.000417164	0.000523948
GPX7_HUMAN	Q96SL4	GPX7 GPX6 UNQ469/PRO828	GPX7	0	0	0	0.000154118	0.000107538	0	0
GPX8_HUMAN	Q8TED1	GPX8 UNQ847/PRO1785	GPX8	0.000379787	0.000315304	9.21636e-05	0.00020228	0	0	0
GRM2B_HUMAN	Q96HH9	GRAMD2B GRAMD3 NS3TP2	GRAMD2B	0	5.25507e-05	0	0	0	0	0
GRB2_HUMAN	P62993	GRB2 ASH	GRB2	0.000353219	0.000554935	0.000387708	0.000194189	0.000240885	0.000758628	0.00055329
GREM1_HUMAN	O60565	GREM1 CKTSF1B1 DAND2 DRM PIG2	GREM1	5.58603e-05	0	0	0	0	0	0
GRHPR_HUMAN	Q9UBQ7	GRHPR GLXR MSTP035	GRHPR	0.000155026	0	0	0	8.36408e-05	0	0
NMDZ1_HUMAN	Q05586	GRIN1 NMDAR1	GRIN1	1.11721e-05	0	0	0	0	0	0
NMDE3_HUMAN	Q14957	GRIN2C NMDAR2C	GRIN2C	8.75423e-06	0	0	0	0	0	0
GRIP2_HUMAN	Q9C0E4	GRIP2 KIAA1719	GRIP2	0	0	0	0	0	0	2.04015e-05
GRAP1_HUMAN	Q4V328	GRIPAP1 KIAA1167	GRIPAP1	0	0	0	0	0	0	3.60215e-05
GRN_HUMAN	P28799	GRN	GRN	0	0	6.91227e-05	2.52851e-05	0	0.000178482	3.60215e-05
GRPE1_HUMAN	Q9HAV7	GRPEL1 GREPEL1	GRPEL1	0.000245004	0.000157652	0.000406581	0.00161824	0.000188192	0.000475951	0.000144086
GRSF1_HUMAN	Q12849	GRSF1	GRSF1	7.74667e-05	7.13896e-05	0.000121511	0.000131453	8.52189e-05	0.000115378	4.34976e-05
GRWD1_HUMAN	Q9BQ67	GRWD1 GRWD KIAA1942 WDR28	GRWD1	2.39401e-05	7.72173e-05	0	0	4.60878e-05	0	0
GSDMA_HUMAN	Q96QA5	GSDMA GSDM GSDM1 FKSG9	GSDMA	0.00115491	7.72173e-05	0.000107528	0.000188944	0	0.000233119	0.000399912
GSDME_HUMAN	O60443	GSDME DFNA5 ICERE1	GSDME	3.19927e-05	0	0	0.000235381	0	0	0
GSK3A_HUMAN	P49840	GSK3A	GSK3A	2.30013e-05	0	0	0	2.95203e-05	0	0
GSK3B_HUMAN	P49841	GSK3B	GSK3B	2.49589e-05	0	0	0	3.20326e-05	0	0
GELS_HUMAN	P06396	GSN	GSN	0.000225408	0.000703935	0.000316913	8.3884e-05	0.000744014	0.000208681	0.000388697
ERF3A_HUMAN	P15170	GSPT1 ERF3A	GSPT1	9.97647e-05	6.75652e-05	0	0	0.000147865	0.000181995	0.000144086
ERF3B_HUMAN	Q8IYD1	GSPT2 ERF3B	GSPT2	4.25024e-05	0	0	0	0	0	0
GSHR_HUMAN	P00390	GSR GLUR GRD1	GSR	0.000189161	0.000225217	0.000268336	0.000268897	0.000282288	0.00130028	0.000226421
GSHB_HUMAN	P48637	GSS	GSS	0.000113079	0	0.000166384	0.000373441	0.000304002	0.000251009	0.000199503
GSTK1_HUMAN	Q9Y2Q3	GSTK1 HDCMD47P	GSTK1	0.00035192	0.000100897	0.000176954	0	0	0	0
GSTM2_HUMAN	P28161	GSTM2 GST4	GSTM2	0.000112795	0	0	0	0	0	0
GSTM3_HUMAN	P21266	GSTM3 GST5	GSTM3	0.000152392	0	0	0.000299675	0	0.000105767	0
GSTO1_HUMAN	P78417	GSTO1 GSTTLP28	GSTO1	0.000262161	0.000225217	0.000113836	0.000479999	0.000188192	0.000145596	0.000123502
GSTP1_HUMAN	P09211	GSTP1 FAEES3 GST3	GSTP1	0.00124157	0.000493519	0.000687242	0.0011276	0.00098187	0.000655902	0.000601402
T2EB_HUMAN	P29084	GTF2E2 TF2E2	GTF2E2	0	0	0	0	6.84334e-05	0	0
T2FA_HUMAN	P35269	GTF2F1 RAP74	GTF2F1	6.06759e-05	0	7.62733e-05	2.79008e-05	6.48937e-05	0	0
T2FB_HUMAN	P13984	GTF2F2 RAP30	GTF2F2	8.37905e-05	0	0	0	8.06536e-05	0	0
TF2H3_HUMAN	Q13889	GTF2H3	GTF2H3	0	0	0	0	4.42804e-05	0	0
GTF2I_HUMAN	P78347	GTF2I BAP135 WBSCR6	GTF2I	6.31327e-05	0.000405391	0.000348498	0.00010114	0.00100817	0.000582383	0.000761597
TF3C1_HUMAN	Q12789	GTF3C1	GTF3C1	0	0	0	0	0.000166932	0	6.75214e-05
TF3C2_HUMAN	Q8WUA4	GTF3C2 KIAA0011	GTF3C2	0	0	0	0	8.19845e-05	0	0
TF3C3_HUMAN	Q9Y5Q9	GTF3C3	GTF3C3	0	0	0	0	0.00011925	6.05448e-05	3.42382e-05
TF3C4_HUMAN	Q9UKN8	GTF3C4	GTF3C4	0	0	7.21281e-05	0	0.000106369	0	0
TF3C5_HUMAN	Q9Y5Q8	GTF3C5 CDABP0017	GTF3C5	0	0	0	0	0.000238376	0	7.68458e-05
GTPB1_HUMAN	O00178	GTPBP1	GTPBP1	0	0	0	0	4.18204e-05	0	0
NOG1_HUMAN	Q9BZE4	GTPBP4 CRFG NOG1	GTPBP4	1.58523e-05	0	0	0	5.08626e-05	0	0
GTPB6_HUMAN	O43824	GTPBP6 PGPL	GTPBP6	0	0	0	0	5.28257e-05	0	0
GTSE1_HUMAN	Q9NYZ3	GTSE1	GTSE1	0	0	0	0	1.95524e-05	0	0
KGUA_HUMAN	Q16774	GUK1 GMK GMPK	GUK1	0	0	0	0.000147113	0	0	0
BGLR_HUMAN	P08236	GUSB	GUSB	0	0	2.94924e-05	4.31532e-05	3.01107e-05	0	0
GXLT1_HUMAN	Q4G148	GXYLT1 GLT8D3	GXYLT1	2.30013e-05	0	0	0	0	0	0
GLPC_HUMAN	P04921	GYPC GLPC GPC	GYPC	8.37905e-05	0.000270261	0.00110596	0.000346767	0	0.00244775	0
GYS1_HUMAN	P13807	GYS1 GYS	GYS1	6.98254e-05	0	0	3.85296e-05	0.0001165	0	2.74449e-05
H10_HUMAN	P07305	H1-0 H1F0 H1FV	H1-0	5.58603e-05	0	0	0	7.16921e-05	0	0
H11_HUMAN	Q02539	H1-1 H1F1 HIST1H1A	H1-1	0.000399909	0	0	0	0	0	0
H1X_HUMAN	Q92522	H1-10 H1FX	H1-10	5.33212e-05	0	0	0	0.000171083	0	0.00010479
H12_HUMAN	P16403	H1-2 H1F2 HIST1H1C	H1-2	0.00103651	0.00138133	0.00180289	0.000693533	0.000716921	0.00105809	0.00115269
H13_HUMAN	P16402	H1-3 H1F3 HIST1H1D	H1-3	0.00100286	0.00131854	0.00201084	0.000662009	0	0.00025961	0.000995502
H14_HUMAN	P10412	H1-4 H1F4 HIST1H1E	H1-4	0.000936073	0.00131854	0.00172094	0.000662009	0.000581684	0.00101	0.000943107
H15_HUMAN	P16401	H1-5 H1F5 HIST1H1B	H1-5	0.000523935	0.000712861	0.000961707	0.000633226	0.00032729	0.000124161	0.000350818
H2A1A_HUMAN	Q96QV6	H2AC1 H2AFR HIST1H2AA	H2AC1	0.00134739	0	0	0	0	0	0
H2A1H_HUMAN	Q96KK5	H2AC12 HIST1H2AH HIST1H2AI	H2AC12	0.00176845	0	0	0	0	0	0
H2A2A_HUMAN	Q6FI13	H2AC18 H2AFO HIST2H2AA HIST2H2AA3; H2AC19 HIST2H2AA4	H2AC18; H2AC19	0	0.000720695	0.00163542	0	0	0	0
H2A2C_HUMAN	Q16777	H2AC20 H2AFQ HIST2H2AC	H2AC20	0	0	0.000947969	0.000346767	0	0.00163183	0
H2A1B_HUMAN	P04908	H2AC4 H2AFM HIST1H2AB; H2AC8 H2AFA HIST1H2AE	H2AC4; H2AC8	0	0	0	0	0.000483922	0	0
H2A1D_HUMAN	P20671	H2AC7 H2AFG HIST1H2AD	H2AC7	0	0	0	0	0.00059146	0	0
H2AV_HUMAN	Q71UI9	H2AZ2 H2AFV H2AV	H2AZ2	0.000125686	0	0	0	0.000268845	0	0
H2B1K_HUMAN	O60814	H2BC12 H2BFT HIRIP1 HIST1H2BK	H2BC12	0	0	0.000947969	0.000577944	0	0.00224377	0
H2B1C_HUMAN	P62807	H2BC4 H2BFL HIST1H2BC; H2BC6 H2BFH HIST1H2BE; H2BC7 H2BFG HIST1H2BF; H2BC8 H2BFA HIST1H2BG; H2BC10 H2BFK HIST1H2BI	H2BC4; H2BC6; H2BC7; H2BC8; H2BC10	0	0	0	0	0.000860305	0	0.000658678
H2B1H_HUMAN	Q93079	H2BC9 H2BFJ HIST1H2BH	H2BC9	0.000418952	0	0.00252747	0	0	0.00174715	0
H31T_HUMAN	Q16695	H3-4 H3FT HIST3H3	H3-4	0.000294189	0.00039413	0.000552982	0.000303421	0.00023524	0.000955789	0.000216129
H4_HUMAN	P62805	H4C1 H4/A H4FA HIST1H4A; H4C2 H4/I H4FI HIST1H4B; H4C3 H4/G H4FG HIST1H4C; H4C4 H4/B H4FB HIST1H4D; H4C5 H4/J H4FJ HIST1H4E; H4C6 H4/C H4FC HIST1H4F; H4C8 H4/H H4FH HIST1H4H; H4C9 H4/M H4FM HIST1H4I; H4C11 H4/E H4FE HIST1H4J; H4C12 H4/D H4FD HIST1H4K; H4C13 H4/K H4FK HIST1H4L; H4C14 H4/N H4F2 H4FN HIST2H4 HIST2H4A; H4C15 H4/O H4FO HIST2H4B; H4-16 HIST4H4	H4C1; H4C2; H4C3; H4C4; H4C5; H4C6; H4C8; H4C9; H4C11; H4C12; H4C13; H4C14; H4C15; H4-16	0.00144584	0.000687936	0.00215855	0.00103987	0.0006159	0.00215026	0.00146706
G6PE_HUMAN	O95479	H6PD GDH	H6PD	0.000115462	0	0	0.000272738	0	0	0
HABP4_HUMAN	Q5JVS0	HABP4	HABP4	0	8.22532e-05	0	0	0	0	0
HACD3_HUMAN	Q9P035	HACD3 BIND1 PTPLAD1	HACD3	0.000129789	0	0.000308641	0	0.000105037	0	0
HACL1_HUMAN	Q9UJ83	HACL1 HPCL HPCL2 PHYH2 HSPC279	HACL1	0	0	0.000207368	0	0	4.46204e-05	0
HCDH_HUMAN	Q16836	HADH HAD HAD1 HADHSC SCHAD	HADH	0.000121017	0	0.000130113	0.000190382	0.000110701	0.000119902	0
ECHA_HUMAN	P40939	HADHA HADH	HADHA	0.00101009	0.00179305	0.00235902	0.00115988	0.00245783	0.00177361	0.00147211
ECHB_HUMAN	P55084	HADHB MSTP029	HADHB	0.000807708	0.00121176	0.00207651	0.000989665	0.00123985	0.00125126	0.000655449
GLO2_HUMAN	Q16775	HAGH GLO2 HAGH1	HAGH	3.4502e-05	0	0	9.51908e-05	6.64206e-05	0	0
HUTH_HUMAN	P42357	HAL HIS	HAL	0.000258404	0	3.03004e-05	4.43354e-05	0	3.91193e-05	0.000157902
HARS1_HUMAN	P12081	HARS1 HARS HRS	HARS1	0.000159755	0	0.000194029	0.000170341	2.64129e-05	0.000107281	4.04451e-05
SYHM_HUMAN	P49590	HARS2 HARSL HARSR HO3	HARS2	6.17404e-05	0	0.000116417	5.67805e-05	0	0	0
HAT1_HUMAN	O14929	HAT1 KAT1	HAT1	4.71588e-05	0	4.42385e-05	6.47297e-05	0	0.0001223	4.61075e-05
HBA_HUMAN	P69905	HBA1; HBA2	HBA1; HBA2	0.00133439	0.0017657	0.0021034	0.00248248	0.000752767	0.0029778	0.00230537
HBB_HUMAN	P68871	HBB	HBB	0.00115935	0.00102474	0.00135391	0.0016321	0.000376383	0.00249874	0.0020172
HBD_HUMAN	P02042	HBD	HBD	0	0	0.000829473	0.000707982	0	0.00142785	0.000792472
HBEGF_HUMAN	Q99075	HBEGF DTR DTS HEGFL	HBEGF	0	0.000219342	0.000288512	0	0	0	0
CCHL_HUMAN	P53701	HCCS CCHL	HCCS	0	8.13688e-05	0.000214057	0.000208806	0	0.000131506	0
HCFC1_HUMAN	P51610	HCFC1 HCF1 HFC1	HCFC1	4.20957e-05	2.41381e-05	0.000169334	0.000116142	0.000100849	5.8517e-05	4.4122e-05
HDAC1_HUMAN	Q13547	HDAC1 RPD3L1	HDAC1	5.33212e-05	0	0	0	0	0	0
HDAC2_HUMAN	Q92769	HDAC2	HDAC2	4.28716e-05	6.87936e-05	0.000117092	8.82678e-05	0.000301107	8.15521e-05	0.000125748
HDAC3_HUMAN	O15379	HDAC3	HDAC3	0	0	0	0	6.14504e-05	0	0
HDAC6_HUMAN	Q9UBN7	HDAC6 KIAA0901 JM21	HDAC6	0	0	0	0	1.72389e-05	0	0
HDDC2_HUMAN	Q7Z4H3	HDDC2 C6orf74 NS5ATP2 CGI-130	HDDC2	0	0	0	0	6.5458e-05	0	0
HDGF_HUMAN	P51858	HDGF HMG1L2	HDGF	0.000282405	0.000186847	0.000491539	0.00191792	0.000529725	0.000287028	0.000426921
HDGR2_HUMAN	Q7Z4V5	HDGFL2 HDGF2 HDGFRP2 HRP2 UNQ785/PRO1604	HDGFL2	8.73868e-05	0.000170435	0.000627709	0.00024055	0.000101725	0	9.34611e-05
HDGR3_HUMAN	Q9Y3E1	HDGFL3 HDGF2 HDGFRP3 CGI-142	HDGFL3	0	0	0.000192341	0	0	0	0
HDHD2_HUMAN	Q9H0R4	HDHD2	HDHD2	0	0	0	0.000167405	0.00010383	9.84726e-05	0
HDHD3_HUMAN	Q9BSH5	HDHD3 C9orf158	HDHD3	0	0	0	0.000173383	0	0	0
HDHD5_HUMAN	Q9BXW7	HDHD5 CECR5	HDHD5	6.37536e-05	0	0	0	0	0	0
VIGLN_HUMAN	Q00341	HDLBP HBP VGL	HDLBP	0.000370788	0.000268344	0.000105185	0.000210088	0.000144147	0.000216845	8.99259e-05
HEAT3_HUMAN	Q7Z4Q2	HEATR3	HEATR3	0	0	0	4.31532e-05	0	0	0
HEBP1_HUMAN	Q9NRV9	HEBP1 HBP	HEBP1	0.000111721	0	0.00010533	0	0	0.000135986	0
HEBP2_HUMAN	Q9Y5Z4	HEBP2 C6orf34 SOUL	HEBP2	5.10029e-05	0	0	0	0	0	0
HECD1_HUMAN	Q9ULT8	HECTD1 KIAA1131	HECTD1	1.21772e-05	0	0	0	5.20946e-06	0	0
HECD3_HUMAN	Q5T447	HECTD3	HECTD3	2.41869e-05	0	0	0	0	0	0
HEG1_HUMAN	Q9ULI3	HEG1 KIAA1237	HEG1	2.80506e-05	0	1.50471e-05	5.7477e-05	0	0.000174839	0
HELZ_HUMAN	P42694	HELZ DRHC KIAA0054	HELZ	0	1.1518e-05	0	0	0	0	0
HEPH_HUMAN	Q9BQS7	HEPH KIAA0698 UNQ2562/PRO6242	HEPH	5.66472e-05	0	0	0	0	0	0
HERC4_HUMAN	Q5GLZ8	HERC4 KIAA1593	HERC4	4.43597e-05	0	0	0	0	0	0
HERP1_HUMAN	Q15011	HERPUD1 HERP KIAA0025 MIF1	HERPUD1	0	0	0	7.35565e-05	0	0	0
HEXA_HUMAN	P06865	HEXA	HEXA	6.25962e-05	0	0	0.000265286	0	0	0
HEXB_HUMAN	P07686	HEXB HCC7	HEXB	0.000163113	0	0	0.000410983	0	0	0
HEXI1_HUMAN	O94992	HEXIM1 CLP1 EDG1 HIS1 MAQ1	HEXIM1	4.29171e-05	0.000153807	0.000107899	3.94694e-05	0	0	0
HFE_HUMAN	Q30201	HFE HLAH	HFE	0	9.45912e-05	0	0	0	0.000214178	0
HGF_HUMAN	P14210	HGF HPTA	HGF	0	0	0	0	0.000643933	0	0
HGFA_HUMAN	Q04756	HGFAC	HGFAC	0	3.55272e-05	0	0	0	0	0
HGS_HUMAN	O14964	HGS HRS	HGS	0.000109122	0	7.71602e-05	0.000112901	6.12717e-05	0	2.68067e-05
3HIDH_HUMAN	P31937	HIBADH	HIBADH	0.000301646	0	0.000122668	0.000554826	6.45229e-05	0	0
HIBCH_HUMAN	Q6NVY1	HIBCH	HIBCH	0.000122763	0	5.14402e-05	0.000489236	0.00014005	0	5.36133e-05
HIF1N_HUMAN	Q9NWT6	HIF1AN FIH1	HIF1AN	0	6.30608e-05	5.52982e-05	0	0	0	0
HIG1A_HUMAN	Q9Y241	HIGD1A HIG1 HSPC010	HIGD1A	0.000117307	0	0	0	0	0	0
HINT1_HUMAN	P49773	HINT1 HINT PKCI1 PRKCNH1	HINT1	0.000167581	0	0	0	0.000107538	0	0
HINT2_HUMAN	Q9BX68	HINT2	HINT2	0.000103506	0	0	0	8.85608e-05	0	0
HIP1_HUMAN	O00291	HIP1	HIP1	3.04143e-05	3.26177e-05	1.90683e-05	3.21597e-05	3.24468e-05	0	3.97478e-05
HXK1_HUMAN	P19367	HK1	HK1	0.000440768	2.47297e-05	0.00010395	0.000285572	5.90405e-05	3.99675e-05	0
HXK2_HUMAN	P52789	HK2	HK2	0.000138239	0	0	0	1.47601e-05	3.99675e-05	0
HKDC1_HUMAN	Q2TB90	HKDC1	HKDC1	4.5642e-05	0	0	4.71333e-05	0	3.95794e-05	0
	P30443	HLA-A HLAA	HLA-A	0	0	0	0.000907795	0	0.00794026	0
	P30459	HLA-B HLAB	HLA-A	0	0	0	0.00134196	0	0.00410943	0
1A01_HUMAN	P04439	HLA-A HLAA	HLA-A	0	0.00166111	0.00218298	0.00206076	0	0	0
HLAA_HUMAN	P04439	HLA-A HLAA	HLA-A	0.00189013	0.00113817	0	0.00154557	0	0	0
	P18463		HLA-B	0	0	0	0.000809122	0	0.0048547	0
	P30462	HLA-F HLA-5.4 HLAF	HLA-B	0	0	0	0.000768666	0	0.0039266	0
1B27_HUMAN	P01889	HLA-B HLAB	HLA-B	0	0	0	0.00184824	0	0	0
HLAB_HUMAN	P01889	HLA-B HLAB	HLA-B	0.00215162	0.00150731	0.00111687	0	0	0	0
	Q29963		HLA-C	0	0	0	0.000868326	0	0.00640793	0
	Q9TNN7	HLA-C HLAC	HLA-C	0	0	0	0	0	0.00403978	0
	P30499		HLA-C	0	0	0	0.000710448	0	0.00383083	0
HLAC_HUMAN	P10321	HLA-C HLAC	HLA-C	0.00152403	0.00129198	0	0.00180317	0	0	0
DRA_HUMAN	P01903	HLA-DRA HLA-DRA1	HLA-DRA	0.000528504	0	0	0	0	0	0
DRB1_HUMAN	P01911	HLA-DRB1	HLA-DRB1	0.000235794	0	0	0	0	0	0
HLAE_HUMAN	P13747	HLA-E HLA-6.2 HLAE	HLA-E	0	0	0	0.000283193	0	0.00157064	0
HLAF_HUMAN	P30511	HLA-F HLA-5.4 HLAF	HLA-F	0.00039299	0	0	0	0	0	0
HLTF_HUMAN	Q14527	HLTF HIP116A RNF80 SMARCA3 SNF2L3 ZBU1	HLTF	0	0	0	0	1.32064e-05	0	0
HM13_HUMAN	Q8TCT9	HM13 H13 IMP1 PSL3 SPP MSTP086	HM13	0.000400559	0	0.000701343	0.00173665	0	6.96514e-05	0
HMBX1_HUMAN	Q6NT76	HMBOX1 HOT1 TAH1	HMBOX1	0	0	0	0	8.00816e-05	0	0
HEM3_HUMAN	P08397	HMBS PBGD UPS	HMBS	0	0	0	0.00012448	0	0	0
HM20A_HUMAN	Q9NP66	HMG20A HMGX1 HMGXB1	HMG20A	0	0	0	0	0.000112915	0	0
HMGA1_HUMAN	P17096	HMGA1 HMGIY	HMGA1	0.000808451	0.00126122	0.00104072	0.00149263	0.000125461	0.000713927	0
HMGA2_HUMAN	P52926	HMGA2 HMGIC	HMGA2	0.0008798	0.000420405	0.000520361	0	0.000564575	0	0
HMGB1_HUMAN	P09429	HMGB1 HMG1	HMGB1	0.000387702	0.000353141	0.00065053	0.00122987	0.00207764	0.00179374	0.00202873
HMGB2_HUMAN	P26583	HMGB2 HMG2	HMGB2	0.000244389	0	0.000460818	0.000337134	0.000972324	0.000764378	0.00129677
HMGB3_HUMAN	O15347	HMGB3 HMG2A HMG4	HMGB3	7.65044e-05	0	0.000288512	0.000562867	0.000490935	0.000531741	0.000300701
HMGCL_HUMAN	P35914	HMGCL	HMGCL	0.000138268	0.000185473	6.50567e-05	0.00061874	0	0	0
HMCS1_HUMAN	Q01581	HMGCS1 HMGCS	HMGCS1	0	0	0.000155223	0	0.000145271	0	0
HMGN1_HUMAN	P05114	HMGN1 HMG14	HMGN1	0.000213285	0.000343968	0.000887086	0.000588452	0	0.000519219	0
HMGN2_HUMAN	P05204	HMGN2 HMG17	HMGN2	0.000260682	0.000700676	0.00179978	0.00107883	0.000334563	0.0019038	0.00102461
HMGN3_HUMAN	Q15651	HMGN3 TRIP7 PNAS-24	HMGN3	0	0.000343968	0.000981697	0.000588452	0	0.000778829	0.000419159
HMGN4_HUMAN	O00479	HMGN4 HMG17L3 NHC	HMGN4	0.000117307	0	0.000663578	0.000485473	0	0.000571141	0
HMGN5_HUMAN	P82970	HMGN5 NSBP1	HMGN5	0	0	0.000207368	0	0	0	0
HMOX1_HUMAN	P09601	HMOX1 HO HO1	HMOX1	0.000240393	0.000114656	6.70281e-05	0.000196151	0	0	0
HMOX2_HUMAN	P30519	HMOX2 HO2	HMOX2	0.000162926	0.000105101	0.000184327	0.000539415	6.27306e-05	7.93252e-05	0
ROA0_HUMAN	Q13151	HNRNPA0 HNRPA0	HNRNPA0	0.000237267	0.000122053	0.00024342	0.000104403	0.000388525	0.000197259	0.000185917
ROA1_HUMAN	P09651	HNRNPA1 HNRPA1	HNRNPA1	0.00116158	0.00148759	0.00262702	0.000924228	0.000965086	0.00120249	0.00106402
ROA2_HUMAN	P22626	HNRNPA2B1 HNRPA2B1	HNRNPA2B1	0.000866261	0.00126122	0.0026372	0.000897069	0.0010376	0.00116822	0.000934611
ROA3_HUMAN	P51991	HNRNPA3 HNRPA3	HNRNPA3	0.000499955	0.000599078	0.00117089	0.000424158	0.000357564	0.000387361	0.00020172
ROAA_HUMAN	Q99729	HNRNPAB ABBP1 HNRPAB	HNRNPAB	0.000359503	0.000420405	0.00109147	0.00072727	0.000355473	0.000430401	0.000384229
HNRPC_HUMAN	P07910	HNRNPC HNRPC	HNRNPC	0.000406006	0.00103865	0.00197253	0.00119366	0.000177122	0.00167863	0.000339025
HNRPD_HUMAN	Q14103	HNRNPD AUF1 HNRPD	HNRNPD	0.000587931	0.000763368	0.00161259	0.00129461	0.00108953	0.000944287	0.00100102
HNRDL_HUMAN	O14979	HNRNPDL HNRPDL JKTBP	HNRNPDL	0.00028779	0.000383848	0.000841426	0.00049733	0.00047457	0.000438841	0.000451051
HNRPF_HUMAN	P52597	HNRNPF HNRPF	HNRNPF	0.00044144	0.000329013	0.000462416	0.000301434	0.000572757	0.000319177	0.000526227
HNRH1_HUMAN	P31943	HNRNPH1 HNRPH HNRPH1	HNRNPH1	0.000648612	0.000720695	0.000999639	0.000493476	0.00144408	0.000773903	0.00216423
HNRH2_HUMAN	P55795	HNRNPH2 FTP3 HNRPH2	HNRNPH2	0.000270049	0.000257391	0	0	0.000537691	0	0.000823348
HNRH3_HUMAN	P31942	HNRNPH3 HNRPH3	HNRNPH3	0.000135223	0.000136348	0.000233837	0.000100825	0.000183105	0	0.00024923
HNRPK_HUMAN	P61978	HNRNPK HNRPK	HNRNPK	0.00138453	0.00217622	0.00310335	0.00147264	0.00113653	0.00146693	0.00153692
HNRPL_HUMAN	P14866	HNRNPL HNRPL P/OKcl.14	HNRNPL	0.000146726	0.000177359	0.000264258	0.000132017	0.000141144	0.000254793	9.00536e-05
HNRLL_HUMAN	Q8WVV9	HNRNPLL HNRPLL SRRF BLOCK24	HNRNPLL	0	0	0	0	7.52767e-05	0	0
HNRPM_HUMAN	P52272	HNRNPM HNRPM NAGR1	HNRNPM	0.000403021	0.000501253	0.000652991	0.00026305	0.000550099	0.000940773	0.000458119
HNRPR_HUMAN	O43390	HNRNPR HNRPR	HNRNPR	0.000280875	0.000177636	0.000297756	0.000168065	0.000318071	0.000488053	0.000211055
HNRPU_HUMAN	Q00839	HNRNPU C1orf199 HNRPU SAFA U21.1	HNRNPU	0.000406613	0.000401926	0.000696228	0.000316352	0.000388792	0.000783977	0.000544676
HNRL1_HUMAN	Q9BUJ2	HNRNPUL1 E1BAP5 HNRPUL1	HNRNPUL1	0.000119355	0.000131377	0.00019177	0.000134854	0.000439114	0.000148629	0.000204122
HNRL2_HUMAN	Q1KMD3	HNRNPUL2 HNRPUL2	HNRNPUL2	6.90039e-05	4.45135e-05	0	0.000149102	1.77122e-05	0	0
HOME3_HUMAN	Q9NSC5	HOMER3	HOMER3	2.93267e-05	0	0	0	0.000150553	0	0
HOOK3_HUMAN	Q86VS8	HOOK3	HOOK3	9.208e-05	0.000106368	0	0	1.8139e-05	0	0
HPT_HUMAN	P00738	HP	HP	0.000104732	0	0	0	0	0	0.000358614
HP1B3_HUMAN	Q5SSJ5	HP1BP3	HP1BP3	5.77886e-05	0	0	0	7.40426e-05	0	9.44825e-05
HPCL1_HUMAN	P37235	HPCAL1 BDR1	HPCAL1	0.000160769	0.000343968	0.000893017	0.000882678	0	0.000593295	0
HPDL_HUMAN	Q96IR7	HPDL GLOXD1	HPDL	0	0	0	0.000165974	0	0	0
HPRT_HUMAN	P00492	HPRT1 HPRT	HPRT1	0.000317791	0.000403589	0.000434556	0.000323649	0.000210775	0.000725933	0.000276645
HEMO_HUMAN	P02790	HPX	HPX	4.5345e-05	0	0	0	0	0	0
RASH_HUMAN	P01112	HRAS HRAS1	HRAS	0.000446883	0	0.00010533	0.000539415	0	0	0
SRCH_HUMAN	P23327	HRC HCP	HRC	0	0	0	0	6.58671e-05	0	0
HORN_HUMAN	Q86YZ3	HRNR S100A18	HRNR	0.000163859	0.0001297	0.000263205	0.00027397	0.000109445	0.000522146	0.000396492
H1BP3_HUMAN	Q53T59	HS1BP3	HS1BP3	0	0	0	0	5.25186e-05	0	0
HS2ST_HUMAN	Q7LGA3	HS2ST1 HS2ST KIAA0448	HS2ST1	6.98254e-05	0	0.000148675	0	0	0.000145596	0
H6ST2_HUMAN	Q96MM7	HS6ST2 PSEC0092	HS6ST2	0	0	6.41138e-05	0	2.18193e-05	0	0
HSC20_HUMAN	Q8IWL3	HSCB DNAJC20 HSC20	HSCB	0	0	0	0.000179805	0	0	0
DHI1_HUMAN	P28845	HSD11B1 HSD11 HSD11L SDR26C1	HSD11B1	7.33167e-05	0	0	0.000758552	0	0	0
HCD2_HUMAN	Q99714	HSD17B10 ERAB HADH2 MRPP2 SCHAD SDR5C1 XH98G2	HSD17B10	0.000511813	0.000653964	0.000831198	0.00107883	0.000390324	0.000385133	8.53842e-05
DHB12_HUMAN	Q53GQ0	HSD17B12 SDR12C1	HSD17B12	0.00031949	0.000111284	0.00031377	0.000393292	0	0.000167983	0
DHB4_HUMAN	P51659	HSD17B4 EDH17B4 SDR8C1	HSD17B4	0.000521212	0.000583313	0.000998551	0.000750043	0.000432841	0.000578519	0.000187312
DHB8_HUMAN	Q92506	HSD17B8 FABGL HKE6 RING2 SDR30C1	HSD17B8	8.73311e-05	0.000140135	0	0	0	0	0
HSDL2_HUMAN	Q6YN16	HSDL2 C9orf99 SDR13C1	HSDL2	0.000176288	0.000140135	0.000117086	0.000215766	5.01845e-05	0.000135889	0
HS90A_HUMAN	P07900	HSP90AA1 HSP90A HSPC1 HSPCA	HSP90AA1	0.00142488	0.00115735	0.00147927	0.000851318	0.0024	0.0018538	0.00203415
HS90B_HUMAN	P08238	HSP90AB1 HSP90B HSPC2 HSPCB	HSP90AB1	0.0016331	0.00142837	0.00173987	0.00112201	0.00293851	0.00201397	0.00244425
H90B3_HUMAN	Q58FF7	HSP90AB3P HSP90BC	HSP90AB3P	0.00105761	0	0	0	0	0	0
H90B4_HUMAN	Q58FF6	HSP90AB4P	HSP90AB4P	0.000430958	0	0	0	0	0.000878595	0
ENPL_HUMAN	P14625	HSP90B1 GRP94 TRA1	HSP90B1	0.00192319	0.000959621	0.00162835	0.00206763	0.00134189	0.00102378	0.00130304
ENPLL_HUMAN	Q58FF3	HSP90B2P GRP94B GRP94P1 TRAP1	HSP90B2P	0.000408023	0	0	0	0	0	0
HS12A_HUMAN	O43301	HSPA12A KIAA0417	HSPA12A	2.34613e-05	0	0	0	2.00738e-05	0	0
HSP13_HUMAN	P48723	HSPA13 STCH	HSPA13	6.76769e-05	0	0.000340296	0.000311201	0	0.00021967	0
HS71A_HUMAN	P0DMV8	HSPA1A HSP72 HSPA1 HSX70	HSPA1A	0.000920457	0.000972938	0.00127962	0.000958305	0.00067749	0.00110675	0.00133382
HS71L_HUMAN	P34931	HSPA1L	HSPA1L	0.000601042	0.00068466	0.00114954	0.000834074	0.000430153	0.00107777	0.000839815
HSP72_HUMAN	P54652	HSPA2	HSPA2	0.000882414	0.00120716	0.00162535	0.000994064	0	0.00161669	0.00144909
HSP74_HUMAN	P34932	HSPA4 APG2	HSPA4	0.00027505	6.7086e-05	0.000209004	0.000392601	0.000568579	0.000123612	0.000429192
HS74L_HUMAN	O95757	HSPA4L APG1 OSP94	HSPA4L	0	0	4.65669e-05	0.000102205	8.71625e-05	0	7.28013e-05
BIP_HUMAN	P11021	HSPA5 GRP78	HSPA5	0.00278954	0.00369606	0.00576782	0.00462328	0.00274969	0.00559942	0.00413046
HSP76_HUMAN	P17066	HSPA6 HSP70B'	HSPA6	0	0	0.000778848	0.00052422	0	0.000603318	0
HSP7C_HUMAN	P11142	HSPA8 HSC70 HSP73 HSPA10	HSPA8	0.00197195	0.00248691	0.00307938	0.00209979	0.00262938	0.00331106	0.00350677
GRP75_HUMAN	P38646	HSPA9 GRP75 HSPA9B mt-HSP70	HSPA9	0.00126753	0.00144869	0.00292293	0.00257782	0.00177002	0.00301484	0.00169788
HSPB1_HUMAN	P04792	HSPB1 HSP27 HSP28	HSPB1	0.000958871	0.000329013	0.000421422	0.00101132	0.00160372	0.00114377	0.000952219
HSPB6_HUMAN	O14558	HSPB6	HSPB6	0.000448526	0	0	0	0	0	0
HSPB7_HUMAN	Q9UBY9	HSPB7 CVHSP	HSPB7	0.000123481	0	0	0	0	0	0
HSPB8_HUMAN	Q9UJY1	HSPB8 CRYAC E2IG1 HSP22 PP1629	HSPB8	0	0.000114656	0	0	0	0	0
HPBP1_HUMAN	Q9NZL4	HSPBP1 HSPBP PP1845	HSPBP1	4.5118e-05	0	0.000170148	0	0.00011581	0.00021967	5.91121e-05
CH60_HUMAN	P10809	HSPD1 HSP60	HSPD1	0.00287801	0.00235703	0.00647729	0.00366363	0.00356639	0.00457593	0.00328799
CH10_HUMAN	P61604	HSPE1	HSPE1	0.00155088	0.000917248	0.00471305	0.00334258	0.0016424	0.00248372	0.00125748
PGBM_HUMAN	P98160	HSPG2	HSPG2	8.75423e-06	3.22699e-05	9.43252e-06	3.15266e-05	2.88908e-05	3.47691e-05	2.70353e-05
HS105_HUMAN	Q92598	HSPH1 HSP105 HSP110 KIAA0201	HSPH1	0.000139318	0.000143025	0.000203885	0.000180264	0.000527713	0.000161817	0.000356501
HTAI2_HUMAN	Q9BUP3	HTATIP2 CC3 TIP30	HTATIP2	0	0	0	0.00011987	0	0	0
HTSF1_HUMAN	O43719	HTATSF1	HTATSF1	1.36403e-05	0	0.00010288	0	2.62593e-05	0	2.68067e-05
HTRA2_HUMAN	O43464	HTRA2 OMI PRSS25	HTRA2	0.000102107	0.000128696	0.000268185	0.000307311	6.14504e-05	0.000274718	4.70484e-05
HUWE1_HUMAN	Q7Z6Z7	HUWE1 KIAA0312 KIAA1578 UREB1 HSPC272	HUWE1	1.52783e-05	0	0	3.02162e-05	3.74822e-05	0	4.78293e-06
HYAL2_HUMAN	Q12891	HYAL2 LUCA2	HYAL2	0	0	0	0	0	0.00015865	0
HYI_HUMAN	Q5T013	HYI HT036 SB156	HYI	3.91022e-05	0	0	0.000107883	0	0	0
HYOU1_HUMAN	Q9Y4L1	HYOU1 GRP170 ORP150	HYOU1	0.000415625	5.68115e-05	0.00035925	0	0.000237359	0.000117544	9.34611e-05
HYPK_HUMAN	Q9NX55	HYPK C15orf63 HSPC136	HYPK	0	0	0	0	0	0	0
IAH1_HUMAN	Q2TAA2	IAH1	IAH1	0	0	0	0	0	0.000509948	0
SYIC_HUMAN	P41252	IARS1 IARS	IARS1	0.000188421	0	2.96095e-05	0.000111603	0.000202468	0.000182748	6.35965e-05
SYIM_HUMAN	Q9NSE4	IARS2	IARS2	0.000100458	0	0	0	0	0	0
CAF17_HUMAN	Q5T440	IBA57 C1orf69	IBA57	6.96909e-05	6.63798e-05	0	8.51707e-05	5.9429e-05	0	0
ICAM1_HUMAN	P05362	ICAM1	ICAM1	0.000674832	8.69804e-05	0.000422824	0.00327194	0	0	0
ICAM2_HUMAN	P13598	ICAM2	ICAM2	7.60626e-05	0	0	0	0	0	0
ICAM5_HUMAN	Q9UMF0	ICAM5 TLCN TLN	ICAM5	0	0	0	0.000174209	0	2.94403e-05	0
ICOSL_HUMAN	O75144	ICOSLG B7H2 B7RP1 ICOSL KIAA0653	ICOSLG	0	0	0	4.90377e-05	0	0.00025961	0
IDE_HUMAN	P14735	IDE	IDE	2.48531e-05	0	0	2.74279e-05	3.82763e-05	0	0
IDHC_HUMAN	O75874	IDH1 PICD	IDH1	9.38469e-05	0	0.000113491	6.88614e-05	4.8049e-05	8.67379e-05	0
[truncated: 3,005 more rows]

## Sheet: Table S2
Table S2. List of proteins identified as cell-surface proteins (GO:00005886)
Entry ID	Entry	Gene names	Gene	Normal Muscle		Fusion Negative			Fusion Positive
				hSkMC 1	hSkMC 2	RD	RMS-MC02	Rh36	RH30	Rh41
AAK1_HUMAN	Q2M2I8	AAK1 KIAA1048	AAK1	2.81987e-05	0	0	0	0	0	0
AAMP_HUMAN	Q13685	AAMP	AAMP	0	0	0	0	0.000144147	0	0.000122626
ABCA1_HUMAN	O95477	ABCA1 ABC1 CERP	ABCA1	2.78497e-05	0	0	6.85729e-05	0	0	0
ABCAD_HUMAN	Q86UQ4	ABCA13	ABCA13	7.12801e-06	0	1.80681e-05	7.3343e-06	0	1.41551e-05	0
ABCA2_HUMAN	Q9BZC7	ABCA2 ABC2 KIAA1062	ABCA2	4.34469e-06	0	0	0	0	0	0
ABCA8_HUMAN	O94911	ABCA8 KIAA0822	ABCA8	9.83017e-06	0	0	0	0	0	0
ABCBB_HUMAN	O95342	ABCB11 BSEP	ABCB11	0	0	0	0	0	2.79225e-05	0
MRP1_HUMAN	P33527	ABCC1 MRP MRP1	ABCC1	4.94804e-05	0	0	0.000103492	0	0	0
MRP4_HUMAN	O15439	ABCC4 MRP4	ABCC4	1.56409e-05	0	0	2.15766e-05	0	0	0
ABD12_HUMAN	Q8N2K0	ABHD12 C20orf22	ABHD12	7.18186e-05	0	0	7.19219e-05	0	0	0
ABI1_HUMAN	Q8IZP0	ABI1 SSH3BP1	ABI1	3.74322e-05	0	0	0	4.106e-05	7.41215e-05	0
ACE_HUMAN	P12821	ACE DCP DCP1	ACE	3.9299e-05	0	0	0	0	0	0
ACINU_HUMAN	Q9UKV3	ACIN1 ACINUS KIAA0670	ACIN1	1.92939e-05	4.97849e-05	0.000305595	4.16897e-05	0	0	0
ACLY_HUMAN	P53396	ACLY	ACLY	0.000330037	0.000156349	5.32236e-05	0.000374261	0.000323503	0.000269533	0.000238158
ACOX1_HUMAN	Q15067	ACOX1 ACOX	ACOX1	0.000130941	0.000511304	0.000290974	9.32289e-05	4.06901e-05	3.85906e-05	9.34611e-05
PPAC_HUMAN	P24666	ACP1	ACP1	0.000196003	0	0.000296339	8.99024e-05	0.000250922	0.000305807	0.000192114
ACSL1_HUMAN	P33121	ACSL1 FACL1 FACL2 LACS LACS1 LACS2	ACSL1	6.76769e-05	0	0	0.000103734	0	0	0
ACSL4_HUMAN	O60488	ACSL4 ACS4 FACL4 LACS4	ACSL4	0.000159738	0	0	0.00010242	0	0	0
ACTB_HUMAN	P60709	ACTB	ACTB	0.00742201	0.00672649	0.00656839	0.00668823	0.00595044	0.00733061	0.00655934
ACTG_HUMAN	P63261	ACTG1 ACTG	ACTG1	0.00755531	0.0068466	0.00661795	0.00678882	0.0049826	0.00737915	0.00590066
ACL6A_HUMAN	O96019	ACTL6A BAF53 BAF53A INO80K	ACTL6A	3.74383e-05	5.36688e-05	0.000137023	6.88614e-05	8.00816e-05	6.07597e-05	7.35757e-05
ACTN1_HUMAN	P12814	ACTN1	ACTN1	0.00130181	0.00204488	0.000884818	0.00215337	0.000972019	0.000399762	0.00105197
ACTN2_HUMAN	P35609	ACTN2	ACTN2	0.000287627	0.00087315	0.000740514	0.000934277	0.00158515	0	0.000543093
ACVR1_HUMAN	Q04771	ACVR1 ACVRLK2	ACVR1	6.2051e-05	6.63798e-05	7.30331e-05	0	0	0	0
ADA_HUMAN	P00813	ADA ADA1	ADA	8.62661e-05	0	0	0.000157877	7.34407e-05	6.96514e-05	0
ADA10_HUMAN	O14672	ADAM10 KUZ MADM	ADAM10	0.000210319	0.000510492	0.0004066	0.000114778	3.5846e-05	0.000405435	0.000411674
ADA12_HUMAN	O43184	ADAM12 MLTN UNQ346/PRO545	ADAM12	2.35794e-05	0	0	0	0	0	0
ADA15_HUMAN	Q13444	ADAM15 MDC15	ADAM15	3.1661e-05	0.000122053	4.47622e-05	6.887e-05	0	0.000368478	0
ADA17_HUMAN	P78536	ADAM17 CSVP TACE	ADAM17	0	4.06844e-05	2.37842e-05	6.96019e-05	0	0.000184239	0
ADA19_HUMAN	Q9H013	ADAM19 MLTNB FKSG34	ADAM19	0	4.80463e-05	0	0	0	0	0
ADAM9_HUMAN	Q13443	ADAM9 KIAA0021 MCMP MDC9 MLTNG	ADAM9	0.000223243	0.000706835	0.000337394	0.000421553	1.65443e-05	0.00125298	0.000101335
ADDA_HUMAN	P35611	ADD1 ADDA	ADD1	0.000210613	0.000217988	0.000212018	7.60233e-05	8.36408e-05	0	0
ADDG_HUMAN	Q9UEY8	ADD3 ADDL	ADD3	0.000152725	0.000207542	0.000163865	8.02131e-05	4.76435e-05	0	0
AGRA3_HUMAN	Q8IWK6	ADGRA3 GPR125 UNQ556/PRO1113	ADGRA3	0	0	0	0	1.03119e-05	0	0
AGRE2_HUMAN	Q9UHX3	ADGRE2 EMR2	ADGRE2	0	0	0	0	0	6.34601e-05	0
AGRE5_HUMAN	P48960	ADGRE5 CD97	ADGRE5	4.46275e-05	0.000342722	0.000240427	0.000158772	0	0.000496645	0
AGRG6_HUMAN	Q86SQ4	ADGRG6 DREG GPR126 VIGR	ADGRG6	0	0	0	2.90331e-05	0	0.000250135	0
AGRL2_HUMAN	O95490	ADGRL2 KIAA0786 LEC1 LPHH1 LPHN2	ADGRL2	0.000307273	0.000139275	9.13885e-05	5.18351e-05	0.000115455	0.000420472	2.12151e-05
AGRL3_HUMAN	Q9HAR2	ADGRL3 KIAA0768 LEC3 LPHN3	ADGRL3	1.45552e-05	0	0	1.99783e-05	9.29342e-06	0	0
AGRL4_HUMAN	Q9HBW9	ADGRL4 ELTD1 ETL UNQ202/PRO228	ADGRL4	0	3.23389e-05	0	0	0	0	0
ADRM1_HUMAN	Q16186	ADRM1 GP110	ADRM1	0.000111721	0.000120116	7.58907e-05	0.000192648	0.000125461	6.7993e-05	5.48898e-05
PURA2_HUMAN	P30520	ADSS2 ADSS	ADSS2	0.000117543	0	4.42385e-05	0.000226554	3.01107e-05	5.71141e-05	0
AFAD_HUMAN	P55196	AFDN AF6 MLLT4	AFDN	5.66699e-06	1.21857e-05	0	0	0	0	0
AGRIN_HUMAN	O00468	AGRN AGRIN	AGRN	0	0	0	1.49147e-05	0.000291394	0	0
AGTR2_HUMAN	P50052	AGTR2	AGTR2	0	0	0.000161848	0	0	0.000139303	0
ATRAP_HUMAN	Q6RW13	AGTRAP ATRAP	AGTRAP	6.90039e-05	0	0	0.000380763	0	0	0
SAHH2_HUMAN	O43865	AHCYL1 DCAL IRBIT XPVKONA	AHCYL1	0.000109354	6.41296e-05	7.49806e-05	0.000137139	0.000191381	0.000103644	0
AHNK_HUMAN	Q09666	AHNAK PM227	AHNAK	0.000573652	0.000427089	4.72614e-05	0.00183608	4.30836e-05	0.000122574	5.49771e-05
AHNK2_HUMAN	Q8IVF2	AHNAK2 C14orf78 KIAA2019	AHNAK2	8.09463e-06	0	0	3.14731e-05	0	0	0
AIF1_HUMAN	P55008	AIF1 G1 IBA1	AIF1	6.90039e-05	0	0	0	0	0	0
AKA12_HUMAN	Q02952	AKAP12 AKAP250	AKAP12	0.000252305	7.26355e-05	4.63231e-05	0.000110142	0	5.33597e-05	0
AKAP9_HUMAN	Q99996	AKAP9 AKAP350 AKAP450 KIAA0803	AKAP9	0	5.56828e-06	0	0	0	0	0
AK1A1_HUMAN	P14550	AKR1A1 ALDR1 ALR	AKR1A1	0.000158523	0	0	0.000306154	0.00012207	0.000110181	0
CD166_HUMAN	Q13740	ALCAM MEMD	ALCAM	0.00256015	0.00673295	0.000654496	0.00303723	0	0.00946458	3.54673e-05
AL1A3_HUMAN	P47895	ALDH1A3 ALDH6	ALDH1A3	0.000288399	0	3.94987e-05	0.000493233	0	0.000109197	0
AL3A1_HUMAN	P30838	ALDH3A1 ALDH3	ALDH3A1	0	0	0	8.44912e-05	0	0	0
ALK_HUMAN	Q9UM73	ALK	ALK	0	1.4332e-05	0.000100542	0	0	9.26518e-05	0
LOX12_HUMAN	P18054	ALOX12 12LO LOG12	ALOX12	0	0	0	2.12927e-05	0	0.000112725	0
PPBT_HUMAN	P05186	ALPL	ALPL	0.00022222	0.000885064	0.000511232	0	0	0.000450901	0
AMBP_HUMAN	P02760	AMBP HCP ITIL	AMBP	0.00496297	0.0163635	0.012969	0.00834079	0	0.0109234	0
AMGO2_HUMAN	Q86SJ2	AMIGO2 ALI1	AMIGO2	0	0	0	2.79008e-05	0	0.000443127	0
AMOT_HUMAN	Q4VCS5	AMOT KIAA1071	AMOT	9.94124e-06	0	0	0	0	0	0
AMOL1_HUMAN	Q8IY63	AMOTL1	AMOTL1	0	0	0	0	3.5176e-05	0	0
AMPH_HUMAN	P49418	AMPH AMPH1	AMPH	0	0	0	0	2.97145e-05	0	0
ANK2_HUMAN	Q01484	ANK2 ANKB	ANK2	0	0	7.64491e-05	3.72867e-06	0.00013529	1.40899e-05	8.76467e-05
ANK3_HUMAN	Q12955	ANK3	ANK3	0	5.25507e-06	9.21636e-06	0	3.13653e-05	0	0
ANKH_HUMAN	Q9HCJ1	ANKH KIAA1581 UNQ241/PRO274	ANKH	4.36655e-05	0	0	0	0	0	0
AN13A_HUMAN	Q8IZ07	ANKRD13A ANKRD13	ANKRD13A	6.05087e-05	9.27365e-05	0	0	0	0	0
ANO10_HUMAN	Q9NW15	ANO10 TMEM16K	ANO10	1.54351e-05	0	0	0	0	0	0
AMPN_HUMAN	P15144	ANPEP APN CD13 PEPN	ANPEP	0.00289961	0.00100897	0.000189222	0.0010178	0	0.00257014	0
ANTR1_HUMAN	Q9H6X2	ANTXR1 ATR TEM8	ANTXR1	0.000107394	0.000540521	0.000493561	0.000114508	4.77947e-05	0.000595679	0.000182966
ANTR2_HUMAN	P58335	ANTXR2 CMG2	ANTXR2	0.0004908	0.000794099	0.000483082	0.000261351	5.57605e-05	0.000702527	0.000256153
ANXA1_HUMAN	P04083	ANXA1 ANX1 LPC1	ANXA1	0.00135687	0.00029105	0.00103077	0.00147521	0.000270224	0.000444384	0.000413785
ANXA2_HUMAN	P07355	ANXA2 ANX2 ANX2L4 CAL1H LPC2D	ANXA2	0.00503128	0.00685584	0.00455839	0.0083931	0.000965086	0.00401498	0.00277827
ANXA3_HUMAN	P12429	ANXA3 ANX3	ANXA3	0	0	0	0.000719219	0	0	0
ANXA4_HUMAN	P09525	ANXA4 ANX4	ANXA4	0.000276974	0	0	0.000539415	0	0	0
ANXA5_HUMAN	P08758	ANXA5 ANX5 ENX2 PP4	ANXA5	0.00198488	0.000525507	0.00103537	0.00108688	0.000418204	0.0014214	0.000320191
ANXA7_HUMAN	P20073	ANXA7 ANX7 SNX OK/SW-cl.95	ANXA7	0.000221946	0	0.00015709	0.000244263	0	0.000153837	0
AOC1_HUMAN	P19801	AOC1 ABP1 DAO1	AOC1	0	0	0.000156136	0	0	0.00010079	0
AP1M1_HUMAN	Q9BXS5	AP1M1 CLTNM	AP1M1	7.20614e-05	0	0	9.90761e-05	0.000138263	0	7.05727e-05
AP2A1_HUMAN	O95782	AP2A1 ADTAA CLAPA1	AP2A1	0.000509289	0.000595574	0.00028791	0.000483983	0.000125461	0.000283103	0.000202787
AP2A2_HUMAN	O94973	AP2A2 ADTAB CLAPA2 HIP9 HYPJ KIAA0899	AP2A2	0.000313914	0.000315304	0.000164502	0.000252814	0.000123048	0.000137196	0.000121919
AP2B1_HUMAN	P63010	AP2B1 ADTB2 CLAPB1	AP2B1	0.000532191	0.000504487	0.000326493	0.00053334	0.000215076	0.000252366	0.00010978
AP2M1_HUMAN	Q96CW1	AP2M1 CLAPM1 KIAA0109	AP2M1	0.00030547	0.000403589	0.000169125	0.000376631	0.000150553	0.000163067	0.000207484
AP2S1_HUMAN	P53680	AP2S1 AP17 CLAPS2	AP2S1	0.000207706	0.000370946	0	0	0	0	0
APC_HUMAN	P25054	APC DP2.5	APC	0	0	0	0	1.6889e-05	0	0
APLP2_HUMAN	Q06481	APLP2 APPL2	APLP2	2.69671e-05	0	0.000127122	0	0	0	0
APOA1_HUMAN	P02647	APOA1	APOA1	0.000570469	0	0	0	0	0	0.000483385
APOB_HUMAN	P04114	APOB	APOB	0	0	1.71467e-05	3.13613e-06	0	0	0
APOE_HUMAN	P02649	APOE	APOE	7.35626e-05	0.000140135	0.00042466	0.0001623	0	0.000713927	0
A4_HUMAN	P05067	APP A4 AD1	APP	2.69671e-05	0	0.000279669	1.86005e-05	5.1915e-05	0	0
DP13A_HUMAN	Q9UKG1	APPL1 APPL DIP13A KIAA1428	APPL1	1.46633e-05	0	0	0	4.70479e-05	0	0
DP13B_HUMAN	Q8NEU8	APPL2 DIP13B	APPL2	2.37784e-05	0	0	0	0	0	0
AQP1_HUMAN	P29972	AQP1 CHIP28	AQP1	0.00069112	0	0	0	0	0	0
ARAP1_HUMAN	Q96P48	ARAP1 CENTD2 KIAA0782	ARAP1	0	0	2.73077e-05	9.98916e-06	0	0	0
ARF1_HUMAN	P84077	ARF1	ARF1	0.00110661	0.000240232	0.000693815	0	0	0.000582383	0
ARF3_HUMAN	P61204	ARF3	ARF3	0	0	0.00031599	0.000462355	0	0.000271972	0
ARF4_HUMAN	P18085	ARF4 ARF2	ARF4	0.00126107	0.000240232	0.000508009	0.000494402	0.00017923	0.000543944	0
ARF5_HUMAN	P84085	ARF5	ARF5	0.000868646	0	0.00031599	0.000308237	0	0.000378646	0
ARF6_HUMAN	P62330	ARF6	ARF6	0.000176403	0	0.000110596	0.000161824	0	0	0
ARFG2_HUMAN	Q8N6H7	ARFGAP2 ZNF289 Nbla10535	ARFGAP2	2.05801e-05	0	0	0.000141951	3.96193e-05	0	0
ARFP2_HUMAN	P53365	ARFIP2 POR1	ARFIP2	0	0	5.82086e-05	0.000255512	0	0	0
RHG17_HUMAN	Q68EM7	ARHGAP17 RICH1 MSTP066 MSTP110	ARHGAP17	2.46961e-05	0	0	0	0	0	0
RHG18_HUMAN	Q8N392	ARHGAP18	ARHGAP18	6.25636e-05	0	0	0.000107883	0	0	0
RHG21_HUMAN	Q5T5U3	ARHGAP21 ARHGAP10 KIAA1424	ARHGAP21	5.40584e-06	0	0	0	0	0	0
RHG35_HUMAN	Q9NRY4	ARHGAP35 GRF1 GRLF1 KIAA1722 P190A p190ARHOGAP	ARHGAP35	2.40101e-05	0	0	0	0	0	0
ARHGI_HUMAN	Q6ZSZ5	ARHGEF18 KIAA0521	ARHGEF18	0	0	2.73874e-05	0	0	0	0
ARHG2_HUMAN	Q92974	ARHGEF2 KIAA0651 LFP40	ARHGEF2	3.14214e-05	0	0	0	0.000383105	0.000109197	0.000144086
ARL2_HUMAN	P36404	ARL2	ARL2	8.37905e-05	0	0	0	0	0	0
PRAF3_HUMAN	O75915	ARL6IP5 DERP11 JWA PRA2 PRAF3 HSPC127	ARL6IP5	0.000480562	0.000114656	0.000301626	0.000882678	0	0.000129805	0
ARL8A_HUMAN	Q96BM9	ARL8A ARL10B GIE2	ARL8A	0	0	0.00010533	0.000770592	0	0	0
ARPC2_HUMAN	O15144	ARPC2 ARC34 PRO2446	ARPC2	0.00124719	0.00155797	0.000617946	0.000778575	0.000221402	0.000239805	0.000406831
ARRB1_HUMAN	P49407	ARRB1 ARR1	ARRB1	0	0	0.000329436	0	0.000176179	0.000173476	0.000294303
ASAP1_HUMAN	Q9ULH1	ASAP1 DDEF1 KIAA1249	ASAP1	1.39651e-05	0	0	0	1.7923e-05	0	0
ASPH_HUMAN	Q12797	ASPH BAH	ASPH	0.000423467	0.00024931	0.0001286	0.000268388	0.00011379	0	0
ASPC1_HUMAN	Q9BZE9	ASPSCR1 ASPL RCC17 TUG UBXD9 UBXN9	ASPSCR1	0	0	0	0	3.76383e-05	0	0
ATAD1_HUMAN	Q8NBU5	ATAD1 FNP001	ATAD1	2.86114e-05	0	0	7.89387e-05	0	0	0
ATD3B_HUMAN	Q5T9A4	ATAD3B KIAA1273 TOB3	ATAD3B	0.000208902	0	0.000121201	0.000155174	0	0.00011169	7.89511e-05
PUR9_HUMAN	P31939	ATIC PURH OK/SW-cl.86	ATIC	0.000262093	0	6.50482e-05	4.97921e-05	0.000312688	0.000376309	5.32009e-05
AT11C_HUMAN	Q8NB49	ATP11C ATPIG ATPIQ	ATP11C	1.36403e-05	0	0	2.50891e-05	0	0	0
AT12A_HUMAN	P54707	ATP12A ATP1AL1	ATP12A	7.11447e-05	0	0	0	0	0	0
AT1A1_HUMAN	P05023	ATP1A1	ATP1A1	0.000432044	0.000357159	0.000449033	0.000482086	0.000139895	0.000463821	0.000183614
AT1A2_HUMAN	P50993	ATP1A2 KIAA0778	ATP1A2	0.000204819	0	0.000533232	0.000274523	0	0.000229476	0
AT1B1_HUMAN	P05026	ATP1B1 ATP1B	ATP1B1	5.04429e-05	7.20695e-05	0.000182138	0.000182997	0.000107538	0.00048955	0
AT1B3_HUMAN	P54709	ATP1B3	ATP1B3	0.000413513	0.000709434	0.000750156	0.000342017	7.05719e-05	0.000968719	0.000144086
AT2A2_HUMAN	P16615	ATP2A2 ATP2B	ATP2A2	0.000350166	4.38684e-05	0.000265307	0.000534724	7.85496e-05	0.000104593	0.000100234
AT2B1_HUMAN	P20020	ATP2B1 PMCA1	ATP2B1	0.000139314	9.34234e-05	0.000173807	0.000174631	0.000128249	7.54941e-05	0.000136615
AT2B3_HUMAN	Q16720	ATP2B3	ATP2B3	7.00338e-05	0	0.000132055	9.66116e-05	0	2.13112e-05	0
AT2B4_HUMAN	P23634	ATP2B4 ATP2B2 MXRA1	ATP2B4	0.000174645	0.000100532	0.000144256	0.000211075	5.45483e-05	0	0
ATPA_HUMAN	P25705	ATP5F1A ATP5A ATP5A1 ATP5AL2 ATPM	ATP5F1A	0.00174354	0.000987953	0.0019287	0.00211367	0.00106642	0.0013557	0.00111426
ATPB_HUMAN	P06576	ATP5F1B ATP5B ATPMB ATPSB	ATP5F1B	0.00176385	0.000730178	0.00193778	0.00203768	0.00104331	0.0018745	0.000889793
ATPO_HUMAN	P48047	ATP5PO ATP5O ATPO	ATP5PO	0.000855582	0.00060319	0.000888093	0.000592128	0.000458206	0.000673671	0.000100234
VAS1_HUMAN	Q15904	ATP6AP1 ATP6IP1 ATP6S1 VATPS1 XAP3	ATP6AP1	6.22075e-05	0	4.25371e-05	0.000248961	0	0.000105856	0
RENR_HUMAN	O75787	ATP6AP2 ATP6IP2 CAPER ELDF10 HT028 MSTP009 PSEC0072	ATP6AP2	7.51966e-05	0	0	0.000290454	0	7.32232e-05	0
VPP1_HUMAN	Q93050	ATP6V0A1 ATP6N1 ATP6N1A VPP1	ATP6V0A1	3.67198e-05	0	0	0	0	0.000127396	0
VPP2_HUMAN	Q9Y487	ATP6V0A2	ATP6V0A2	1.19701e-05	0	0	0	0	0	0
VATL_HUMAN	P27449	ATP6V0C ATP6C ATP6L ATPL	ATP6V0C	7.33167e-05	0	0	0.00020228	0	0	0
VA0D1_HUMAN	P61421	ATP6V0D1 ATP6D VPATPD	ATP6V0D1	0.000139597	0	0.000104072	0.000161824	5.64575e-05	0.000254793	0
VATA_HUMAN	P38606	ATP6V1A ATP6A1 ATP6V1A1 VPP2	ATP6V1A	0.00025066	0.000111284	0.000418985	0.000350959	0.000188192	0.000809341	6.78051e-05
VATB1_HUMAN	P15313	ATP6V1B1 ATP6B1 VATB VPP3	ATP6V1B1	4.13674e-05	0	0	0	0	0	0
VATB2_HUMAN	P21281	ATP6V1B2 ATP6B2 VPP3	ATP6V1B2	0.000211619	8.85064e-05	0.000443922	0.000387159	0.00018489	0.000507815	6.06677e-05
VATC1_HUMAN	P21283	ATP6V1C1 ATP6C ATP6D VATC	ATP6V1C1	6.66515e-05	0	0	0.000331004	5.1325e-05	9.26518e-05	0
VATD_HUMAN	Q9Y5K8	ATP6V1D ATP6M VATD	ATP6V1D	0.000126002	0	0	0	0	0.000145596	0
VATE1_HUMAN	P36543	ATP6V1E1 ATP6E ATP6E2	ATP6V1E1	0.000226271	0.000145525	0.00049037	0.000327584	5.79051e-05	0.000783977	0
VATG1_HUMAN	O75348	ATP6V1G1 ATP6G ATP6G1 ATP6J	ATP6V1G1	0.000126107	0	0.000608679	0.000417343	0	0.000873575	0
VATH_HUMAN	Q9UI12	ATP6V1H CGI-11	ATP6V1H	2.09476e-05	0	0	0	0	0	0
AT8B1_HUMAN	O43520	ATP8B1 ATPIC FIC1 PFIC	ATP8B1	1.22194e-05	0	0	0	0	0	0
ATRN_HUMAN	O75882	ATRN KIAA0548 MGCA	ATRN	1.85187e-05	3.96609e-05	4.17345e-05	7.23689e-05	1.89375e-05	0.000251446	0
ATX10_HUMAN	Q9UBB4	ATXN10 SCA10	ATXN10	0.000138667	9.51861e-05	0	0	0.000184641	0.000161644	0.000152242
UFO_HUMAN	P30530	AXL UFO	AXL	3.30382e-05	0.000154435	0.000112853	4.05871e-05	0	0.000466238	0
ZA2G_HUMAN	P25311	AZGP1 ZAG ZNGP1	AZGP1	0.000934418	0.00089027	0.000839888	0.001113	0.000177122	0.00155903	0.00152561
B2MG_HUMAN	P61769	B2M CDABP0092 HDCMA22P	B2M	0.000546536	0.000630608	0.000450684	0.00105614	0	0.00183581	0.000658678
B4GT1_HUMAN	P15291	B4GALT1 GGTB2	B4GALT1	8.01831e-05	0	5.02711e-05	0.000294226	0	0	0
BAG3_HUMAN	O95817	BAG3 BIS	BAG3	8.99673e-05	0.000162738	0.000122762	0.00027983	7.28484e-05	0.000644837	0
BAG4_HUMAN	O95429	BAG4 SODD	BAG4	0	0	8.84771e-05	0	9.0332e-05	0.000171342	0.000253591
BAIP2_HUMAN	Q9UQB8	BAIAP2	BAIAP2	0	0	0	0	2.46809e-05	0	0
BASP1_HUMAN	P80723	BASP1 NAP22	BASP1	0.000715452	0.000274177	0	0.00169342	0.000785496	0.000124161	0.000100234
BCAM_HUMAN	P50895	BCAM LU MSK19	BCAM	0.000197719	0.000432955	0.000531096	0.000203268	0.000146059	0.00178081	0.000275268
BAP29_HUMAN	Q9UHQ4	BCAP29 BAP29	BCAP29	0.000125686	0	0	0	0	0	0
BAP31_HUMAN	P51572	BCAP31 BAP31 DXS1357E	BCAP31	0.000566218	0.000360348	0.000460004	0.000653383	0.00029573	0.000262181	0
BCL10_HUMAN	O95999	BCL10 CIPER CLAP	BCL10	4.5118e-05	0	0	0	0	0	0
BKRB2_HUMAN	P30411	BDKRB2 BKR2	BDKRB2	2.66606e-05	0	0	0	0	0	0
BICD2_HUMAN	Q8TD16	BICD2 KIAA0699	BICD2	5.61575e-05	0	0	0	0	0	0
BIN1_HUMAN	O00499	BIN1 AMPHL	BIN1	0	0	0	4.97921e-05	0.000231621	0	3.54673e-05
BLVRB_HUMAN	P30043	BLVRB FLR	BLVRB	7.99818e-05	0	0	0.00022067	0	0	0
BOC_HUMAN	Q9BWV1	BOC UNQ604/PRO1190	BOC	0	0	0	0	0	0.000354013	0
BASI_HUMAN	P35613	BSG UNQ6505/PRO21383	BSG	0.000805171	0.00180174	0.00133201	0.00152012	0.000250922	0.00375871	0.000494009
BST1_HUMAN	Q10588	BST1	BST1	9.81655e-05	0.000245236	6.14424e-05	0.00056805	0	0	0
BST2_HUMAN	Q10589	BST2	BST2	0	0	0.000552982	0.000357298	0.000112915	0.000224268	0
BTK_HUMAN	Q06187	BTK AGMX1 ATK BPK	BTK	0	4.97849e-05	5.82086e-05	6.3878e-05	0	7.51502e-05	0
BT2A1_HUMAN	Q7KYR7	BTN2A1 BT2.1 BTF1	BTN2A1	2.93267e-05	0.000420405	0.000214669	0.000208245	0	0.000809117	0
BT3A2_HUMAN	P78410	BTN3A2 BT3.2 BTF3 BTF4	BTN3A2	0	0	0	8.99024e-05	0	0.000793252	0
BT3A3_HUMAN	O00478	BTN3A3 BTF3	BTN3A3	5.4414e-05	3.88067e-05	0	4.97921e-05	0	0.000527207	0
C1QBP_HUMAN	Q07021	C1QBP GC1QBP HABP1 SF2P32	C1QBP	0.000236981	0.000162738	0.000245525	0.000261007	0.000461373	0	0
C2CD5_HUMAN	Q86YS7	C2CD5 CDP138 KIAA0528	C2CD5	0	0	4.02169e-05	0	0	0	0
CO3_HUMAN	P01024	C3 CPAMD1	C3	5.67419e-05	0	1.18285e-05	6.0576e-05	0	0	8.01333e-05
CO4A_HUMAN	P0C0L4	C4A CO4 CPAMD2	C4A	0.000100686	0.000228718	0.000194833	4.41305e-05	0	4.22454e-05	0
CAH12_HUMAN	O43570	CA12	CA12	0.000105729	0	0	0.00027255	0	0	0
CAH14_HUMAN	Q9ULX7	CA14 UNQ690/PRO1335	CA14	0	0	0.000232834	0	0	0.000214562	0
CAHD1_HUMAN	Q5VU97	CACHD1 KIAA1573 VWCD1	CACHD1	1.66052e-05	0	6.23078e-05	0	0	4.30635e-05	0
CA2D1_HUMAN	P54289	CACNA2D1 CACNL2A CCHL2A MHS3	CACNA2D1	0.000431066	0.000242154	0.000361165	0.000475531	0.000445638	0.0011912	0.000193651
CA2D2_HUMAN	Q9NY47	CACNA2D2 KIAA0558	CACNA2D2	0	0	0	0	4.05336e-05	8.78679e-05	0
CADM1_HUMAN	Q9BY67	CADM1 IGSF4 IGSF4A NECL2 SYNCAM TSLC1	CADM1	0	0	4.51414e-05	3.30254e-05	9.21755e-05	0.000466238	0
CADM2_HUMAN	Q8N3J6	CADM2 IGSF4D NECL3	CADM2	0	0	0.00105988	0	0	0	0.00103262
CADM3_HUMAN	Q8N126	CADM3 IGSF4B NECL1 SYNCAM3 TSLL1 UNQ225/PRO258	CADM3	0	0	0	0.000150534	0	0	0
CALB2_HUMAN	P22676	CALB2 CAB29	CALB2	0	0	0	0.00020228	0	0	0
CALD1_HUMAN	Q05682	CALD1 CAD CDM	CALD1	0.0011607	0.00435323	0.000823292	0.00274656	0.000299488	0.000901339	0.000235495
CAHM2_HUMAN	Q9HA72	CALHM2 FAM26B	CALHM2	0.000130997	0	0	0	0	0	0
CALM1_HUMAN	P0DP23	CALM1 CALM CAM CAM1	CALM1	0.00272004	0.0020773	0.00145409	0.00236227	0.000398524	0.00207545	0.000339025
CALR_HUMAN	P27797	CALR CRTC	CALR	0.00171423	0.000499231	0.00135113	0.00152829	0.00103505	0.00070499	0.000792472
KCC2D_HUMAN	Q13557	CAMK2D CAMKD	CAMK2D	0.000120712	4.50434e-05	0	0	5.37691e-05	0	0
CANT1_HUMAN	Q8WVQ1	CANT1 SHAPY	CANT1	3.91022e-05	0	9.83079e-05	0.000251727	0	0	0
CALX_HUMAN	P27824	CANX	CANX	0.000717305	0.000185473	0.000649561	0.000945272	0.000354243	0.00047961	0.000372928
CAP1_HUMAN	Q01518	CAP1 CAP	CAP1	0.000711856	0.000266796	0.000205157	0.000429622	0.000318478	0.000705579	0.000487675
CAP2_HUMAN	P40123	CAP2	CAP2	0	0	4.17345e-05	6.10658e-05	0.000156235	0	6.52464e-05
CAN1_HUMAN	P07384	CAPN1 CANPL1 PIG30	CAPN1	0.000265303	9.22841e-05	9.28203e-05	0.000124433	0.000137701	3.48257e-05	8.43429e-05
CAN2_HUMAN	P17655	CAPN2 CANPL2	CAPN2	0.00027971	9.45912e-05	2.76491e-05	9.72017e-05	3.76383e-05	0.000107089	7.20429e-05
CPNS1_HUMAN	P04632	CAPNS1 CAPN4 CAPNS	CAPNS1	0.000220582	0.000225217	0.000230002	0.000219925	0.000134423	0.000313176	8.23348e-05
CSKP_HUMAN	O14936	CASK LIN2	CASK	1.11721e-05	0	0.00021066	6.03508e-05	0.000501845	0.000135889	0.000120758
CASP3_HUMAN	P42574	CASP3 CPP32	CASP3	8.2758e-05	0	0.000138245	0.00015171	0.000376383	0.000152939	0.000144086
CATA_HUMAN	P04040	CAT	CAT	0.000583761	0.000273264	0.000470552	0.000614654	0.000263468	0.000299109	0.000326595
CAV1_HUMAN	Q03135	CAV1 CAV	CAV1	0.000896972	0.00182876	0.00091071	0.000721403	0	0.00671091	0
CAV2_HUMAN	P51636	CAV2	CAV2	0.000162926	0.000140135	0	0	0	0	0
CAV3_HUMAN	P56539	CAV3	CAV3	0	0	0.00117102	0.000190382	0	0.00117588	0
CAVN1_HUMAN	Q6NZI2	CAVIN1 PTRF FKSG13	CAVIN1	0.00155305	0.00164251	0.000720162	0.00113616	0	0	0
CAVN2_HUMAN	O95810	CAVIN2 SDPR	CAVIN2	0	0.000348847	0.00112949	0.000179768	0	0	0
CAVN3_HUMAN	Q969G5	CAVIN3 PRKCDBP SRBC	CAVIN3	0.000557009	0.000675652	0	0.000313007	0	0	0
CAVN4_HUMAN	Q5BKX8	CAVIN4 MURC	CAVIN4	0	0.000120116	0	0	0	0	0
CBARP_HUMAN	Q8N350	CBARP C19orf26	CBARP	4.77961e-05	5.11304e-05	0	0	0	0	0
CC124_HUMAN	Q96CT7	CCDC124	CCDC124	0.00015814	0	0.000425371	0	0.000463241	0.000235193	0.000133002
CCDC8_HUMAN	Q9H0W5	CCDC8	CCDC8	0	0	0	0	0.000140346	0	5.86112e-05
GRDN_HUMAN	Q3V6T2	CCDC88A APE GRDN KIAA1212	CCDC88A	0	0	0	0	2.43952e-05	0	0
CCN2_HUMAN	P29279	CCN2 CTGF HCS24 IGFBP8	CCN2	0.000185221	0.000232329	0	0	0	0.0001503	0
CCNT2_HUMAN	O60583	CCNT2	CCNT2	0	0	0	0	1.85868e-05	0	0
CCNY_HUMAN	Q8ND76	CCNY C10orf9 CBCP1 CFP1	CCNY	6.046e-05	0	5.67161e-05	8.29869e-05	9.65086e-05	0	0
CCYL1_HUMAN	Q8N7R7	CCNYL1	CCNYL1	0	0	0	0.000157877	0	0	0
TCPG_HUMAN	P49368	CCT3 CCTG TRIC5	CCT3	0.000602069	0.000289459	0.000555578	0.0003714	0.000863831	0.000474516	0.000453516
CD109_HUMAN	Q6YHK3	CD109 CPAMD7	CD109	0.000403688	0.000443761	0.000136539	0.000509664	0	0.000373953	0
CD14_HUMAN	P08571	CD14	CD14	5.86533e-05	0	0	8.09122e-05	0	0.000152876	0
CD151_HUMAN	P48509	CD151 TSPAN24	CD151	0.000178476	0.0013513	0.000620329	0.00089248	8.06536e-05	0.0010417	0.000247004
OX2G_HUMAN	P41217	CD200 MOX1 MOX2 My033	CD200	0	0	0	0.000505263	0	0	0
CD248_HUMAN	Q9HCU0	CD248 CD164L1 TEM1	CD248	0.000530681	0.000529399	0	0.000182543	2.78803e-05	0	0
PD1L1_HUMAN	Q9NZQ7	CD274 B7H1 PDCD1L1 PDCD1LG1 PDL1	CD274	5.35001e-05	0.000458624	6.70281e-05	0.000128017	0	0.000519219	0
CD276_HUMAN	Q5ZPR3	CD276 B7H3 PSEC0249 UNQ309/PRO352	CD276	0.000211826	0.000154886	0.000539847	0.000387159	6.60322e-05	0.000916053	0.000182003
CD2AP_HUMAN	Q9Y5K6	CD2AP	CD2AP	2.48662e-05	0	0	0	0	4.02212e-05	0
CD320_HUMAN	Q9NPF0	CD320 8D6A UNQ198/PRO224	CD320	0	0.000347922	0.00091528	0.000223206	0	9.84726e-05	0
CD36_HUMAN	P16671	CD36 GP3B GP4	CD36	0	0	0.00031418	0	8.52189e-05	0	0
TNR5_HUMAN	P25942	CD40 TNFRSF5	CD40	0.000266219	0	0	0	0	0	0
CD44_HUMAN	P16070	CD44 LHR MDU2 MDU3 MIC4	CD44	0.00096891	0.00163035	0.00159916	0.00135247	6.42606e-05	0.00227604	8.43429e-05
MCP_HUMAN	P15529	CD46 MCP MIC10	CD46	0.000140572	0.000515952	0.000597322	0.000322296	0	0.00111251	0.000130987
CD47_HUMAN	Q08722	CD47 MER6	CD47	9.24225e-05	0.000144139	0.000152403	0.000323649	0	0.000262217	0
DAF_HUMAN	P08174	CD55 CR DAF	CD55	5.72228e-05	0.000246091	0.000207842	0.000355224	0	0.00201989	0
LFA3_HUMAN	P19256	CD58 LFA3	CD58	0	9.00869e-05	0.000429826	0.00016213	0	0.000327772	0.000123502
CD59_HUMAN	P13987	CD59 MIC11 MIN1 MIN2 MIN3 MSK21	CD59	0.00216477	0.00441426	0.00198403	0.003183	0.000752767	0.00342331	0.000494009
CD63_HUMAN	P08962	CD63 MLA1 TSPAN30	CD63	0.000248603	0.000388067	0.000545454	0.000641403	0.00011581	0.000988514	0
CD70_HUMAN	P32970	CD70 CD27L CD27LG TNFSF7	CD70	0	0	0	0	0	0.00122387	0
CD81_HUMAN	P60033	CD81 TAPA1 TSPAN28	CD81	0.00104225	0.00087315	0.000925778	0.000822887	0.00011581	0.00197703	0
CD82_HUMAN	P27701	CD82 KAI1 SAR2 ST6 TSPAN27	CD82	0	0	0.000442385	0.000593356	5.01845e-05	0.000380761	0
CD9_HUMAN	P21926	CD9 MIC3 TSPAN29 GIG2	CD9	0.00024717	0.000554935	0.000658359	0.000915087	0	0.00095439	0.00018443
CD99_HUMAN	P14209	CD99 MIC2 MIC2X MIC2Y	CD99	0.000945424	0.00152674	0.00195849	0.000939131	0.000316954	0.0025012	0.000424674
C99L2_HUMAN	Q8TCZ2	CD99L2 MIC2L1 UNQ1964/PRO4486	CD99L2	0.000620906	0.000630608	0.000464664	0.000353158	0	0.00234576	0
CDC42_HUMAN	P60953	CDC42	CDC42	0.000867522	0.000360348	0.000464664	0.000521169	0.000215076	0.000563164	0.00010978
MRCKB_HUMAN	Q9Y5S2	CDC42BPB KIAA1124	CDC42BPB	2.1194e-05	1.95033e-05	0	0	1.16407e-05	0	0
BORG5_HUMAN	Q00587	CDC42EP1 BORG5 CEP1 MSE55	CDC42EP1	8.83489e-05	9.45912e-05	0	0	5.64575e-05	0	0
BORG1_HUMAN	O14613	CDC42EP2 BORG1 CEP2	CDC42EP2	8.02501e-05	0	0	0	0	0	0
CDCP1_HUMAN	Q9H5V8	CDCP1 TRASK UNQ2486/PRO5773	CDCP1	0.000382895	0.000664512	0	0.000342154	0	0	0
CAD11_HUMAN	P55287	CDH11	CDH11	0.000495435	0.000200648	0.000197377	0.0003524	3.42167e-05	0.000138978	0
CAD12_HUMAN	P55289	CDH12	CDH12	2.67948e-05	0	0	0	0	0	0
CAD13_HUMAN	P55290	CDH13 CDHH	CDH13	6.41441e-05	0.000420405	0.000573812	0.000557768	0.000173715	0.00129706	0.000206892
CAD15_HUMAN	P55291	CDH15 CDH14 CDH3	CDH15	0	0.000113368	0.00072074	0	7.61225e-05	0.000183222	9.06607e-05
CADH2_HUMAN	P19022	CDH2 CDHN NCAD	CDH2	0.000235646	0.000668445	0.000565283	0.000538203	0.000180664	0.000507871	0
CADH4_HUMAN	P55283	CDH4	CDH4	0	0	6.63578e-05	0.000100674	9.78597e-05	5.71141e-05	6.91612e-05
CADH6_HUMAN	P55285	CDH6	CDH6	2.66606e-05	0.000157652	0	0.000168022	0	0	0
CDHR1_HUMAN	Q96JP9	CDHR1 KIAA1775 PCDH21 PRCAD	CDHR1	1.24794e-05	0	0	0	0	0	0
CDIPT_HUMAN	O14735	CDIPT PIS PIS1	CDIPT	9.77556e-05	0	0	0	0	0	0
CDK16_HUMAN	Q00536	CDK16 PCTAIRE1 PCTK1	CDK16	4.18952e-05	0	0	0	0	0	0
CDK5_HUMAN	Q00535	CDK5 CDKN5	CDK5	0	0	0	0.000256034	0	0	0
CDON_HUMAN	Q4KMG0	CDON CDO	CDON	0	6.35145e-05	6.97317e-05	0	0.000113727	0.000476919	0
CDSN_HUMAN	Q15517	CDSN	CDSN	0.000203882	0	8.50741e-05	0.00012448	5.79051e-05	0.000164752	0.000399007
CDV3_HUMAN	Q9UKY7	CDV3 H41	CDV3	8.71125e-05	0	8.19232e-05	0	0.000111521	0.000105767	0
CEMIP_HUMAN	Q8WUJ3	CEMIP KIAA1199	CEMIP	0.000111173	0	0	0	0	0	0
CEIP2_HUMAN	Q9UHN6	CEMIP2 KIAA1412 TMEM2	CEMIP2	0.00022188	0.000614229	0.00043382	0.000411483	6.35453e-05	0.000378733	5.23948e-05
CE170_HUMAN	Q5SW79	CEP170 FAM68A KAB KIAA0470	CEP170	8.04389e-05	0	0	0	8.60305e-06	0	0
CEP55_HUMAN	Q53EZ4	CEP55 C10orf3 URCC6	CEP55	0	0	0	0	0.000125461	0	0
CEP89_HUMAN	Q96ST8	CEP89 CCDC123	CEP89	1.30341e-05	0	0	0	0	0	0
GT253_HUMAN	Q5T4B2	CERCAM CEECAM1 GLT25D3 KIAA1502	CERCAM	6.90039e-05	0	0	0	0	0	0
CFAB_HUMAN	P00751	CFB BF BFD	CFB	0	0	0	3.76336e-05	0	0	5.36133e-05
COF1_HUMAN	P23528	CFL1 CFL	CFL1	0.00505188	0.00504487	0.00387904	0.00354718	0.00340726	0.00521616	0.00224471
CING_HUMAN	Q9P2M7	CGN KIAA1319	CGN	0	0	0	0	0	0	0.00033055
NCHL1_HUMAN	O00533	CHL1 CALL	CHL1	0	0	0	9.58959e-05	0	0	0
CHMP3_HUMAN	Q9Y3E7	CHMP3 CGI149 NEDF VPS24 CGI-149	CHMP3	0	0	0	0	6.02214e-05	0	0
CHM4B_HUMAN	Q9H444	CHMP4B C20orf178 SHAX1	CHMP4B	0.00010593	0	0.000176954	0.000323649	0.000301107	0.000138648	0.00018443
CHP1_HUMAN	Q99653	CHP1 CHP	CHP1	0.000562422	0.00085992	0.00177417	0.00189585	0.000171083	0.00366205	0.000471554
CTRO_HUMAN	O14578	CIT CRIK KIAA0949 STK21	CIT	0	0	0	0	6.51746e-06	0	0
CKAP4_HUMAN	Q07065	CKAP4	CKAP4	0.00227547	0.00221668	0.00189142	0.00526015	0.000946661	0.00133795	0.000995502
CKAP5_HUMAN	Q14008	CKAP5 KIAA0097	CKAP5	5.1984e-05	0	1.95746e-05	3.58019e-05	7.32782e-05	0.00010823	3.57027e-05
CLAP2_HUMAN	O75122	CLASP2 KIAA0627	CLASP2	2.07991e-05	0	0	0	0	0	0
CLD11_HUMAN	O75508	CLDN11 OSP OTM	CLDN11	0.000266606	0	0	0	0	0	0
CLC14_HUMAN	Q86T13	CLEC14A C14orf27 EGFR5 UNQ236/PRO269	CLEC14A	0	0	0.000382834	0	0	0	0
CLIC1_HUMAN	O00299	CLIC1 G6 NCC27	CLIC1	0.000707871	0.000467117	0.00051317	0.000654242	0.000446084	0.000460627	0.00021346
CLIC4_HUMAN	Q9Y696	CLIC4	CLIC4	0.000435454	0.000217451	0.000186184	0.000145674	0.000181702	0.00028115	7.94956e-05
CLMP_HUMAN	Q9H6B4	CLMP ACAM ASAM UNQ318/PRO363	CLMP	0.000761297	0.000799796	0.000131691	0.000201711	0	6.96514e-05	0
ICLN_HUMAN	P54105	CLNS1A CLCI ICLN	CLNS1A	0	0	0	0	8.68577e-05	0	0
CLPT1_HUMAN	O96005	CLPTM1	CLPTM1	6.56768e-05	6.63798e-05	0.000116417	0.000149049	0	0	3.03339e-05
CLCA_HUMAN	P09496	CLTA	CLTA	0.00053452	0.000700676	0.000402367	0.000964652	0.000362443	0.000203872	0.000256153
CLCB_HUMAN	P09497	CLTB	CLTB	0.000400496	0.000403589	8.84771e-05	0.000924968	0	0	0
CLH1_HUMAN	Q00610	CLTC CLH17 CLTCL2 KIAA0034	CLTC	0.00064355	0.00095905	0.000236816	0.000433888	0.000494003	0.000268615	0.000366218
CKLF6_HUMAN	Q9NX76	CMTM6 CKLFSF6	CMTM6	5.86533e-05	0	0.000110596	0	0	0.000142785	0
CNNM3_HUMAN	Q8NE01	CNNM3 ACDP3	CNNM3	0	0	0.000116417	0	0	3.75751e-05	0
CN37_HUMAN	P09543	CNP	CNP	0.000245065	0.000262753	0.000303544	0	0.000125461	0	9.60572e-05
CNR2_HUMAN	P34972	CNR2 CB2A CB2B	CNR2	5.89485e-05	0	0	0	0	0	0
CNRP1_HUMAN	Q96F85	CNRIP1 C2orf32	CNRIP1	0.000139382	0	0.000232834	0.000340683	0.000277335	0	0
CNST_HUMAN	Q6PJW8	CNST C1orf71	CNST	2.1995e-05	0	0	0	0	0	0
CNTFR_HUMAN	P26992	CNTFR	CNTFR	0	0	0	0	0.000110161	0	0
CNTN3_HUMAN	Q9P232	CNTN3 KIAA1496 PANG	CNTN3	0	0	0	0	1.33233e-05	0.000227446	0
CNTN6_HUMAN	Q9UQ52	CNTN6	CNTN6	0	0	0	0	1.98097e-05	0	0
CNTP1_HUMAN	P78357	CNTNAP1 CASPR NRXN4	CNTNAP1	7.54236e-05	0	0	7.26135e-05	0	0	0
CNTP2_HUMAN	Q9UHC6	CNTNAP2 CASPR2 KIAA0868	CNTNAP2	0	0	0	0	1.01725e-05	0	0
CNTP4_HUMAN	Q9C0A0	CNTNAP4 CASPR4 KIAA1763	CNTNAP4	7.31774e-05	0	0	0	0	0	0
COA6_HUMAN	Q5JTJ3	COA6 C1orf31	COA6	0	0	0	0.000231178	0	0	0
COBL_HUMAN	O75128	COBL KIAA0633	COBL	0	0	0	0	2.76753e-05	0	0
COQA1_HUMAN	Q96A83	COL26A1 EMID2 EMU2	COL26A1	0	0	0	0	0.000200738	0	0
CO6A1_HUMAN	P12109	COL6A1	COL6A1	0.00104459	0.000821526	9.60777e-05	0.000392177	7.59673e-05	0.000235792	0
CO6A2_HUMAN	P12110	COL6A2	COL6A2	0.000504671	0.000347124	0	0.000222694	3.45306e-05	0	0
CO6A3_HUMAN	P12111	COL6A3	COL6A3	0.000712016	0.00067827	1.21014e-05	0.000216444	9.40959e-05	0	0
COL12_HUMAN	Q5KU26	COLEC12 CLP1 NSR2 SCARA4 SRCL	COLEC12	0.000262051	0	0	0	0	0	0
COMT_HUMAN	P21964	COMT	COMT	0.000225133	8.40811e-05	7.37309e-05	0.000178292	0	0	7.68458e-05
COPB_HUMAN	P53618	COPB1 COPB MSTP026	COPB1	0.000247087	2.35741e-05	2.06722e-05	6.04951e-05	8.44225e-05	0.000114299	4.30911e-05
COR1A_HUMAN	P31146	CORO1A CORO1	CORO1A	0	0	0	0	2.95203e-05	0	0
COR1B_HUMAN	Q9BR76	CORO1B	CORO1B	0.000152556	0.000303626	0.00017587	0.0001082	0.000181222	7.54941e-05	0.000234807
COR1C_HUMAN	Q9ULV4	CORO1C CRN2 CRNN4	CORO1C	0.00165484	0.00397402	0.00165929	0.00454339	0.000795376	0.000507681	0.00254461
COTL1_HUMAN	Q14019	COTL1 CLP	COTL1	0.000807959	0	0	0.0010114	0	0.000356963	0
CBPD_HUMAN	O75976	CPD	CPD	0.000109603	0	0.000187942	0.000232689	0	0.000163959	1.50678e-05
CBPM_HUMAN	P14384	CPM	CPM	5.76769e-05	0	0	0.000204912	5.90405e-05	0.00162383	0
CPNE1_HUMAN	Q99829	CPNE1 CPN1	CPNE1	0.000164581	4.27531e-05	0.000149961	5.48557e-05	7.65526e-05	0.000100224	0
CPNE2_HUMAN	Q96FN4	CPNE2	CPNE2	0	0	0	5.30572e-05	3.70213e-05	4.68149e-05	0
CPNE3_HUMAN	O75131	CPNE3 CPN3 KIAA0636	CPNE3	0.000107925	6.30608e-05	0	0	0.000213284	0	0
CPPED_HUMAN	Q9BRF8	CPPED1 CSTP1	CPPED1	6.53343e-05	0.000350338	0	0.000177914	8.36408e-05	0.000237976	9.60572e-05
CRIM1_HUMAN	Q9NZV1	CRIM1 S52 UNQ1886/PRO4330	CRIM1	0	0.000221266	1.94029e-05	0	0	0.000300601	0
CRK_HUMAN	P46108	CRK	CRK	0.000120757	0	0	0.000237977	0.000177122	0	6.78051e-05
CRKL_HUMAN	P46109	CRKL	CRKL	0.000181917	0.000111284	0.00039034	0.000142786	0.000309963	0.000275865	0.000339025
CROCC_HUMAN	Q5TZA2	CROCC KIAA0445	CROCC	0	0	1.93181e-05	2.82663e-05	0	2.13714e-05	2.51678e-05
CSDE1_HUMAN	O75534	CSDE1 D1S155E KIAA0885 NRU UNR	CSDE1	0.000128742	5.66839e-05	9.94125e-05	0.000163643	0.000101497	0.000114514	2.59031e-05
CSF1_HUMAN	P09603	CSF1	CSF1	0	0	0	0.000176023	0	0	0
CSK_HUMAN	P41240	CSK	CSK	2.30013e-05	0	0	0	0	0	0
KC1D_HUMAN	P48730	CSNK1D HCKID	CSNK1D	0	5.36688e-05	0	0	9.60979e-05	0	0
KC1G3_HUMAN	Q9Y6M4	CSNK1G3	CSNK1G3	0	0	0	0	7.38007e-05	0	0
CSK21_HUMAN	P68400	CSNK2A1 CK2A1	CSNK2A1	0.000104469	0.000196189	0.000138763	0	0.000368019	0.000135889	7.68458e-05
CSK22_HUMAN	P19784	CSNK2A2 CK2A2	CSNK2A2	7.16724e-05	0.000153807	0	0	0.000165242	0.000149147	0
CSK2B_HUMAN	P67870	CSNK2B CK2N G5A	CSNK2B	9.40815e-05	0.000201795	0	0	0.000270996	0.000244601	0.000138322
CSPG4_HUMAN	Q6UVK1	CSPG4 MCSP	CSPG4	0.000481111	0.000688393	0.000351174	0.000158909	0.000101968	0.000351771	4.13314e-05
CYTC_HUMAN	P01034	CST3	CST3	0	0	0.000138245	0.000606841	0	0	0.000144086
CYTM_HUMAN	Q15828	CST6	CST6	0.000346756	0	0	0.000994014	0	0	0.000203415
CYTA_HUMAN	P01040	CSTA STF1 STFA	CSTA	0.0025179	0	0.00167363	0.00194501	0.000136867	0.00311532	0.0010479
CTNA1_HUMAN	P35221	CTNNA1	CTNNA1	0.00146329	0.00237109	0.00275167	0.00223501	0.00130981	0.00199813	0.000922149
CTNA2_HUMAN	P26232	CTNNA2 CAPR	CTNNA2	0.000353438	0.000408394	0.000789914	0.000885146	0.000207907	0.000539859	0.000186625
CTNB1_HUMAN	P35222	CTNNB1 CTNNB OK/SW-cl.35 PRO2286	CTNNB1	0.000966147	0.00178054	0.00145175	0.00154473	0.000814759	0.00123043	0.000718734
CTND1_HUMAN	O60716	CTNND1 KIAA0384	CTNND1	0.00016863	0.000432083	0.000169254	0.000290058	0.000355473	0.000169862	0.000160095
CATG_HUMAN	P08311	CTSG	CTSG	0.000365887	0	0	0	0	0	0
CATL1_HUMAN	P07711	CTSL CTSL1	CTSL	9.26105e-05	0	0	0.000170341	0	0	0
CATZ_HUMAN	Q9UBR2	CTSZ	CTSZ	9.5054e-05	0	0	0	0	0	0
SRC8_HUMAN	Q14247	CTTN EMS1	CTTN	0.000745102	0.000711977	0.000415488	0.00101931	0.000242828	0.000144689	0.000260284
CXAR_HUMAN	P78310	CXADR CAR	CXADR	0	0	0.000552982	0.000619192	0	0.000142785	5.76343e-05
NB5R1_HUMAN	Q9UHQ9	CYB5R1 NQO3A2 UNQ3049/PRO9865	CYB5R1	0.00017251	0	0.000130113	0	0	0	0
CYBR1_HUMAN	Q53TN4	CYBRD1 DCYTB FRRS3	CYBRD1	0	0	6.91227e-05	5.05701e-05	0	0.000178482	0
CP51A_HUMAN	Q16850	CYP51A1 CYP51	CYP51A1	6.17404e-05	0	7.76115e-05	8.51707e-05	0	0	0
CYTM1_HUMAN	Q9H1C7	CYSTM1 C5orf32 ORF1-FL49	CYSTM1	0	0	0.000201084	0.000294226	0	0	0
DAAM1_HUMAN	Q9Y4D1	DAAM1 KIAA0666	DAAM1	0	0	0	0	1.22401e-05	0	0
DAB2_HUMAN	P98082	DAB2 DOC2	DAB2	0.000183009	0.00021533	5.39494e-05	0.000355746	0	0	0
DAG1_HUMAN	Q14118	DAG1	DAG1	0.000270297	0.00106618	0.00135808	0.000581276	0.000349222	0.00222045	0.000297084
DAPK1_HUMAN	P53355	DAPK1 DAPK	DAPK1	0	0	0	0	0	0	2.16129e-05
DREB_HUMAN	Q16643	DBN1 D0S117E	DBN1	0.000758504	0.00163425	0.00115996	0.00150779	0.00106024	0.00100482	0.00214302
DBNL_HUMAN	Q9UJU6	DBNL CMAP SH3P7 PP5423	DBNL	0.000152989	0.000131377	0	0	0.000250922	0	9.60572e-05
DCBD2_HUMAN	Q96PD2	DCBLD2 CLCP1 ESDN	DCBLD2	0.000453781	0.00096446	0.000238005	0.000428565	2.65682e-05	0.0019822	0
PCD16_HUMAN	Q96JQ0	DCHS1 CDH19 CDH25 FIB1 KIAA1773 PCDH16	DCHS1	0	0	0	0	4.35125e-06	0	0
DCLK1_HUMAN	O15075	DCLK1 DCAMKL1 DCDC3A KIAA0369	DCLK1	0	0	0	0	4.59004e-05	0	0
DCTN3_HUMAN	O75935	DCTN3 DCTN22	DCTN3	0.000223441	0.000120116	0	0.000231178	0.00017923	0	0
DCNL3_HUMAN	Q8IWE4	DCUN1D3 SCCRO3	DCUN1D3	0.000242729	0.000111284	0	0.00018838	6.64206e-05	0.000251974	0
DCXR_HUMAN	Q7Z4W1	DCXR SDR20C1	DCXR	4.5118e-05	0	0	0.00018672	0.00011581	0.000156795	0
OST48_HUMAN	P39656	DDOST KIAA0115 OST48 OK/SW-cl.45	DDOST	0.000524379	0.000247297	0.000438767	0.000252507	0.000103321	0.000279772	9.04068e-05
DDR1_HUMAN	Q08345	DDR1 CAK EDDR1 NEP NTRK4 PTK3A RTK6 TRKE	DDR1	0	2.49746e-05	0	0	0	0	0
DDR2_HUMAN	Q16832	DDR2 NTRKR3 TKT TYRO10	DDR2	8.4989e-05	0.000156027	4.56067e-05	8.20111e-05	0	0.000206082	0
DDX50_HUMAN	Q9BQ39	DDX50	DDX50	3.53333e-05	0	0	0	5.44169e-05	0	0
DEN1A_HUMAN	Q8TEH3	DENND1A FAM31A KIAA1608	DENND1A	1.05682e-05	0	0	0	0	0	0
DESM_HUMAN	P17661	DES	DES	0.00185579	0.00516164	0.00398495	0.00169997	0.00368019	0.00101926	0.00443998
DFFA_HUMAN	O00273	DFFA DFF1 DFF45 H13	DFFA	7.92613e-05	0.000170435	0.000179345	0.000174945	6.10352e-05	0	0
DHRS3_HUMAN	O75911	DHRS3 RDH17 SDR16C1 UNQ2424/PRO4983	DHRS3	5.17529e-05	0	0	0	0	0	0
DBLOH_HUMAN	Q9NR28	DIABLO SMAC	DIABLO	0.000195948	0	0.000491539	0	0.000139401	0.000150988	0.000128076
DIAP1_HUMAN	O60610	DIAPH1 DIAP1	DIAPH1	2.70806e-05	0	0	0	1.60163e-05	2.89126e-05	0
DI3L1_HUMAN	Q8TF46	DIS3L DIS3L1 KIAA1955	DIS3L	9.69477e-06	0	0	0	0	0	0
DISP2_HUMAN	A7MBM2	DISP2 C15orf36 DISPB KIAA1742 LINC00594	DISP2	0	0	0	0	0	9.39377e-05	0
DKK1_HUMAN	O94907	DKK1 UNQ492/PRO1008	DKK1	0	0	0	0	0	0.000295418	0
DLG1_HUMAN	Q12959	DLG1	DLG1	4.11754e-05	0.000100897	0.000186709	0.000108765	0.000338745	0.000101917	5.76343e-05
DLG2_HUMAN	Q15700	DLG2	DLG2	0	0	0	0	5.37691e-05	0	0
DLGP4_HUMAN	Q9Y2H0	DLGAP4 DAP4 KIAA0964 SAPAP4	DLGAP4	0	2.33559e-05	4.09616e-05	0	1.39401e-05	5.28834e-05	0
DMBT1_HUMAN	Q9UGM3	DMBT1 GP340	DMBT1	1.35514e-05	0	0	0	0	0	1.76657e-05
DMD_HUMAN	P11532	DMD	DMD	5.49446e-06	4.13514e-05	0	0	8.8146e-06	0	0
DNJA3_HUMAN	Q96EY1	DNAJA3 HCA57 TID1	DNAJA3	6.78472e-05	4.85083e-05	0	0	4.34289e-05	0	8.86682e-05
DNJB4_HUMAN	Q9UDY4	DNAJB4 DNAJW HLJ1	DNAJB4	0.000178125	0.000265519	0.00010955	0.000111173	5.9429e-05	0.000160922	0.000151669
DNJC1_HUMAN	Q96KC8	DNAJC1 HTJ1	DNAJC1	5.9662e-05	0	0	0.000227566	0	0	0
DJC13_HUMAN	O75165	DNAJC13 KIAA0678 RME8	DNAJC13	6.36537e-05	0	0	1.27421e-05	0	0	0
DNJC5_HUMAN	Q9H3Z4	DNAJC5 CLN4	DNAJC5	5.33212e-05	0	0.000603253	0.000514896	0	0.000519219	0
DNJC9_HUMAN	Q8WXX5	DNAJC9	DNAJC9	0.000117897	0.000168162	0.000663578	0.000431532	0.000326199	0.000339723	0.000192114
DNER_HUMAN	Q8NFT8	DNER BET UNQ262/PRO299	DNER	0	0	0	0	0	0.000183058	0
DYN1_HUMAN	Q05193	DNM1 DNM	DNM1	0	0	0	0	1.5521e-05	0	0
DNM1L_HUMAN	O00429	DNM1L DLP1 DRP1	DNM1L	0.000114554	0	2.69747e-05	0.000118408	3.67203e-05	0	0
DYN2_HUMAN	P50570	DNM2 DYN2	DNM2	0.000125686	0	2.25707e-05	3.30254e-05	0	0	0
DOCK5_HUMAN	Q9H7D0	DOCK5	DOCK5	5.45612e-06	0	0	0	0	0	0
DPP3_HUMAN	Q9NY33	DPP3	DPP3	9.89333e-05	0	0	0	9.97643e-05	0	0
DPP4_HUMAN	P27487	DPP4 ADCP2 CD26	DPP4	0.000284409	0.000257976	0	0.00239247	0	0	0
DPYL2_HUMAN	Q16555	DPYSL2 CRMP2 ULIP2	DPYSL2	0.0005592	0.000122053	0.000137444	0.000678618	0.000594929	0.000440741	0.00065071
DSC1_HUMAN	Q08554	DSC1 CDHF1	DSC1	0.000276881	0.00017657	0.000148311	0.00021821	0.000105387	0.000413976	0.000610924
DSC3_HUMAN	Q14574	DSC3 CDHF3 DSC4	DSC3	0.000106107	0	2.21193e-05	4.85473e-05	0	5.71141e-05	0.000161376
DSG1_HUMAN	Q02413	DSG1 CDHF4	DSG1	0.000759659	0.000276583	0.000628277	0.000698633	0.000310351	0.00101975	0.00122347
DSG2_HUMAN	Q14126	DSG2 CDHF5	DSG2	2.89911e-05	0	1.81306e-05	0.000228985	0	0.000655408	0
DESP_HUMAN	P15924	DSP	DSP	0.000677122	0.000148155	0.000476139	0.000645637	0.000115636	0.00103636	0.000760357
DYST_HUMAN	Q03001	DST BP230 BP240 BPAG1 DMH DT KIAA0728	DST	4.08734e-06	2.92965e-06	0	4.90657e-06	0	0	0
DUS3_HUMAN	P51452	DUSP3 VHR	DUSP3	8.798e-05	0	0.000221193	0.000323649	7.52767e-05	0.000203834	0.000230537
DC1L1_HUMAN	Q9Y6G9	DYNC1LI1 DNCLI1	DYNC1LI1	9.26105e-05	0	0	0	7.92386e-05	0	0
DYHC2_HUMAN	Q8NCM8	DYNC2H1 DHC1B DHC2 DNCH2 DYH1B KIAA1997	DYNC2H1	0	5.1165e-06	0	0	0	0	0
DYL1_HUMAN	P63167	DYNLL1 DLC1 DNCL1 DNCLC1 HDLC1	DYNLL1	0.000586533	0.000882851	0.00104072	0	0	0.000611502	0.000806881
DYL2_HUMAN	Q96FJ2	DYNLL2 DLC2	DYNLL2	0.00035192	0.000630608	0.000422813	0.000503368	0.00045166	0.000571141	0.00115269
DYSF_HUMAN	O75923	DYSF FER1L1	DYSF	0	1.59648e-05	1.86661e-05	6.82803e-06	0	1.20494e-05	0
ECE1_HUMAN	P42892	ECE1	ECE1	8.0969e-05	0	0.000330518	0.000215963	0	0.000248501	9.27449e-05
EDNRA_HUMAN	P25101	EDNRA ETA ETRA	EDNRA	0	0	0	0	0	0.000116559	0
EEA1_HUMAN	Q15075	EEA1 ZFYVE2	EEA1	0.00026483	0.000108994	0.000128906	0.000279541	8.82875e-05	8.81391e-05	0
EF1A1_HUMAN	P68104	EEF1A1 EEF1A EF1A LENG7	EEF1A1	0.00192914	0.0018666	0.00233787	0.0015888	0.00236369	0.00250353	0.00260507
EF2_HUMAN	P13639	EEF2 EF2	EEF2	0.0012444	0.00069035	0.00113186	0.00115681	0.00202058	0.00138202	0.00140749
EFNA5_HUMAN	P52803	EFNA5 EPLG7 LERK7	EFNA5	0	0	0.000170148	6.22401e-05	0.000202668	0.00021967	0.000133002
EFNB1_HUMAN	P98172	EFNB1 EFL3 EPLG2 LERK2	EFNB1	0.0003101	0.000199139	0.000232834	0.000189843	5.9429e-05	0.000128791	0
EFNB2_HUMAN	P52799	EFNB2 EPLG5 HTKL LERK5	EFNB2	0.000127456	0.000374956	0.000298909	8.74726e-05	0	0	0
EFR3A_HUMAN	Q14156	EFR3A KIAA0143	EFR3A	3.80313e-05	0	0	0	0	0	0
EGFR_HUMAN	P00533	EGFR ERBB ERBB1 HER1	EGFR	0.000687926	0.000677668	0.000321351	0.000154962	0.000129206	0.00125123	5.16128e-05
EHBP1_HUMAN	Q8NDI1	EHBP1 KIAA0903 NACSIN	EHBP1	1.67581e-05	0	0	0	0	0	0
EHD1_HUMAN	Q9H4M9	EHD1 PAST PAST1 CDABP0131	EHD1	0.000240383	4.13514e-05	0	0	0	0	0
EHD2_HUMAN	Q9NZN4	EHD2 PAST2	EHD2	0.000577644	0.000206757	0	0	0	0	0
EHD4_HUMAN	Q9H223	EHD4 HCA10 HCA11 PAST4 FKSG7	EHD4	9.6153e-05	0	0	7.95858e-05	0	0	0
EI2BA_HUMAN	Q14232	EIF2B1 EIF2BA	EIF2B1	6.90039e-05	0	0.000130113	0.000142786	0.000199262	8.39914e-05	6.78051e-05
IF5_HUMAN	P55010	EIF5	EIF5	0.000120002	5.14782e-05	0.000270848	0.000165127	0.000168988	0.000249593	0.00016467
EMB_HUMAN	Q6PCB8	EMB	EMB	0	0	0.000168766	0.000306154	0	0.00108054	0
EMIL1_HUMAN	Q9Y6C2	EMILIN1 EMI	EMILIN1	0	0	4.13444e-05	0	0.000436183	0	0
EMP3_HUMAN	P54852	EMP3 YMP	EMP3	0.000261993	0	0	8.99024e-05	0	0.000475951	0
ENAH_HUMAN	Q8N8S7	ENAH MENA	ENAH	0.000100806	5.64724e-05	0.000264111	0.000140215	0.000303354	0.000121692	0.000189247
EGLN_HUMAN	P17813	ENG END	ENG	0.00116529	0.0017586	0.000965683	0.00116566	0	0.00180981	0.00012988
ENOA_HUMAN	P06733	ENO1 ENO1L1 MBPB1 MPB1	ENO1	0.00282732	0.00206625	0.00299638	0.00282299	0.00262668	0.00336571	0.00235442
ENOG_HUMAN	P09104	ENO2	ENO2	0.000563082	0	0.000429046	0.000500156	0	0.000641947	0
ENOB_HUMAN	P13929	ENO3	ENO3	0.000474218	0	0.000517685	0.000413169	0.000832848	0.000243039	0.000613131
ENPP1_HUMAN	P22413	ENPP1 M6S1 NPPS PC1 PDNP1	ENPP1	8.41559e-05	0.00122518	0.000231726	0	0	0.000250492	2.19559e-05
ENPP4_HUMAN	Q9Y6X5	ENPP4 KIAA0879 NPP4	ENPP4	0	0	0	0	0	0	0
EPB41_HUMAN	P11171	EPB41 E41P	EPB41	3.02337e-05	0	4.56067e-05	0	6.98444e-05	0	0
E41L1_HUMAN	Q9H4G0	EPB41L1 KIAA0338	EPB41L1	5.95439e-05	0	0	0	0	0	0
E41L2_HUMAN	O43491	EPB41L2	EPB41L2	0.000301993	0.000178579	0.000281522	7.31873e-05	0.000266466	0.00045096	0.000122409
E41L3_HUMAN	Q9Y2J2	EPB41L3 DAL1 KIAA0987	EPB41L3	0.000325604	0	3.4404e-05	0	0.000479033	0	0
EPCAM_HUMAN	P16422	EPCAM GA733-2 M1S2 M4S1 MIC18 TACSTD1 TROP1	EPCAM	0	0	0.000189594	0	0	0	0
EPHA2_HUMAN	P29317	EPHA2 ECK	EPHA2	0.000117174	0.000665642	0.000392127	0.000260721	0.000104551	0.000421058	0.000149422
EPHA3_HUMAN	P29320	EPHA3 ETK ETK1 HEK TYRO4	EPHA3	3.21537e-05	4.58624e-05	0	0	5.47467e-05	0	3.14369e-05
EPHA4_HUMAN	P54764	EPHA4 HEK8 SEK TYRO1	EPHA4	0	0	6.03253e-05	5.76076e-05	0	0.000129805	0.000167664
EPHA5_HUMAN	P54756	EPHA5 BSK EHK1 HEK7 TYRO4	EPHA5	0	4.38684e-05	0.000115405	0	0	7.44967e-05	0
EPHA7_HUMAN	Q15375	EPHA7 EHK3 HEK11	EPHA7	0.000157898	0	0.00029624	5.77944e-05	3.36057e-05	0.000331421	0.000319047
EPHB1_HUMAN	P54762	EPHB1 ELK EPHT2 HEK6 NET	EPHB1	4.28716e-05	0	0	0	0	0	0
EPHB2_HUMAN	P29323	EPHB2 DRT EPHT3 EPTH3 ERK HEK5 TYRO5	EPHB2	0.000105603	0.000377287	0.000340296	0.000224357	2.57356e-05	0.00057177	0
EPHB3_HUMAN	P54753	EPHB3 ETK2 HEK2 TYRO6	EPHB3	0	0.000114656	0.00017801	5.88452e-05	0	0.000337493	0
EPHB4_HUMAN	P54760	EPHB4 HTK MYK1 TYRO11	EPHB4	4.36382e-05	9.34234e-05	0.000163846	0	0	0.000370184	3.20191e-05
EPN1_HUMAN	Q9Y6I3	EPN1	EPN1	0.000161985	0.000168162	0.000294924	0.000140819	3.76383e-05	0	0
EPN3_HUMAN	Q9H201	EPN3	EPN3	0	0	0.00019517	0	0	0	0
EPIPL_HUMAN	P58107	EPPK1 EPIPL	EPPK1	1.69636e-05	0	7.95657e-06	1.1642e-05	0	0	0
SYEP_HUMAN	P07814	EPRS1 EPRS GLNS PARS QARS QPRS PIG32	EPRS1	0.000295465	2.21266e-05	4.37473e-05	6.62439e-05	0.000167282	0.000166882	5.39269e-05
EPS15_HUMAN	P42566	EPS15 AF1P	EPS15	4.14721e-05	5.09582e-05	8.93708e-05	9.80754e-05	0	0	0
EP15R_HUMAN	Q9UBC2	EPS15L1 EPS15R	EPS15L1	7.48766e-05	0.000107338	0.000235311	0	6.40653e-05	0.000121519	0
EPS8_HUMAN	Q12929	EPS8	EPS8	6.37536e-05	0	0	0	0	0	0
ERBB2_HUMAN	P04626	ERBB2 HER2 MLN19 NEU NGL	ERBB2	4.26735e-05	0.000100532	1.60285e-05	1.17264e-05	0	6.20806e-05	0
ERBB3_HUMAN	P21860	ERBB3 HER3	ERBB3	0	0	2.98909e-05	0	0	0	0
ERBB4_HUMAN	Q15303	ERBB4 HER4	ERBB4	0	0	1.50471e-05	0	0	9.71329e-05	0
ERBIN_HUMAN	Q96RT1	ERBIN ERBB2IP KIAA1225 LAP2	ERBIN	6.68203e-05	0	0	0	0	0	0
RB6I2_HUMAN	Q8IUD2	ERC1 ELKS KIAA1081 RAB6IP2	ERC1	2.74938e-05	0	3.45614e-05	2.52851e-05	4.11669e-05	2.23102e-05	0
EREG_HUMAN	O14944	EREG	EREG	0	0.00013276	0	0	0	0	0
ERLN2_HUMAN	O94905	ERLIN2 C8orf2 SPFH2 UNQ2441/PRO5003/PRO9924	ERLIN2	0.000363268	0	0.000251637	0.00055361	5.9429e-05	0.000214562	0
ESYT1_HUMAN	Q9BSJ8	ESYT1 FAM62A KIAA0747 MBC2	ESYT1	0.000377748	0.000246091	0.000175588	0.000137036	0.000134641	9.44679e-05	7.49715e-05
ESYT2_HUMAN	A0FGR8	ESYT2 FAM62B KIAA1228	ESYT2	0.000103795	3.70946e-05	6.50567e-05	6.34605e-05	1.47601e-05	0	0
EVA1A_HUMAN	Q9H8M9	EVA1A FAM176A TMEM166 SP24	EVA1A	0.000138702	0	0	0	0	0	0
EVI2B_HUMAN	P34910	EVI2B EVDB	EVI2B	0	0	0	6.60508e-05	0	0	0
EWS_HUMAN	Q01844	EWSR1 EWS	EWSR1	0.000316133	0.000296757	0.000128194	9.05572e-05	0.000210332	7.19713e-05	0.000355977
EXOC1_HUMAN	Q9NV70	EXOC1 SEC3 SEC3L1 BM-012	EXOC1	2.30013e-05	0	0	0	0	0	0
EXOC3_HUMAN	O60645	EXOC3 SEC6 SEC6L1	EXOC3	3.41008e-05	0	0	0	0	0	0
EXOC4_HUMAN	Q96A65	EXOC4 KIAA1699 SEC8 SEC8L1	EXOC4	2.64204e-05	0	0	2.91575e-05	0	0	0
EXOC6_HUMAN	Q8TAG9	EXOC6 SEC15A SEC15L SEC15L1	EXOC6	3.11986e-05	0	0	0	0	0	0
EXOC7_HUMAN	Q9UPT5	EXOC7 EXO70 KIAA1067	EXOC7	6.36e-05	0	0	0	0	0	0
EXOC8_HUMAN	Q8IYI6	EXOC8	EXOC8	5.72228e-05	0	0	0	0	0	0
EZRI_HUMAN	P15311	EZR VIL2	EZR	0.000536899	0.00036557	0.000462889	0.00156962	0.00032729	0.000856988	0.000517874
JAM1_HUMAN	Q9Y624	F11R JAM1 JCAM UNQ264/PRO301	F11R	0.000142905	0	0	0.00115215	0	0.000346146	0
THRB_HUMAN	P00734	F2	F2	1.67581e-05	0	0	0	0	0	0
TF_HUMAN	P13726	F3	F3	0	0	0	0.000418118	0	0	0
FA5_HUMAN	P12259	F5	F5	4.21061e-05	0	3.40744e-05	1.89947e-05	0	3.39965e-05	0
FABP5_HUMAN	Q01469	FABP5	FABP5	0.000785193	0	0.00130106	0.00140533	0.000602214	0.00380761	0.000614766
FAF1_HUMAN	Q9UNN5	FAF1 UBXD12 UBXN3A CGI-03	FAF1	0	0	0	0	4.06901e-05	0	0
F120A_HUMAN	Q9NZB2	FAM120A C9orf10 KIAA0183 OSSA	FAM120A	0.000129807	0	0	0	4.31915e-05	3.34154e-05	0
HYCCI_HUMAN	Q9BYI3	FAM126A DRCTNNB1A	FAM126A	0	0	0	0	5.1915e-05	0	0
F1711_HUMAN	Q5VUB5	FAM171A1 APCN C10orf38	FAM171A1	9.62424e-05	5.14782e-05	9.02827e-05	0.000107769	1.53626e-05	0	0
SEPR_HUMAN	Q12884	FAP	FAP	0.000394921	0.000487288	0	0.00163734	0	0	0
FARP1_HUMAN	Q9Y4F1	FARP1 CDEP PLEKHC2	FARP1	3.94804e-05	0	3.49823e-05	0	0.000272008	0	0
TNR6_HUMAN	P25445	FAS APT1 FAS1 TNFRSF6	FAS	0.000566022	0.000730178	0.000232834	0.000554736	5.9429e-05	0	0
FAS_HUMAN	P49327	FASN FAS	FASN	0.000166993	9.70166e-05	0.000164413	4.51127e-05	0.000193017	0.000545051	0.000223782
FAT1_HUMAN	Q14517	FAT1 CDHF7 FAT	FAT1	2.09698e-05	0	0	0	3.12413e-05	0	0
FAT2_HUMAN	Q9NYQ8	FAT2 CDHF8 KIAA0811 MEGF1	FAT2	3.67349e-06	0	0	0	0	0	0
FCG2C_HUMAN	P31995	FCGR2C CD32 FCG2 IGFR2	FCGR2C	0	0	0	0	0	0	6.40381e-05
FCGRN_HUMAN	P55899	FCGRT FCRN	FCGRT	5.89485e-05	0	0	8.09122e-05	0	0.000214178	0
FCHO2_HUMAN	Q0JRZ9	FCHO2	FCHO2	5.29874e-05	4.25129e-05	0	4.74669e-05	0	0	0
FERM2_HUMAN	Q96AC1	FERMT2 KIND2 MIG2 PLEKHC1	FERMT2	0.000162089	0.000161694	0	0.000414934	0.000135112	0	0.00014778
FIBA_HUMAN	P02671	FGA	FGA	8.6654e-05	0.000146036	0	0.000355752	0	0	6.06677e-05
FIBB_HUMAN	P02675	FGB	FGB	6.31591e-05	0	0	0.000339473	0	0	6.17511e-05
FGFR1_HUMAN	P11362	FGFR1 BFGFR CEK FGFBR FLG FLT2 HBGFR	FGFR1	0	0	0	0	5.72757e-05	0	0
FGFR4_HUMAN	P22455	FGFR4 JTK2 TKF	FGFR4	0	5.7328e-05	0.000427304	1.83891e-05	4.27708e-05	0.000115815	0
FIBG_HUMAN	P02679	FGG PRO2061	FGG	6.78472e-05	0	0	0.000406208	0	0	4.43341e-05
FHL1_HUMAN	Q13642	FHL1 SLIM1	FHL1	9.77556e-05	7.00676e-05	0.000122885	0	4.18204e-05	0	0
FLIP1_HUMAN	Q7Z7B0	FILIP1 KIAA1275	FILIP1	0	0	0	0	1.09097e-05	0	0
FKB1A_HUMAN	P62942	FKBP1A FKBP1 FKBP12	FKBP1A	0.000293267	0	0.000184327	0.000404561	0.000188192	0.000237976	0
FKRP_HUMAN	Q9H9S5	FKRP	FKRP	3.19927e-05	0	0	0	0	0	0
FILA_HUMAN	P20930	FLG	FLG	4.80972e-05	5.7987e-06	3.55942e-05	1.60161e-05	5.1915e-06	5.25187e-05	5.29971e-05
FILA2_HUMAN	Q5D862	FLG2 IFPS	FLG2	0.000207882	6.61121e-05	0.00012984	9.97679e-05	5.46363e-05	0.000191604	0.000227749
FLNA_HUMAN	P21333	FLNA FLN FLN1	FLNA	0.000670558	0.000623876	0.00023658	0.000670522	0.000605428	0.000241569	0.000631722
FLNB_HUMAN	O75369	FLNB FLN1L FLN3 TABP TAP	FLNB	0.000483286	0.000254058	0.000113951	0.000641726	0.00029515	0.000107786	0.000194879
FLNC_HUMAN	Q14315	FLNC ABPL FLN2	FLNC	0.000639594	0.000524423	0.000458042	0.000682777	0.00188321	0.000466535	0.00177458
FLOT1_HUMAN	O75955	FLOT1	FLOT1	0.000386862	0.000295178	0	0.000206584	9.60979e-05	0.000130107	0
FLOT2_HUMAN	Q14254	FLOT2 ESA1 M17S1	FLOT2	0.000274799	0.000456185	0	0.000241015	9.60979e-05	0.000260214	0
FLRT2_HUMAN	O43155	FLRT2 KIAA0405 UNQ232/PRO265	FLRT2	6.37281e-05	0	2.98909e-05	0	3.05176e-05	0.000308725	0
FLRT3_HUMAN	Q9NZU0	FLRT3 KIAA1469 UNQ856/PRO1865	FLRT3	9.28034e-05	0	0.000121201	0	0.000175302	0	0
FMN1_HUMAN	Q68DA7	FMN1 FMN LD	FMN1	0	0	0	3.07261e-05	0	0	0
FMN2_HUMAN	Q9NZ56	FMN2	FMN2	9.77556e-06	0	0	0	0	0	0
FMNL3_HUMAN	Q8IVF7	FMNL3 FHOD3 FRL2 KIAA2014 WBP3	FMNL3	0	0	0	0	2.57356e-05	0	0
FMR1_HUMAN	Q06787	FMR1	FMR1	3.30441e-05	0	0.000280385	2.27922e-05	0.000657346	0.000258381	0.000405876
FINC_HUMAN	P02751	FN1 FN	FN1	0.00074099	0.000911145	0.000268352	0.000829438	0.00165151	0.000158173	0.00147702
FOLR1_HUMAN	P15328	FOLR1 FOLR	FOLR1	0	0.000294284	0	0	0	0	0
FOSL1_HUMAN	P15407	FOSL1 FRA1	FOSL1	0	8.69804e-05	0	0	0	0	0
FRMD8_HUMAN	Q9BZ67	FRMD8 FKSG44	FRMD8	2.30013e-05	0	0	0	0	0	0
FSCN1_HUMAN	Q16658	FSCN1 FAN1 HSN SNL	FSCN1	0.0005345	0.000206381	0.000644599	0.000433135	0.00229936	0.00102321	0.00125748
FXYD6_HUMAN	Q9H0Q3	FXYD6 UNQ521/PRO1056	FXYD6	0	0.000229312	0.0038206	0	0	0.000964133	0
FYN_HUMAN	P06241	FYN	FYN	0	0	0	0	0.000172766	0	0
FZD1_HUMAN	Q9UP38	FZD1	FZD1	0.000132842	0	0	0	0	0	0
FZD2_HUMAN	Q14332	FZD2	FZD2	0	5.91195e-05	0.000100626	0	0	0.000535445	0
FZD7_HUMAN	O75084	FZD7	FZD7	0.000110528	0	6.50451e-05	0	3.52859e-05	0.000758547	0
G6PD_HUMAN	P11413	G6PD	G6PD	0.000443086	0.000106883	0	0.00038399	2.55175e-05	6.90963e-05	0
LYAG_HUMAN	P10253	GAA	GAA	0.000100689	0	6.31979e-05	0.000107883	5.73537e-05	5.43944e-05	6.58678e-05
NEUM_HUMAN	P17677	GAP43	GAP43	0.000117307	0	0	0	0	0	0
G3P_HUMAN	P04406	GAPDH GAPD CDABP0047 OK/SW-cl.12	GAPDH	0.0045479	0.00252243	0.0036969	0.00466883	0.00353382	0.00551084	0.00300979
GAS1_HUMAN	P54826	GAS1	GAS1	0	0.000175169	0.00121979	4.49512e-05	0.000480934	0.000555135	0.000288172
GBP1_HUMAN	P32455	GBP1	GBP1	2.58765e-05	0	6.50567e-05	9.51908e-05	0	8.39914e-05	0
GCC1_HUMAN	Q96CN9	GCC1	GCC1	3.33258e-05	0	0	0	0	0	0
GDE1_HUMAN	Q9NZC3	GDE1 MIR16	GDE1	3.08702e-05	0	0	0	0	0	0
GFRA1_HUMAN	P56159	GFRA1 GDNFRA RETL1 TRNR1	GFRA1	0	0.000197838	0.000216856	0	0.000103321	0.000279971	0
GGT1_HUMAN	P19440	GGT1 GGT	GGT1	0.000212601	0	0.000290089	0	0	4.68149e-05	0
GGT5_HUMAN	P36269	GGT5 GGTLA1	GGT5	0.000318393	0.00018308	0	0.000194657	0	0	0
GGT7_HUMAN	Q9UJ14	GGT7 GGTL3 GGTL5	GGT7	2.51371e-05	0	6.31979e-05	0	0	8.15916e-05	0
CXA1_HUMAN	P17302	GJA1 GJAL	GJA1	9.54822e-05	0	0	9.82455e-05	0	0	0
CXA9_HUMAN	P57773	GJA9 GJA10	GJA9	1.98825e-05	0	0	0	0	0	0
GSLG1_HUMAN	Q92896	GLG1 CFR1 ESL1 MG160	GLG1	0.000248238	0.000607252	0.000201908	0.000245546	0.00063567	0.000138954	0.000281768
GLIP1_HUMAN	P48060	GLIPR1 GLIPR RTVP1	GLIPR1	9.77556e-05	0.000294284	0	0	0	0	0
LGUL_HUMAN	Q04760	GLO1	GLO1	0.000209757	0	0.00010533	0.000462355	0.000752767	0.000776752	0.000439119
GLNA_HUMAN	P15104	GLUL GLNS	GLUL	4.18952e-05	0.000120116	5.26649e-05	3.85296e-05	0.000107538	0.000203979	8.23348e-05
SAP3_HUMAN	P17900	GM2A	GM2A	0.000251371	0	0.00010533	0.000462355	0	0	0.00016467
GNA11_HUMAN	P29992	GNA11 GA11	GNA11	0.000104949	0	0	0.000269707	7.16921e-05	0	0
GNA13_HUMAN	Q14344	GNA13	GNA13	0.000153768	0.00014332	0	0	0.000136867	0	0
GNAI1_HUMAN	P63096	GNAI1	GNAI1	0.000316295	0	0	0.000323649	0.000432841	0.000285571	0.000316989
GNAI2_HUMAN	P04899	GNAI2 GNAI2B	GNAI2	0.000588083	0.000536017	0.000260181	0.000612385	0.000432841	0.000331357	0
GNAI3_HUMAN	P08754	GNAI3	GNAI3	0.000380469	0.000430659	0.000215798	0.00053222	0.000495725	0.000457532	0.000309257
GNAQ_HUMAN	P50148	GNAQ GAQ	GNAQ	7.69485e-05	0	0	0.000385296	3.5846e-05	0	0
GNAS1_HUMAN	Q5JWF2	GNAS GNAS1	GNAS	0.000151075	0.00014771	0.000159418	0.000135046	0.000183105	0.000106544	0.000155768
GNAT2_HUMAN	P19087	GNAT2 GNATC	GNAT2	0.000235794	0	0	0	0	0	0
GBB1_HUMAN	P62873	GNB1	GNB1	0.000460912	0.000613565	0.000258438	0.000418492	0.000590006	0.000264543	0.00024923
GNB1L_HUMAN	Q9BYB4	GNB1L GY2 KIAA1645 WDR14 FKSG1	GNB1L	0	0	0	0	4.18204e-05	0	6.40381e-05
GBB2_HUMAN	P62879	GNB2	GNB2	0.000341781	0.000511304	0.000202183	0.000368079	0.000366211	0.000275589	0.000218076
GBG12_HUMAN	Q9UBI6	GNG12	GNG12	0.000697984	0.000945912	0.000536671	0.00132017	0	0.00104503	0.000432257
GBG2_HUMAN	P59768	GNG2	GNG2	0	0	0	0.00020228	0	0.000713927	0
GBG5_HUMAN	P63218	GNG5 GNGT5	GNG5	0.000167581	0.000360348	0.00126396	0.000231178	0.000967843	0.000407958	0
GOLM1_HUMAN	Q8NBJ4	GOLM1 C9orf155 GOLPH2 PSEC0242 UNQ686/PRO1326	GOLM1	7.18842e-05	0	0.00122885	0.000431532	6.69126e-05	0.000444221	0
GOLP3_HUMAN	Q9H4A6	GOLPH3 GPP34	GOLPH3	5.17529e-05	0.000222568	6.50567e-05	0.000285572	4.42804e-05	0	0
GOPC_HUMAN	Q9HD26	GOPC CAL FIG	GOPC	2.30013e-05	0	0	0	0	0	0
AATM_HUMAN	P00505	GOT2 KYAT4	GOT2	0.000710696	0.000236478	0.00124544	0.00163085	0.000470479	0.00129572	0.000360215
GPC1_HUMAN	P35052	GPC1	GPC1	0.00030879	0.0020749	0.00207328	0.000866972	0.00111701	0.00093397	0.000241692
GPC2_HUMAN	Q8N158	GPC2	GPC2	0	0	0	0	0.000143384	0	0
GPC3_HUMAN	P51654	GPC3 OCI5	GPC3	0	0	0	0	0.000798389	0	0
GPC4_HUMAN	O75487	GPC4 UNQ474/PRO937	GPC4	0.000285235	0.000122053	0.000443848	2.61007e-05	0.000412808	0.000131506	5.57752e-05
GPC5_HUMAN	P78333	GPC5	GPC5	0	0	9.75677e-05	0	0	0	0
GPC6_HUMAN	Q9Y625	GPC6 UNQ369/PRO705	GPC6	0.00015902	0.000260251	0.000226144	0.000301754	0.000119487	0.000110038	7.31865e-05
GPD1L_HUMAN	Q8N335	GPD1L KIAA0089	GPD1L	3.08702e-05	0	0	0	0	0	0
GEPH_HUMAN	Q9NQX3	GPHN GPH KIAA1385	GPHN	0	0	0.000110596	0	3.76383e-05	5.09585e-05	8.64515e-05
G6PI_HUMAN	P06744	GPI	GPI	0.000517973	0.00030029	0.000470828	0.000466956	0.000322614	0.000443274	0.000237856
GPNMB_HUMAN	Q14956	GPNMB HGFIN NMB UNQ1725/PRO9925	GPNMB	0	0	9.75677e-05	0	0	0	0
GP107_HUMAN	Q5VW38	GPR107 KIAA1624 LUSTR1	GPR107	1.75085e-05	0	0	0	0	0	0
GP176_HUMAN	Q14439	GPR176	GPR176	0	4.42532e-05	0	0	0	0	0
RAI3_HUMAN	Q8NFJ5	GPRC5A GPCR5A RAI3 RAIG1	GPRC5A	0.000102643	0	0	0.000160123	0	0	0
GRIN1_HUMAN	Q7Z2K8	GPRIN1 KIAA1893	GPRIN1	0	0	0	0	1.47601e-05	0	0
GPSM1_HUMAN	Q86YR5	GPSM1 AGS3	GPSM1	1.56409e-05	0	0	0	0	0	0
GRB2_HUMAN	P62993	GRB2 ASH	GRB2	0.000353219	0.000554935	0.000387708	0.000194189	0.000240885	0.000758628	0.00055329
NMDZ1_HUMAN	Q05586	GRIN1 NMDAR1	GRIN1	1.11721e-05	0	0	0	0	0	0
NMDE3_HUMAN	Q14957	GRIN2C NMDAR2C	GRIN2C	8.75423e-06	0	0	0	0	0	0
GRIP2_HUMAN	Q9C0E4	GRIP2 KIAA1719	GRIP2	0	0	0	0	0	0	2.04015e-05
GRN_HUMAN	P28799	GRN	GRN	0	0	6.91227e-05	2.52851e-05	0	0.000178482	3.60215e-05
GSDMA_HUMAN	Q96QA5	GSDMA GSDM GSDM1 FKSG9	GSDMA	0.00115491	7.72173e-05	0.000107528	0.000188944	0	0.000233119	0.000399912
GSDME_HUMAN	O60443	GSDME DFNA5 ICERE1	GSDME	3.19927e-05	0	0	0.000235381	0	0	0
GSK3B_HUMAN	P49841	GSK3B	GSK3B	2.49589e-05	0	0	0	3.20326e-05	0	0
GELS_HUMAN	P06396	GSN	GSN	0.000225408	0.000703935	0.000316913	8.3884e-05	0.000744014	0.000208681	0.000388697
GSHR_HUMAN	P00390	GSR GLUR GRD1	GSR	0.000189161	0.000225217	0.000268336	0.000268897	0.000282288	0.00130028	0.000226421
GSTP1_HUMAN	P09211	GSTP1 FAEES3 GST3	GSTP1	0.00124157	0.000493519	0.000687242	0.0011276	0.00098187	0.000655902	0.000601402
GLPC_HUMAN	P04921	GYPC GLPC GPC	GYPC	8.37905e-05	0.000270261	0.00110596	0.000346767	0	0.00244775	0
HBEGF_HUMAN	Q99075	HBEGF DTR DTS HEGFL	HBEGF	0	0.000219342	0.000288512	0	0	0	0
HDAC3_HUMAN	O15379	HDAC3	HDAC3	0	0	0	0	6.14504e-05	0	0
HDAC6_HUMAN	Q9UBN7	HDAC6 KIAA0901 JM21	HDAC6	0	0	0	0	1.72389e-05	0	0
VIGLN_HUMAN	Q00341	HDLBP HBP VGL	HDLBP	0.000370788	0.000268344	0.000105185	0.000210088	0.000144147	0.000216845	8.99259e-05
HEG1_HUMAN	Q9ULI3	HEG1 KIAA1237	HEG1	2.80506e-05	0	1.50471e-05	5.7477e-05	0	0.000174839	0
HEPH_HUMAN	Q9BQS7	HEPH KIAA0698 UNQ2562/PRO6242	HEPH	5.66472e-05	0	0	0	0	0	0
HFE_HUMAN	Q30201	HFE HLAH	HFE	0	9.45912e-05	0	0	0	0.000214178	0
HINT1_HUMAN	P49773	HINT1 HINT PKCI1 PRKCNH1	HINT1	0.000167581	0	0	0	0.000107538	0	0
HIP1_HUMAN	O00291	HIP1	HIP1	3.04143e-05	3.26177e-05	1.90683e-05	3.21597e-05	3.24468e-05	0	3.97478e-05
HXK2_HUMAN	P52789	HK2	HK2	0.000138239	0	0	0	1.47601e-05	3.99675e-05	0
1A01_HUMAN	P04439	HLA-A HLAA	HLA-A	0	0.00166111	0.00218298	0.00206076	0	0	0
HLAA_HUMAN	P04439	HLA-A HLAA	HLA-A	0.00189013	0.00113817	0	0.00154557	0	0	0
1B27_HUMAN	P01889	HLA-B HLAB	HLA-B	0	0	0	0.00184824	0	0	0
HLAB_HUMAN	P01889	HLA-B HLAB	HLA-B	0.00215162	0.00150731	0.00111687	0	0	0	0
HLAC_HUMAN	P10321	HLA-C HLAC	HLA-C	0.00152403	0.00129198	0	0.00180317	0	0	0
DRA_HUMAN	P01903	HLA-DRA HLA-DRA1	HLA-DRA	0.000528504	0	0	0	0	0	0
DRB1_HUMAN	P01911	HLA-DRB1	HLA-DRB1	0.000235794	0	0	0	0	0	0
HLAE_HUMAN	P13747	HLA-E HLA-6.2 HLAE	HLA-E	0	0	0	0.000283193	0	0.00157064	0
HLAF_HUMAN	P30511	HLA-F HLA-5.4 HLAF	HLA-F	0.00039299	0	0	0	0	0	0
HM13_HUMAN	Q8TCT9	HM13 H13 IMP1 PSL3 SPP MSTP086	HM13	0.000400559	0	0.000701343	0.00173665	0	6.96514e-05	0
HMGB1_HUMAN	P09429	HMGB1 HMG1	HMGB1	0.000387702	0.000353141	0.00065053	0.00122987	0.00207764	0.00179374	0.00202873
HMOX1_HUMAN	P09601	HMOX1 HO HO1	HMOX1	0.000240393	0.000114656	6.70281e-05	0.000196151	0	0	0
HMOX2_HUMAN	P30519	HMOX2 HO2	HMOX2	0.000162926	0.000105101	0.000184327	0.000539415	6.27306e-05	7.93252e-05	0
HNRPF_HUMAN	P52597	HNRNPF HNRPF	HNRNPF	0.00044144	0.000329013	0.000462416	0.000301434	0.000572757	0.000319177	0.000526227
HOME3_HUMAN	Q9NSC5	HOMER3	HOMER3	2.93267e-05	0	0	0	0.000150553	0	0
RASH_HUMAN	P01112	HRAS HRAS1	HRAS	0.000446883	0	0.00010533	0.000539415	0	0	0
HORN_HUMAN	Q86YZ3	HRNR S100A18	HRNR	0.000163859	0.0001297	0.000263205	0.00027397	0.000109445	0.000522146	0.000396492
HCD2_HUMAN	Q99714	HSD17B10 ERAB HADH2 MRPP2 SCHAD SDR5C1 XH98G2	HSD17B10	0.000511813	0.000653964	0.000831198	0.00107883	0.000390324	0.000385133	8.53842e-05
DHB8_HUMAN	Q92506	HSD17B8 FABGL HKE6 RING2 SDR30C1	HSD17B8	8.73311e-05	0.000140135	0	0	0	0	0
HS90A_HUMAN	P07900	HSP90AA1 HSP90A HSPC1 HSPCA	HSP90AA1	0.00142488	0.00115735	0.00147927	0.000851318	0.0024	0.0018538	0.00203415
HS90B_HUMAN	P08238	HSP90AB1 HSP90B HSPC2 HSPCB	HSP90AB1	0.0016331	0.00142837	0.00173987	0.00112201	0.00293851	0.00201397	0.00244425
H90B3_HUMAN	Q58FF7	HSP90AB3P HSP90BC	HSP90AB3P	0.00105761	0	0	0	0	0	0
H90B4_HUMAN	Q58FF6	HSP90AB4P	HSP90AB4P	0.000430958	0	0	0	0	0.000878595	0
ENPL_HUMAN	P14625	HSP90B1 GRP94 TRA1	HSP90B1	0.00192319	0.000959621	0.00162835	0.00206763	0.00134189	0.00102378	0.00130304
HSP13_HUMAN	P48723	HSPA13 STCH	HSPA13	6.76769e-05	0	0.000340296	0.000311201	0	0.00021967	0
HS71A_HUMAN	P0DMV8	HSPA1A HSP72 HSPA1 HSX70	HSPA1A	0.000920457	0.000972938	0.00127962	0.000958305	0.00067749	0.00110675	0.00133382
HS71L_HUMAN	P34931	HSPA1L	HSPA1L	0.000601042	0.00068466	0.00114954	0.000834074	0.000430153	0.00107777	0.000839815
HSP72_HUMAN	P54652	HSPA2	HSPA2	0.000882414	0.00120716	0.00162535	0.000994064	0	0.00161669	0.00144909
BIP_HUMAN	P11021	HSPA5 GRP78	HSPA5	0.00278954	0.00369606	0.00576782	0.00462328	0.00274969	0.00559942	0.00413046
HSP76_HUMAN	P17066	HSPA6 HSP70B'	HSPA6	0	0	0.000778848	0.00052422	0	0.000603318	0
HSP7C_HUMAN	P11142	HSPA8 HSC70 HSP73 HSPA10	HSPA8	0.00197195	0.00248691	0.00307938	0.00209979	0.00262938	0.00331106	0.00350677
HSPB1_HUMAN	P04792	HSPB1 HSP27 HSP28	HSPB1	0.000958871	0.000329013	0.000421422	0.00101132	0.00160372	0.00114377	0.000952219
CH60_HUMAN	P10809	HSPD1 HSP60	HSPD1	0.00287801	0.00235703	0.00647729	0.00366363	0.00356639	0.00457593	0.00328799
PGBM_HUMAN	P98160	HSPG2	HSPG2	8.75423e-06	3.22699e-05	9.43252e-06	3.15266e-05	2.88908e-05	3.47691e-05	2.70353e-05
HTRA2_HUMAN	O43464	HTRA2 OMI PRSS25	HTRA2	0.000102107	0.000128696	0.000268185	0.000307311	6.14504e-05	0.000274718	4.70484e-05
HYAL2_HUMAN	Q12891	HYAL2 LUCA2	HYAL2	0	0	0	0	0	0.00015865	0
ICAM1_HUMAN	P05362	ICAM1	ICAM1	0.000674832	8.69804e-05	0.000422824	0.00327194	0	0	0
ICAM2_HUMAN	P13598	ICAM2	ICAM2	7.60626e-05	0	0	0	0	0	0
ICAM5_HUMAN	Q9UMF0	ICAM5 TLCN TLN	ICAM5	0	0	0	0.000174209	0	2.94403e-05	0
ICOSL_HUMAN	O75144	ICOSLG B7H2 B7RP1 ICOSL KIAA0653	ICOSLG	0	0	0	4.90377e-05	0	0.00025961	0
IDE_HUMAN	P14735	IDE	IDE	2.48531e-05	0	0	2.74279e-05	3.82763e-05	0	0
IFM3_HUMAN	Q01628	IFITM3	IFITM3	0.000156409	0	0	0	0	0	0
INAR1_HUMAN	P17181	IFNAR1 IFNAR	IFNAR1	0	0	0.000103684	0	0	0.000223102	0
INGR1_HUMAN	P15260	IFNGR1	IFNGR1	8.73311e-05	7.00676e-05	0.00024577	0.000118609	0	0.000222839	0
IGDC4_HUMAN	Q8TDY8	IGDCC4 DDM36 KIAA1628 NOPE	IGDCC4	0	1.88241e-05	3.98067e-05	0	4.49413e-05	0.000745893	1.72043e-05
IGF1R_HUMAN	P08069	IGF1R	IGF1R	0	2.44106e-05	0.000114164	2.56616e-05	0	0.000203965	2.23101e-05
MPRI_HUMAN	P11717	IGF2R MPRI	IGF2R	0.000161054	0.000151898	0.00027208	0.000284205	0.000173081	0.000441307	0.000197724
IBP2_HUMAN	P18065	IGFBP2 BP2 IBP2	IGFBP2	0	0	6.31979e-05	9.24711e-05	0.000129046	0.000163183	0
IGHA1_HUMAN	P01876	IGHA1	IGHA1	0.000821633	0.000464659	0.000818272	0.00084746	0.000475432	0.00126095	0.00321539
IGHG1_HUMAN	P01857	IGHG1	IGHG1	0	0	0.00024577	0.000224756	0	0.000555276	0
IGHG2_HUMAN	P01859	IGHG2	IGHG2	0.000130341	0.00028027	0.000381253	0.000441949	0	0.000651277	0.000480286
IGHG3_HUMAN	P01860	IGHG3	IGHG3	0	0	0	0	0	0	0.000646629
IGHG4_HUMAN	P01861	IGHG4	IGHG4	0.000720482	0	0	0	0	0	0
IGHM_HUMAN	P01871	IGHM	IGHM	0	0	0	0	0	0	0.000141145
IGKC_HUMAN	P01834	IGKC	IGKC	0.00180848	0.00388875	0.000439071	0.00171906	0.000439114	0.00271779	0.00220932
KV228_HUMAN	A0A075B6P5	IGKV2-28	IGKV2-28	0.00018138	0	0	0	0	0	0
KV311_HUMAN	P04433	IGKV3-11	IGKV3-11	0.00018138	0	0	0	0	0	0.000354673
KV315_HUMAN	P01624	IGKV3-15	IGKV3-15	0.000196495	0	0	0	0	0	0
KV320_HUMAN	P01619	IGKV3-20	IGKV3-20	0.00027207	0	0	0.000324966	0	0	0.000266005
KVD20_HUMAN	A0A0C4DH25	IGKV3D-20	IGKV3D-20	0	0	0	0	0	0	0.000266005
IGLC2_HUMAN	P0DOY2	IGLC2	IGLC2	0.000479891	0.000802592	0.0012596	0.00106233	0	0.00113063	0.00146706
IGLC3_HUMAN	P0DOY3	IGLC3	IGLC3	0.000750253	0	0	0	0	0	0
IGLL5_HUMAN	B9A064	IGLL5	IGLL5	0.000230283	0	0	0	0	0	0
LV147_HUMAN	P01700	IGLV1-47	IGLV1-47	0.000294742	0	0	0	0	0	0
IGSF8_HUMAN	Q969P0	IGSF8 CD81P3 EWI2 KCT4	IGSF8	9.069e-05	0.000213437	0.000266215	0.000152129	2.31621e-05	0.00021967	0.000124135
TUTLB_HUMAN	Q9UPX0	IGSF9B KIAA1030	IGSF9B	0	1.71594e-05	0	0	0	0	0
I13R1_HUMAN	P78552	IL13RA1 IL13R IL13RA	IL13RA1	0	0	4.51414e-05	6.60508e-05	0	0.000233119	0
I13R2_HUMAN	Q14627	IL13RA2 IL13R	IL13RA2	0.000120442	0	0	0	0	0	0
I17RA_HUMAN	Q96F46	IL17RA IL17R	IL17RA	1.83292e-05	0	0	0	0	0	0
IL18R_HUMAN	Q13478	IL18R1 IL1RRP	IL18R1	2.84759e-05	0	0	5.22014e-05	0	0	0
IL1R1_HUMAN	P14778	IL1R1 IL1R IL1RA IL1RT1	IL1R1	0.00018138	0	0	0	0	0	0
IL1AP_HUMAN	Q9NPH3	IL1RAP C3orf13 IL1R3	IL1RAP	0.00018138	0	0.000136119	6.11929e-05	6.94862e-05	0.000351472	0
ILRL1_HUMAN	Q01638	IL1RL1 DER4 ST2 T1	IL1RL1	0	0	0	5.13728e-05	0	0	0
IL4RA_HUMAN	P24394	IL4R IL4RA 582J2.1	IL4R	0	0	0	0	0	9.51902e-05	2.56153e-05
IL6RB_HUMAN	P40189	IL6ST	IL6ST	0.000172722	0.000157652	4.25371e-05	0.000184102	0	0.000384422	0
ILK_HUMAN	Q13418	ILK ILK1 ILK2	ILK	0.000195511	0	0	6.34605e-05	2.95203e-05	0	0
INO80_HUMAN	Q9ULG1	INO80 INO80A INOC1 KIAA1259	INO80	0	0	0	0	8.50584e-06	0	0
SHIP2_HUMAN	O15357	INPPL1 SHIP2	INPPL1	8.43933e-06	0	0	0	0	0	0
INSR_HUMAN	P06213	INSR	INSR	0	0	8.50741e-05	0	1.44763e-05	3.66116e-05	0
IQGA1_HUMAN	P46940	IQGAP1 KIAA0051	IQGAP1	0.000285992	0.000180174	1.17033e-05	0.00014817	9.55894e-05	9.70638e-05	1.82966e-05
IQGA2_HUMAN	Q13576	IQGAP2	IQGAP2	1.94431e-05	2.09041e-05	0	0	0	0	0
IQGA3_HUMAN	Q86VI3	IQGAP3	IQGAP3	0	2.04522e-05	0	0	8.13802e-06	2.20361e-05	0
IRAG2_HUMAN	Q12912	IRAG2 JAW1 LRMP	IRAG2	0	0	0.000178381	0.000234906	0	0.000506658	0
ITCH_HUMAN	Q96J02	ITCH	ITCH	1.1389e-05	0	0	0	0	0	0
ITA1_HUMAN	P56199	ITGA1	ITGA1	9.44075e-05	0.00024069	0.000206081	0.000386329	0	0.000185255	0.00020238
ITA10_HUMAN	O75578	ITGA10 UNQ468/PRO827	ITGA10	0.00012895	7.8826e-05	0	0	0	0	0
ITA11_HUMAN	Q9UKX5	ITGA11 MSTP018	ITGA11	0.000141742	0.000113794	0	9.52908e-05	0	0	0
ITA2_HUMAN	P17301	ITGA2 CD49B	ITGA2	0.000597297	0.000215091	6.85869e-05	0.00150444	0	0	0
ITA3_HUMAN	P26006	ITGA3 MSK18	ITGA3	0.000123275	0.000830031	4.61482e-05	0.000960551	0	0.000610194	0
ITA4_HUMAN	P13612	ITGA4 CD49D	ITGA4	0.000315054	0.000921236	0.000660687	0.000218856	9.8187e-05	0.00219761	0.000471098
ITA5_HUMAN	P08648	ITGA5 FNRA	ITGA5	0.000704036	0.00129412	0.000438387	0.0018783	5.89122e-05	0.00181438	0.000451051
ITA6_HUMAN	P23229	ITGA6	ITGA6	9.69858e-05	0.00107253	0.000642854	3.82262e-05	2.96365e-05	0.000534734	5.44576e-05
ITA7_HUMAN	Q13683	ITGA7 UNQ406/PRO768	ITGA7	0.000155368	0.000879918	0.000411521	0	0	4.26708e-05	0.000196582
ITA8_HUMAN	P53708	ITGA8	ITGA8	0	0.000194033	0	0	0	0	0
ITA9_HUMAN	Q13797	ITGA9	ITGA9	6.2051e-05	0	7.30331e-05	0	0	0.00122745	0
ITAV_HUMAN	P06756	ITGAV MSK8 VNRA VTNR	ITGAV	0.00129241	0.00195706	0.00115246	0.00216013	0.000116809	0.00474539	0.000327919
ITB1_HUMAN	P05556	ITGB1 FNRB MDF2 MSK12	ITGB1	0.00180203	0.00455758	0.00201808	0.00545769	0.000496142	0.00424119	0.00137536
ITB3_HUMAN	P05106	ITGB3 GP3A	ITGB3	0.000308141	0.00057987	0.000448641	0.000581221	0	0.00115099	2.64985e-05
ITB5_HUMAN	P18084	ITGB5	ITGB5	0.000314369	0.000802592	0.000184068	0.000399146	0	0.000790353	6.54936e-05
ITB6_HUMAN	P18564	ITGB6	ITGB6	0	0.000117322	0	0	0	0	0
ITB8_HUMAN	P26012	ITGB8	ITGB8	0	0	0	0	0	0.000166029	0
ITIH4_HUMAN	Q14624	ITIH4 IHRP ITIHL1 PK120 PRO1851	ITIH4	0	0	0	0	0	5.93691e-05	0
ITM2B_HUMAN	Q9Y287	ITM2B BRI BRI2	ITM2B	0	0	0.000368655	0	0	9.51902e-05	0
ITM2C_HUMAN	Q9NQX7	ITM2C BRI3 hucep-14 NPD018 PSEC0047	ITM2C	3.91022e-05	0	0.000208144	0	0	9.51902e-05	0
IPRI_HUMAN	Q8IWB1	ITPRIP DANGER KIAA1754	ITPRIP	9.46022e-05	0	0	0.000104403	0	0	0
ITSN1_HUMAN	Q15811	ITSN1 ITSN SH3D1A	ITSN1	2.1055e-05	0	0	9.12855e-05	0	0	0
JAG1_HUMAN	P78504	JAG1 JAGL1	JAG1	4.39914e-05	0.000103533	0	0	0	0.000788516	0
JAM2_HUMAN	P57087	JAM2 C21orf43 VEJAM UNQ219/PRO245	JAM2	0	0.000649717	0.00120651	0	0	0.000407914	0
JAM3_HUMAN	Q9BX67	JAM3 UNQ859/PRO1868	JAM3	0.000395502	0.00144139	0.00274529	0.000581112	0.000258092	0.00448725	0.000823348
JCAD_HUMAN	Q9P266	JCAD KIAA1462	JCAD	4.75568e-05	0	0	0	0	0	0
JUPI2_HUMAN	Q9H910	JPT2 C16orf34 HN1L L11	JPT2	5.86533e-05	0.000126122	0.000221193	0.000485473	0.000150553	0.000428356	0.000115269
PLAK_HUMAN	P14923	JUP CTNNG DP3	JUP	0.00117482	0.000845938	0.00146046	0.00148293	0.000697686	0.00213144	0.00165874
SYK_HUMAN	Q15046	KARS1 KARS KIAA0070	KARS1	0.000155432	3.70946e-05	6.31378e-05	0.000214179	0.000254612	0.000119902	5.08538e-05
KCD12_HUMAN	Q96CX2	KCTD12 C13orf2 KIAA1778 PFET1	KCTD12	0.000416937	0.000105101	0	0.000259064	0.000731857	0	0
KCTD3_HUMAN	Q9Y597	KCTD3	KCTD3	0	0	0	0	0	0	0
VGFR2_HUMAN	P35968	KDR FLK1 VEGFR2	KDR	0	0	0	0.000170341	0	0	0
KHDR1_HUMAN	Q07666	KHDRBS1 SAM68	KHDRBS1	0.000232169	0.000183927	0.000332022	0.000168567	0.000219557	0.000254793	0.000408243
K319L_HUMAN	Q8IZA0	KIAA0319L AAVR KIAA1837 PP791	KIAA0319L	1.5169e-05	0	0.000133478	0.000111603	0	0.000172327	0
K1549_HUMAN	Q9HCM3	KIAA1549	KIAA1549	0	0	6.28984e-05	0	0	0	0
K1614_HUMAN	Q5VZ46	KIAA1614	KIAA1614	9.23675e-06	0	0	0	0	0	0
KI20A_HUMAN	O95235	KIF20A MKLP2 RAB6KIFL	KIF20A	0	0	2.21193e-05	4.85473e-05	0	0	0
KIRR1_HUMAN	Q96J84	KIRREL1 KIRREL NEPH1	KIRREL1	0.000147266	0.000225217	0.00021066	0.000213233	1.7923e-05	0.00115588	4.11674e-05
SCF_HUMAN	P21583	KITLG MGF SCF	KITLG	0.000114094	0.000203422	0.000356762	0	0	0.00101332	0
KLC2_HUMAN	Q9H0B6	KLC2	KLC2	5.10029e-05	0	0	0	0.000120006	0	0
KLH41_HUMAN	O60662	KLHL41 KBTBD10 KRP1	KLHL41	0	0.000148378	0.000397923	0	0.000686346	0	0.000169513
KLHL7_HUMAN	Q8IXQ5	KLHL7	KLHL7	0	0	0	0	0	0	3.49299e-05
KMT2E_HUMAN	Q8IZD2	KMT2E MLL5	KMT2E	5.72228e-06	0	0	2.06076e-05	0	0	0
KNG1_HUMAN	P01042	KNG1 BDK KNG	KNG1	0.000122194	0.000297787	5.78179e-05	0.000352047	0	0.000311413	0
IMA1_HUMAN	P52292	KPNA2 RCH1 SRP1	KPNA2	4.04506e-05	0	7.62733e-05	0	0.000142766	0.000175719	0.000119243
RASK_HUMAN	P01116	KRAS KRAS2 RASK2	KRAS	0.000321537	0	0	0	0.000273733	0	0
K1C19_HUMAN	P08727	KRT19	KRT19	0	0	0	0	0.000889634	0	0.00256735
K22E_HUMAN	P35908	KRT2 KRT2A KRT2E	KRT2	0	0	0	0	0.0170704	0	0.0326476
KTN1_HUMAN	Q86UP2	KTN1 CG1 KIAA0004	KTN1	0.00039911	0.000185949	0.000410335	0.000218988	0.000149588	0.000213039	0.000118224
L1CAM_HUMAN	P32004	L1CAM CAML1 MIC5	L1CAM	0	0.000396382	0.00052227	1.15589e-05	0.000172061	0.00196101	0.000263471
LAMP1_HUMAN	P11279	LAMP1	LAMP1	0.000333287	0.000336324	0.000429337	0.000588818	0.000217466	0.00048492	0
LAMP2_HUMAN	P13473	LAMP2	LAMP2	0.000170033	0	0.000313701	0.000376078	0	0.000163135	0
LTOR1_HUMAN	Q6IAA8	LAMTOR1 C11orf59 PDRO PP7157	LAMTOR1	0.00045734	0.00028027	0.000715562	0.00052191	0.000334563	0.000600404	0
LTOR2_HUMAN	Q9Y2Q5	LAMTOR2 MAPBPIP ROBLD3 HSPC003	LAMTOR2	0.000293267	0	0.00031599	0	0	0.000407958	0
LTOR3_HUMAN	Q9UHA4	LAMTOR3 MAP2K1IP1 MAPKSP1 PRO2783	LAMTOR3	0.000231267	0	0.00031599	0	0	0.000407958	0
LANC1_HUMAN	O43813	LANCL1 GPR69A	LANCL1	5.22675e-05	8.40811e-05	9.83079e-05	3.5961e-05	0.000100369	6.34601e-05	0.000102461
LANC2_HUMAN	Q9NS86	LANCL2 GPR69B TASP	LANCL2	0.000161819	0.000197838	0.00039034	0	7.38007e-05	0.000223977	0
PLSL_HUMAN	P13796	LCP1 PLS2	LCP1	0.000218952	0	0	0	0	0	0
LCP2_HUMAN	Q13094	LCP2	LCP2	0	0	6.93815e-05	0	0	0	0
LDLR_HUMAN	P01130	LDLR	LDLR	3.72306e-05	0.000172587	0.000209551	0.000323649	0	0.000330661	0
LEG3_HUMAN	P17931	LGALS3 MAC2	LGALS3	0.00150562	0.000630608	0.000320222	0.000744264	0	0.00142785	8.86682e-05
LIFR_HUMAN	P42702	LIFR	LIFR	0	0	5.35144e-05	0	0	0.000368478	0
LIMA1_HUMAN	Q9UHB6	LIMA1 EPLIN SREBP3 PP624	LIMA1	0.000453365	0.00142443	0.000636751	0.00141647	0.000194834	0.000191844	0.000420392
LIMS1_HUMAN	P48059	LIMS1 PINCH PINCH1	LIMS1	7.92613e-05	0	0	8.74726e-05	0	0	0
LIN7A_HUMAN	O14910	LIN7A MALS1 VELI1	LIN7A	0	0	0.000680593	0.00012448	0.000405336	0.000470581	0.000665012
LIN7C_HUMAN	Q9NUP9	LIN7C MALS3 VELI3	LIN7C	0.000267545	0.00057328	0.00083385	0.000768101	0.000786984	0.0015111	0.0010479
L2GL1_HUMAN	Q15334	LLGL1 DLG4 HUGL HUGL1	LLGL1	3.06017e-05	0	0	0	1.30916e-05	3.54494e-05	0
LMAN2_HUMAN	Q12907	LMAN2 C5orf8	LMAN2	0.000286378	0.000252243	0.000190282	0.000768666	0.000131734	0.000152876	0.000115269
LMBD1_HUMAN	Q9NUN5	LMBRD1 C6orf209 NESI BM-021 CD001 MSTP044	LMBRD1	2.88459e-05	0	0	0	0	0	0
LMO7_HUMAN	Q8WWI1	LMO7 FBX20 FBXO20 KIAA0858	LMO7	0.00019511	0.000561993	0.000114608	0.000273611	0.000756667	0	8.36146e-05
LCAP_HUMAN	Q9UIQ6	LNPEP OTASE	LNPEP	0.000113224	0.000129356	0.000321391	7.22147e-05	0	0.000488155	3.94081e-05
LORI_HUMAN	P23490	LORICRIN LOR LRN	LORICRIN	0.000770865	0	0	6.22401e-05	0	0.000439339	0.000354673
LPAR1_HUMAN	Q92633	LPAR1 EDG2 LPA1	LPAR1	0.000171668	0	0	0	0	0	0
PCAT1_HUMAN	Q8NF37	LPCAT1 AYTL2 PFAAP3	LPCAT1	9.46419e-05	0	0	0.000164567	0	0	0
LPP_HUMAN	Q93052	LPP	LPP	8.88687e-05	7.64374e-05	0	0	3.42167e-05	0	0
LRIG1_HUMAN	Q96JA1	LRIG1 LIG1	LRIG1	5.94439e-05	0	3.71752e-05	0	5.6932e-05	4.79951e-05	0
LRIG2_HUMAN	O94898	LRIG2 KIAA0806 LIG2	LRIG2	3.96292e-05	0	5.57629e-05	0	0	0.000335965	0
LRP1_HUMAN	Q07954	LRP1 A2MR APR	LRP1	0.000241455	0.000124873	3.06604e-05	0.000258297	0	2.82743e-05	0
LRP2_HUMAN	P98164	LRP2	LRP2	2.24725e-06	0	0	0	0	0	0
LRP5_HUMAN	O75197	LRP5 LR3 LRP7	LRP5	6.55345e-06	0	0	0	0	0	0
LRP6_HUMAN	O75581	LRP6	LRP6	0	0	0	0	0	4.75951e-05	0
LRP8_HUMAN	Q14114	LRP8 APOER2	LRP8	0	0	0.000104336	0.000106865	0	0.000323287	0
AMRP_HUMAN	P30533	LRPAP1 A2MRAP	LRPAP1	0.000416017	0.000953603	0.00122174	0.00027899	0.000110161	0.000621693	0.000281143
LRC32_HUMAN	Q14392	LRRC32 D11S833E	LRRC32	8.99782e-05	0.000210203	0	0	0	0.00015865	0
LRRC7_HUMAN	Q96NW7	LRRC7 KIAA1365 LAP1	LRRC7	6.78073e-06	0	0	0	0	0	0
LRC8A_HUMAN	Q8IWT6	LRRC8A KIAA1437 LRRC8 SWELL1 UNQ221/PRO247	LRRC8A	3.11986e-05	0	0	1.72154e-05	0	6.07597e-05	0
LRRF1_HUMAN	Q32MZ4	LRRFIP1 GCF2 TRIP	LRRFIP1	7.60865e-05	0.000198394	0.000273384	0.00017752	5.92064e-05	0	3.88546e-05
LRRN4_HUMAN	Q8WUT4	LRRN4 C20orf75	LRRN4	0	0	0	0.000163873	0	0	0
LSAMP_HUMAN	Q13449	LSAMP IGLON3 LAMP	LSAMP	0.000127456	0	0	0	0	0	9.34611e-05
TNR3_HUMAN	P36941	LTBR D12S370 TNFCR TNFR3 TNFRSF3	LTBR	5.01689e-05	0.000107338	0	0	0	0.000729116	0
LYN_HUMAN	P07948	LYN JTK8	LYN	3.99651e-05	0	0	0	0.00010207	0	0
LZTS1_HUMAN	Q9Y250	LZTS1 FEZ1	LZTS1	0	0	0	0	0	0	0
LZTS2_HUMAN	Q9BRK4	LZTS2 KIAA1813 LAPSER1	LZTS2	1.60694e-05	0	0	0	3.09356e-05	0	9.47414e-05
MPRD_HUMAN	P20645	M6PR MPR46 MPRD	M6PR	0.000104348	0.000528897	0.000310563	0.00073082	0.000121414	0.000592104	0.000148734
MACF1_HUMAN	Q9UPN3	MACF1 ABP620 ACF7 KIAA0465 KIAA1251	MACF1	5.25997e-06	0	0	0	1.70675e-05	0	0
MAGD1_HUMAN	Q9Y5V3	MAGED1 NRAGE PP2250 PRO2292	MAGED1	2.72806e-05	0	0	0	0	0	0
MAGI1_HUMAN	Q96QZ7	MAGI1 AIP3 BAIAP1 BAP1 TNRC19	MAGI1	0	0	0	0	9.12445e-06	0	4.89019e-05
MAGI3_HUMAN	Q5TCQ9	MAGI3 KIAA1634	MAGI3	0	1.5475e-05	0	0	0	0	0
MAGT1_HUMAN	Q9H0U3	MAGT1 IAG2 PSEC0084 UNQ628/PRO1244	MAGT1	8.50483e-05	0	0	0	0	0	0
MANBA_HUMAN	O00462	MANBA MANB1	MANBA	0	0	0	0.000112156	0	0	0
MAP1B_HUMAN	P46821	MAP1B	MAP1B	0.000199554	0.000195465	1.5602e-05	8.35993e-05	8.33321e-05	1.05377e-05	4.6788e-05
MP2K1_HUMAN	Q02750	MAP2K1 MEK1 PRKMK1	MAP2K1	0.000136403	5.86612e-05	9.68114e-05	0.000112901	0.000245087	0	0
MP2K2_HUMAN	P36507	MAP2K2 MEK2 MKK2 PRKMK2	MAP2K2	0.000119973	0	0	0	0.000119758	0	0
M3K5_HUMAN	Q99683	MAP3K5 ASK1 MAPKKK5 MEKK5	MAP3K5	1.52125e-05	0	0	0	0	0	0
MAP4_HUMAN	P27816	MAP4	MAP4	0.00056594	0.000833862	0.000360216	0.000587118	0.000286176	0.000471682	0.000257211
MK01_HUMAN	P28482	MAPK1 ERK2 PRKM1 PRKM2	MAPK1	0.000215089	0.000369136	0.000215798	0.000169927	0.000385564	0.000298294	0.0003936
MK03_HUMAN	P27361	MAPK3 ERK1 PRKM3	MAPK3	0.000116149	0	5.14402e-05	0.000150534	0	0	0
MARE1_HUMAN	Q15691	MAPRE1	MAPRE1	0.00029366	0.000294284	0.000511767	0.000537146	0.000853136	0.00115506	0.000806881
MARCS_HUMAN	P29966	MARCKS MACS PRKCSL	MARCKS	0.00062476	0.000867086	0.00105713	0.00152616	0.000846863	0.00145308	0.000468279
MRP_HUMAN	P49006	MARCKSL1 MLP MRP	MARCKSL1	0.000161887	0.000189182	0.000653792	0.000404561	0.000564575	0.000724017	0.000230537
MARK2_HUMAN	Q7KZI7	MARK2 EMK1	MARK2	0	0	0	0	7.69875e-05	0	0
MARK3_HUMAN	P27448	MARK3 CTAK1 EMK2	MARK3	3.49127e-05	0	0	0	2.68845e-05	0	0
MBP_HUMAN	P02686	MBP	MBP	0	0	0	9.80754e-05	0	0	0
MUC18_HUMAN	P43121	MCAM MUC18	MCAM	0.000781005	0.00439674	0.00289586	0.000157329	0.00055412	0.0032264	0.00182509
MCMBP_HUMAN	Q9BTE3	MCMBP C10orf119	MCMBP	0	0	0	6.65032e-05	2.06238e-05	0	0
MCTS1_HUMAN	Q9ULC4	MCTS1 MCT1	MCTS1	0.000111721	0	0	0	0	0	0
MEG10_HUMAN	Q96KG7	MEGF10 KIAA1780	MEGF10	0	9.30405e-05	0.000132236	0	0.00029	0.000521622	0.000151172
TRFM_HUMAN	P08582	MELTF MAP97 MFI2	MELTF	0.000162108	0	2.76491e-05	6.99473e-05	0	3.56963e-05	5.76343e-05
MERTK_HUMAN	Q12866	MERTK MER	MERTK	0	0	2.01084e-05	1.47113e-05	0	7.78829e-05	0
MESD_HUMAN	Q14696	MESD KIAA0081 MESDC2 MESDM UNQ1911/PRO4369	MESD	0.000169419	9.70166e-05	0.000935815	0.00112032	0.000173715	0.00021967	0.000221671
MET_HUMAN	P08581	MET	MET	0	5.6593e-05	0.000212685	0	0	0.0003242	3.69451e-05
MAP2_HUMAN	P50579	METAP2 MNPEP P67EIF2	METAP2	3.32e-05	0	0	0.000122132	0.000127828	0	4.34976e-05
MFGM_HUMAN	Q08431	MFGE8	MFGE8	2.72806e-05	0	0.00015432	0.000186585	0	0.000132824	0
MFS10_HUMAN	Q14728	MFSD10 TETRAN	MFSD10	0	0	0	0.00010114	0	0	0
MGA_HUMAN	O43451	MGAM MGA MGAML	MGAM	0	0	0	3.85296e-05	0	0	0
MGLL_HUMAN	Q99685	MGLL	MGLL	0	0.000267531	0	0	0	0	0
MGRN1_HUMAN	O60291	MGRN1 KIAA0544 RNF156	MGRN1	3.86064e-05	6.2027e-05	0.000145044	0.000135577	4.93618e-05	0.000374519	3.7793e-05
MGST1_HUMAN	P10620	MGST1 GST12 MGST	MGST1	0.000619774	0	0	0.000449512	0	0	0
MIB1_HUMAN	Q86YT6	MIB1 DIP1 KIAA1323 ZZANK2	MIB1	0	5.7328e-05	0	3.84051e-05	0	0	0
MICA_HUMAN	Q29983	MICA PERB11.1	MICA	0	0	0	0	0	0.000597706	0
MICA1_HUMAN	Q8TDZ2	MICAL1 MICAL NICAL	MICAL1	0	0	0	0	1.27588e-05	0	3.90741e-05
MICA3_HUMAN	Q7RTP6	MICAL3 KIAA0819 KIAA1364	MICAL3	0	0	0	0	2.01634e-05	0	0
MIEN1_HUMAN	Q9BRT3	MIEN1 C17orf37 RDX12 XTP4	MIEN1	0	0	0	0.000269707	0	0	0
MIF_HUMAN	P14174	MIF GLIF MMIF	MIF	0.000613432	0.000210203	0.000265617	0.000715438	0.000501845	0.000492768	0.000672401
MLEC_HUMAN	Q14165	MLEC KIAA0152	MLEC	0.000394446	0.000197065	0.000300858	0.000809122	0.00011762	0.000140168	7.20429e-05
MLIP_HUMAN	Q5VWP3	MLIP C6orf142 Cip	MLIP	0	0	0	0	0.000602214	0	0
NEP_HUMAN	P08473	MME EPN	MME	0.000181249	0.000131988	0.000263233	0.000240163	9.62841e-05	0.000206334	4.021e-05
MMP14_HUMAN	P50281	MMP14	MMP14	0.000289807	0.000592389	0.000625893	0.000278873	0	0.00059016	0.000331834
MMP15_HUMAN	P51511	MMP15	MMP15	0	0	5.82086e-05	2.12927e-05	0	0	0
MMP2_HUMAN	P08253	MMP2 CLG4A	MMP2	1.58523e-05	0	0	0	0	0	0
MO4L2_HUMAN	Q15014	MORF4L2 KIAA0026 MRGX	MORF4L2	0	0	0.000138245	0	0	0	0
MSPD2_HUMAN	Q8NHP6	MOSPD2	MOSPD2	0	0	0	0.000296678	0	0	0
MPDZ_HUMAN	O75970	MPDZ MUPP1	MPDZ	1.84943e-05	0	0	0	1.69542e-05	0	0
MPP2_HUMAN	Q14168	MPP2 DLG2	MPP2	0	0	0	0	0	0	0.000212804
MPP5_HUMAN	Q8N3R9	MPP5 PALS1	MPP5	0	0	0	0	4.8881e-05	0	0
MPP6_HUMAN	Q9NZW5	MPP6 VAM1	MPP6	0	6.2027e-05	7.25222e-05	0	2.46809e-05	0	5.66895e-05
MPZL1_HUMAN	O95297	MPZL1 PZR UNQ849/PRO1787	MPZL1	0.000253834	0.000739334	0.000446392	0.000833804	5.1915e-05	0.00148405	0.000158991
RM44_HUMAN	Q9H9J2	MRPL44	MRPL44	9.26105e-05	0	0	0	0	0	0
MSLN_HUMAN	Q13421	MSLN MPF	MSLN	0	0	0	4.69056e-05	0	0	0
MOES_HUMAN	P26038	MSN	MSN	0.00114509	0.000723345	0.00107905	0.0019384	0.000564575	0.0016192	0.000508538
LYRIC_HUMAN	Q86UE4	MTDH AEG1 LYRIC	MTDH	0.00023851	0.000118239	0.000843695	0.000606841	0.00029405	5.41593e-05	0.000108064
MTMR2_HUMAN	Q13614	MTMR2 KIAA1073	MTMR2	0	0	0	0	2.06238e-05	0	0
MUC5A_HUMAN	P98088	MUC5AC MUC5	MUC5AC	0	0	0	0	0	0	1.37693e-05
MUC5B_HUMAN	Q9HC84	MUC5B MUC5	MUC5B	0	0	0	0	0	0	8.31636e-05
MUCL1_HUMAN	Q96DR8	MUCL1 SBEM UNQ590/PRO1160	MUCL1	0.00078598	0	0	0	0	0	0
MUSK_HUMAN	O15146	MUSK	MUSK	0	0	0	0	0	8.83208e-05	0
MXRA8_HUMAN	Q9BRK3	MXRA8	MXRA8	0.000258561	0.000489043	0	8.62155e-05	0	0	0
MYADM_HUMAN	Q96S97	MYADM UNQ553/PRO1110	MYADM	0.000184845	0.000360348	0.000182138	0.000970946	0	0.00013983	0
MYD88_HUMAN	Q99836	MYD88	MYD88	3.55475e-05	0	0	0	0	0	0
MYH10_HUMAN	P35580	MYH10	MYH10	0.000332614	0.000115657	2.89772e-05	0.000127198	0.000828372	9.79116e-05	0.000231544
MYH9_HUMAN	P35579	MYH9	MYH9	0.00135403	0.00117232	0.000318656	0.000957637	0.00159839	0.000327795	0.000817544
MYLK_HUMAN	Q15746	MYLK MLCK MLCK1 MYLK1	MYLK	5.55956e-06	1.19547e-05	0	7.87128e-05	0	0	0
MYO1B_HUMAN	O43795	MYO1B	MYO1B	0.000193781	6.68827e-05	8.37851e-05	1.22594e-05	0.000125461	0.000108094	4.36624e-05
MYO1C_HUMAN	O00159	MYO1C	MYO1C	0.000339472	0.000113716	0	0.000107023	9.87235e-05	0	7.5586e-05
MYO6_HUMAN	Q9UM54	MYO6 KIAA0389	MYO6	4.12344e-05	1.68162e-05	0	0	0	0	2.30537e-05
MYOF_HUMAN	Q9NZM1	MYOF FER1L3 KIAA1207	MYOF	0.000292521	0.000144906	0	2.69653e-05	0	2.43039e-05	0
ULA1_HUMAN	Q13564	NAE1 APPBP1 HPP1	NAE1	7.35134e-05	0	0	8.09122e-05	3.76383e-05	0	0
NAMPT_HUMAN	P43490	NAMPT PBEF PBEF1	NAMPT	0.000162713	0	0	0.000433458	2.68845e-05	0	8.23348e-05
SNAA_HUMAN	P54920	NAPA SNAPA	NAPA	0.000195958	7.64374e-05	0.00033514	0.000539415	0.000114056	0.000105036	0.00010479
NCAM1_HUMAN	P13591	NCAM1 NCAM	NCAM1	3.72306e-05	0.00160639	0.00189479	0	0.000665604	0.000729565	0.000570277
NCAM2_HUMAN	O15394	NCAM2 NCAM21	NCAM2	0.000114094	0	0	4.54254e-05	0	0.00138179	0
NCKP1_HUMAN	Q9Y2A7	NCKAP1 HEM2 KIAA0587 NAP1	NCKAP1	4.54677e-05	0	0	0	4.66832e-05	0	0
NR3L1_HUMAN	Q68D85	NCR3LG1 B7H6	NCR3LG1	0	0	0.000130113	0	2.95203e-05	0.000335965	0
NCS1_HUMAN	P62166	NCS1 FLUP FREQ	NCS1	0.000160366	0	0.000295695	0.000441339	0.000239517	0.000482066	0
NICA_HUMAN	Q92542	NCSTN KIAA0253 UNQ1874/PRO4317	NCSTN	0.000135808	0.000226372	0.000279398	0.00041461	0.00011581	0.000491605	7.38902e-05
NDE1_HUMAN	Q9NXR1	NDE1 NUDE	NDE1	4.63053e-05	0	0.000291043	0	0.000158477	0.0001503	9.10016e-05
NDRG1_HUMAN	Q92597	NDRG1 CAP43 DRG1 RTP	NDRG1	4.09209e-05	0	0	7.52672e-05	0	0	0
NDUC2_HUMAN	O95298	NDUFC2 HLC1	NDUFC2	0.000293267	0	0	0.000346767	0	0	0
NDUS7_HUMAN	O75251	NDUFS7	NDUFS7	0.000268828	0	0	0	0	0	0
NECP1_HUMAN	Q8NC96	NECAP1	NECAP1	0.000157196	0	0	5.39415e-05	5.01845e-05	0.000285571	0
NECP2_HUMAN	Q9NVZ3	NECAP2	NECAP2	0.000157634	0.000225217	0.000157995	0.000150877	0	0.00010199	8.23348e-05
NECT1_HUMAN	Q15223	NECTIN1 HVEC PRR1 PVRL1	NECTIN1	0	0	0.000594621	2.83902e-05	9.24451e-05	0.000869404	0.000606677
NECT2_HUMAN	Q92692	NECTIN2 HVEB PRR2 PVRL2	NECTIN2	0.000456901	0.000913295	0.000749235	0.0010322	0.000142766	0.00131163	0.000437226
NECT3_HUMAN	Q9NQS3	NECTIN3 PRR3 PVRL3	NECTIN3	0.000212262	0.000640946	0.00026875	0.000484785	0	0.00191941	0
NEDD4_HUMAN	P46934	NEDD4 KIAA0093 NEDD4-1 PIG53	NEDD4	1.18094e-05	0	0	0	0	0	0
CASL_HUMAN	Q14511	NEDD9 CASL CASS2	NEDD9	0	0	0	0	0	4.38353e-05	0
NEGR1_HUMAN	Q7Z3B1	NEGR1 IGLON4 UNQ2433/PRO4993	NEGR1	0.000226347	0.000840811	0.000340296	0.000239136	0	0.00124479	0
NELFE_HUMAN	P18615	NELFE RD RDBP	NELFE	0	0.000117322	0.000205761	0	8.7531e-05	0	5.36133e-05
NEO1_HUMAN	Q92859	NEO1 IGDCC2 NGN	NEO1	0.000176845	9.45912e-05	0.000248842	6.02587e-05	7.05719e-05	0.000103242	0
NEUR1_HUMAN	Q99519	NEU1 NANH	NEU1	5.88501e-05	0	0	0	0	0	0
NEXN_HUMAN	Q0ZGT2	NEXN	NEXN	9.0733e-05	0.00124565	0.000223256	0.000492423	0.000111521	0	2.84614e-05
MERL_HUMAN	P35240	NF2 SCH	NF2	0.000108928	5.40521e-05	0	0	5.37691e-05	0	0
NFASC_HUMAN	O94856	NFASC KIAA0756	NFASC	8.83735e-05	3.36324e-05	0.000781548	6.92163e-05	1.00369e-05	0.000252808	0.000130638
TNR16_HUMAN	P08138	NGFR TNFRSF16	NGFR	0.000235794	0.00277468	0.0049874	0	0.00128807	0.000706692	0.00215168
NIBA1_HUMAN	Q9BZQ8	NIBAN1 C1orf24 FAM129A NIBAN GIG39	NIBAN1	3.71002e-05	0	0	0	0	0	0
NIBA2_HUMAN	Q96TA1	NIBAN2 C9orf88 FAM129B	NIBAN2	0.000164336	3.0029e-05	7.89974e-05	9.6324e-05	0	0	0
NID1_HUMAN	P14543	NID1 NID	NID1	1.7251e-05	0	0	0	0.000166052	0	0
NID2_HUMAN	Q14112	NID2	NID2	1.55373e-05	0	0	0	0	0	0
NIN_HUMAN	Q8N4C6	NIN KIAA1565	NIN	7.24115e-06	2.07608e-05	0	0	6.19561e-06	2.51647e-05	0
NIPS1_HUMAN	Q9BPW8	NIPSNAP1	NIPSNAP1	0.00028438	0	0	9.80754e-05	0	0	0
NEUL_HUMAN	Q9BYT8	NLN AGTBP KIAA1226	NLN	6.16227e-05	0	5.46155e-05	0.00035961	0	0	0
NLRP6_HUMAN	P59044	NLRP6 NALP6 PYPAF5	NLRP6	2.96229e-05	0	0	0	0	0	0
NDKA_HUMAN	P15531	NME1 NDPKA NM23	NME1	0.00199115	0.0020773	0.00280474	0.00259224	0.00115129	0.00245889	0.0013561
NMT1_HUMAN	P30419	NMT1 NMT	NMT1	5.15539e-05	0	0	8.51707e-05	6.60322e-05	0	0
NOTC1_HUMAN	P46531	NOTCH1 TAN1	NOTCH1	5.20134e-05	7.41892e-05	1.62642e-05	2.32972e-05	5.53505e-06	6.29749e-05	4.23782e-05
NOTC2_HUMAN	Q04721	NOTCH2	NOTCH2	0.000247889	0.000318874	6.92253e-05	0.000157648	1.42031e-05	0.000154675	6.52464e-05
NOTC3_HUMAN	Q9UM47	NOTCH3	NOTCH3	0.000147287	0.00042902	3.62611e-05	8.65688e-05	9.25533e-06	0.000123695	4.72413e-05
NPC1_HUMAN	O15118	NPC1	NPC1	3.31065e-05	0	1.5577e-05	9.11687e-05	0	8.04424e-05	0
ANPRC_HUMAN	P17342	NPR3 ANPRC C5orf23 NPRC	NPR3	0.000682254	0.000252243	0	0	0	0	0
NPTN_HUMAN	Q9Y639	NPTN SDFR1 SDR1	NPTN	0.000220285	0.000659272	0.000470161	0.000384051	0.000222408	0.000658197	0.00010479
RASN_HUMAN	P01111	NRAS HRAS1	NRAS	0.000474813	0	0.00010533	0.000693533	0.000215076	0	0
NRCAM_HUMAN	Q92823	NRCAM KIAA0343	NRCAM	1.63746e-05	0	0.000364555	0.000106286	2.09102e-05	0.00184284	4.80286e-05
NRG1_HUMAN	Q02297	NRG1 GGF HGL HRGA NDF SMDF	NRG1	0	0	0	0	0	8.15916e-05	0
NRN1_HUMAN	Q9NPD7	NRN1 NRN	NRN1	0	0	0	0	0	0	0.000153692
NRP1_HUMAN	O14786	NRP1 NRP VEGF165R	NRP1	0.00103831	0.000575506	2.1475e-05	0.000224507	0	0.000332704	0
NRP2_HUMAN	O60462	NRP2 VEGF165R2	NRP2	0	2.40232e-05	0.000110892	0.000158175	2.15076e-05	0.000339917	3.29339e-05
NRX3A_HUMAN	Q9Y4C0	NRXN3 C14orf60 KIAA0743	NRXN3	0	0	0	3.50102e-05	0	0	0
NSF_HUMAN	P46459	NSF	NSF	0.000226418	3.03908e-05	0.000103455	0.000141611	3.62779e-05	0.000196467	0.000111102
NSF1C_HUMAN	Q9UNZ2	NSFL1C UBXN2C	NSFL1C	0.000129039	0	0.000107899	0	0.000532445	0.000149147	0.000140572
5NTD_HUMAN	P21589	NT5E NT5 NTE	NT5E	0.00100355	0.0017617	0.000958125	0.000859292	0	0.0019038	0
NTRI_HUMAN	Q9P121	NTM IGLON2 NT UNQ297/PRO337	NTM	0.00018592	0.00106208	0	0	0	0.0013527	0
NTNG1_HUMAN	Q9Y2I2	NTNG1 KIAA0976 LMNT1 UNQ571/PRO1133	NTNG1	7.73095e-05	0	0	0	0	0	0
NUBP1_HUMAN	P53384	NUBP1 NBP NBP1	NUBP1	0	0	0	0	6.45229e-05	0	0
NUCB2_HUMAN	P80303	NUCB2 NEFA	NUCB2	0.000123408	0	4.42385e-05	0.000776757	4.5166e-05	0	0
8ODP_HUMAN	P36639	NUDT1 MTH1	NUDT1	7.65044e-05	0	9.61707e-05	0.000140717	9.8187e-05	0	0
NUMA1_HUMAN	Q14980	NUMA1 NMP22 NUMA	NUMA1	1.23221e-05	0	0	2.0398e-05	0	1.19988e-05	0
NUMB_HUMAN	P49757	NUMB C14orf41	NUMB	5.79104e-05	0	0	0	0	0	0
NUP35_HUMAN	Q8NFH5	NUP35 MP44 NUP53	NUP35	3.35162e-05	0	0	0	0	0	0
OBSCN_HUMAN	Q5VST9	OBSCN KIAA1556 KIAA1639	OBSCN	1.35146e-06	0	0	0	0	0	0
OCRL_HUMAN	Q01968	OCRL OCRL1	OCRL	0	0	0	0	0	0	2.21671e-05
OGT1_HUMAN	O15294	OGT	OGT	1.50393e-05	0	0	0	1.28678e-05	0	0
OPA1_HUMAN	O60313	OPA1 KIAA0567	OPA1	0.000146871	3.37826e-05	9.75817e-05	0.000115589	0	0.000127396	2.05837e-05
ORML3_HUMAN	Q8N138	ORMDL3	ORMDL3	0.000138008	0	0	0	0	0	0
OSBL3_HUMAN	Q9H4L5	OSBPL3 KIAA0704 ORP3 OSBP3	OSBPL3	1.16145e-05	0	0	0	0	0	0
OSMR_HUMAN	Q99650	OSMR OSMRB	OSMR	0.000156572	4.54492e-05	0	0.000115404	0	0.000488815	0
PDIA1_HUMAN	P07237	P4HB ERBA2L PDI PDIA1 PO4DB	P4HB	0.00267731	0.00230117	0.00332334	0.00550102	0.0018489	0.00188158	0.00167847
PACC1_HUMAN	Q9H813	PACC1 C1orf75 TMEM206	PACC1	0	0	0.000110596	8.09122e-05	0	0	0
PACN2_HUMAN	Q9UNF0	PACSIN2	PACSIN2	6.28429e-05	0	0.000157995	0	2.68845e-05	0.000109197	0
PACN3_HUMAN	Q9UKS6	PACSIN3	PACSIN3	6.12817e-05	5.25507e-05	0	0	0.000156826	0	0
PA1B2_HUMAN	P68402	PAFAH1B2 PAFAHB	PAFAH1B2	9.02359e-05	0	0	0	8.68577e-05	0	0.000221671
PHAG1_HUMAN	Q9NWQ8	PAG1 CBP PAG	PAG1	5.01689e-05	0	0.000265716	0	0.000336343	0.000364558	4.90505e-05
PAK1_HUMAN	Q13153	PAK1	PAK1	0	0	0	0	6.17022e-05	0	0
PAK2_HUMAN	Q13177	PAK2	PAK2	0.000131464	0	0	0.000446412	0.000181702	7.02876e-05	3.97478e-05
PALLD_HUMAN	Q8WX93	PALLD KIAA0992 CGI-151	PALLD	5.25948e-05	0.000283982	4.39456e-05	7.73881e-05	3.48965e-05	0	0.00014504
PALM_HUMAN	O75781	PALM KIAA0270	PALM	0.000112283	9.00869e-05	0.00010533	0.000115589	0.000555614	0	0.000466564
PALM2_HUMAN	Q8IXS6	PALM2	PALM2	0	6.00579e-05	0.000789974	0	0.00035846	0	0.000192114
AMD_HUMAN	P19021	PAM	PAM	0	0	2.04808e-05	4.49512e-05	0	5.28834e-05	0
PANX1_HUMAN	Q96RD7	PANX1 MRS1 UNQ2529/PRO6028	PANX1	0	0	0	0.000134854	0	5.94939e-05	0
PARD3_HUMAN	Q8TEW0	PARD3 PAR3 PAR3A	PARD3	0	0	0	0	2.49261e-05	0	1.52674e-05
PARK7_HUMAN	Q99497	PARK7	PARK7	0.000999911	0.000315304	0.00100826	0.000979894	0.0012797	0.00129465	0.00195957
PARVA_HUMAN	Q9NVD7	PARVA MXRA2	PARVA	0.000146844	0.000120116	0	0	0	0	0
PCD12_HUMAN	Q9NPG4	PCDH12 UNQ395/PRO731	PCDH12	1.81871e-05	0	9.68114e-05	0	0	0	0
PCD18_HUMAN	Q9HCL0	PCDH18 KIAA1562	PCDH18	2.80707e-05	0	0	0	1.19487e-05	0	0
PCDH7_HUMAN	O60245	PCDH7 BHPCDH	PCDH7	2.03271e-05	0.000152216	0.00070044	0.000343478	5.1915e-05	0.0012326	6.95587e-05
PCDH9_HUMAN	Q9HC56	PCDH9	PCDH9	2.60067e-05	1.85473e-05	0	0	0	0	0
PCDBA_HUMAN	Q9UN67	PCDHB10 UNQ1906/PRO4352	PCDHB10	0	0	0.000100542	0	0	6.49024e-05	0
PCDB2_HUMAN	Q9Y5E7	PCDHB2	PCDHB2	0	0	0.000101698	0	0	0.000164121	0
PCDB5_HUMAN	Q9Y5E4	PCDHB5	PCDHB5	0	0	7.71602e-05	0	0	3.32059e-05	0
PCDB8_HUMAN	Q9UN66	PCDHB8 PCDH3I	PCDHB8	0	0	7.54066e-05	0	0	6.49024e-05	0
PCDGK_HUMAN	Q9UN70	PCDHGC3 PCDH2	PCDHGC3	0.000186767	0	0.000139768	0	0	0.000133279	0
PCDGM_HUMAN	Q9Y5F6	PCDHGC5	PCDHGC5	0	0	8.16253e-05	0	0	3.99675e-05	0
PCYOX_HUMAN	Q9UHG3	PCYOX1 KIAA0908 PCL1 UNQ597/PRO1183	PCYOX1	0.000247427	8.85064e-05	0.000224822	0	7.92386e-05	0.000178802	4.04451e-05
PCY1A_HUMAN	P49585	PCYT1A CTPCT PCYT1	PCYT1A	9.77556e-05	6.00579e-05	0	0	0	0	0
HAP28_HUMAN	Q13442	PDAP1 HASPP28	PDAP1	0.000265758	0	0.000526649	0.00123295	0.000465999	0.000485319	0.00010978
PDC10_HUMAN	Q9BUL8	PDCD10 CCM3 TFAR15	PDCD10	9.40815e-05	0.000201795	0.000442385	0.000258919	0.000120443	0	0.000230537
PD1L2_HUMAN	Q9BQ51	PDCD1LG2 B7DC CD273 PDCD1L2 PDL2	PDCD1LG2	0.000123364	0.000325475	0.000142705	0.000120339	0	9.21196e-05	0
PDC6I_HUMAN	Q8WUM4	PDCD6IP AIP1 ALIX KIAA1375	PDCD6IP	0.000244789	0	6.50451e-05	0.000421418	1.56826e-05	6.36981e-05	0
PGFRA_HUMAN	P16234	PDGFRA PDGFR2 RHEPDGFRA	PDGFRA	0.000126799	4.10152e-05	0	4.34859e-05	0	0	0
PGFRB_HUMAN	P09619	PDGFRB PDGFR PDGFR1	PDGFRB	0.000102007	0.000132224	0	9.67798e-05	0	0	0
PDIA6_HUMAN	Q15084	PDIA6 ERP5 P5 TXNDC7	PDIA6	0.00117028	0.000761985	0.00127935	0.00140604	0.000988007	0.000637087	0.00103262
PDLI4_HUMAN	P50479	PDLIM4 RIL	PDLIM4	0.000277099	0.000828799	0.000468392	0.000708871	0.000215076	0.00024463	0.000790414
PDLI5_HUMAN	Q96HC4	PDLIM5 ENH L9	PDLIM5	0.000183476	0.00039413	4.98033e-05	0.000243004	0	6.36981e-05	0
PDPN_HUMAN	Q86YL7	PDPN GP36 PSEC0003 PSEC0025	PDPN	0	0	0	0.000475954	0	0	0
PDS5A_HUMAN	Q29RF7	PDS5A KIAA0648 PDS5 PIG54	PDS5A	2.3306e-05	0	0	4.28674e-05	1.99408e-05	0	0
PLPP_HUMAN	Q96GD0	PDXP CIN PLP PLPP	PDXP	0	0	0	0.00010114	4.70479e-05	0	0
PDZ11_HUMAN	Q5EBL8	PDZD11 AIPP1 PDZK11 PISP HSPC227 UNQ6486/PRO21335	PDZD11	0	0	0.000276491	0.00020228	9.40959e-05	0.000178482	0
PEAR1_HUMAN	Q5VY43	PEAR1 MEGF12	PEAR1	0.000106213	0.000238608	0	9.51477e-05	0	0	0
PECA1_HUMAN	P16284	PECAM1	PECAM1	0	0	0.000159898	0	0	0	0
PEX19_HUMAN	P40855	PEX19 HK33 PXF OK/SW-cl.22	PEX19	0	0	0.000134056	0.000147113	0	0	0
PFKAM_HUMAN	P08237	PFKM PFKX	PFKM	4.16107e-05	0	0	0	2.65682e-05	4.7961e-05	0
PGM5_HUMAN	Q15124	PGM5 PGMRP	PGM5	0	4.06844e-05	0.000463791	0	0	0.000164382	0.000278876
PGRC1_HUMAN	O00264	PGRMC1 HPR6.6 PGRMC	PGRMC1	0.00101565	0.00206381	0.00277663	0.00209521	0.000444817	0.00151064	0.000314369
PHB_HUMAN	P35232	PHB PHB1	PHB	0.000783225	8.40811e-05	0.00113403	0.00100161	0.00022583	0.000659097	7.68458e-05
PHLB2_HUMAN	Q86SQ0	PHLDB2 LL5B	PHLDB2	0	0	0	0	0.000127228	0	5.68226e-05
P4K2A_HUMAN	Q9BTU6	PI4K2A	PI4K2A	5.43086e-05	0	0	8.99024e-05	0	0	0
PI4KA_HUMAN	P42356	PI4KA PIK4 PIK4CA	PI4KA	0	0	0	0	9.52869e-06	0	0
PIANP_HUMAN	Q8IYJ0	PIANP C12orf53 PANP UNQ828/PRO1755	PIANP	0.000117897	0	0	0	0	0	0
PICAL_HUMAN	Q13492	PICALM CALM	PICALM	0.000173856	0.000479617	6.23078e-05	0.000343444	6.36141e-05	0	0
PIEZ1_HUMAN	Q92508	PIEZO1 FAM38A KIAA0233	PIEZO1	0	0	0	1.1277e-05	0	0	0
PIGR_HUMAN	P01833	PIGR	PIGR	0.00124635	0.000136758	0.00012696	9.58443e-05	4.53474e-05	0.000113005	0.000861043
PI42A_HUMAN	P48426	PIP4K2A PI5P4KA PIP5K2 PIP5K2A	PIP4K2A	3.82522e-05	0	0	0	6.5458e-05	0	0
PI42B_HUMAN	P78356	PIP4K2B PIP5K2B	PIP4K2B	6.23972e-05	5.36688e-05	0	0	0.000128131	0	0
PI51A_HUMAN	Q99755	PIP5K1A	PIP5K1A	0	0	0	0	5.97434e-05	0	0
PI51C_HUMAN	O60331	PIP5K1C KIAA0589	PIP5K1C	1.60694e-05	0	0	0	0	0	0
PKD2_HUMAN	Q13563	PKD2 TRPP2	PKD2	2.13285e-05	0	0	0	0	0	0
PKN1_HUMAN	Q16512	PKN1 PAK1 PKN PRK1 PRKCL1	PKN1	1.12795e-05	0	0	0	0	0	0
PKN2_HUMAN	Q16513	PKN2 PRK2 PRKCL2	PKN2	1.57107e-05	0	0	0	0	0	0
PKP1_HUMAN	Q13835	PKP1	PKP1	0.000411929	0	0.000159898	0.000135658	3.62779e-05	0.000206437	0.000527736
PKP4_HUMAN	Q99569	PKP4	PKP4	0	0	0	0	6.27306e-05	0	0
UROK_HUMAN	P00749	PLAU	PLAU	0.000107972	0	0.000127435	0	0	0.000407958	0
UPAR_HUMAN	Q03405	PLAUR MO3 UPAR	PLAUR	0.000143229	0.000374956	0	0.000194974	0	0.00393624	0
PLCG1_HUMAN	P19174	PLCG1 PLC1	PLCG1	7.87293e-06	0	0	0	4.0417e-05	4.10404e-05	0
PLEC_HUMAN	Q15149	PLEC PLEC1	PLEC	0.000380727	0.0004694	0.000126309	0.000459654	0.000324029	2.95042e-05	0.000322839
PKHH2_HUMAN	Q8IVE3	PLEKHH2 KIAA2028	PLEKHH2	0	0	0	0	0	2.4266e-05	0
PLMN_HUMAN	P00747	PLG	PLG	0	0	0	0	4.13608e-05	0	0
PLRKT_HUMAN	Q9HBL7	PLGRKT C9orf46 AD025 MDS030	PLGRKT	0	0	0	0.000380763	0	0	0
PLIN2_HUMAN	Q99541	PLIN2 ADFP	PLIN2	0.000299684	0	0	8.80116e-05	0	8.49309e-05	0
PLP2_HUMAN	Q04941	PLP2 A4	PLP2	0.000103506	0	0	0	0	0	0
PLPP1_HUMAN	O14494	PLPP1 LPP1 PPAP2A	PLPP1	0	0	0	0.00020228	0	0	0
PLPP2_HUMAN	O43688	PLPP2 LPP2 PPAP2C	PLPP2	0	0	0	9.80754e-05	0	0	0
PLPP3_HUMAN	O14495	PLPP3 LPP3 PPAP2B	PLPP3	0.000218699	7.20695e-05	0	0	0	0	0
PLST_HUMAN	P13797	PLS3	PLS3	0.000455562	0.000515145	0.000293205	0.000582762	0.000116626	0.000284248	3.247e-05
PLS1_HUMAN	O15162	PLSCR1	PLSCR1	5.02743e-05	0	0.000184002	0.000231178	0	0.000326366	0
PLS3_HUMAN	Q9NRY6	PLSCR3	PLSCR3	0.000146633	0	0	0.000198026	0	8.92408e-05	0
PLS4_HUMAN	Q9NRQ2	PLSCR4 GIG43	PLSCR4	4.75568e-05	0	0	0	0	0	0
PLXA1_HUMAN	Q9UIW2	PLXNA1 NOV PLXN1	PLXNA1	0.000181441	0.000382549	0.000326801	0.000140151	7.13523e-05	0.000204853	0.000103796
PLXA2_HUMAN	O75051	PLXNA2 KIAA0463 OCT PLXN2 UNQ209/PRO235	PLXNA2	9.49881e-05	0	0.000159396	3.8347e-05	3.56762e-05	0.00025129	3.82408e-05
PLXA3_HUMAN	P51805	PLXNA3 PLXN4 SEX	PLXNA3	6.22784e-05	9.09531e-05	0	0	0	0	0
PLXA4_HUMAN	Q9HCM2	PLXNA4 KIAA1550 PLXNA4A PLXNA4B UNQ2820/PRO34003	PLXNA4	6.67341e-05	0	0	0	0	0	0
PLXB2_HUMAN	O15031	PLXNB2 KIAA0315	PLXNB2	0.000485577	0.000430659	0.000371918	0.000537495	0.000205634	0.00115001	0.000219292
PLXC1_HUMAN	O60486	PLXNC1 VESPR	PLXNC1	0	0	0	0	0	0	3.27468e-05
PLXD1_HUMAN	Q9Y4D7	PLXND1 KIAA0620	PLXND1	4.44616e-05	2.37965e-05	6.26017e-05	0	0	3.94351e-05	0
PMEPA_HUMAN	Q969W9	PMEPA1 STAG1 TMEPAI	PMEPA1	0	0	0.000207368	0	0	0	0
PININ_HUMAN	Q9H307	PNN DRS MEMA	PNN	2.86114e-05	0	0.000404621	0	3.67203e-05	0	4.21715e-05
PODXL_HUMAN	O00592	PODXL PCLP PCLP1	PODXL	9.99127e-05	0.00061992	0.000390331	5.48557e-05	0	0.000317946	5.86112e-05
PDXL2_HUMAN	Q9NZ53	PODXL2 UNQ1861/PRO3742	PODXL2	0	0	0	0	0	0.000131802	0
PON2_HUMAN	Q15165	PON2	PON2	0.000188294	0	8.17284e-05	0.000414934	0	0	0
LIPB1_HUMAN	Q86W92	PPFIBP1 KIAA1230	PPFIBP1	3.08702e-05	0	0	0	1.32064e-05	0	0
PEPL_HUMAN	O60437	PPL KIAA0568	PPL	4.02575e-05	1.23045e-05	0	0	0	0	0
PPM1A_HUMAN	P35813	PPM1A PPPM1A	PPM1A	0	0	5.26649e-05	7.70592e-05	3.5846e-05	0	5.48898e-05
PP1A_HUMAN	P62136	PPP1CA PPP1A	PPP1CA	0.000542092	0.000896127	0.000393725	0.000518651	0.000673528	0.000541983	0.00094035
PP1B_HUMAN	P62140	PPP1CB	PPP1CB	0.0006842	0.00102261	0.000374476	0.000561213	0.000528971	0.000617313	0.000716535
PP1G_HUMAN	P36873	PPP1CC	PPP1CC	0.000477243	0.000749912	0.000346348	0.000425168	0.000467936	0.000473996	0.00059192
NEB2_HUMAN	Q96SB3	PPP1R9B PPP1R6	PPP1R9B	3.97406e-05	0	0	0	0.000211451	0	0.000427401
PP2AA_HUMAN	P67775	PPP2CA	PPP2CA	0.000155108	0.000315304	0.00024577	0.000224756	0.000230012	0.000232229	0
2AAA_HUMAN	P30153	PPP2R1A	PPP2R1A	0.000357431	0.00023284	0.000168141	0.000256561	0.000382174	0.000228984	0.000159603
PP2BA_HUMAN	Q08209	PPP3CA CALNA CNA	PPP3CA	8.96713e-05	0.000149636	0.000166495	0.000246851	0.000267934	0.000290411	0.000136759
PP2BB_HUMAN	P16298	PPP3CB CALNA2 CALNB CNA2	PPP3CB	5.96475e-05	0.000171012	0.000187451	0.000137139	0.00010207	0.000145205	0
CANB1_HUMAN	P63098	PPP3R1 CNA2 CNB	PPP3R1	0.000124102	0	0.000582086	0.000425854	0	0.000601201	0
PP4C_HUMAN	P60510	PPP4C PPP4 PPX	PPP4C	5.04429e-05	0.000216209	0.000126396	4.62355e-05	0.000150553	9.90341e-05	9.88017e-05
PPP5_HUMAN	P53041	PPP5C PPP5	PPP5C	8.23205e-05	0.000110633	3.88057e-05	8.51707e-05	0.000250922	6.08104e-05	0.000242671
PP6R3_HUMAN	Q5H9R7	PPP6R3 C11orf23 KIAA1558 PP6R3 SAPL SAPS3	PPP6R3	0	0	4.51414e-05	0	2.30439e-05	0	0
PCP_HUMAN	P42785	PRCP PCP	PRCP	7.34221e-05	0	0	8.66916e-05	0	0	0
AAPK1_HUMAN	Q13131	PRKAA1 AMPK1	PRKAA1	2.74938e-05	0	0	0	5.88099e-05	0	0
KAPCA_HUMAN	P17612	PRKACA PKACA	PRKACA	5.73667e-05	0	0	0	0	0.000149147	5.62286e-05
KAP0_HUMAN	P10644	PRKAR1A PKR1 PRKAR1 TSE1	PRKAR1A	0.000198059	0	0	0	0.00014005	0.000237016	0.000107227
KAP2_HUMAN	P13861	PRKAR2A PKR2 PRKAR2	PRKAR2A	0.000134075	0	4.80854e-05	0.000211075	0	6.20806e-05	0
KPCA_HUMAN	P17252	PRKCA PKCA PRKACA	PRKCA	0	0	0	0.000157877	0	0	0.00016467
KPCI_HUMAN	P41743	PRKCI DXS1179E	PRKCI	0	0	0	0	3.32103e-05	0	0
KPCD1_HUMAN	Q15139	PRKD1 PKD PKD1 PRKCM	PRKD1	0	0	0	0	2.21402e-05	0	0
KGP1_HUMAN	Q13976	PRKG1 PRKG1B PRKGR1A PRKGR1B	PRKG1	0	0	0	0	1.98097e-05	0	0
PRIO_HUMAN	P04156	PRNP ALTPRP PRIP PRP	PRNP	0.000462218	0.000945912	0.000859651	0.000996816	8.06536e-05	0.00169003	0.00016467
EPCR_HUMAN	Q9UNN8	PROCR EPCR	PROCR	0.000261447	0.000560541	0.000315611	0.000782326	0	0.00163172	0
PROM1_HUMAN	O43490	PROM1 PROML1 MSTP061	PROM1	0	0	0.000296444	0	2.32815e-05	0.000117761	0
PROS_HUMAN	P07225	PROS1 PROS	PROS1	0	0	0	0.000129459	0	0	0
PRC2A_HUMAN	P48634	PRRC2A BAT2 G2	PRRC2A	1.92612e-05	1.1015e-05	9.65907e-05	2.82663e-05	0.000141349	0	2.51678e-05
PRTN3_HUMAN	P24158	PRTN3 MBN	PRTN3	0.000421061	0	0	0	0	0	0
SAP_HUMAN	P07602	PSAP GLBA SAP1	PSAP	0.000192649	0	0.000533913	0.000920725	0.000168724	0.00177251	9.93695e-05
PSD2_HUMAN	Q9BQI7	PSD2 EFA6C	PSD2	0	4.45135e-05	0	0	0	4.7961e-05	0
PSD3_HUMAN	Q9NYI0	PSD3 EFA6D EFA6R HCA67 KIAA0942	PSD3	4.04506e-05	0	0	0	0	0	0
PSN1_HUMAN	P49768	PSEN1 AD3 PS1 PSNL1	PSEN1	0	0	0	0.000152665	0	5.38812e-05	0
PTCD3_HUMAN	Q96EY7	PTCD3 MRPS39 TRG15	PTCD3	5.93958e-05	0	0	4.09682e-05	1.90574e-05	0	0
PTGIS_HUMAN	Q16647	PTGIS CYP8 CYP8A1	PTGIS	5.14503e-05	0	0	0.000321711	0	0	0
PGH2_HUMAN	P35354	PTGS2 COX2	PTGS2	0.000331519	0	0	0.00114919	0	0	0
FAK1_HUMAN	Q05397	PTK2 FAK FAK1	PTK2	1.47866e-05	0	0	0	2.53031e-05	0	0
PTK7_HUMAN	Q13308	PTK7 CCK4	PTK7	0.000504059	0.000641296	0.000721082	0.000220725	0.000197761	0.00166439	0.000361436
PTN_HUMAN	P21246	PTN HBNF1 NEGF1	PTN	0	0	0	0	0.000198097	0	0
TP4A2_HUMAN	Q12974	PTP4A2 PRL2 PTPCAAX2 BM-008	PTP4A2	9.26105e-05	0	0.000349252	0.000170341	0	0.0001503	0
PTPRB_HUMAN	P23467	PTPRB PTPB	PTPRB	0	0	0	2.60839e-05	0	0	0
PTPRD_HUMAN	P23468	PTPRD	PTPRD	3.29015e-05	0	5.56738e-05	0	0.000185566	0.000146106	3.2168e-05
PTPRF_HUMAN	P10586	PTPRF LAR	PTPRF	5.94258e-05	0.00010066	3.57336e-05	2.89103e-05	3.88753e-05	0.00022792	1.6235e-05
PTPRG_HUMAN	P23470	PTPRG PTPG	PTPRG	8.00535e-05	0	2.73077e-05	9.98916e-06	3.71737e-05	0.000123395	0
PTPRJ_HUMAN	Q12913	PTPRJ DEP1	PTPRJ	0	0	0	4.21773e-05	0	0	0
PTPRK_HUMAN	Q15262	PTPRK PTPK	PTPRK	3.818e-05	2.33559e-05	2.73077e-05	3.99566e-05	0	0.000193906	0
PTPRM_HUMAN	P28827	PTPRM PTPRL1	PTPRM	2.15665e-05	0	0	2.57595e-05	0	0	0
PTPRS_HUMAN	Q13332	PTPRS	PTPRS	3.80177e-05	1.74362e-05	0	0	3.12207e-05	0	0
PVR_HUMAN	P15151	PVR PVS	PVR	0.000418337	0.000588568	0.00105964	0.000746105	8.36408e-05	0.0016725	0.000281768
PAXI_HUMAN	P49023	PXN	PXN	9.02359e-05	7.76133e-05	6.80593e-05	2.48961e-05	0	0	0
QSOX2_HUMAN	Q6ZRP7	QSOX2 QSCN6L1 SOXN	QSOX2	6.78661e-05	0	0.000113432	0.000145227	1.93017e-05	0.000135967	2.95561e-05
RAB10_HUMAN	P61026	RAB10	RAB10	0.000946249	0	0.000927669	0.00125757	0.00032729	0.00083337	0
RB11A_HUMAN	P62491	RAB11A RAB11	RAB11A	0.000635411	0	0.000867269	0	0.000376383	0.00101917	0.000384229
RAB12_HUMAN	Q6IQ22	RAB12	RAB12	0.000173788	0	0	0	0	0	0
RAB13_HUMAN	P51153	RAB13 GIG4	RAB13	0.00058833	0	0	0.000633226	0	0	0
RAB14_HUMAN	P61106	RAB14	RAB14	0.000931014	0.000262753	0.000899889	0.00108345	0.000125461	0.000798646	9.60572e-05
RAB18_HUMAN	Q9NP72	RAB18	RAB18	0.000434936	0.000274177	0.00037901	0.000676185	0	0.000319177	0.000100234
RAB21_HUMAN	Q9UL25	RAB21 KIAA0118	RAB21	0.000245004	0.000157652	0.000360499	0	0.000125461	0.000144425	9.60572e-05
RB22A_HUMAN	Q9UL26	RAB22A RAB22	RAB22A	0.000106642	0	0	0	0	0	0
RAB23_HUMAN	Q9ULC3	RAB23 HSPC137	RAB23	0.000304128	0	0	0	0	0	0
RAB24_HUMAN	Q969Q5	RAB24	RAB24	0	0	0	0.000422151	0	0	0
RB27A_HUMAN	P51159	RAB27A RAB27	RAB27A	0.000281536	0	0	0.000194189	0	0	0
RB27B_HUMAN	O00194	RAB27B	RAB27B	0.000399905	0	0.000416289	0.000388378	0	0.000114228	0
RAB2B_HUMAN	Q8WUD1	RAB2B	RAB2B	0.000488778	0	0	0	0	0	0
RAB31_HUMAN	Q13636	RAB31 RAB22B	RAB31	0.000106642	0	0	0	0	0	0
RAB35_HUMAN	Q15286	RAB35 RAB1C RAY	RAB35	0.000484528	0	0.000384683	0.000703584	0	0.000620806	0
RAB3A_HUMAN	P20336	RAB3A	RAB3A	0.000471588	0	0	0	0	0	0
RAB3B_HUMAN	P20337	RAB3B	RAB3B	0.000375381	0	0.000176954	0.000517838	0	0	0
RAB3D_HUMAN	O95716	RAB3D GOV RAB16	RAB3D	0	0	0	0.000674268	0	0.000594939	0
RBGPR_HUMAN	Q9H2M9	RAB3GAP2 KIAA0839	RAB3GAP2	2.44957e-05	0	0	0	0	0	0
RAB44_HUMAN	Q7Z6P3	RAB44	RAB44	0	3.40869e-05	0	0	0	0	0
RAB4A_HUMAN	P20338	RAB4A RAB4	RAB4A	0.000244389	0	0.000276491	0.000809122	0	0	0
RAB4B_HUMAN	P61018	RAB4B PP1596	RAB4B	0.000244389	0	0.000276491	0.000404561	0	0	0
RAB5A_HUMAN	P20339	RAB5A RAB5	RAB5A	0.00026932	0.000105101	0.000276491	0.000337134	0	0.000118988	0
RAB5B_HUMAN	P61020	RAB5B	RAB5B	0.000232661	0	0.000460818	0.000471988	0	0.000144425	0
RAB5C_HUMAN	P51148	RAB5C RABL	RAB5C	0.000638563	0.000164506	0.000472344	0.000665446	6.5458e-05	0.000195016	0
RAB6A_HUMAN	P20340	RAB6A RAB6	RAB6A	0.000759081	0.000262753	0.000767081	0.00188795	0.000250922	0.00067125	0
RAB7A_HUMAN	P51149	RAB7A RAB7	RAB7A	0.000919977	0.000164506	0.00126427	0.00200226	9.8187e-05	0.000638133	0
RAB8A_HUMAN	P61006	RAB8A MEL RAB8	RAB8A	0.000906453	0	0.000645145	0.00161824	0	0.000713927	0
RAB8B_HUMAN	Q92930	RAB8B	RAB8B	0.0008798	0	0.000460818	0.00168567	0	0.000713927	0
RAB9A_HUMAN	P51151	RAB9A RAB9	RAB9A	0.000102006	0	0	0.000140717	0	0	0
PRAF1_HUMAN	Q9UI14	RABAC1 PRA1 PRAF1	RABAC1	8.37905e-05	0	0	0	0	0	0
PGTA_HUMAN	Q92696	RABGGTA	RABGGTA	0	0	0.000102089	0	0	0	0
PGTB2_HUMAN	P53611	RABGGTB GGTB	RABGGTB	4.75568e-05	0	0	0	0	0	0
RAC1_HUMAN	P63000	RAC1 TC25 MIG5	RAC1	0.000517692	0.000540521	0.00020134	0.000571461	0.000501845	0.000475709	0.00016467
RAC2_HUMAN	P15153	RAC2	RAC2	0.000461831	0.00030029	0.000151781	0.000559699	0	0.000330114	0
RACK1_HUMAN	P63244	RACK1 GNB2L1 HLC7 PIG21	RACK1	0.000881908	0.000432417	0.00057242	0.000398115	0.000645229	0.00116477	0.000263471
RALA_HUMAN	P11233	RALA RAL	RALA	0.000293267	0	0.000276491	0.000404561	0.000313653	0	0
RALB_HUMAN	P11234	RALB	RALB	0.000242777	0	9.61707e-05	0.000281434	0.000130916	0	0
RAP1A_HUMAN	P62834	RAP1A KREV1	RAP1A	0.00105005	0.000240232	0.000495582	0.000201169	0.00017923	0.000388255	0.00010978
RAP1B_HUMAN	P61224	RAP1B OK/SW-cl.11	RAP1B	0.00134065	0.000240232	0.00066911	0.000832647	0	0.000330114	0
RAP2A_HUMAN	P10114	RAP2A	RAP2A	0	0	0.00010533	0.000308237	0	0.000135986	0
RAP2B_HUMAN	P61225	RAP2B	RAP2B	0	0	0.00031599	0.000462355	0	0.000271972	0
RAPH1_HUMAN	Q70E73	RAPH1 ALS2CR18 ALS2CR9 KIAA1681 LPD PREL2 RMO1	RAPH1	0	0	0	3.5961e-05	0	0	0
RASA1_HUMAN	P20936	RASA1 GAP RASA	RASA1	3.53943e-05	0	0	0	0	0	0
RASA3_HUMAN	Q14644	RASA3	RASA3	4.27681e-05	0	0	0	0	0	0
RCC2_HUMAN	Q9P258	RCC2 KIAA1470 TD60	RCC2	6.83433e-05	0.000270261	0.000157995	0	0.000497364	0.000545984	0.000576343
RADI_HUMAN	P35241	RDX	RDX	0.000519471	0.000292456	0.000514756	0.00101428	0.000381838	0.00088068	0.000367523
RECK_HUMAN	O95980	RECK ST15	RECK	0.000136068	2.37965e-05	3.00699e-05	6.10658e-05	8.52189e-05	0.000484931	4.34976e-05
REG1A_HUMAN	P05451	REG1A PSPS PSPS1 REG	REG1A	6.17404e-05	0	0	0	0	0	0
RELL1_HUMAN	Q8IUW5	RELL1 PSEC0162	RELL1	6.06759e-05	0.000347922	0.000713348	0	0	0.000239048	0.000119243
REM1_HUMAN	O75628	REM1 GES REM	REM1	7.14527e-05	0	0	0	0	0	0
REPS1_HUMAN	Q96D71	REPS1	REPS1	4.04506e-05	2.89935e-05	0	0	0	0	3.97478e-05
RER1_HUMAN	O15258	RER1	RER1	0.000306017	0	0	0	0	0	0
RFTN1_HUMAN	Q14699	RFTN1 KIAA0084 MIG2	RFTN1	0.000228471	0.000360348	3.511e-05	0.000172643	0.000215076	0	0
RGMB_HUMAN	Q6NW40	RGMB	RGMB	4.90623e-05	0.000499231	0.000157209	0	4.70479e-05	0.00148735	0
RGS10_HUMAN	O43665	RGS10	RGS10	0	0	0	0.000161824	0	0	0
RHOA_HUMAN	P61586	RHOA ARH12 ARHA RHO12	RHOA	0.000720776	0	0.000289764	0.000441339	0.000581684	0.000926518	0.000157185
RHOB_HUMAN	P62745	RHOB ARH6 ARHB	RHOB	0	0	0	0	0.000171083	0	0
RHOC_HUMAN	P08134	RHOC ARH9 ARHC	RHOC	0.000694383	0	0.000100542	0.000367783	0.000479033	0.000833867	0
RHOG_HUMAN	P84095	RHOG ARHG	RHOG	0.000293829	0	0	0.000154118	0	0.000135986	0
MIRO1_HUMAN	Q8IXI2	RHOT1 ARHT1	RHOT1	2.89968e-05	0	3.11539e-05	4.55843e-05	0	0	0
MIRO2_HUMAN	Q8IXI1	RHOT2 ARHT2 C16orf39	RHOT2	2.58765e-05	0	6.50567e-05	0.000118989	0	0	0
RIC8A_HUMAN	Q9NPQ8	RIC8A	RIC8A	4.88778e-05	0	0	0	3.76383e-05	0	0
RIPL1_HUMAN	Q5EBL4	RILPL1 RLP1	RILPL1	2.49589e-05	0	0	0	0	0	0
RIMS2_HUMAN	Q9UQ26	RIMS2 KIAA0751 RAB3IP3 RIM2	RIMS2	0	2.36478e-05	0	0	0	0	0
RN114_HUMAN	Q9Y508	RNF114 ZNF228 ZNF313	RNF114	0	0	0	0	0.000202668	0	8.86682e-05
AMPB_HUMAN	Q9H4A4	RNPEP APB	RNPEP	0.000104451	0	0	0.00019951	4.12475e-05	0	3.15805e-05
ROBO1_HUMAN	Q9Y6N7	ROBO1 DUTT1	ROBO1	0.000224704	0.000236914	0.000282138	0	0.000149722	0.000509252	0.000343895
ROBO2_HUMAN	Q9HCK4	ROBO2 KIAA1568	ROBO2	0	0	2.9297e-05	0	0	3.78239e-05	0
ROCK1_HUMAN	Q13464	ROCK1	ROCK1	5.19713e-05	0	0	0	0	0	0
ROCK2_HUMAN	O75116	ROCK2 KIAA0619	ROCK2	5.10579e-05	0	0	0	1.40267e-05	0	0
ROR2_HUMAN	Q01974	ROR2 NTRKR2	ROR2	0	0	0	6.03508e-05	0	0	0
XRP2_HUMAN	O75695	RP2	RP2	8.82752e-05	0.000126122	5.52982e-05	0.000161824	5.64575e-05	0.000122351	0
RL36A_HUMAN	P83881	RPL36A RPL44 GIG15 MIG6	RPL36A	0.000538393	0	0	0.000404561	0.000501845	0	0
RL36L_HUMAN	Q969Q0	RPL36AL	RPL36AL	0.000733167	0	0	0.000539415	0.000501845	0	0
RS27A_HUMAN	P62979	RPS27A UBA80 UBCEP1	RPS27A	0.00465634	0.00714689	0.00728506	0.00973995	0.00443296	0.00645475	0.00614766
RS3_HUMAN	P23396	RPS3 OK/SW-cl.26	RPS3	0.0020579	0.00154149	0.00137808	0.00121354	0.00192374	0.0014043	0.00132346
RSSA_HUMAN	P08865	RPSA LAMBR LAMR1	RPSA	0.000828536	0.000496843	0.000873247	0.000697373	0.000980878	0.0007166	0.000733528
RRAS_HUMAN	P10301	RRAS	RRAS	0.000344526	0	9.61707e-05	0.000422151	0	0.000124161	0
RRAS2_HUMAN	P62070	RRAS2 TC21	RRAS2	0.000242649	0.000109671	0.000288512	0.000278474	0.000261832	0.000248322	0.000100234
RTN2_HUMAN	O75298	RTN2 NSPL1	RTN2	1.98825e-05	4.27531e-05	0	0	0	0	0
RTN3_HUMAN	O95197	RTN3 ASYIP NSPL2	RTN3	4.15245e-05	4.46448e-05	3.91492e-05	8.59244e-05	0	0.000101087	0
RTN4_HUMAN	Q9NQC3	RTN4 KIAA0886 NOGO My043 SP1507	RTN4	0.000192046	0.000261945	0.000322756	0.000391066	5.21146e-05	0.000101956	1.77336e-05
R4RL2_HUMAN	Q86UN3	RTN4RL2 NGRH1 NGRL3	RTN4RL2	0	0	4.80854e-05	0	0.000130916	0.000310403	0
RYR1_HUMAN	P21817	RYR1 RYDR	RYR1	0	0	0	0	0	7.21536e-06	0
RYR2_HUMAN	Q92736	RYR2	RYR2	0	6.69672e-06	0	0	0	0	0
S10AA_HUMAN	P60903	S100A10 ANX2LG CAL1L CLP11	S100A10	0.00205957	0.00160518	0.00108224	0.00212076	0	0.00311532	0
S10AD_HUMAN	Q99584	S100A13	S100A13	0.000615072	0.000229312	0.000201084	0.000588452	0.00109493	0.00025961	0.000733528
S10AE_HUMAN	Q9HCY8	S100A14 S100A15	S100A14	0.000785488	0	0	0.000404561	0.000125461	0.000713927	0.000576343
S10AG_HUMAN	Q96FQ6	S100A16 S100F AAG13	S100A16	0.000956806	0.000735709	0.000184327	0.000378304	0	0.00118988	0
S10A6_HUMAN	P06703	S100A6 CACY	S100A6	0.00144084	0.00327916	0.00190592	0.00206968	0	0.00167205	0.000461075
S10A8_HUMAN	P05109	S100A8 CAGA CFAG MRP8	S100A8	0.00259735	0.00206381	0.00316368	0.00315215	0.0022583	0.00411568	0.00398201
S10A9_HUMAN	P06702	S100A9 CAGB CFAG MRP14	S100A9	0.00240101	0.00194033	0.00187139	0.00228523	0.00179506	0.00315299	0.00319206
SCAM1_HUMAN	O15126	SCAMP1 SCAMP	SCAMP1	0.000169786	0	0.000116417	0.000425854	0	7.51502e-05	0
SCRB1_HUMAN	Q8WTV0	SCARB1 CD36L1 CLA1	SCARB1	2.88459e-05	0	0.000161036	0.00024979	3.70213e-05	0.00131082	0
SCRB2_HUMAN	Q14108	SCARB2 CD36L2 LIMP2 LIMPII	SCARB2	0.000272144	0	0.000199975	0.000509447	5.57605e-05	0.000241713	8.53842e-05
SCPDL_HUMAN	Q8NBX0	SCCPDH CGI-49	SCCPDH	6.87625e-05	5.36688e-05	0	0.000137723	0	0	4.90505e-05
SCFD1_HUMAN	Q8WVM8	SCFD1 C14orf163 KIAA0917 STXBP1L2 FKSG23	SCFD1	0.000158976	0	6.14424e-05	0.000606841	2.09102e-05	0	0
SCRIB_HUMAN	Q14160	SCRIB CRIB1 KIAA0147 LAP4 SCRB1 VARTUL	SCRIB	3.8628e-05	5.76556e-05	3.79188e-05	3.69884e-05	0.000455962	2.32953e-05	5.26942e-05
SCUB3_HUMAN	Q8IX30	SCUBE3 CEGF3	SCUBE3	8.07156e-05	0	0	0	0	0	0
SDC1_HUMAN	P18827	SDC1 SDC	SDC1	0.000110344	0	0.000898595	0	9.40959e-05	0	0
SDC2_HUMAN	P34741	SDC2 HSPG1	SDC2	0.000321537	0.000229312	0.00135139	0.000192025	0.000239517	0.000908634	0.000471554
SDC3_HUMAN	O75056	SDC3 KIAA0468	SDC3	0	0	0.00024577	0	0.000100369	0	0
SDC4_HUMAN	P31431	SDC4	SDC4	0.00028101	0.00057328	0.00110596	0.000457607	0	0	0
SDCB1_HUMAN	O00560	SDCBP MDA9 SYCL	SDCBP	0.000110528	7.8826e-05	0.000365903	0.000657412	9.40959e-05	0	0
CAB45_HUMAN	Q9BRK5	SDF4 CAB45 PSEC0034	SDF4	0.000118844	0	0.00010533	0.000154118	0	0	0
SDHB_HUMAN	P21912	SDHB SDH SDH1	SDHB	0.000211154	0.000197065	0.000235813	0.000404561	7.05719e-05	0.000127396	7.20429e-05
SDK2_HUMAN	Q58EX2	SDK2 KIAA1514	SDK2	0	0	0.000222118	0	5.66937e-05	0.000136458	5.78755e-05
SELK_HUMAN	Q9Y6D0	SELENOK SELK HSPC030 HSPC297	SELENOK	0.000267679	0.000343968	0.00100542	0	0	0.000519219	0
SELS_HUMAN	Q9BQE4	SELENOS SELS VIMP AD-015 SBBI8	SELENOS	0.000112002	0.000120116	0.00031599	0.000154118	0	0.000271972	0
SEM3C_HUMAN	Q99985	SEMA3C SEMAE	SEMA3C	1.38008e-05	0	0	0	9.74169e-05	0	0
SEM3D_HUMAN	O95025	SEMA3D UNQ760/PRO1491	SEMA3D	0	0	0	0	4.18204e-05	0	0
SEM4B_HUMAN	Q9NPR2	SEMA4B KIAA1745 SEMAC UNQ749/PRO1480	SEMA4B	2.56298e-05	2.74177e-05	4.80854e-05	0	0	0.000248322	0
SEM4C_HUMAN	Q9C0C4	SEMA4C KIAA1739 SEMAI UNQ5855/PRO34487	SEMA4C	0	2.71229e-05	0	0	1.61885e-05	0	0
SEM4D_HUMAN	Q92854	SEMA4D C9orf164 CD100 SEMAJ	SEMA4D	0	0	0	0	0	0.000118988	0
SEM6A_HUMAN	Q9H2E6	SEMA6A KIAA1368 SEMAQ	SEMA6A	0	0	9.70143e-05	0	0	0	5.05564e-05
SEM6B_HUMAN	Q9H3T3	SEMA6B SEMAN SEMAZ UNQ1907/PRO4353	SEMA6B	0	0	0	0	4.75432e-05	0	4.85342e-05
SEM7A_HUMAN	O75326	SEMA7A CD108 SEMAL	SEMA7A	0.000168848	0.000504487	0	0	0	0	0
SPS1_HUMAN	P49903	SEPHS1 SELD SPS SPS1	SEPHS1	4.09209e-05	0	5.14402e-05	0.000338702	8.7531e-05	0	0
SEPT2_HUMAN	Q15019	SEPTIN2 DIFF6 KIAA0158 NEDD5 SEPT2	SEPTIN2	0.000501563	0.000338375	0.000472815	0.000320119	0.000954729	0.000681376	0.000281143
SEPT5_HUMAN	Q99719	SEPTIN5 PNUTL1 SEPT5	SEPTIN5	0	0	0	0	0.000122543	0	0
SEPT6_HUMAN	Q14141	SEPTIN6 KIAA0128 SEP2 SEPT6	SEPTIN6	0.000152499	0	0	0	0.00045166	0	0
SEPT7_HUMAN	Q16181	SEPTIN7 CDC10 SEPT7	SEPTIN7	0.000409199	4.94595e-05	0.000211739	0.000173182	0.000797047	0.000175897	0.000203415
PAIRB_HUMAN	Q8NC51	SERBP1 PAIRBP1 CGI-55	SERBP1	0.000726015	0.000924892	0.000946903	0.000511407	0.000736039	0.00151833	0.000563536
SERC1_HUMAN	Q9NRX5	SERINC1 KIAA1253 TDE1L TDE2 UNQ396/PRO732	SERINC1	3.5192e-05	0	0.000176954	0	0	0	0
SERC3_HUMAN	Q13530	SERINC3 DIFF33 TDE1 SBBI99	SERINC3	0	0	0	6.10658e-05	0	0	0
SPA12_HUMAN	Q8IW75	SERPINA12	SERPINA12	0.000301014	0	4.70623e-05	0.000103292	0	6.07597e-05	0.000171677
IPSP_HUMAN	P05154	SERPINA5 PCI PLANH3 PROCI	SERPINA5	2.55015e-05	0	0	0	0	8.86235e-05	0
SPB12_HUMAN	Q96P63	SERPINB12	SERPINB12	0.000666053	0.000191924	0.000469507	0.000429931	6.5458e-05	0.000638464	0.000325759
PAI2_HUMAN	P05120	SERPINB2 PAI2 PLANH2	SERPINB2	6.23972e-05	0	0	0.00104852	0	0	0
SPB6_HUMAN	P35237	SERPINB6 PI6 PTI	SERPINB6	0.000211974	0.000205314	0.00015432	0.000237291	0	0.000298735	0
ANT3_HUMAN	P01008	SERPINC1 AT3 PRO0309	SERPINC1	0.000111224	0	0.000166938	3.05329e-05	0	0.000119281	0
PAI1_HUMAN	P05121	SERPINE1 PAI1 PLANH1	SERPINE1	0.000516158	0.000728703	0.000193716	0.000885972	0	0.000380761	0
GDN_HUMAN	P07093	SERPINE2 PI7 PN1	SERPINE2	0	0.000200648	0.000560324	7.35565e-05	3.42167e-05	0.00110334	0
SE6L2_HUMAN	Q6UXD5	SEZ6L2 PSK UNQ1903/PRO4349	SEZ6L2	2.40606e-05	0	0	6.60508e-05	0	2.91399e-05	0
SFRP1_HUMAN	Q8N474	SFRP1 FRP FRP1 SARP2	SFRP1	3.35162e-05	0	0	0	0	0	0
SGCB_HUMAN	Q16585	SGCB	SGCB	6.73697e-05	0.000396382	0.000369867	0	0.000107538	0.000244775	0
SGCD_HUMAN	Q92629	SGCD	SGCD	0.000202543	0.00078826	0.000333381	0.000264035	0.000211716	0.000599143	0
SGCE_HUMAN	O43556	SGCE ESG UNQ433/PRO840	SGCE	7.07382e-05	0.000201795	0.000149616	3.23649e-05	0	0.000285571	0
SGCG_HUMAN	Q13326	SGCG	SGCG	0	7.8826e-05	0	0	4.70479e-05	0	0
3BP1_HUMAN	Q9Y3L3	SH3BP1	SH3BP1	1.54351e-05	0	0	0	0	0	0
SH319_HUMAN	Q5HYK7	SH3D19	SH3D19	1.34835e-05	0	0	0	0	0	0
SH3K1_HUMAN	Q96B97	SH3KBP1 CIN85	SH3KBP1	7.24741e-05	0	0.000181802	0.000155174	0	0	0
SHC1_HUMAN	P29353	SHC1 SHC SHCA	SHC1	0	0	0	0	2.38974e-05	0	0
SHRM2_HUMAN	Q13796	SHROOM2 APXL	SHROOM2	0	0	0	5.51674e-05	0	0	0
SHRM3_HUMAN	Q8TF72	SHROOM3 KIAA1481 SHRML MSTP013	SHROOM3	1.35146e-05	0	6.11593e-05	3.72867e-05	0	5.26397e-05	0
SIDT2_HUMAN	Q8NBJ9	SIDT2 CGI-40 PSEC0072 UNQ685/PRO1325	SIDT2	0	0	0	3.44307e-05	0	0	0
SGMR1_HUMAN	Q99720	SIGMAR1 OPRS1 SRBP AAG8	SIGMAR1	0.000117307	0	0	0	0	0	0
SHPS1_HUMAN	P78324	SIRPA BIT MFR MYD1 PTPNS1 SHPS1 SIRP	SIRPA	0.000621156	0.000986042	0.000563036	0.00122168	2.73733e-05	0.000103844	0
SIRB1_HUMAN	O00241	SIRPB1	SIRPB1	0	0	0	0.000245614	0	0	0
SIR2_HUMAN	Q8IXJ6	SIRT2 SIR2L SIR2L2	SIRT2	0	0	0	7.52672e-05	7.00248e-05	0	0
S12A4_HUMAN	Q9UP95	SLC12A4 KCC1	SLC12A4	2.90843e-05	0	0	0	0	0	0
MOT1_HUMAN	P53985	SLC16A1 MCT1	SLC16A1	7.61961e-05	0	4.09616e-05	8.99024e-05	0	0.000317301	4.26921e-05
MOT4_HUMAN	O15427	SLC16A3 MCT4	SLC16A3	0.000144002	7.72173e-05	0	0.000356849	0	5.82797e-05	0
MOT2_HUMAN	O60669	SLC16A7 MCT2	SLC16A7	2.2559e-05	0	0	0	0	0	0
S17A5_HUMAN	Q9NRA2	SLC17A5	SLC17A5	3.19927e-05	0	0	0	0	0	0
AAAT_HUMAN	Q15758	SLC1A5 ASCT2 M7V1 RDR RDRC	SLC1A5	0.00029924	4.42532e-05	0.000310446	0.000406131	0	0.000551101	0
S22AI_HUMAN	Q96BI1	SLC22A18 BWR1A BWSCR1A HET IMPT1 ITM ORCTL2 SLC22A1L TSSC5	SLC22A18	0	0	0	7.19219e-05	0	0	0
S22A2_HUMAN	O15244	SLC22A2 OCT2	SLC22A2	1.86201e-05	0	0	0	0	0	0
M2OM_HUMAN	Q02978	SLC25A11 SLC20A4	SLC25A11	0.000336655	0.000185473	0.000250632	0.000259773	0.000110701	0.000101947	0
CMC2_HUMAN	Q9UJS0	SLC25A13 ARALAR2	SLC25A13	6.3409e-05	0	0.000203065	0	3.05176e-05	0.000220361	0
MPCP_HUMAN	Q00325	SLC25A3 PHC OK/SW-cl.48	SLC25A3	0.000631925	0.000567547	0.000717167	0.000812964	9.40959e-05	0.000749242	8.64515e-05
ADT1_HUMAN	P12235	SLC25A4 ANT1	SLC25A4	0.0010842	0	0.0013286	0.00103987	0	0.00112498	0
ADT2_HUMAN	P05141	SLC25A5 ANT2	SLC25A5	0.00137171	0.00133765	0.00259611	0.00160304	0.000547467	0.00310155	0.000489019
S26A8_HUMAN	Q96RN1	SLC26A8 TAT1	SLC26A8	1.07621e-05	0	0	0	0	0	0
S29A1_HUMAN	Q99808	SLC29A1 ENT1	SLC29A1	0	0	0	0	3.01107e-05	0	0
GTR1_HUMAN	P11166	SLC2A1 GLUT1	SLC2A1	7.07652e-05	9.34234e-05	0.000327693	0.00011987	0	5.28834e-05	0
GTR3_HUMAN	P11169	SLC2A3 GLUT3	SLC2A3	0	0	0	0.000209772	0	5.28834e-05	0
ZNT1_HUMAN	Q9Y6M5	SLC30A1 ZNT1	SLC30A1	0	0	0	0	0	0.000103844	0
ACATN_HUMAN	O00400	SLC33A1 ACATN AT1	SLC33A1	1.92306e-05	0	0	0.000106114	0	0	0
NPT2C_HUMAN	Q8N130	SLC34A3 NPT2C NPTIIC	SLC34A3	1.83292e-05	0	0	0	0	0	0
S38A2_HUMAN	Q96QD8	SLC38A2 ATA2 KIAA1382 SAT2 SNAT2	SLC38A2	0	0	7.89974e-05	0.000231178	0	0	0
S38A4_HUMAN	Q969I6	SLC38A4 ATA3 NAT3 SNAT4	SLC38A4	0	0	0	0	0	0.000280889	0
S39AA_HUMAN	Q9ULF5	SLC39A10 KIAA1265 ZIP10	SLC39A10	9.08841e-05	0.000281761	0.000244301	4.49421e-05	0.000376383	0.000160541	4.90505e-05
S39AE_HUMAN	Q15043	SLC39A14 KIAA0062 ZIP14	SLC39A14	0.000120026	0.000303626	0.000154181	0.000235958	0	0.000423068	0
S39A6_HUMAN	Q13433	SLC39A6 LIV1 ZIP6	SLC39A6	2.07012e-05	0.000163216	0.000208181	1.90382e-05	0.000177122	0.000167983	0
4F2_HUMAN	P08195	SLC3A2 MDU1	SLC3A2	0.000636317	0.000927365	0.00111642	0.00162528	0.000332103	0.00249844	0.000288172
CTL1_HUMAN	Q8WWI5	SLC44A1 CD92 CDW92 CTL1	SLC44A1	0.000338751	0.000276431	0.000311898	0.00045316	2.06238e-05	0.00111766	6.31609e-05
CTL2_HUMAN	Q8IWA5	SLC44A2 CTL2 PSEC0210	SLC44A2	0.000209838	0.0010878	0.000620434	0.000750578	0.000301107	0.00230222	0.000489892
NADAP_HUMAN	Q9BWU0	SLC4A1AP HLC3	SLC4A1AP	0	0	9.94125e-05	3.6365e-05	1.69161e-05	0	0
S4A7_HUMAN	Q9Y6M7	SLC4A7 BT NBC2 NBC2B NBC3 NBCn1 SBC2 SLC4A6	SLC4A7	1.94725e-05	2.78209e-05	3.25283e-05	0	0	0	0
SC5A6_HUMAN	Q9Y289	SLC5A6 SMVT	SLC5A6	0	0	0.000128228	0	0	0.000165548	0
SL7A1_HUMAN	P30825	SLC7A1 ATRC1 ERR REC1L	SLC7A1	7.76294e-05	0	9.7585e-05	0.000142786	0	0	0
CTR2_HUMAN	P52569	SLC7A2 ATRC2 CAT2	SLC7A2	0	0	3.07212e-05	0.000134854	0	0	0
LAT1_HUMAN	Q01650	SLC7A5 CD98LC LAT1 MPE16	SLC7A5	8.54749e-05	0.000160518	8.04337e-05	0.000252108	0	0.000133474	0
YLAT2_HUMAN	Q92536	SLC7A6 KIAA0245	SLC7A6	3.08702e-05	0	0	0	0	0	0
SL9A1_HUMAN	P19634	SLC9A1 APNH1 NHE1	SLC9A1	0	0	4.86138e-05	0	0	0	0
SL9A3_HUMAN	P48764	SLC9A3 NHE3	SLC9A3	1.26136e-05	0	0	0	0	0	0
NHRF1_HUMAN	O14745	SLC9A3R1 NHERF NHERF1	SLC9A3R1	0	6.46778e-05	0.000510445	0.000912855	9.65086e-05	0.000188233	0
NHRF2_HUMAN	Q15599	SLC9A3R2 NHERF2	SLC9A3R2	7.14947e-05	0.000715825	0.000145928	0	6.10352e-05	0	0
SL9A7_HUMAN	Q96T83	SLC9A7 NHE7	SLC9A7	3.66583e-05	0	0	0	0	0	0
SLIT2_HUMAN	O94813	SLIT2 SLIL3	SLIT2	0	0	0	0	4.42804e-05	0	0
SLIK4_HUMAN	Q8IW52	SLITRK4	SLITRK4	3.76267e-05	0	0	0	0	0	0
SLIK5_HUMAN	O94991	SLITRK5 KIAA0918 LRRC11	SLITRK5	0	0	0	0	2.11056e-05	0	0
SLIK6_HUMAN	Q9H5Y7	SLITRK6	SLITRK6	0	0	0	0	3.96193e-05	0	0
SMAD3_HUMAN	P84022	SMAD3 MADH3	SMAD3	6.73299e-05	0	0	0	0	0	0
SMAP1_HUMAN	Q8IYB5	SMAP1	SMAP1	4.71588e-05	5.04487e-05	0	0	0	0	0
ASM_HUMAN	P17405	SMPD1 ASM	SMPD1	3.35162e-05	0	3.1599e-05	0.000115589	0	0	0
ASM3B_HUMAN	Q92485	SMPDL3B ASML3B ASMLPD	SMPDL3B	0	0	4.33711e-05	0	0	0.000279971	0
SMUF2_HUMAN	Q9HAU4	SMURF2	SMURF2	2.72806e-05	0	0	0	0	0	0
SNP23_HUMAN	O00161	SNAP23	SNAP23	0.000447944	0.00060319	0.000961707	0.000876521	0.000523664	0.00185342	0.000751752
SNP25_HUMAN	P60880	SNAP25 SNAP	SNAP25	0	0	0	0.000492509	0	0	0
SNP29_HUMAN	O95721	SNAP29	SNAP29	6.06759e-05	0	7.62733e-05	0.000446412	7.78724e-05	0	0
SYUA_HUMAN	P37840	SNCA NACP PARK1	SNCA	0	0	0.00031599	0	0	0	0
SNF8_HUMAN	Q96H20	SNF8 EAP30	SNF8	0	0	0	0	5.1915e-05	0	0
SNTB1_HUMAN	Q13884	SNTB1 SNT2B1	SNTB1	6.58849e-05	0.000391412	7.40236e-05	2.79008e-05	0.00020766	0	0
SNTB2_HUMAN	Q13425	SNTB2 D16S2531E SNT2B2 SNTL	SNTB2	0.000106437	0.000108726	3.81367e-05	0.000111603	0.00010383	0	0
SNX18_HUMAN	Q96RF0	SNX18 SH3PXD3B SNAG1	SNX18	3.40875e-05	0	0	0	2.18193e-05	0	0
SNX27_HUMAN	Q96L92	SNX27 KIAA0488 My014	SNX27	3.84612e-05	0.000124054	0	0	2.46809e-05	0	0
SNX4_HUMAN	O95219	SNX4	SNX4	2.2559e-05	0	0	0	0	0	0
SNX5_HUMAN	Q9Y5X3	SNX5	SNX5	2.49589e-05	0	0	0	0	0	0
SNX9_HUMAN	Q9Y5X1	SNX9 SH3PX1 SH3PXD3A	SNX9	0.000114069	7.52965e-05	0	0	0	0	0
SRBS1_HUMAN	Q9BX66	SORBS1 KIAA0894 KIAA1296 SH3D5	SORBS1	1.23049e-05	0	0	0	0	0	0
SORC2_HUMAN	Q96PQ0	SORCS2 KIAA1329	SORCS2	5.52642e-05	0	3.45614e-05	0	0	2.23102e-05	0
SORT_HUMAN	Q99523	SORT1	SORT1	0	0.00012338	0.000120213	8.10983e-05	1.63645e-05	0.000172915	5.01168e-05
SPART_HUMAN	Q8N0X7	SPART KIAA0610 SPG20 TAHCCP1	SPART	5.62429e-05	0	9.09011e-05	0.000133006	5.15594e-05	5.58449e-05	3.15805e-05
SPTCS_HUMAN	Q96JI7	SPG11 KIAA1840	SPG11	1.26771e-05	0	0	0	0	0	0
SPIT1_HUMAN	O43278	SPINT1 HAI1 UNQ223/PRO256	SPINT1	0	0	0	8.37023e-05	0	0	0
LEUK_HUMAN	P16150	SPN CD43	SPN	0	0	0.000276491	0	0	0	0
SPR1B_HUMAN	P22528	SPRR1B	SPRR1B	0.000707382	0	0.000442385	0.000323649	0	0.00114228	0.000461075
SPR2D_HUMAN	P22532	SPRR2D	SPRR2D	0.00338954	0	0	0	0	0	0
SPR2E_HUMAN	P22531	SPRR2E	SPRR2E	0.00353691	0	0	0	0	0	0
SPR2G_HUMAN	Q9BYE4	SPRR2G	SPRR2G	0.0030948	0	0	0	0	0	0
SPRR3_HUMAN	Q9UBC9	SPRR3 SPRC	SPRR3	0.000261993	0	0	0	0	0	0
SPY1_HUMAN	O43609	SPRY1	SPRY1	0	0	0	0	8.60305e-05	0	0
SPY2_HUMAN	O43597	SPRY2	SPRY2	0	0	0.000122668	0	0	0.000163183	0
SPY4_HUMAN	Q9C004	SPRY4	SPRY4	0	0	0.000126148	0	0.000114056	0	0
SPTB2_HUMAN	Q01082	SPTBN1 SPTB2	SPTBN1	0.000394509	0.000522831	0.000424367	0.00057307	0.00144531	0.000659681	0.000645505
SPTN2_HUMAN	O15020	SPTBN2 KIAA0302 SCA5	SPTBN2	3.57877e-05	4.65393e-05	3.8403e-05	7.79439e-05	0.00035555	5.26509e-05	8.50691e-05
SPTN4_HUMAN	Q9H254	SPTBN4 KIAA1642 SPTBN3	SPTBN4	1.72816e-05	1.74563e-05	2.22839e-05	1.74176e-05	0	1.19937e-05	0
SRA1_HUMAN	Q9HD15	SRA1 PP7684	SRA1	4.5118e-05	0	0	0	5.79051e-05	0	0
SRC_HUMAN	P12931	SRC SRC1	SRC	5.89485e-05	0.000168162	7.37309e-05	8.09122e-05	0.000250922	0.000169862	9.60572e-05
SRGP2_HUMAN	O75044	SRGAP2 ARHGAP34 FNBP2 KIAA0456 SRGAP2A	SRGAP2	0	0	0	0	1.86636e-05	0	0
SORCN_HUMAN	P30626	SRI	SRI	0.000227152	0	0.000301626	0.000294226	0.000171083	0.000277956	0.000733528
SRPK1_HUMAN	Q96SB4	SRPK1	SRPK1	2.37784e-05	0	0	0	0	0	0
STABP_HUMAN	O95630	STAMBP AMSH	STAMBP	0	0	0	6.74268e-05	6.27306e-05	0	0
STAT3_HUMAN	P40763	STAT3 APRF	STAT3	4.66561e-05	0	0	0	0	0	0
STAU1_HUMAN	O95793	STAU1 STAU	STAU1	0.000102411	0	0	0	0.000227025	0	5.48898e-05
STC1_HUMAN	P52823	STC1 STC	STC1	8.42121e-05	0	0	0	0	0	0
STEA3_HUMAN	Q658P3	STEAP3 TSAP6	STEAP3	7.46497e-05	0	0	0	0	0	0
STIM1_HUMAN	Q13586	STIM1 GOK	STIM1	8.37905e-05	0	0	0	0	0	0
STK10_HUMAN	O94804	STK10 LOK	STK10	5.23691e-05	0	0	0	0	0	0
STK26_HUMAN	Q9P289	STK26 MASK MST4	STK26	6.23972e-05	0	0	0	0.000176179	0	9.8101e-05
STOM_HUMAN	P27105	STOM BND7 EPB72	STOM	0.000192825	7.8826e-05	0.000331342	0.000353991	0.000329336	0.000254793	0
STML2_HUMAN	Q9UJZ1	STOML2 SLP2 HSPC108	STOML2	0.000301013	0.000161694	0.000331932	0	0.00011581	0.000193407	0
STRN_HUMAN	O43815	STRN	STRN	0	0	0	0	4.37655e-05	0	0
STRN3_HUMAN	Q13033	STRN3 GS2NA SG2NA	STRN3	6.74176e-05	0	0	0	4.32625e-05	0	3.97478e-05
STS_HUMAN	P08842	STS ARSC1	STS	0	0	0	0.00012448	0	0	0
STX2_HUMAN	P32856	STX2 EPIM STX2A STX2B STX2C	STX2	7.14527e-05	0	0	0.000147113	0	0	0
STX3_HUMAN	Q13277	STX3 STX3A	STX3	0	0	0.000268112	4.90377e-05	0	0	0
STX4_HUMAN	Q12846	STX4 STX4A	STX4	8.62549e-05	0.000111284	6.50567e-05	9.51908e-05	6.64206e-05	0	0
STX6_HUMAN	O43752	STX6	STX6	4.04506e-05	0	0.00022882	0.000223206	0	0	0
STX7_HUMAN	O15400	STX7	STX7	0.000244979	0.000294284	0.000368655	0.00047497	7.52767e-05	0.00011554	0
STX8_HUMAN	Q9UNK0	STX8	STX8	0.000218328	9.34234e-05	0.000163846	0	5.57605e-05	0	0
STXB1_HUMAN	P61764	STXBP1 UNC18A	STXBP1	6.90039e-05	0	0	0	0	0	0
STXB2_HUMAN	Q15833	STXBP2 UNC18B	STXBP2	0	0	0	4.90377e-05	0	0	0
STXB3_HUMAN	O00186	STXBP3	STXBP3	2.58765e-05	0	3.25283e-05	9.51908e-05	0	0.000167983	0
STXB5_HUMAN	Q5T5C0	STXBP5 LLGL3	STXBP5	9.16458e-06	0	0	0	0	0	0
SUCA_HUMAN	P53597	SUCLG1	SUCLG1	0.000146879	0	0.000173454	0.000224756	0.000167282	0.000113241	0
SUCB2_HUMAN	Q96I99	SUCLG2	SUCLG2	0.000231184	0	4.70623e-05	0.00113621	0.000112114	0	0
SULF1_HUMAN	Q8IWU6	SULF1 KIAA1077	SULF1	4.06508e-05	0	0	0	2.98126e-05	0	0
SULF2_HUMAN	Q8IWU5	SULF2 KIAA1247 UNQ559/PRO1120	SULF2	0	0	0	0	3.01107e-05	0	0
SUMO1_HUMAN	P63165	SUMO1 SMT3C SMT3H3 UBL1 OK/SW-cl.43	SUMO1	0.000195511	0	0.000184327	0.000674268	0.000188192	0.000237976	0
SURF4_HUMAN	O15260	SURF4 SURF-4	SURF4	0.000597981	0	7.37309e-05	0.000539415	0	9.51902e-05	0
SUSD2_HUMAN	Q9UGT4	SUSD2	SUSD2	0.000127443	0.000826797	0	0	0	0	0
SVIL_HUMAN	O95425	SVIL	SVIL	1.42617e-05	0	0	0	9.10605e-05	0	5.11272e-05
SVIP_HUMAN	Q8NHG7	SVIP	SVIP	0	0	0.000552982	0	0.000188192	0.000713927	0
SWP70_HUMAN	Q9UH65	SWAP70 KIAA0640 HSPC321	SWAP70	2.55015e-05	0	0	0	0	0	0
SYAP1_HUMAN	Q96A49	SYAP1 PRO3113	SYAP1	0.000146633	0	0.000165895	8.09122e-05	0	0	0
SYMPK_HUMAN	Q92797	SYMPK SPK	SYMPK	1.24794e-05	0	0	0	0	0	0
SYNE1_HUMAN	Q8NF91	SYNE1 C6orf98 KIAA0796 KIAA1262 KIAA1756 MYNE1	SYNE1	2.32061e-06	8.73246e-06	6.56358e-06	4.80191e-06	0	0	0
SYNE2_HUMAN	Q8WXH0	SYNE2 KIAA1011 NUA	SYNE2	0	0	5.22976e-06	0	0	7.17514e-06	0
SYGP1_HUMAN	Q96PV0	SYNGAP1 KIAA1938	SYNGAP1	0	0	0	4.28165e-05	0	0	0
SNG1_HUMAN	O43759	SYNGR1	SYNGR1	4.69227e-05	0	0	0.000129459	0	0	0
SYJ2B_HUMAN	P57105	SYNJ2BP OMP25	SYNJ2BP	0.000293267	0	0.000414736	0.000809122	0	0.000356963	0
SYPL1_HUMAN	Q16563	SYPL1 SYPL	SYPL1	0	0.000304432	0.000381367	0.000446412	0	0.000689308	0
SYTL2_HUMAN	Q9HCH5	SYTL2 KIAA1597 SGA72M SLP2 SLP2A	SYTL2	0	0	0	0	4.30153e-05	0	0
TAB2_HUMAN	Q9NYJ8	TAB2 KIAA0733 MAP3K7IP2	TAB2	0	0	0	0	1.98097e-05	0	0
TACC2_HUMAN	O95359	TACC2	TACC2	0	0	4.295e-05	5.23703e-06	0	0	0
TANC1_HUMAN	Q9C0D5	TANC1 KIAA1728	TANC1	0	0	0	0	7.45314e-06	0	0
TAOK3_HUMAN	Q9H2K8	TAOK3 DPK JIK KDS MAP3K18	TAOK3	0	0	0	4.62355e-05	0	0	0
TX1B3_HUMAN	O14907	TAX1BP3 TIP1	TAX1BP3	8.37905e-05	0	0	0.000231178	0	0	0
TB10B_HUMAN	Q4KMP7	TBC1D10B FP2461	TBC1D10B	2.02253e-05	0	0	0	0	0	0
TBC24_HUMAN	Q9ULP9	TBC1D24 KIAA1171	TBC1D24	0	0	0	0	0.000191179	0	0
TBCD_HUMAN	Q9BTW9	TBCD KIAA0988 SSD1 TFCD PP1096	TBCD	1.76401e-05	0	0	0	1.13198e-05	0	0
TCAF1_HUMAN	Q9Y4C2	TCAF1 FAM115A KIAA0738	TCAF1	0	0	0	0	1.47601e-05	0	0
TCAF2_HUMAN	A6NFQ2	TCAF2 FAM115C FAM139A	TCAF2	0	0	0	0	0.000171422	0	0
TRHY_HUMAN	Q07283	TCHH THH THL TRHY	TCHH	1.85665e-05	0	8.70837e-06	1.27421e-05	0	0	0
VPP3_HUMAN	Q13488	TCIRG1 ATP6N1C ATP6V0A3	TCIRG1	6.31316e-05	0	0	8.70024e-05	0	0	0
TYDP1_HUMAN	Q9NUW8	TDP1	TDP1	0	0	0	0	0.000177122	0	0
TIE2_HUMAN	Q02763	TEK TIE2 VMCM VMCM1	TEK	0	0	0	0	0	4.53287e-05	0
TEN1_HUMAN	Q9UKZ4	TENM1 ODZ1 TNM1	TENM1	0	8.27027e-06	2.04732e-05	2.07765e-05	0	0	0
TEN2_HUMAN	Q9NT68	TENM2 KIAA1127 ODZ2 TNM2	TENM2	0	0	0	0	0	0	0
TEN3_HUMAN	Q9P273	TENM3 KIAA1455 ODZ3 TNM3	TENM3	0.000117505	7.12315e-05	5.14402e-05	0	5.00177e-06	0.000199235	3.82952e-05
TEN4_HUMAN	Q6N022	TENM4 KIAA1302 ODZ4 TNM4	TENM4	0.000133974	2.45691e-05	0	5.25404e-06	2.19964e-05	1.85435e-05	0
TES_HUMAN	Q9UGI8	TES	TES	3.67813e-05	0.000131377	0	0	0	0	0
TRFE_HUMAN	P02787	TF PRO1400	TF	0.000164501	0	2.87263e-05	8.63886e-05	0	0.000198606	0.000194609
TFPI1_HUMAN	P10646	TFPI LACI TFPI1	TFPI	0	7.20695e-05	0.000126396	4.62355e-05	0	0.000407958	0
TFR1_HUMAN	P02786	TFRC	TFRC	0.000955067	0.00344238	0.00450316	0.0019843	0.000531365	0.00459696	0.00161376
TGFB1_HUMAN	P01137	TGFB1 TGFB	TGFB1	0.000428716	0.000630608	5.02711e-05	0	0	0.000649024	0
TGFI1_HUMAN	O43294	TGFB1I1 ARA55	TGFB1I1	3.5192e-05	5.04487e-05	0	0	0	0	0
BGH3_HUMAN	Q15582	TGFBI BIGH3	TGFBI	0.00031388	0.000319508	0	9.52795e-05	0.000321181	7.61522e-05	3.07383e-05
TGFR2_HUMAN	P37173	TGFBR2	TGFBR2	5.88804e-05	0.000135823	0	0	0	0.000263604	0
TGBR3_HUMAN	Q03167	TGFBR3	TGFBR3	0.000106515	6.7086e-05	0	0	0	0	0
TGM1_HUMAN	P22735	TGM1 KTG	TGM1	0.000576385	0	9.83079e-05	5.39415e-05	1.67282e-05	0.00012692	0.000192114
TGM2_HUMAN	P21980	TGM2	TGM2	0.000682478	0.000180174	0	5.48644e-05	0	0	0
TGM3_HUMAN	Q08188	TGM3	TGM3	0.000650577	0.000180174	0.000335396	0.000322214	6.84334e-05	0.000339026	0.000628738
TGON2_HUMAN	O43493	TGOLN2 TGN46 TGN51	TGOLN2	0.00014974	7.41892e-05	0.00039034	0.000380763	4.42804e-05	0.000335965	9.04068e-05
TRBM_HUMAN	P07204	THBD THRM	THBD	9.82475e-05	0.000105101	0	0	0	0	0
TSP1_HUMAN	P07996	THBS1 TSP TSP1	THBS1	0.000159297	0.000254199	6.85869e-05	0.000112901	0	0	0
THY1_HUMAN	P04216	THY1	THY1	0.000539295	0.000840811	0.000411974	0.00105992	0	0.00142785	0
TJAP1_HUMAN	Q5JTD0	TJAP1 PILT TJP4	TJAP1	0	0	0	0	3.64242e-05	0	0
ZO1_HUMAN	Q07157	TJP1 ZO1	TJP1	8.14242e-05	0.000109952	4.53729e-05	5.80908e-05	4.24638e-05	0	0.000200981
ZO2_HUMAN	Q9UDY2	TJP2 X104 ZO2	TJP2	1.31313e-05	0	0	0	0	0	0
TLC3A_HUMAN	Q8TBR7	TLCD3A FAM57A	TLCD3A	4.04506e-05	0	0	0	0	0	0
TLN1_HUMAN	Q9Y490	TLN1 KIAA1027 TLN	TLN1	0.000421081	0.000126122	3.61405e-05	9.38791e-05	0.000276015	0.000143439	0.000234807
TLN2_HUMAN	Q9Y4G6	TLN2 KIAA0320	TLN2	7.5473e-05	0	2.43963e-05	0	4.70479e-05	0	4.6616e-05
TLR9_HUMAN	Q9NR96	TLR9 UNQ5798/PRO19605	TLR9	0	2.17451e-05	0	0	0	0	0
TM9S2_HUMAN	Q99805	TM9SF2	TM9SF2	5.40228e-05	0	0	8.51707e-05	0	0	0
LFG3_HUMAN	Q969X1	TMBIM1 LFG3 RECS1 PP1201 PSEC0158	TMBIM1	0	0	0.00011894	4.62355e-05	0	0.000244775	0
BI1_HUMAN	P55061	TMBIM6 BI1 TEGT	TMBIM6	0	0	8.19232e-05	0.00035961	0	0.000105767	0
TMED1_HUMAN	Q13445	TMED1 IL1RL1L IL1RL1LG	TMED1	0.000117307	0	0	0	6.02214e-05	0	0
TMEDA_HUMAN	P49755	TMED10 TMP21	TMED10	0.000763438	0	0.00034086	0.000647297	9.0332e-05	0	0
TM108_HUMAN	Q6UXF1	TMEM108 KIAA1690 RTLN UNQ1875/PRO4318	TMEM108	0	0	0.000110596	0	0	4.75951e-05	0
TMM11_HUMAN	P17152	TMEM11 C17orf35 PM1	TMEM11	5.33212e-05	0	0.000201084	0	0	0	0
TM119_HUMAN	Q4V9L6	TMEM119 PSEC0199 UNQ731/PRO1415	TMEM119	0.000802766	0.00160914	0.00168016	0	0.000493192	0.000295243	0
T179B_HUMAN	Q7Z7N9	TMEM179B	TMEM179B	0	0	0	0.00020228	0	0	0
CC50A_HUMAN	Q9NV96	TMEM30A C6orf67 CDC50A	TMEM30A	0.000150498	0.000123045	0.000107899	0.000206076	3.67203e-05	0.000208954	0
TMM59_HUMAN	Q9BXS4	TMEM59 C1orf8 HSPC001 UNQ169/PRO195	TMEM59	0	0	0.000231272	0	0	0	0
TMM65_HUMAN	Q6PI78	TMEM65	TMEM65	0.000140768	0	0	0	0	0	0
SGMR2_HUMAN	Q5BJF2	TMEM97 MAC30 S2R	TMEM97	0	0	0	0	0	0.000194128	0
TMUB1_HUMAN	Q9BVT8	TMUB1 C7orf21 DULP HOPS SB144 UNQ763/PRO1555	TMUB1	7.91835e-05	0	0.000255222	0.00012448	0	0.000109835	0
TMX3_HUMAN	Q96JJ7	TMX3 KIAA1830 TXNDC10	TMX3	0.000231797	0.000145525	0.000206412	0.000529041	0	0.000274587	0.000110835
TR10A_HUMAN	O00220	TNFRSF10A APO2 DR4 TRAILR1	TNFRSF10A	0	0.00017657	8.32578e-05	9.07929e-05	0	5.71141e-05	0
TR10B_HUMAN	O14763	TNFRSF10B DR5 KILLER TRAILR2 TRICK2 ZTNFR9 UNQ160/PRO186	TNFRSF10B	0.000325107	0.000893362	0.000960857	0.000662032	0.000156826	0.00159771	0.000240143
TR10D_HUMAN	Q9UBN6	TNFRSF10D DCR2 TRAILR4 TRUNDD UNQ251/PRO288	TNFRSF10D	0.00037148	0.000630608	0	0.000905262	0	0.000271972	0
TR11B_HUMAN	O00300	TNFRSF11B OCIF OPG	TNFRSF11B	5.10029e-05	0	0	0	0	0	0
TNR12_HUMAN	Q9NP84	TNFRSF12A FN14	TNFRSF12A	0.000125686	0.000720695	0.00031599	0	0	0.000203979	0
TNR1A_HUMAN	P19438	TNFRSF1A TNFAR TNFR1	TNFRSF1A	0	7.5673e-05	0	0	0	0.000342685	0
TNR1B_HUMAN	P20333	TNFRSF1B TNFBR TNFR2	TNFRSF1B	0	0	0.000230409	0	0	0.000416457	0
TNR21_HUMAN	O75509	TNFRSF21 DR6 UNQ437/PRO868	TNFRSF21	0	0	3.07212e-05	2.24756e-05	0	0.000436288	0
TNR8_HUMAN	P28908	TNFRSF8 CD30 D1S166E	TNFRSF8	0	0	0.000195135	0	0	0.00111551	0
TNFL4_HUMAN	P23510	TNFSF4 TXGP1	TNFSF4	0	0.000180174	0	0.000704093	0	0	0
TNIK_HUMAN	Q9UKE5	TNIK KIAA0551	TNIK	3.80313e-05	0	0	0	6.31353e-05	0	0
TOLIP_HUMAN	Q9H0E2	TOLLIP	TOLLIP	0.000127476	0.000168162	0.000140938	0.000275672	0.000125461	0.000135889	0
TOM1_HUMAN	O60784	TOM1	TOM1	7.62507e-05	0.000186847	0	0.000149837	2.78803e-05	0	0
TPBG_HUMAN	Q13641	TPBG 5T4	TPBG	0.000761684	0.00060319	0.000803268	0.000929671	0.000212738	0.00108169	0.000425993
TPM1_HUMAN	P09493	TPM1 C15orf13 TMSA	TPM1	0.00383763	0.00565636	0.00277347	0.00568202	0.00187051	0.00122359	0.00101297
TRHDE_HUMAN	Q9UKU6	TRHDE UNQ2507/PRO5995	TRHDE	3.50917e-05	3.23389e-05	0	0	0	0	0
TRI72_HUMAN	Q6ZMU5	TRIM72 MG53	TRIM72	0	0.000809082	0.000481118	0	0.00291165	0.000238467	0.000761208
CIP4_HUMAN	Q15642	TRIP10 CIP4 STOT STP	TRIP10	4.31275e-05	0	0	0	0	0	0
TRIP6_HUMAN	Q15654	TRIP6 OIP1	TRIP6	2.34613e-05	0.000126122	0	0	4.5166e-05	0	4.61075e-05
TRPM2_HUMAN	O94759	TRPM2 EREG1 KNP3 LTRPC2 TRPC7	TRPM2	0	0	0	0	0	0	2.02226e-05
TRPV2_HUMAN	Q9Y5S1	TRPV2 VRL	TRPV2	9.54822e-05	4.39959e-05	0	0	0	0	0
TS101_HUMAN	Q99816	TSG101	TSG101	6.68528e-05	0.00014332	0.000147848	0	0.00010265	0.000185304	0.000130987
TSN14_HUMAN	Q8NG11	TSPAN14 TM4SF14	TSPAN14	0.000113903	0	0.000142705	0.000156604	0	0.000111813	7.43669e-05
TSN3_HUMAN	O60637	TSPAN3 TM4SF8	TSPAN3	0	0	0.000232332	0.00052015	0.000161307	0.000305969	0
TSN4_HUMAN	O14817	TSPAN4 NAG2 TM4SF7	TSPAN4	0	9.70166e-05	8.50741e-05	0.00012448	0	0.000109835	0
TSN5_HUMAN	P62079	TSPAN5 TM4SF9	TSPAN5	0.000117897	0	0	0	0	0	0
TSN6_HUMAN	O43657	TSPAN6 TM4SF6 UNQ767/PRO1560	TSPAN6	0	0	0.000157995	0.000115589	0	0	0
TSN7_HUMAN	P41732	TSPAN7 A15 DXS1692E MXS1 TM4SF2	TSPAN7	0	0	0	0	0.000134423	0	0
TTC7B_HUMAN	Q86TV6	TTC7B TTC7L1	TTC7B	0	0	0	0	7.20734e-05	0	0
TTYH2_HUMAN	Q9BSA4	TTYH2 C17orf29	TTYH2	0	0	7.49806e-05	0	0	0	0
TTYH3_HUMAN	Q9C0H2	TTYH3 KIAA1691	TTYH3	4.04506e-05	6.52353e-05	0.000263582	8.37023e-05	0.000298511	0.000488796	7.94956e-05
TULP3_HUMAN	O75386	TULP3 TUBL3	TULP3	0	0	0	0	0.000105387	0	0
TUSC3_HUMAN	Q13454	TUSC3 N33	TUSC3	2.93267e-05	0	0	0	0	0	0
UAP1_HUMAN	Q16222	UAP1 SPAG2	UAP1	7.963e-05	0	0	0.000301706	0	0	0
RL40_HUMAN	P62987	UBA52 UBCEP2	UBA52	0.00477047	0	0.0110596	0.00787545	0	0.0127555	0
UBB_HUMAN	P0CG47	UBB	UBB	0.00314467	0.00504487	0.00579209	0.00580577	0	0.00585888	0
UBE2C_HUMAN	O00762	UBE2C UBCH10	UBE2C	0.000117897	0	0.000221193	0	0.000112915	0.000316095	0.000115269
UB2D3_HUMAN	P61077	UBE2D3 UBC5C UBCH5C	UBE2D3	0.000241514	0	0.000130113	0.000380763	0.000309963	0.000347836	0
UBQL1_HUMAN	Q9UMX0	UBQLN1 DA41 PLIC1	UBQLN1	0.000102411	0	0.0003511	0	3.5846e-05	0.000226643	5.48898e-05
UBQL2_HUMAN	Q9UHD9	UBQLN2 N4BP4 PLIC2 HRIHFB2157	UBQLN2	4.89672e-05	0	0.000134056	0	4.56222e-05	0.000129805	0
ULBP2_HUMAN	Q9BZM5	ULBP2 N2DL2 RAET1H UNQ463/PRO791	ULBP2	0	0	0.000163846	0.00011987	0	0.000105767	0
ULBP3_HUMAN	Q9BZM4	ULBP3 N2DL3 RAET1N	ULBP3	8.42121e-05	9.00869e-05	0.000157995	0	0	0.000407958	0
UROM_HUMAN	P07911	UMOD	UMOD	0.000553017	0.00189182	0.00148675	0.00123719	0	0.00142684	0
UN13A_HUMAN	Q9UPW8	UNC13A KIAA1032	UNC13A	0	0	0	0	0	0	1.19449e-05
UNC5B_HUMAN	Q8IZJ1	UNC5B P53RDL1 UNC5H2 UNQ1883/PRO4326	UNC5B	6.80175e-05	4.85083e-05	0	0	0	0	0
UNC5C_HUMAN	O95185	UNC5C UNC5H3	UNC5C	0	0	0	0	0	0.00041588	0
UCRI_HUMAN	P47985	UQCRFS1	UQCRFS1	0.000293267	0	0.000429337	0.000647297	7.52767e-05	0.000285571	0
UCRIL_HUMAN	P0C7P4	UQCRFS1P1 UQCRFSL1	UQCRFS1P1	0.000283806	0	0.000335717	0	0	0	0
UBP14_HUMAN	P54578	USP14 TGT	USP14	8.38959e-05	0	7.89974e-05	0.000491253	0.000161307	0.000109197	0.000329339
UTRO_HUMAN	P46939	UTRN DMDL DRP1	UTRN	4.6216e-05	2.56085e-05	0	5.33938e-05	0.000103171	0	0
VAMP2_HUMAN	P63027	VAMP2 SYB2	VAMP2	0.00045118	0.000970166	0.00136119	0.000660404	0	0.0021967	0
VAMP3_HUMAN	Q15836	VAMP3 SYB3	VAMP3	0.000936073	0.000687936	0.00127146	0.00161824	0	0.00181727	0
VAMP4_HUMAN	O75379	VAMP4	VAMP4	0.000109975	0	0	0.00020228	0	0.000178482	0
VAMP5_HUMAN	O95183	VAMP5 HSPC191	VAMP5	9.02359e-05	0.000776133	0	0.000497921	0	0.000439339	0
VAMP7_HUMAN	P51809	VAMP7 SYBL1	VAMP7	0	0	0	0.000582568	0	0	0
VAMP8_HUMAN	Q9BV40	VAMP8	VAMP8	0	0	0.000603253	0.000588452	0	0	0
VANG2_HUMAN	Q9ULK5	VANGL2 KIAA1215 STB1	VANGL2	0	0	0	0	5.01845e-05	0	0
VAPA_HUMAN	Q9P0L0	VAPA VAP33	VAPA	0.000598272	0.0013513	0.00100833	0.000829824	0.000457037	0.000531751	0.000535176
VAPB_HUMAN	O95292	VAPB UNQ484/PRO983	VAPB	0.000533646	0.000980946	0.00180944	0.000783261	0.00105945	0.00114045	0.00081115
VASN_HUMAN	Q6EMK4	VASN SLITL2 UNQ314/PRO357/PRO1282	VASN	0.000494696	0.000700676	0	0.000475662	0	0.000436288	0
VASP_HUMAN	P50552	VASP	VASP	0.000293267	0.000157652	5.52982e-05	0.000160123	0.000112915	0	5.76343e-05
VCAM1_HUMAN	P19320	VCAM1	VCAM1	0.00010547	4.67117e-05	0	0.00282244	0	0.000176278	0
VINC_HUMAN	P18206	VCL	VCL	0.000974322	0.000569582	0.000642096	0.00117337	0.000685989	0.00130424	0.000260284
VDAC1_HUMAN	P21796	VDAC1 VDAC	VDAC1	0.00156274	0.000406844	0.0014521	0.00298182	0.000995595	0.00111162	0.000483385
VIME_HUMAN	P08670	VIM	VIM	0.0130868	0.0163958	0.00956476	0.0195238	0.00712341	0.00423608	0.00740708
VLDLR_HUMAN	P98155	VLDLR	VLDLR	2.45619e-05	0	6.91227e-05	0.000145146	0	0	0
VPS28_HUMAN	Q9UK41	VPS28	VPS28	0	0	8.84771e-05	0	9.0332e-05	0	0
VPS4A_HUMAN	Q9UN37	VPS4A VPS4	VPS4A	4.20157e-05	0	0	0	0	0	0
VISTA_HUMAN	Q9H7M9	VSIR C10orf54 SISP1 VISTA PP2135 UNQ730/PRO1412	VSIR	0	7.41892e-05	0	9.51908e-05	0	0	0
VTNC_HUMAN	P04004	VTN	VTN	0	0	0	0	0.000111521	0	0
WAC2A_HUMAN	Q641Q2	WASHC2A FAM21A FAM21B	WASHC2A	3.99002e-05	2.57391e-05	0	0	0	0	0
WDR1_HUMAN	O75083	WDR1	WDR1	0.000601205	0.00087903	0.000174442	0.000570005	0.00030795	0.000216188	0.000331834
WLS_HUMAN	Q5T9L3	WLS C1orf139 GPR177 UNQ85/PRO18667	WLS	4.74439e-05	0	0	0.000130504	0	4.60598e-05	0
WNT5A_HUMAN	P41221	WNT5A	WNT5A	9.10541e-05	6.00579e-05	0	0	0	0	0
XRCC5_HUMAN	P13010	XRCC5 G22P2	XRCC5	0.000446018	0.000227931	0.000413819	0.000197125	0.000453474	0.000687633	0.000319419
YES_HUMAN	P07947	YES1 YES	YES1	7.23083e-05	0.00014473	0	0	0.000185107	0	0.000226758
YIPF3_HUMAN	Q9GZM5	YIPF3 C6orf109 KLIP1	YIPF3	3.08702e-05	0	0	8.51707e-05	0	0	0
YKT6_HUMAN	O15498	YKT6	YKT6	0.00014717	0	0.000201084	0.000809122	0.0002053	0.000389414	0
1433F_HUMAN	Q04917	YWHAH YWHA1	YWHAH	0.000998491	0.000990956	0.00104549	0.00121917	0.000860305	0.0014201	0.000823348
KAISO_HUMAN	Q86T24	ZBTB33 KAISO ZNF348	ZBTB33	0	0	5.97818e-05	0	0	0	0
ZDHC5_HUMAN	Q9C0B5	ZDHHC5 KIAA1748 ZNF375	ZDHHC5	0	0	0	0	1.93017e-05	0	0
ZGPAT_HUMAN	Q8N5A5	ZGPAT GPATC6 GPATCH6 KIAA1847 ZC3H9 ZC3HDC9 ZIP	ZGPAT	0	0	0	0	3.96193e-05	0	0
IGG1_HUMAN	P0DOX5			0.000613305	0.000257391	0.000467263	0.000689724	0	0.000707179	0
IGK_HUMAN	P0DOX7			0.00199912	0	0	0	0	0	0
RP1BL_HUMAN	A6NIZ1			0.000965839	0	0	0	0	0	0
IGA2_HUMAN	P0DOX2			0.000553394	0	0	0	0	0	0

## Sheet: Table S3
Table S3. List of cell-surface proteins upregulated by 2-fold in RMS compared to normal muscle
Entry ID	Entry	Gene names	Gene	Normal Muscle		Fusion Negative			Fusion Positive		Fold Change RMS/Normal Muscle
				hSkMC 1	hSkMC 2	RD	RMS-MC02	Rh36	RH30	Rh41
PPAC_HUMAN	P24666	ACP1	ACP1	0.000196003	0	0.000296339	8.99024e-05	0.000250922	0.000305807	0.000192114	2.31646
ANK2_HUMAN	Q01484	ANK2 ANKB	ANK2	0	0	7.64491e-05	3.72867e-06	0.00013529	1.40899e-05	8.76467e-05	∞
VATA_HUMAN	P38606	ATP6V1A ATP6A1 ATP6V1A1 VPP2	ATP6V1A	0.00025066	0.000111284	0.000418985	0.000350959	0.000188192	0.000809341	6.78051e-05	2.02825
VATB2_HUMAN	P21281	ATP6V1B2 ATP6B2 VPP3	ATP6V1B2	0.000211619	8.85064e-05	0.000443922	0.000387159	0.00018489	0.000507815	6.06677e-05	2.11172
CSKP_HUMAN	O14936	CASK LIN2	CASK	1.11721e-05	0	0.00021066	6.03508e-05	0.000501845	0.000135889	0.000120758	36.8599
CASP3_HUMAN	P42574	CASP3 CPP32	CASP3	8.2758e-05	0	0.000138245	0.00015171	0.000376383	0.000152939	0.000144086	4.6563
CD276_HUMAN	Q5ZPR3	CD276 B7H3 PSEC0249 UNQ309/PRO352	CD276	0.000211826	0.000154886	0.000539847	0.000387159	6.60322e-05	0.000916053	0.000182003	2.28091
CAD13_HUMAN	P55290	CDH13 CDHH	CDH13	6.41441e-05	0.000420405	0.000573812	0.000557768	0.000173715	0.00129706	0.000206892	2.31906
CADH4_HUMAN	P55283	CDH4	CDH4	0	0	6.63578e-05	0.000100674	9.78597e-05	5.71141e-05	6.91612e-05	∞
CHM4B_HUMAN	Q9H444	CHMP4B C20orf178 SHAX1	CHMP4B	0.00010593	0	0.000176954	0.000323649	0.000301107	0.000138648	0.00018443	4.24728
CHP1_HUMAN	Q99653	CHP1 CHP	CHP1	0.000562422	0.00085992	0.00177417	0.00189585	0.000171083	0.00366205	0.000471554	2.2427
CKAP5_HUMAN	Q14008	CKAP5 KIAA0097	CKAP5	5.1984e-05	0	1.95746e-05	3.58019e-05	7.32782e-05	0.00010823	3.57027e-05	2.09748
DLG1_HUMAN	Q12959	DLG1	DLG1	4.11754e-05	0.000100897	0.000186709	0.000108765	0.000338745	0.000101917	5.76343e-05	2.23483
DNJC9_HUMAN	Q8WXX5	DNAJC9	DNAJC9	0.000117897	0.000168162	0.000663578	0.000431532	0.000326199	0.000339723	0.000192114	2.73111
DUS3_HUMAN	P51452	DUSP3 VHR	DUSP3	8.798e-05	0	0.000221193	0.000323649	7.52767e-05	0.000203834	0.000230537	4.79422
EFNA5_HUMAN	P52803	EFNA5 EPLG7 LERK7	EFNA5	0	0	0.000170148	6.22401e-05	0.000202668	0.00021967	0.000133002	∞
EI2BA_HUMAN	Q14232	EIF2B1 EIF2BA	EIF2B1	6.90039e-05	0	0.000130113	0.000142786	0.000199262	8.39914e-05	6.78051e-05	3.61694
IF5_HUMAN	P55010	EIF5	EIF5	0.000120002	5.14782e-05	0.000270848	0.000165127	0.000168988	0.000249593	0.00016467	2.37748
ENAH_HUMAN	Q8N8S7	ENAH MENA	ENAH	0.000100806	5.64724e-05	0.000264111	0.000140215	0.000303354	0.000121692	0.000189247	2.59062
ENOB_HUMAN	P13929	ENO3	ENO3	0.000474218	0	0.000517685	0.000413169	0.000832848	0.000243039	0.000613131	2.20984
EPHA7_HUMAN	Q15375	EPHA7 EHK3 HEK11	EPHA7	0.000157898	0	0.00029624	5.77944e-05	3.36057e-05	0.000331421	0.000319047	2.62982
FABP5_HUMAN	Q01469	FABP5	FABP5	0.000785193	0	0.00130106	0.00140533	0.000602214	0.00380761	0.000614766	3.93839
FMR1_HUMAN	Q06787	FMR1	FMR1	3.30441e-05	0	0.000280385	2.27922e-05	0.000657346	0.000258381	0.000405876	19.668
FSCN1_HUMAN	Q16658	FSCN1 FAN1 HSN SNL	FSCN1	0.0005345	0.000206381	0.000644599	0.000433135	0.00229936	0.00102321	0.00125748	3.05462
GAS1_HUMAN	P54826	GAS1	GAS1	0	0.000175169	0.00121979	4.49512e-05	0.000480934	0.000555135	0.000288172	5.91196
LGUL_HUMAN	Q04760	GLO1	GLO1	0.000209757	0	0.00010533	0.000462355	0.000752767	0.000776752	0.000439119	4.83668
AATM_HUMAN	P00505	GOT2 KYAT4	GOT2	0.000710696	0.000236478	0.00124544	0.00163085	0.000470479	0.00129572	0.000360215	2.11269
GSHR_HUMAN	P00390	GSR GLUR GRD1	GSR	0.000189161	0.000225217	0.000268336	0.000268897	0.000282288	0.00130028	0.000226421	2.26481
HMGB1_HUMAN	P09429	HMGB1 HMG1	HMGB1	0.000387702	0.000353141	0.00065053	0.00122987	0.00207764	0.00179374	0.00202873	4.20089
HORN_HUMAN	Q86YZ3	HRNR S100A18	HRNR	0.000163859	0.0001297	0.000263205	0.00027397	0.000109445	0.000522146	0.000396492	2.13281
IGHA1_HUMAN	P01876	IGHA1	IGHA1	0.000821633	0.000464659	0.000818272	0.00084746	0.000475432	0.00126095	0.00321539	2.05786
JUPI2_HUMAN	Q9H910	JPT2 C16orf34 HN1L L11	JPT2	5.86533e-05	0.000126122	0.000221193	0.000485473	0.000150553	0.000428356	0.000115269	3.03254
L1CAM_HUMAN	P32004	L1CAM CAML1 MIC5	L1CAM	0	0.000396382	0.00052227	1.15589e-05	0.000172061	0.00196101	0.000263471	2.95712
LIN7A_HUMAN	O14910	LIN7A MALS1 VELI1	LIN7A	0	0	0.000680593	0.00012448	0.000405336	0.000470581	0.000665012	∞
LIN7C_HUMAN	Q9NUP9	LIN7C MALS3 VELI3	LIN7C	0.000267545	0.00057328	0.00083385	0.000768101	0.000786984	0.0015111	0.0010479	2.35385
MARE1_HUMAN	Q15691	MAPRE1	MAPRE1	0.00029366	0.000294284	0.000511767	0.000537146	0.000853136	0.00115506	0.000806881	2.62881
MRP_HUMAN	P49006	MARCKSL1 MLP MRP	MARCKSL1	0.000161887	0.000189182	0.000653792	0.000404561	0.000564575	0.000724017	0.000230537	2.93672
MESD_HUMAN	Q14696	MESD KIAA0081 MESDC2 MESDM UNQ1911/PRO4369	MESD	0.000169419	9.70166e-05	0.000935815	0.00112032	0.000173715	0.00021967	0.000221671	4.01026
MGRN1_HUMAN	O60291	MGRN1 KIAA0544 RNF156	MGRN1	3.86064e-05	6.2027e-05	0.000145044	0.000135577	4.93618e-05	0.000374519	3.7793e-05	2.95049
LYRIC_HUMAN	Q86UE4	MTDH AEG1 LYRIC	MTDH	0.00023851	0.000118239	0.000843695	0.000606841	0.00029405	5.41593e-05	0.000108064	2.13799
NECT1_HUMAN	Q15223	NECTIN1 HVEC PRR1 PVRL1	NECTIN1	0	0	0.000594621	2.83902e-05	9.24451e-05	0.000869404	0.000606677	∞
NFASC_HUMAN	O94856	NFASC KIAA0756	NFASC	8.83735e-05	3.36324e-05	0.000781548	6.92163e-05	1.00369e-05	0.000252808	0.000130638	4.0793
NRCAM_HUMAN	Q92823	NRCAM KIAA0343	NRCAM	1.63746e-05	0	0.000364555	0.000106286	2.09102e-05	0.00184284	4.80286e-05	58.2029
NRP2_HUMAN	O60462	NRP2 VEGF165R2	NRP2	0	2.40232e-05	0.000110892	0.000158175	2.15076e-05	0.000339917	3.29339e-05	11.0464
PCDH7_HUMAN	O60245	PCDH7 BHPCDH	PCDH7	2.03271e-05	0.000152216	0.00070044	0.000343478	5.1915e-05	0.0012326	6.95587e-05	5.55919
HAP28_HUMAN	Q13442	PDAP1 HASPP28	PDAP1	0.000265758	0	0.000526649	0.00123295	0.000465999	0.000485319	0.00010978	4.24551
PLXA2_HUMAN	O75051	PLXNA2 KIAA0463 OCT PLXN2 UNQ209/PRO235	PLXNA2	9.49881e-05	0	0.000159396	3.8347e-05	3.56762e-05	0.00025129	3.82408e-05	2.20217
SAP_HUMAN	P07602	PSAP GLBA SAP1	PSAP	0.000192649	0	0.000533913	0.000920725	0.000168724	0.00177251	9.93695e-05	7.25721
QSOX2_HUMAN	Q6ZRP7	QSOX2 QSCN6L1 SOXN	QSOX2	6.78661e-05	0	0.000113432	0.000145227	1.93017e-05	0.000135967	2.95561e-05	2.61388
SCRIB_HUMAN	Q14160	SCRIB CRIB1 KIAA0147 LAP4 SCRB1 VARTUL	SCRIB	3.8628e-05	5.76556e-05	3.79188e-05	3.69884e-05	0.000455962	2.32953e-05	5.26942e-05	2.52113
SDC2_HUMAN	P34741	SDC2 HSPG1	SDC2	0.000321537	0.000229312	0.00135139	0.000192025	0.000239517	0.000908634	0.000471554	2.2969
SPART_HUMAN	Q8N0X7	SPART KIAA0610 SPG20 TAHCCP1	SPART	5.62429e-05	0	9.09011e-05	0.000133006	5.15594e-05	5.58449e-05	3.15805e-05	2.58089
SPTN2_HUMAN	O15020	SPTBN2 KIAA0302 SCA5	SPTBN2	3.57877e-05	4.65393e-05	3.8403e-05	7.79439e-05	0.00035555	5.26509e-05	8.50691e-05	2.96193
SORCN_HUMAN	P30626	SRI	SRI	0.000227152	0	0.000301626	0.000294226	0.000171083	0.000277956	0.000733528	3.13168
TGON2_HUMAN	O43493	TGOLN2 TGN46 TGN51	TGOLN2	0.00014974	7.41892e-05	0.00039034	0.000380763	4.42804e-05	0.000335965	9.04068e-05	2.21812
TTYH3_HUMAN	Q9C0H2	TTYH3 KIAA1691	TTYH3	4.04506e-05	6.52353e-05	0.000263582	8.37023e-05	0.000298511	0.000488796	7.94956e-05	4.59508
UBP14_HUMAN	P54578	USP14 TGT	USP14	8.38959e-05	0	7.89974e-05	0.000491253	0.000161307	0.000109197	0.000329339	5.57879

## Sheet: Table S4
Table S4. List of cell-surface proteins upregulated by 2-fold in fusion-negative RMS compared to normal muscle
Entry ID	Entry	Gene names	Gene	Normal Muscle		Fusion Negative			Fold Change Fusion Negative/Normal Muscle
				hSkMC 1	hSkMC 2	RD	RMS-MC02	Rh36
PPAC_HUMAN	P24666	ACP1	ACP1	0.000196003	0	0.000296339	8.99024e-05	0.000250922	2.16719
ACL6A_HUMAN	O96019	ACTL6A BAF53 BAF53A INO80K	ACTL6A	3.74383e-05	5.36688e-05	0.000137023	6.88614e-05	8.00816e-05	2.09252
ANK2_HUMAN	Q01484	ANK2 ANKB	ANK2	0	0	7.64491e-05	3.72867e-06	0.00013529	∞
A4_HUMAN	P05067	APP A4 AD1	APP	2.69671e-05	0	0.000279669	1.86005e-05	5.1915e-05	8.65709
AT1B1_HUMAN	P05026	ATP1B1 ATP1B	ATP1B1	5.04429e-05	7.20695e-05	0.000182138	0.000182997	0.000107538	2.57211
VATB2_HUMAN	P21281	ATP6V1B2 ATP6B2 VPP3	ATP6V1B2	0.000211619	8.85064e-05	0.000443922	0.000387159	0.00018489	2.25677
BST2_HUMAN	Q10589	BST2	BST2	0	0	0.000552982	0.000357298	0.000112915	∞
CADM1_HUMAN	Q9BY67	CADM1 IGSF4 IGSF4A NECL2 SYNCAM TSLC1	CADM1	0	0	4.51414e-05	3.30254e-05	9.21755e-05	∞
CAP2_HUMAN	P40123	CAP2	CAP2	0	0	4.17345e-05	6.10658e-05	0.000156235	∞
CSKP_HUMAN	O14936	CASK LIN2	CASK	1.11721e-05	0	0.00021066	6.03508e-05	0.000501845	46.1183
CASP3_HUMAN	P42574	CASP3 CPP32	CASP3	8.2758e-05	0	0.000138245	0.00015171	0.000376383	5.36778
CCNY_HUMAN	Q8ND76	CCNY C10orf9 CBCP1 CFP1	CCNY	6.046e-05	0	5.67161e-05	8.29869e-05	9.65086e-05	2.6046
CD82_HUMAN	P27701	CD82 KAI1 SAR2 ST6 TSPAN27	CD82	0	0	0.000442385	0.000593356	5.01845e-05	∞
CADH4_HUMAN	P55283	CDH4	CDH4	0	0	6.63578e-05	0.000100674	9.78597e-05	∞
CHM4B_HUMAN	Q9H444	CHMP4B C20orf178 SHAX1	CHMP4B	0.00010593	0	0.000176954	0.000323649	0.000301107	5.04552
CNRP1_HUMAN	Q96F85	CNRIP1 C2orf32	CNRIP1	0.000139382	0	0.000232834	0.000340683	0.000277335	4.06965
DLG1_HUMAN	Q12959	DLG1	DLG1	4.11754e-05	0.000100897	0.000186709	0.000108765	0.000338745	2.97603
DNJC9_HUMAN	Q8WXX5	DNAJC9	DNAJC9	0.000117897	0.000168162	0.000663578	0.000431532	0.000326199	3.31239
DUS3_HUMAN	P51452	DUSP3 VHR	DUSP3	8.798e-05	0	0.000221193	0.000323649	7.52767e-05	4.69893
EFNA5_HUMAN	P52803	EFNA5 EPLG7 LERK7	EFNA5	0	0	0.000170148	6.22401e-05	0.000202668	∞
EI2BA_HUMAN	Q14232	EIF2B1 EIF2BA	EIF2B1	6.90039e-05	0	0.000130113	0.000142786	0.000199262	4.56169
IF5_HUMAN	P55010	EIF5	EIF5	0.000120002	5.14782e-05	0.000270848	0.000165127	0.000168988	2.35193
ENAH_HUMAN	Q8N8S7	ENAH MENA	ENAH	0.000100806	5.64724e-05	0.000264111	0.000140215	0.000303354	2.99969
ENOB_HUMAN	P13929	ENO3	ENO3	0.000474218	0	0.000517685	0.000413169	0.000832848	2.47945
RB6I2_HUMAN	Q8IUD2	ERC1 ELKS KIAA1081 RAB6IP2	ERC1	2.74938e-05	0	3.45614e-05	2.52851e-05	4.11669e-05	2.44937
FABP5_HUMAN	Q01469	FABP5	FABP5	0.000785193	0	0.00130106	0.00140533	0.000602214	2.80917
FGFR4_HUMAN	P22455	FGFR4 JTK2 TKF	FGFR4	0	5.7328e-05	0.000427304	1.83891e-05	4.27708e-05	5.68034
FMR1_HUMAN	Q06787	FMR1	FMR1	3.30441e-05	0	0.000280385	2.27922e-05	0.000657346	19.3786
FSCN1_HUMAN	Q16658	FSCN1 FAN1 HSN SNL	FSCN1	0.0005345	0.000206381	0.000644599	0.000433135	0.00229936	3.03881
GAS1_HUMAN	P54826	GAS1	GAS1	0	0.000175169	0.00121979	4.49512e-05	0.000480934	6.64377
LGUL_HUMAN	Q04760	GLO1	GLO1	0.000209757	0	0.00010533	0.000462355	0.000752767	4.19676
GBG5_HUMAN	P63218	GNG5 GNGT5	GNG5	0.000167581	0.000360348	0.00126396	0.000231178	0.000967843	3.11024
GOLM1_HUMAN	Q8NBJ4	GOLM1 C9orf155 GOLPH2 PSEC0242 UNQ686/PRO1326	GOLM1	7.18842e-05	0	0.00122885	0.000431532	6.69126e-05	16.0192
AATM_HUMAN	P00505	GOT2 KYAT4	GOT2	0.000710696	0.000236478	0.00124544	0.00163085	0.000470479	2.35561
HMGB1_HUMAN	P09429	HMGB1 HMG1	HMGB1	0.000387702	0.000353141	0.00065053	0.00122987	0.00207764	3.56174
IBP2_HUMAN	P18065	IGFBP2 BP2 IBP2	IGFBP2	0	0	6.31979e-05	9.24711e-05	0.000129046	∞
JUPI2_HUMAN	Q9H910	JPT2 C16orf34 HN1L L11	JPT2	5.86533e-05	0.000126122	0.000221193	0.000485473	0.000150553	3.09284
LIN7A_HUMAN	O14910	LIN7A MALS1 VELI1	LIN7A	0	0	0.000680593	0.00012448	0.000405336	∞
MARE1_HUMAN	Q15691	MAPRE1	MAPRE1	0.00029366	0.000294284	0.000511767	0.000537146	0.000853136	2.15672
MRP_HUMAN	P49006	MARCKSL1 MLP MRP	MARCKSL1	0.000161887	0.000189182	0.000653792	0.000404561	0.000564575	3.08187
MESD_HUMAN	Q14696	MESD KIAA0081 MESDC2 MESDM UNQ1911/PRO4369	MESD	0.000169419	9.70166e-05	0.000935815	0.00112032	0.000173715	5.57946
MGRN1_HUMAN	O60291	MGRN1 KIAA0544 RNF156	MGRN1	3.86064e-05	6.2027e-05	0.000145044	0.000135577	4.93618e-05	2.18604
LYRIC_HUMAN	Q86UE4	MTDH AEG1 LYRIC	MTDH	0.00023851	0.000118239	0.000843695	0.000606841	0.00029405	3.26016
SNAA_HUMAN	P54920	NAPA SNAPA	NAPA	0.000195958	7.64374e-05	0.00033514	0.000539415	0.000114056	2.41955
NCS1_HUMAN	P62166	NCS1 FLUP FREQ	NCS1	0.000160366	0	0.000295695	0.000441339	0.000239517	4.05967
NECT1_HUMAN	Q15223	NECTIN1 HVEC PRR1 PVRL1	NECTIN1	0	0	0.000594621	2.83902e-05	9.24451e-05	∞
NFASC_HUMAN	O94856	NFASC KIAA0756	NFASC	8.83735e-05	3.36324e-05	0.000781548	6.92163e-05	1.00369e-05	4.7036
NRCAM_HUMAN	Q92823	NRCAM KIAA0343	NRCAM	1.63746e-05	0	0.000364555	0.000106286	2.09102e-05	20.0209
NRP2_HUMAN	O60462	NRP2 VEGF165R2	NRP2	0	2.40232e-05	0.000110892	0.000158175	2.15076e-05	8.06374
NUCB2_HUMAN	P80303	NUCB2 NEFA	NUCB2	0.000123408	0	4.42385e-05	0.000776757	4.5166e-05	4.67912
8ODP_HUMAN	P36639	NUDT1 MTH1	NUDT1	7.65044e-05	0	9.61707e-05	0.000140717	9.8187e-05	2.91987
PALM_HUMAN	O75781	PALM KIAA0270	PALM	0.000112283	9.00869e-05	0.00010533	0.000115589	0.000555614	2.55813
PCDH7_HUMAN	O60245	PCDH7 BHPCDH	PCDH7	2.03271e-05	0.000152216	0.00070044	0.000343478	5.1915e-05	4.23405
HAP28_HUMAN	Q13442	PDAP1 HASPP28	PDAP1	0.000265758	0	0.000526649	0.00123295	0.000465999	5.58301
PDZ11_HUMAN	Q5EBL8	PDZD11 AIPP1 PDZK11 PISP HSPC227 UNQ6486/PRO21335	PDZD11	0	0	0.000276491	0.00020228	9.40959e-05	∞
PPM1A_HUMAN	P35813	PPM1A PPPM1A	PPM1A	0	0	5.26649e-05	7.70592e-05	3.5846e-05	∞
PRC2A_HUMAN	P48634	PRRC2A BAT2 G2	PRRC2A	1.92612e-05	1.1015e-05	9.65907e-05	2.82663e-05	0.000141349	5.86174
SAP_HUMAN	P07602	PSAP GLBA SAP1	PSAP	0.000192649	0	0.000533913	0.000920725	0.000168724	5.61768
QSOX2_HUMAN	Q6ZRP7	QSOX2 QSCN6L1 SOXN	QSOX2	6.78661e-05	0	0.000113432	0.000145227	1.93017e-05	2.73048
RAB7A_HUMAN	P51149	RAB7A RAB7	RAB7A	0.000919977	0.000164506	0.00126427	0.00200226	9.8187e-05	2.06839
RALA_HUMAN	P11233	RALA RAL	RALA	0.000293267	0	0.000276491	0.000404561	0.000313653	2.26121
SCRB1_HUMAN	Q8WTV0	SCARB1 CD36L1 CLA1	SCARB1	2.88459e-05	0	0.000161036	0.00024979	3.70213e-05	10.3503
SCFD1_HUMAN	Q8WVM8	SCFD1 C14orf163 KIAA0917 STXBP1L2 FKSG23	SCFD1	0.000158976	0	6.14424e-05	0.000606841	2.09102e-05	2.89014
SCRIB_HUMAN	Q14160	SCRIB CRIB1 KIAA0147 LAP4 SCRB1 VARTUL	SCRIB	3.8628e-05	5.76556e-05	3.79188e-05	3.69884e-05	0.000455962	3.67573
SDC2_HUMAN	P34741	SDC2 HSPG1	SDC2	0.000321537	0.000229312	0.00135139	0.000192025	0.000239517	2.1578
SDCB1_HUMAN	O00560	SDCBP MDA9 SYCL	SDCBP	0.000110528	7.8826e-05	0.000365903	0.000657412	9.40959e-05	3.93411
SPS1_HUMAN	P49903	SEPHS1 SELD SPS SPS1	SEPHS1	4.09209e-05	0	5.14402e-05	0.000338702	8.7531e-05	7.78205
GDN_HUMAN	P07093	SERPINE2 PI7 PN1	SERPINE2	0	0.000200648	0.000560324	7.35565e-05	3.42167e-05	2.2198
NADAP_HUMAN	Q9BWU0	SLC4A1AP HLC3	SLC4A1AP	0	0	9.94125e-05	3.6365e-05	1.69161e-05	∞
NHRF1_HUMAN	O14745	SLC9A3R1 NHERF NHERF1	SLC9A3R1	0	6.46778e-05	0.000510445	0.000912855	9.65086e-05	15.6654
SNP29_HUMAN	O95721	SNAP29	SNAP29	6.06759e-05	0	7.62733e-05	0.000446412	7.78724e-05	6.59854
SPART_HUMAN	Q8N0X7	SPART KIAA0610 SPG20 TAHCCP1	SPART	5.62429e-05	0	9.09011e-05	0.000133006	5.15594e-05	3.2652
SPTN2_HUMAN	O15020	SPTBN2 KIAA0302 SCA5	SPTBN2	3.57877e-05	4.65393e-05	3.8403e-05	7.79439e-05	0.00035555	3.82132
SORCN_HUMAN	P30626	SRI	SRI	0.000227152	0	0.000301626	0.000294226	0.000171083	2.25088
STOM_HUMAN	P27105	STOM BND7 EPB72	STOM	0.000192825	7.8826e-05	0.000331342	0.000353991	0.000329336	2.49013
SUCA_HUMAN	P53597	SUCLG1	SUCLG1	0.000146879	0	0.000173454	0.000224756	0.000167282	2.56669
SUCB2_HUMAN	Q96I99	SUCLG2	SUCLG2	0.000231184	0	4.70623e-05	0.00113621	0.000112114	3.73553
SUMO1_HUMAN	P63165	SUMO1 SMT3C SMT3H3 UBL1 OK/SW-cl.43	SUMO1	0.000195511	0	0.000184327	0.000674268	0.000188192	3.5694
TGON2_HUMAN	O43493	TGOLN2 TGN46 TGN51	TGOLN2	0.00014974	7.41892e-05	0.00039034	0.000380763	4.42804e-05	2.4275
TSN3_HUMAN	O60637	TSPAN3 TM4SF8	TSPAN3	0	0	0.000232332	0.00052015	0.000161307	∞
TTYH3_HUMAN	Q9C0H2	TTYH3 KIAA1691	TTYH3	4.04506e-05	6.52353e-05	0.000263582	8.37023e-05	0.000298511	4.07368
UB2D3_HUMAN	P61077	UBE2D3 UBC5C UBCH5C	UBE2D3	0.000241514	0	0.000130113	0.000380763	0.000309963	2.26582
UCRI_HUMAN	P47985	UQCRFS1	UQCRFS1	0.000293267	0	0.000429337	0.000647297	7.52767e-05	2.61858
UBP14_HUMAN	P54578	USP14 TGT	USP14	8.38959e-05	0	7.89974e-05	0.000491253	0.000161307	5.81321
YKT6_HUMAN	O15498	YKT6	YKT6	0.00014717	0	0.000201084	0.000809122	0.0002053	5.50613

## Sheet: Table S5
Table S5. List of cell-surface proteins upregulated by 2-fold in fusion-positive RMS compared to normal muscle
Entry ID	Entry	Gene names	Gene	Normal Muscle		Fusion Positive		Fold Change Fusion Positive/Normal Muscle
				hSkMC 1	hSkMC 2	RH30	Rh41
PPAC_HUMAN	P24666	ACP1	ACP1	0.000196003	0	0.000305807	0.000192114	2.54038
ANK2_HUMAN	Q01484	ANK2 ANKB	ANK2	0	0	1.40899e-05	8.76467e-05	∞
ARHG2_HUMAN	Q92974	ARHGEF2 KIAA0651 LFP40	ARHGEF2	3.14214e-05	0	0.000109197	0.000144086	8.06082
ARRB1_HUMAN	P49407	ARRB1 ARR1	ARRB1	0	0	0.000173476	0.000294303	∞
VATA_HUMAN	P38606	ATP6V1A ATP6A1 ATP6V1A1 VPP2	ATP6V1A	0.00025066	0.000111284	0.000809341	6.78051e-05	2.42343
B2MG_HUMAN	P61769	B2M CDABP0092 HDCMA22P	B2M	0.000546536	0.000630608	0.00183581	0.000658678	2.1191
BAG4_HUMAN	O95429	BAG4 SODD	BAG4	0	0	0.000171342	0.000253591	∞
BCAM_HUMAN	P50895	BCAM LU MSK19	BCAM	0.000197719	0.000432955	0.00178081	0.000275268	3.26012
CA2D1_HUMAN	P54289	CACNA2D1 CACNL2A CCHL2A MHS3	CACNA2D1	0.000431066	0.000242154	0.0011912	0.000193651	2.05706
CSKP_HUMAN	O14936	CASK LIN2	CASK	1.11721e-05	0	0.000135889	0.000120758	22.9722
CASP3_HUMAN	P42574	CASP3 CPP32	CASP3	8.2758e-05	0	0.000152939	0.000144086	3.58908
CC124_HUMAN	Q96CT7	CCDC124	CCDC124	0.00015814	0	0.000235193	0.000133002	2.32829
CD276_HUMAN	Q5ZPR3	CD276 B7H3 PSEC0249 UNQ309/PRO352	CD276	0.000211826	0.000154886	0.000916053	0.000182003	2.99432
LFA3_HUMAN	P19256	CD58 LFA3	CD58	0	9.00869e-05	0.000327772	0.000123502	5.00932
CAD13_HUMAN	P55290	CDH13 CDHH	CDH13	6.41441e-05	0.000420405	0.00129706	0.000206892	3.10382
CAD15_HUMAN	P55291	CDH15 CDH14 CDH3	CDH15	0	0.000113368	0.000183222	9.06607e-05	2.41588
CADH4_HUMAN	P55283	CDH4	CDH4	0	0	5.71141e-05	6.91612e-05	∞
CDSN_HUMAN	Q15517	CDSN	CDSN	0.000203882	0	0.000164752	0.000399007	2.76512
CHM4B_HUMAN	Q9H444	CHMP4B C20orf178 SHAX1	CHMP4B	0.00010593	0	0.000138648	0.00018443	3.04991
CHP1_HUMAN	Q99653	CHP1 CHP	CHP1	0.000562422	0.00085992	0.00366205	0.000471554	2.9062
CKAP5_HUMAN	Q14008	CKAP5 KIAA0097	CKAP5	5.1984e-05	0	0.00010823	3.57027e-05	2.7688
CRKL_HUMAN	P46109	CRKL	CRKL	0.000181917	0.000111284	0.000275865	0.000339025	2.09717
CROCC_HUMAN	Q5TZA2	CROCC KIAA0445	CROCC	0	0	2.13714e-05	2.51678e-05	∞
CXAR_HUMAN	P78310	CXADR CAR	CXADR	0	0	0.000142785	5.76343e-05	∞
DSC1_HUMAN	Q08554	DSC1 CDHF1	DSC1	0.000276881	0.00017657	0.000413976	0.000610924	2.26022
DSC3_HUMAN	Q14574	DSC3 CDHF3 DSC4	DSC3	0.000106107	0	5.71141e-05	0.000161376	2.05914
DSG1_HUMAN	Q02413	DSG1 CDHF4	DSG1	0.000759659	0.000276583	0.00101975	0.00122347	2.16476
DESP_HUMAN	P15924	DSP	DSP	0.000677122	0.000148155	0.00103636	0.000760357	2.17711
DUS3_HUMAN	P51452	DUSP3 VHR	DUSP3	8.798e-05	0	0.000203834	0.000230537	4.93716
ECE1_HUMAN	P42892	ECE1	ECE1	8.0969e-05	0	0.000248501	9.27449e-05	4.21453
EFNA5_HUMAN	P52803	EFNA5 EPLG7 LERK7	EFNA5	0	0	0.00021967	0.000133002	∞
EI2BA_HUMAN	Q14232	EIF2B1 EIF2BA	EIF2B1	6.90039e-05	0	8.39914e-05	6.78051e-05	2.19982
IF5_HUMAN	P55010	EIF5	EIF5	0.000120002	5.14782e-05	0.000249593	0.00016467	2.4158
EPHA4_HUMAN	P54764	EPHA4 HEK8 SEK TYRO1	EPHA4	0	0	0.000129805	0.000167664	∞
EPHA7_HUMAN	Q15375	EPHA7 EHK3 HEK11	EPHA7	0.000157898	0	0.000331421	0.000319047	4.11955
EPHB4_HUMAN	P54760	EPHB4 HTK MYK1 TYRO11	EPHB4	4.36382e-05	9.34234e-05	0.000370184	3.20191e-05	2.93447
FABP5_HUMAN	Q01469	FABP5	FABP5	0.000785193	0	0.00380761	0.000614766	5.63221
FAS_HUMAN	P49327	FASN FAS	FASN	0.000166993	9.70166e-05	0.000545051	0.000223782	2.91214
FMR1_HUMAN	Q06787	FMR1	FMR1	3.30441e-05	0	0.000258381	0.000405876	20.1021
FSCN1_HUMAN	Q16658	FSCN1 FAN1 HSN SNL	FSCN1	0.0005345	0.000206381	0.00102321	0.00125748	3.07834
GAS1_HUMAN	P54826	GAS1	GAS1	0	0.000175169	0.000555135	0.000288172	4.81425
LGUL_HUMAN	Q04760	GLO1	GLO1	0.000209757	0	0.000776752	0.000439119	5.79656
GEPH_HUMAN	Q9NQX3	GPHN GPH KIAA1385	GPHN	0	0	5.09585e-05	8.64515e-05	∞
GRN_HUMAN	P28799	GRN	GRN	0	0	0.000178482	3.60215e-05	∞
GSHR_HUMAN	P00390	GSR GLUR GRD1	GSR	0.000189161	0.000225217	0.00130028	0.000226421	3.68431
HMGB1_HUMAN	P09429	HMGB1 HMG1	HMGB1	0.000387702	0.000353141	0.00179374	0.00202873	5.15962
HORN_HUMAN	Q86YZ3	HRNR S100A18	HRNR	0.000163859	0.0001297	0.000522146	0.000396492	3.12932
IGDC4_HUMAN	Q8TDY8	IGDCC4 DDM36 KIAA1628 NOPE	IGDCC4	0	1.88241e-05	0.000745893	1.72043e-05	40.5383
IGF1R_HUMAN	P08069	IGF1R	IGF1R	0	2.44106e-05	0.000203965	2.23101e-05	9.26953
MPRI_HUMAN	P11717	IGF2R MPRI	IGF2R	0.000161054	0.000151898	0.000441307	0.000197724	2.04195
IGHA1_HUMAN	P01876	IGHA1	IGHA1	0.000821633	0.000464659	0.00126095	0.00321539	3.48004
IGHG2_HUMAN	P01859	IGHG2	IGHG2	0.000130341	0.00028027	0.000651277	0.000480286	2.7558
IGLC2_HUMAN	P0DOY2	IGLC2	IGLC2	0.000479891	0.000802592	0.00113063	0.00146706	2.02551
IL4RA_HUMAN	P24394	IL4R IL4RA 582J2.1	IL4R	0	0	9.51902e-05	2.56153e-05	∞
ITA4_HUMAN	P13612	ITGA4 CD49D	ITGA4	0.000315054	0.000921236	0.00219761	0.000471098	2.15864
JAM3_HUMAN	Q9BX67	JAM3 UNQ859/PRO1868	JAM3	0.000395502	0.00144139	0.00448725	0.000823348	2.89108
JUPI2_HUMAN	Q9H910	JPT2 C16orf34 HN1L L11	JPT2	5.86533e-05	0.000126122	0.000428356	0.000115269	2.94209
KIRR1_HUMAN	Q96J84	KIRREL1 KIRREL NEPH1	KIRREL1	0.000147266	0.000225217	0.00115588	4.11674e-05	3.2137
IMA1_HUMAN	P52292	KPNA2 RCH1 SRP1	KPNA2	4.04506e-05	0	0.000175719	0.000119243	7.29192
L1CAM_HUMAN	P32004	L1CAM CAML1 MIC5	L1CAM	0	0.000396382	0.00196101	0.000263471	5.61196
LIN7A_HUMAN	O14910	LIN7A MALS1 VELI1	LIN7A	0	0	0.000470581	0.000665012	∞
LIN7C_HUMAN	Q9NUP9	LIN7C MALS3 VELI3	LIN7C	0.000267545	0.00057328	0.0015111	0.0010479	3.04344
LCAP_HUMAN	Q9UIQ6	LNPEP OTASE	LNPEP	0.000113224	0.000129356	0.000488155	3.94081e-05	2.17481
MARE1_HUMAN	Q15691	MAPRE1	MAPRE1	0.00029366	0.000294284	0.00115506	0.000806881	3.33695
MRP_HUMAN	P49006	MARCKSL1 MLP MRP	MARCKSL1	0.000161887	0.000189182	0.000724017	0.000230537	2.71899
MEG10_HUMAN	Q96KG7	MEGF10 KIAA1780	MEGF10	0	9.30405e-05	0.000521622	0.000151172	7.23119
MET_HUMAN	P08581	MET	MET	0	5.6593e-05	0.0003242	3.69451e-05	6.38144
MGRN1_HUMAN	O60291	MGRN1 KIAA0544 RNF156	MGRN1	3.86064e-05	6.2027e-05	0.000374519	3.7793e-05	4.09717
NDE1_HUMAN	Q9NXR1	NDE1 NUDE	NDE1	4.63053e-05	0	0.0001503	9.10016e-05	5.21111
NECT1_HUMAN	Q15223	NECTIN1 HVEC PRR1 PVRL1	NECTIN1	0	0	0.000869404	0.000606677	∞
NFASC_HUMAN	O94856	NFASC KIAA0756	NFASC	8.83735e-05	3.36324e-05	0.000252808	0.000130638	3.14285
NRCAM_HUMAN	Q92823	NRCAM KIAA0343	NRCAM	1.63746e-05	0	0.00184284	4.80286e-05	115.476
NRP2_HUMAN	O60462	NRP2 VEGF165R2	NRP2	0	2.40232e-05	0.000339917	3.29339e-05	15.5205
NSF1C_HUMAN	Q9UNZ2	NSFL1C UBXN2C	NSFL1C	0.000129039	0	0.000149147	0.000140572	2.2452
PHAG1_HUMAN	Q9NWQ8	PAG1 CBP PAG	PAG1	5.01689e-05	0	0.000364558	4.90505e-05	8.24432
PARK7_HUMAN	Q99497	PARK7	PARK7	0.000999911	0.000315304	0.00129465	0.00195957	2.47429
PCDH7_HUMAN	O60245	PCDH7 BHPCDH	PCDH7	2.03271e-05	0.000152216	0.0012326	6.95587e-05	7.54689
HAP28_HUMAN	Q13442	PDAP1 HASPP28	PDAP1	0.000265758	0	0.000485319	0.00010978	2.23925
PGM5_HUMAN	Q15124	PGM5 PGMRP	PGM5	0	4.06844e-05	0.000164382	0.000278876	10.895
PLXA2_HUMAN	O75051	PLXNA2 KIAA0463 OCT PLXN2 UNQ209/PRO235	PLXNA2	9.49881e-05	0	0.00025129	3.82408e-05	3.04808
KAPCA_HUMAN	P17612	PRKACA PKACA	PRKACA	5.73667e-05	0	0.000149147	5.62286e-05	3.58004
SAP_HUMAN	P07602	PSAP GLBA SAP1	PSAP	0.000192649	0	0.00177251	9.93695e-05	9.71651
PTPRD_HUMAN	P23468	PTPRD	PTPRD	3.29015e-05	0	0.000146106	3.2168e-05	5.41842
QSOX2_HUMAN	Q6ZRP7	QSOX2 QSCN6L1 SOXN	QSOX2	6.78661e-05	0	0.000135967	2.95561e-05	2.43897
RB11A_HUMAN	P62491	RAB11A RAB11	RAB11A	0.000635411	0	0.00101917	0.000384229	2.20865
RCC2_HUMAN	Q9P258	RCC2 KIAA1470 TD60	RCC2	6.83433e-05	0.000270261	0.000545984	0.000576343	3.31457
RECK_HUMAN	O95980	RECK ST15	RECK	0.000136068	2.37965e-05	0.000484931	4.34976e-05	3.30548
SDC2_HUMAN	P34741	SDC2 HSPG1	SDC2	0.000321537	0.000229312	0.000908634	0.000471554	2.50556
SDK2_HUMAN	Q58EX2	SDK2 KIAA1514	SDK2	0	0	0.000136458	5.78755e-05	∞
MOT1_HUMAN	P53985	SLC16A1 MCT1	SLC16A1	7.61961e-05	0	0.000317301	4.26921e-05	4.72456
CTL2_HUMAN	Q8IWA5	SLC44A2 CTL2 PSEC0210	SLC44A2	0.000209838	0.0010878	0.00230222	0.000489892	2.15169
SNP23_HUMAN	O00161	SNAP23	SNAP23	0.000447944	0.00060319	0.00185342	0.000751752	2.47844
SPR1B_HUMAN	P22528	SPRR1B	SPRR1B	0.000707382	0	0.00114228	0.000461075	2.26661
SORCN_HUMAN	P30626	SRI	SRI	0.000227152	0	0.000277956	0.000733528	4.4529
TRFE_HUMAN	P02787	TF PRO1400	TF	0.000164501	0	0.000198606	0.000194609	2.39036
TTYH3_HUMAN	Q9C0H2	TTYH3 KIAA1691	TTYH3	4.04506e-05	6.52353e-05	0.000488796	7.94956e-05	5.37718
UBE2C_HUMAN	O00762	UBE2C UBCH10	UBE2C	0.000117897	0	0.000316095	0.000115269	3.65882
UBQL1_HUMAN	Q9UMX0	UBQLN1 DA41 PLIC1	UBQLN1	0.000102411	0	0.000226643	5.48898e-05	2.74906
UBP14_HUMAN	P54578	USP14 TGT	USP14	8.38959e-05	0	0.000109197	0.000329339	5.22714

## Sheet: Table S6
Table S6. List of cell-surface proteins from Table S4 upregulated by 2-fold in RMS at the RNA level
				Proteomic
Entry ID	Entry	Gene names	Gene	Normal Muscle		Fusion Negative			Fusion Positive		Fold Change RMS/Normal Muscle	Transcriptomic (GSE108022)
				hSkMC 1	hSkMC 2	RD	RMS-MC02	Rh36	RH30	Rh41		Log2(Fold Change)	p-value
CSKP_HUMAN	O14936	CASK LIN2	CASK	1.11721e-05	0	0.00021066	6.03508e-05	0.000501845	0.000135889	0.000120758	36.8599	1.27769	2.17e-08
CD276_HUMAN	Q5ZPR3	CD276 B7H3 PSEC0249 UNQ309/PRO352	CD276	0.000211826	0.000154886	0.000539847	0.000387159	6.60322e-05	0.000916053	0.000182003	2.28091	2.14219	1.67e-11
CADH4_HUMAN	P55283	CDH4	CDH4	0	0	6.63578e-05	0.000100674	9.78597e-05	5.71141e-05	6.91612e-05	∞	2.1661	0.0132264
DNJC9_HUMAN	Q8WXX5	DNAJC9	DNAJC9	0.000117897	0.000168162	0.000663578	0.000431532	0.000326199	0.000339723	0.000192114	2.73111	1.48338	6.13e-11
EFNA5_HUMAN	P52803	EFNA5 EPLG7 LERK7	EFNA5	0	0	0.000170148	6.22401e-05	0.000202668	0.00021967	0.000133002	∞	3.01344	1.79e-11
EPHA7_HUMAN	Q15375	EPHA7 EHK3 HEK11	EPHA7	0.000157898	0	0.00029624	5.77944e-05	3.36057e-05	0.000331421	0.000319047	2.62982	5.50708	3.15e-12
FMR1_HUMAN	Q06787	FMR1	FMR1	3.30441e-05	0	0.000280385	2.27922e-05	0.000657346	0.000258381	0.000405876	19.668	1.85434	2.88e-09
FSCN1_HUMAN	Q16658	FSCN1 FAN1 HSN SNL	FSCN1	0.0005345	0.000206381	0.000644599	0.000433135	0.00229936	0.00102321	0.00125748	3.05462	4.78356	4.67e-46
GAS1_HUMAN	P54826	GAS1	GAS1	0	0.000175169	0.00121979	4.49512e-05	0.000480934	0.000555135	0.000288172	5.91196	1.99541	1.51e-07
HMGB1_HUMAN	P09429	HMGB1 HMG1	HMGB1	0.000387702	0.000353141	0.00065053	0.00122987	0.00207764	0.00179374	0.00202873	4.20089	1.11536	7.82e-06
JUPI2_HUMAN	Q9H910	JPT2 C16orf34 HN1L L11	JPT2	5.86533e-05	0.000126122	0.000221193	0.000485473	0.000150553	0.000428356	0.000115269	3.03254	1.358	6.96e-09
L1CAM_HUMAN	P32004	L1CAM CAML1 MIC5	L1CAM	0	0.000396382	0.00052227	1.15589e-05	0.000172061	0.00196101	0.000263471	2.95712	2.32314	0.024682
MARE1_HUMAN	Q15691	MAPRE1	MAPRE1	0.00029366	0.000294284	0.000511767	0.000537146	0.000853136	0.00115506	0.000806881	2.62881	1.59936	4.57e-13
MRP_HUMAN	P49006	MARCKSL1 MLP MRP	MARCKSL1	0.000161887	0.000189182	0.000653792	0.000404561	0.000564575	0.000724017	0.000230537	2.93672	4.70322	7.72e-52
NECT1_HUMAN	Q15223	NECTIN1 HVEC PRR1 PVRL1	NECTIN1	0	0	0.000594621	2.83902e-05	9.24451e-05	0.000869404	0.000606677	∞	5.63723	7.73e-37
NRCAM_HUMAN	Q92823	NRCAM KIAA0343	NRCAM	1.63746e-05	0	0.000364555	0.000106286	2.09102e-05	0.00184284	4.80286e-05	58.2029	6.17535	8.68e-15
NRP2_HUMAN	O60462	NRP2 VEGF165R2	NRP2	0	2.40232e-05	0.000110892	0.000158175	2.15076e-05	0.000339917	3.29339e-05	11.0464	1.14457	0.0360868
PCDH7_HUMAN	O60245	PCDH7 BHPCDH	PCDH7	2.03271e-05	0.000152216	0.00070044	0.000343478	5.1915e-05	0.0012326	6.95587e-05	5.55919	3.30958	1.87e-08
PLXA2_HUMAN	O75051	PLXNA2 KIAA0463 OCT PLXN2 UNQ209/PRO235	PLXNA2	9.49881e-05	0	0.000159396	3.8347e-05	3.56762e-05	0.00025129	3.82408e-05	2.20217	1.62124	8.18e-07
QSOX2_HUMAN	Q6ZRP7	QSOX2 QSCN6L1 SOXN	QSOX2	6.78661e-05	0	0.000113432	0.000145227	1.93017e-05	0.000135967	2.95561e-05	2.61388	2.2104	2.44e-06
SCRIB_HUMAN	Q14160	SCRIB CRIB1 KIAA0147 LAP4 SCRB1 VARTUL	SCRIB	3.8628e-05	5.76556e-05	3.79188e-05	3.69884e-05	0.000455962	2.32953e-05	5.26942e-05	2.52113	1.13255	3.9e-05
SDC2_HUMAN	P34741	SDC2 HSPG1	SDC2	0.000321537	0.000229312	0.00135139	0.000192025	0.000239517	0.000908634	0.000471554	2.2969	1.33958	2.39e-05
SPTN2_HUMAN	O15020	SPTBN2 KIAA0302 SCA5	SPTBN2	3.57877e-05	4.65393e-05	3.8403e-05	7.79439e-05	0.00035555	5.26509e-05	8.50691e-05	2.96193	5.20126	1.58e-17
TTYH3_HUMAN	Q9C0H2	TTYH3 KIAA1691	TTYH3	4.04506e-05	6.52353e-05	0.000263582	8.37023e-05	0.000298511	0.000488796	7.94956e-05	4.59508	4.39016	1.1e-42

## Sheet: Table S7
Table S7. List of cell-surface proteins from Table S5 upregulated by 2-fold in fusion-negative RMS at the RNA level
				Proteomic
Entry ID	Entry	Gene names	Gene	Proteomic Normal Muscle		Fusion Negative			Fold Change Fusion Negative/Normal Muscle	Transcriptomic (GSE108022)
				hSkMC 1	hSkMC 2	RD	RMS-MC02	Rh36		Log2(FoldCgange)	p-Value
ACL6A_HUMAN	O96019	ACTL6A BAF53 BAF53A INO80K	ACTL6A	3.74383e-05	5.36688e-05	0.000137023	6.88614e-05	8.00816e-05	2.09252	1.40162	1.20016e-09
A4_HUMAN	P05067	APP A4 AD1	APP	2.69671e-05	0	0.000279669	1.86005e-05	5.1915e-05	8.65709	1.13684	0.00361294
CADM1_HUMAN	Q9BY67	CADM1 IGSF4 IGSF4A NECL2 SYNCAM TSLC1	CADM1	0	0	4.51414e-05	3.30254e-05	9.21755e-05	∞	1.61337	0.000409556
CSKP_HUMAN	O14936	CASK LIN2	CASK	1.11721e-05	0	0.00021066	6.03508e-05	0.000501845	46.1183	1.22364	1.04909e-07
CASP3_HUMAN	P42574	CASP3 CPP32	CASP3	8.2758e-05	0	0.000138245	0.00015171	0.000376383	5.36778	1.09807	1.04836e-05
CD82_HUMAN	P27701	CD82 KAI1 SAR2 ST6 TSPAN27	CD82	0	0	0.000442385	0.000593356	5.01845e-05	∞	1.93564	0.000105944
DNJC9_HUMAN	Q8WXX5	DNAJC9	DNAJC9	0.000117897	0.000168162	0.000663578	0.000431532	0.000326199	3.31239	1.44017	1.32207e-08
EFNA5_HUMAN	P52803	EFNA5 EPLG7 LERK7	EFNA5	0	0	0.000170148	6.22401e-05	0.000202668	∞	3.25143	1.00988e-14
FGFR4_HUMAN	P22455	FGFR4 JTK2 TKF	FGFR4	0	5.7328e-05	0.000427304	1.83891e-05	4.27708e-05	5.68034	5.05077	1.54793e-25
FMR1_HUMAN	Q06787	FMR1	FMR1	3.30441e-05	0	0.000280385	2.27922e-05	0.000657346	19.3786	1.70946	1.50489e-07
FSCN1_HUMAN	Q16658	FSCN1 FAN1 HSN SNL	FSCN1	0.0005345	0.000206381	0.000644599	0.000433135	0.00229936	3.03881	4.51734	1.7558e-46
GAS1_HUMAN	P54826	GAS1	GAS1	0	0.000175169	0.00121979	4.49512e-05	0.000480934	6.64377	1.86531	2.61274e-06
GOLM1_HUMAN	Q8NBJ4	GOLM1 C9orf155 GOLPH2 PSEC0242 UNQ686/PRO1326	GOLM1	7.18842e-05	0	0.00122885	0.000431532	6.69126e-05	16.0192	1.9837	3.54755e-14
HMGB1_HUMAN	P09429	HMGB1 HMG1	HMGB1	0.000387702	0.000353141	0.00065053	0.00122987	0.00207764	3.56174	1.14351	3.61644e-05
IBP2_HUMAN	P18065	IGFBP2 BP2 IBP2	IGFBP2	0	0	6.31979e-05	9.24711e-05	0.000129046	∞	4.72419	2.00072e-22
JUPI2_HUMAN	Q9H910	JPT2 C16orf34 HN1L L11	JPT2	5.86533e-05	0.000126122	0.000221193	0.000485473	0.000150553	3.09284	1.22347	1.57869e-06
LIN7A_HUMAN	O14910	LIN7A MALS1 VELI1	LIN7A	0	0	0.000680593	0.00012448	0.000405336	∞	1.75125	0.00754602
MARE1_HUMAN	Q15691	MAPRE1	MAPRE1	0.00029366	0.000294284	0.000511767	0.000537146	0.000853136	2.15672	1.55725	8.4994e-13
MRP_HUMAN	P49006	MARCKSL1 MLP MRP	MARCKSL1	0.000161887	0.000189182	0.000653792	0.000404561	0.000564575	3.08187	4.62978	5.63772e-49
NCS1_HUMAN	P62166	NCS1 FLUP FREQ	NCS1	0.000160366	0	0.000295695	0.000441339	0.000239517	4.05967	4.06596	1.37088e-31
NECT1_HUMAN	Q15223	NECTIN1 HVEC PRR1 PVRL1	NECTIN1	0	0	0.000594621	2.83902e-05	9.24451e-05	∞	5.47133	1.85356e-26
NRCAM_HUMAN	Q92823	NRCAM KIAA0343	NRCAM	1.63746e-05	0	0.000364555	0.000106286	2.09102e-05	20.0209	4.81178	2.67185e-11
8ODP_HUMAN	P36639	NUDT1 MTH1	NUDT1	7.65044e-05	0	9.61707e-05	0.000140717	9.8187e-05	2.91987	2.18688	2.71449e-10
PCDH7_HUMAN	O60245	PCDH7 BHPCDH	PCDH7	2.03271e-05	0.000152216	0.00070044	0.000343478	5.1915e-05	4.23405	3.20419	8.69572e-07
QSOX2_HUMAN	Q6ZRP7	QSOX2 QSCN6L1 SOXN	QSOX2	6.78661e-05	0	0.000113432	0.000145227	1.93017e-05	2.73048	1.37991	2.46923e-07
SCRIB_HUMAN	Q14160	SCRIB CRIB1 KIAA0147 LAP4 SCRB1 VARTUL	SCRIB	3.8628e-05	5.76556e-05	3.79188e-05	3.69884e-05	0.000455962	3.67573	1.27347	8.06281e-06
SDC2_HUMAN	P34741	SDC2 HSPG1	SDC2	0.000321537	0.000229312	0.00135139	0.000192025	0.000239517	2.1578	1.4553	2.63291e-05
GDN_HUMAN	P07093	SERPINE2 PI7 PN1	SERPINE2	0	0.000200648	0.000560324	7.35565e-05	3.42167e-05	2.2198	1.89947	0.000329539
SPTN2_HUMAN	O15020	SPTBN2 KIAA0302 SCA5	SPTBN2	3.57877e-05	4.65393e-05	3.8403e-05	7.79439e-05	0.00035555	3.82132	5.26749	1.33745e-16
TTYH3_HUMAN	Q9C0H2	TTYH3 KIAA1691	TTYH3	4.04506e-05	6.52353e-05	0.000263582	8.37023e-05	0.000298511	4.07368	4.53326	3.13287e-41

## Sheet: Table S8
	Table S8. List of cell-surface proteins from Table S6 upregulated by 2-fold in fusion-positive RMS at the RNA level
				Proteomic
Entry ID	Entry	Gene names	Gene	Normal Muscle		Fusion Positive		Fold Change Fusion Positive/Normal Muscle	Transcriptomic (GSE108022)
				hSkMC 1	hSkMC 2	RH30	Rh41		Log2(FoldCgange)	p-Value
ARHG2_HUMAN	Q92974	ARHGEF2 KIAA0651 LFP40	ARHGEF2	3.14214e-05	0	0.000109197	0.000144086	8.06082	2.7079	1.15266e-39
ARRB1_HUMAN	P49407	ARRB1 ARR1	ARRB1	0	0	0.000173476	0.000294303	∞	3.24667	1.97676e-15
BCAM_HUMAN	P50895	BCAM LU MSK19	BCAM	0.000197719	0.000432955	0.00178081	0.000275268	3.26012	1.47529	0.000349429
CSKP_HUMAN	O14936	CASK LIN2	CASK	1.11721e-05	0	0.000135889	0.000120758	22.9722	1.39544	1.77776e-09
CD276_HUMAN	Q5ZPR3	CD276 B7H3 PSEC0249 UNQ309/PRO352	CD276	0.000211826	0.000154886	0.000916053	0.000182003	2.99432	1.92103	1.00025e-14
CAD15_HUMAN	P55291	CDH15 CDH14 CDH3	CDH15	0	0.000113368	0.000183222	9.06607e-05	2.41588	2.73881	5.41712e-25
CADH4_HUMAN	P55283	CDH4	CDH4	0	0	5.71141e-05	6.91612e-05	∞	2.94622	8.77879e-05
CXAR_HUMAN	P78310	CXADR CAR	CXADR	0	0	0.000142785	5.76343e-05	∞	1.95656	0.0165036
EFNA5_HUMAN	P52803	EFNA5 EPLG7 LERK7	EFNA5	0	0	0.00021967	0.000133002	∞	2.43553	4.61405e-08
EPHA7_HUMAN	Q15375	EPHA7 EHK3 HEK11	EPHA7	0.000157898	0	0.000331421	0.000319047	4.11955	6.10944	2.41195e-27
EPHB4_HUMAN	P54760	EPHB4 HTK MYK1 TYRO11	EPHB4	4.36382e-05	9.34234e-05	0.000370184	3.20191e-05	2.93447	1.44888	0.00035022
FAS_HUMAN	P49327	FASN FAS	FASN	0.000166993	9.70166e-05	0.000545051	0.000223782	2.91214	1.32358	4.42472e-05
FMR1_HUMAN	Q06787	FMR1	FMR1	3.30441e-05	0	0.000258381	0.000405876	20.1021	2.11795	3.22501e-15
FSCN1_HUMAN	Q16658	FSCN1 FAN1 HSN SNL	FSCN1	0.0005345	0.000206381	0.00102321	0.00125748	3.07834	5.2126	3.09526e-62
GAS1_HUMAN	P54826	GAS1	GAS1	0	0.000175169	0.000555135	0.000288172	4.81425	2.2385	6.46797e-11
HMGB1_HUMAN	P09429	HMGB1 HMG1	HMGB1	0.000387702	0.000353141	0.00179374	0.00202873	5.15962	1.08187	1.00653e-07
IL4RA_HUMAN	P24394	IL4R IL4RA 582J2.1	IL4R	0	0	9.51902e-05	2.56153e-05	∞	2.61664	6.46309e-12
ITA4_HUMAN	P13612	ITGA4 CD49D	ITGA4	0.000315054	0.000921236	0.00219761	0.000471098	2.15864	2.61277	9.83485e-09
JAM3_HUMAN	Q9BX67	JAM3 UNQ859/PRO1868	JAM3	0.000395502	0.00144139	0.00448725	0.000823348	2.89108	2.88196	8.09527e-16
JUPI2_HUMAN	Q9H910	JPT2 C16orf34 HN1L L11	JPT2	5.86533e-05	0.000126122	0.000428356	0.000115269	2.94209	1.60782	7.21524e-22
IMA1_HUMAN	P52292	KPNA2 RCH1 SRP1	KPNA2	4.04506e-05	0	0.000175719	0.000119243	7.29192	3.02018	2.35408e-31
L1CAM_HUMAN	P32004	L1CAM CAML1 MIC5	L1CAM	0	0.000396382	0.00196101	0.000263471	5.61196	3.51922	5.65955e-05
MARE1_HUMAN	Q15691	MAPRE1	MAPRE1	0.00029366	0.000294284	0.00115506	0.000806881	3.33695	1.69973	1.12685e-12
MRP_HUMAN	P49006	MARCKSL1 MLP MRP	MARCKSL1	0.000161887	0.000189182	0.000724017	0.000230537	2.71899	4.8624	7.07449e-50
MEG10_HUMAN	Q96KG7	MEGF10 KIAA1780	MEGF10	0	9.30405e-05	0.000521622	0.000151172	7.23119	4.34891	1.88489e-56
MET_HUMAN	P08581	MET	MET	0	5.6593e-05	0.0003242	3.69451e-05	6.38144	1.30623	0.00355049
NECT1_HUMAN	Q15223	NECTIN1 HVEC PRR1 PVRL1	NECTIN1	0	0	0.000869404	0.000606677	∞	5.93236	2.99593e-144
NRCAM_HUMAN	Q92823	NRCAM KIAA0343	NRCAM	1.63746e-05	0	0.00184284	4.80286e-05	115.476	7.31811	4.71274e-57
NRP2_HUMAN	O60462	NRP2 VEGF165R2	NRP2	0	2.40232e-05	0.000339917	3.29339e-05	15.5205	1.55255	0.00947946
PCDH7_HUMAN	O60245	PCDH7 BHPCDH	PCDH7	2.03271e-05	0.000152216	0.0012326	6.95587e-05	7.54689	3.51231	7.09857e-15
KAPCA_HUMAN	P17612	PRKACA PKACA	PRKACA	5.73667e-05	0	0.000149147	5.62286e-05	3.58004	1.30928	5.92407e-06
PTPRD_HUMAN	P23468	PTPRD	PTPRD	3.29015e-05	0	0.000146106	3.2168e-05	5.41842	5.5161	1.54655e-66
QSOX2_HUMAN	Q6ZRP7	QSOX2 QSCN6L1 SOXN	QSOX2	6.78661e-05	0	0.000135967	2.95561e-05	2.43897	3.10972	4.23133e-16
RCC2_HUMAN	Q9P258	RCC2 KIAA1470 TD60	RCC2	6.83433e-05	0.000270261	0.000545984	0.000576343	3.31457	3.13904	9.05236e-57
SDC2_HUMAN	P34741	SDC2 HSPG1	SDC2	0.000321537	0.000229312	0.000908634	0.000471554	2.50556	1.1136	2.78566e-06
SDK2_HUMAN	Q58EX2	SDK2 KIAA1514	SDK2	0	0	0.000136458	5.78755e-05	∞	5.21416	5.63734e-39
TTYH3_HUMAN	Q9C0H2	TTYH3 KIAA1691	TTYH3	4.04506e-05	6.52353e-05	0.000488796	7.94956e-05	5.37718	4.09238	5.98071e-59
UBE2C_HUMAN	O00762	UBE2C UBCH10	UBE2C	0.000117897	0	0.000316095	0.000115269	3.65882	6.11675	9.49546e-56

## Sheet: Table S9
Table S9. Normal tissue median RNA expression of RMS-enriched cell-surface proteins
Entry ID	Entry	Gene names	Gene	Adrenal Gland	Artery Aorta	Artery Coronary	Artery Tibial	Brain Cerebellum	Brain Cortex	Breast	Colon Sigmoid	Colon Transverse	GE junction	Esophagus Mucosa	Esophagus Muscle	Heart Atrial	Heart Ventricle	Liver	Lung	Minor Salivary	Muscle Skeletal	Nerve Tibial	Ovary	Pancreas	Pituitary	Prostate	Skin Unexpo	Skin SunExpo	Small Intestine	Spleen	Stomach	Testis	Thyroid	Uterus	Vagina	Average	SD
LIN7A_HUMAN	O14910	LIN7A MALS1 VELI1	LIN7A	1.11729	1.30134	2.09943	4.31691	26.7228	11.7127	5.54044	2.56685	2.11404	4.16986	0.846745	3.65533	8.22491	8.69388	13.2691	7.83536	1.28343	1.31039	7.06162	4.34694	0.752623	8.81524	2.25012	0.702222	1.06437	3.09513	5.81589	1.3566	6.9644	5.61778	10.4107	4.78991	5.30701	5.21679
CSKP_HUMAN	O14936	CASK LIN2	CASK	7.31065	9.06307	8.69388	8.22491	8.81524	8.81524	6.19026	5.31474	8.9383	5.6962	7.6211	5.6962	4.82323	3.65533	4.95883	6.82108	10.3388	3.13834	5.6962	7.51618	7.88986	5.73582	5.89708	6.72717	6.49802	9.91766	5.27803	9.12611	1.8025	4.72397	6.45313	7.46426	6.71379	2.00419
SPTN2_HUMAN	O15020	SPTBN2 KIAA0302 SCA5	SPTBN2	19.9733	0.423373	0.460094	0.267943	129.787	115.36	3.36359	1.02811	1.41421	1.00696	56.493	1.7411	2.21914	0.946058	30.2738	1.59107	16.4498	0.450625	2.05623	1.29235	24.59	25.2813	12.9063	101.125	111.43	1.48452	1.37554	4	97.0059	0.450625	1.23114	22.0087	24.6715	39.9416
PCDH7_HUMAN	O60245	PCDH7 BHPCDH	PCDH7	0.582367	50.9143	19.2929	19.0273	0.397768	9.38268	1.43396	16.5642	6.9644	23.2636	4.37717	22.0087	0.795536	10.0561	0.257028	1.64718	0.535887	0.120742	1.50525	0.946058	0.273573	0.111878	5.61778	5.57897	5.09824	2.63902	6.27667	6.63456	0.668964	2.01391	8.39773	5.06303	7.45148	10.4661
NRP2_HUMAN	O60462	NRP2 VEGF165R2	NRP2	19.2929	9.98664	17.2677	5.93809	0.858565	4.16986	10.1965	71.0124	24.9333	69.551	6.72717	70.5219	5.85634	2.82843	2.41162	16.7955	2.94854	1.51572	39.3966	34.5353	1.16473	8.81524	8.28212	2.9897	3.94493	5.54044	4.19887	7.4127	1.15669	9.98664	37.014	12.5533	16.2439	20.4737
PLXA2_HUMAN	O75051	PLXNA2 KIAA0463 OCT PLXN2 UNQ209/PRO235	PLXNA2	1.76541	15.1369	19.0273	14.9285	29.8571	25.4572	8.45614	7.11074	12.996	13.6422	28.0514	13.2691	13.2691	15.2422	5.02805	29.0406	6.32033	11.9588	7.3615	21.259	48.8403	5.61778	8.57419	16.4498	17.0299	9.51366	2.62079	14.6213	1.84038	13.5479	11.0809	12.4666	14.4182	9.73504
ACL6A_HUMAN	O96019	ACTL6A BAF53 BAF53A INO80K	ACTL6A	26.1729	22.9433	23.4254	23.7524	5.77572	7.31065	28.6408	28.0514	32	23.1029	35.261	24.0839	20.393	21.4068	22.7848	23.5883	31.3414	14.723	27.2843	30.91	30.4844	19.5622	20.393	32	31.125	29.446	25.9921	28.6408	66.257	23.9176	29.0406	29.6508	26.2332	9.82825
A4_HUMAN	P05067	APP A4 AD1	APP	398.932	401.707	259.574	288.015	196.72	388.023	304.437	237.207	290.018	280.139	118.603	298.172	340.144	282.088	157.586	294.067	328.557	64	247.28	222.861	200.854	176.069	160.898	227.544	238.856	200.854	107.635	184.823	107.635	388.023	212.306	163.144	242.712	88.8922
GDN_HUMAN	P07093	SERPINE2 PI7 PN1	SERPINE2	9.98664	32.8996	30.6965	21.8566	50.5626	121.095	10.0561	15.1369	10.7034	22.6274	29.6508	31.3414	85.0359	30.6965	5.65685	10.1261	11.1579	2.92817	35.261	88.0347	4.25748	6.86852	12.6407	7.56846	7.06162	19.4271	15.3482	4.37717	40.2244	22.9433	6.19026	25.8125	25.8822	26.9123
MET_HUMAN	P08581	MET	MET	0.466516	5.35171	5.35171	3.31728	0.184284	5.02805	14.9285	5.16941	7.72749	3.86375	4.78991	4.25748	5.57897	6.54322	29.446	9.18959	14.9285	13.1775	15.8895	0.768438	10.3388	6.40856	6.9644	9.06307	8.28212	4.95883	4.28709	7.4127	0.469761	13.2691	4.59479	6.82108	7.46338	5.7941
HMGB1_HUMAN	P09429	HMGB1 HMG1	HMGB1	50.9143	79.8932	80.4489	91.7731	64.8934	64.8934	81.5719	80.4489	72.0037	74.028	68.5935	70.5219	60.9688	56.1028	68.5935	73.5167	58.4852	69.0706	85.0359	76.1093	49.5221	52.7098	72.0037	60.9688	53.4456	77.1717	74.5429	61.8199	42.8137	73.0089	94.3532	84.4485	69.5211	12.4545
ITA4_HUMAN	P13612	ITGA4 CD49D	ITGA4	0.920188	1.85318	2.18859	1.21419	2.63902	0.61132	2	2.01391	3.70635	1.23114	0.939523	1.26576	1.05702	0.650671	1.71713	9.25351	2.44528	0.241484	2.28153	0.566442	0.846745	0.558644	1.31951	0.650671	0.82932	9.64646	21.8566	1.91853	0.358489	1.41421	1.11729	1.89212	2.53765	4.1136
KAPCA_HUMAN	P17612	PRKACA PKACA	PRKACA	140.07	88.0347	75.0614	88.647	83.2859	106.891	60.9688	67.1819	51.2685	75.5835	46.2057	76.1093	222.861	256	93.7015	56.1028	46.8507	276.282	46.5271	106.891	41.6429	89.8845	49.18	43.1115	47.1766	41.9326	85.6274	43.4113	78.7932	48.1679	60.1295	50.5626	85.7545	59.471
IBP2_HUMAN	P18065	IGFBP2 BP2 IBP2	IGFBP2	45.5696	1144.1	537.455	274.374	1.55833	22.9433	80.4489	24.2515	62.6829	141.044	135.298	156.498	113.772	121.095	404.501	60.9688	52.3457	16.7955	57.68	249	250.732	60.9688	212.306	20.5348	26.1729	42.8137	310.834	512	68.5935	51.2685	108.383	90.5097	170.547	225.943
FGFR4_HUMAN	P22455	FGFR4 JTK2 TKF	FGFR4	16.5642	0.381565	0.747425	0.273573	7.56846	2.05623	1.81504	3.78423	28.0514	3.36359	4.11246	3.20428	2.90795	1.89212	118.603	96.3358	0.795536	3.94493	3.70635	32.4467	43.7133	3.03143	5.06303	1.97247	2.25012	30.6965	31.125	13.0864	10.7034	1.25701	3.50642	3.73213	15.0841	26.9528
PTPRD_HUMAN	P23468	PTPRD	PTPRD	0.697372	11.2356	10.1261	3.16017	55.7152	28.2465	1.15669	1.05702	4.53154	2.73208	0.790041	2.02792	2.49666	3.38698	5.20537	6.58873	0.697372	0.882703	0.882703	13.6422	1.71713	6.54322	2.34567	0.659754	0.817902	5.57897	0.562529	1.19748	2.92817	4.34694	3.29436	3.97237	5.91323	10.585
IL4RA_HUMAN	P24394	IL4R IL4RA 582J2.1	IL4R	44.3235	38.3193	51.6251	44.0173	6.02099	10.6295	39.9466	106.891	83.8652	94.3532	82.1393	96.3358	39.1245	19.2929	120.259	141.044	23.2636	7.78124	18.507	11.1579	27.8576	14.8254	53.4456	25.6342	26.1729	60.9688	103.25	47.5048	22.0087	26.5382	49.5221	56.1028	49.7728	35.8491
CD82_HUMAN	P27701	CD82 KAI1 SAR2 ST6 TSPAN27	CD82	8.9383	25.6342	25.9921	48.1679	10.7034	17.2677	28.84	14.8254	15.7797	16.7955	133.436	18.3792	11.6318	26.5382	30.6965	89.8845	66.257	14.5203	27.6652	11.6318	26.9087	7.4127	26.5382	78.7932	72.0037	53.8174	45.2548	37.2715	4.25748	11.7942	6.32033	72.0037	33.9363	29.4966
L1CAM_HUMAN	P32004	L1CAM CAML1 MIC5	L1CAM	1.47427	1.72907	7.26015	2.39496	222.861	105.42	2.36199	62.2499	25.2813	41.6429	4.75683	43.7133	17.2677	6.1475	0.790041	0.726986	5.9794	0.823591	84.4485	0.812252	2.25012	23.9176	9.64646	7.56846	5.6962	9.84916	0.895025	7.46426	0.768438	3.36359	2.63902	9.38268	22.5494	44.4631
SDC2_HUMAN	P34741	SDC2 HSPG1	SDC2	8.51496	139.102	117.784	159.786	22.6274	30.0647	58.892	74.5429	44.0173	62.6829	12.4666	47.1766	65.7993	39.1245	158.683	44.3235	22.4711	11.7127	63.5579	124.5	50.5626	70.5219	41.0696	18.507	20.2521	31.125	12.6407	32.6724	12.2101	181.019	68.1197	56.8859	59.4817	47.669
8ODP_HUMAN	P36639	NUDT1 MTH1	NUDT1	3.75809	6.86852	7.21	6.77396	4.75683	5.93809	7.01285	8.45614	7.83536	6.6807	12.4666	6.82108	8.69388	8.87656	2.82843	6.23332	5.54044	6.9163	7.88986	4.25748	4.22807	2.54912	5.65685	12.042	12.1257	8.1681	14.42	5.54044	42.8137	3.83706	5.6962	8.05564	8.15461	6.90201
CASP3_HUMAN	P42574	CASP3 CPP32	CASP3	18.3792	17.1484	16.4498	12.042	26.1729	13.6422	15.3482	14.6213	28.2465	14.3204	36.7583	14.0257	13.5479	19.0273	31.3414	18.8959	21.1121	17.1484	11.4716	10.7034	16.4498	14.723	14.3204	15.6707	13.8326	26.9087	30.2738	22.0087	13.737	12.042	12.8171	19.5622	18.2109	6.50621
MRP_HUMAN	P49006	MARCKSL1 MLP MRP	MARCKSL1	84.4485	15.0324	58.0812	10.3388	184.823	337.794	86.8227	18.6357	128	19.8353	18.8959	20.2521	77.7085	45.5696	50.9143	64	121.095	11.4716	128	522.758	36.7583	32	106.891	38.5859	38.5859	103.968	104.691	120.259	286.026	173.645	76.1093	44.6318	98.9572	108.239
FAS_HUMAN	P49327	FASN FAS	FASN	44.0173	24.9333	41.0696	26.5382	141.044	110.661	268.727	26.3549	36.7583	33.8246	111.43	32	23.2636	16	206.5	67.1819	66.257	20.8215	58.892	22.6274	28.2465	91.7731	91.1392	127.116	115.36	31.5594	16.4498	91.7731	28.2465	30.6965	24.761	54.9482	65.9679	58.3342
ARRB1_HUMAN	P49407	ARRB1 ARR1	ARRB1	8.05564	6.32033	11.4716	4.59479	33.3589	53.4456	28.84	31.125	32.6724	47.5048	10.0561	43.1115	15.7797	18.0009	8.1681	46.2057	15.6707	6.02099	13.3614	11.7942	22.0087	3.50642	21.1121	15.1369	13.737	26.9087	37.5307	42.8137	3.38698	10.1261	10.7779	13.6422	20.8202	14.5427
BCAM_HUMAN	P50895	BCAM LU MSK19	BCAM	33.1285	144.007	268.727	404.501	14.5203	32	173.645	40.7859	40.5042	72.0037	42.8137	65.3448	128	166.572	58.0812	152.219	106.153	38.5859	121.938	54.9482	82.7106	54.9482	212.306	67.6492	79.3413	41.6429	51.9842	59.3016	36.2523	324.034	126.238	94.3532	105.914	89.9663
IMA1_HUMAN	P52292	KPNA2 RCH1 SRP1	KPNA2	18.0009	15.6707	20.8215	12.3805	12.5533	30.6965	16.7955	13.737	22.6274	14.2215	45.8866	15.2422	21.8566	26.7228	16.3362	23.4254	17.6305	14.42	13.6422	5.65685	10.8528	19.5622	9.57983	17.2677	14.723	25.1067	32.4467	19.4271	198.088	13.737	13.6422	19.6983	24.1393	32.6499
EFNA5_HUMAN	P52803	EFNA5 EPLG7 LERK7	EFNA5	0.790041	9.98664	6.19026	7.83536	3.16017	12.2101	6.6807	6.9163	6.40856	2.9897	11.0809	2.18859	9.06307	11.6318	0.632878	3.83706	15.6707	0.650671	3.97237	4.11246	0.812252	14.1232	7.3615	20.1122	19.5622	2.42839	5.89708	4.78991	1.89212	3.65533	0.650671	11.9588	6.85163	5.39923
EPHB4_HUMAN	P54760	EPHB4 HTK MYK1 TYRO11	EPHB4	81.0084	9.84916	19.9733	7.88986	2.23457	5.85634	60.9688	29.6508	38.3193	29.8571	42.2243	34.0598	31.125	39.9466	53.4456	55.3304	46.8507	7.4127	25.8125	60.5477	44.0173	11.2356	54.9482	61.8199	58.892	30.2738	79.8932	39.9466	26.3549	32.4467	99.7331	52.7098	39.8323	23.4813
GAS1_HUMAN	P54826	GAS1	GAS1	10.0561	29.446	31.5594	22.0087	3.73213	4.31691	63.5579	47.5048	20.1122	48.5029	7.06162	38.5859	44.9422	18.7654	3.01049	11.6318	21.8566	15.0324	24.761	72.0037	19.4271	10.7779	33.8246	34.7755	35.5062	9.78112	4.85678	11.6318	3.34035	22.3159	131.599	29.2426	27.6727	25.7974
CAD15_HUMAN	P55291	CDH15 CDH14 CDH3	CDH15	0.25349	0.15822	0.336808	0.0877778	121.095	0.0973956	0.098073	0.104386	0.0934281	0.244855	0.0529216	0.246558	0.360982	0.143587	0.876606	0.554785	0.260616	64.8934	5.81589	0.264255	0.258816	0.157127	0.169576	0.114229	0.133972	0.10083	1.65864	0.208772	1.15669	0.0708052	0.0836205	0.285191	6.26368	23.8677
NCS1_HUMAN	P62166	NCS1 FLUP FREQ	NCS1	31.125	59.3016	41.6429	90.5097	139.102	572.051	5.85634	181.019	65.7993	112.986	22.7848	110.661	16.6795	6.1475	2.9897	9.84916	8.11168	2.94854	10.0561	11.3137	6.32033	17.3878	45.8866	20.6776	23.1029	9.06307	1.21419	11.0043	4.19887	36.5044	60.5477	21.1121	54.9361	104.247
CXAR_HUMAN	P78310	CXADR CAR	CXADR	3.18215	0.0877778	0.167241	0.046714	1.7411	5.9794	2.18859	0.742262	7.31065	0.243164	18.3792	0.200267	6.45313	9.06307	20.1122	4.89056	17.2677	0.0547879	0.312083	0.486327	12.7286	8.63383	11.5514	32.8996	30.0647	6.82108	0.76313	21.7057	9.64646	8.05564	2.37841	16.4498	8.14396	8.94911
FMR1_HUMAN	Q06787	FMR1	FMR1	12.8171	16.6795	17.3878	21.8566	25.8125	25.8125	17.3878	18.3792	18.1261	17.1484	15.7797	16.5642	18.3792	15.1369	30.0647	19.5622	15.1369	7.67411	22.3159	23.9176	13.2691	16.3362	15.2422	16.9123	16.2234	20.2521	22.0087	14.0257	12.7286	24.2515	21.259	17.6305	18.3149	4.57012
SCRIB_HUMAN	Q14160	SCRIB CRIB1 KIAA0147 LAP4 SCRB1 VARTUL	SCRIB	26.5382	29.0406	29.2426	28.2465	39.3966	62.6829	33.5909	38.8542	45.5696	33.1285	116.162	36.2523	27.8576	37.7918	38.0546	33.3589	47.8352	62.2499	53.0765	33.1285	45.5696	38.8542	43.1115	77.7085	74.028	41.9326	37.2715	40.7859	53.0765	37.014	37.2715	66.257	45.1543	18.5269
NECT1_HUMAN	Q15223	NECTIN1 HVEC PRR1 PVRL1	NECTIN1	3.53081	3.68075	3.83706	3.97237	25.4572	54.1917	7.4127	3.29436	10.7779	3.63008	192.672	3.09513	6.10504	11.3137	6.06287	4.31691	16.9123	1.18921	9.25351	2.9897	23.4254	11.8762	18.507	121.938	120.259	8.22491	4.85678	6.49802	2.12874	2.75108	4.11246	49.8665	23.3793	42.915
EPHA7_HUMAN	Q15375	EPHA7 EHK3 HEK11	EPHA7	0.0660636	0.25349	0.381565	0.417544	9.51366	2.90795	0.406126	31.125	13.9288	35.0174	0.194791	56.8859	5.16941	1.64718	0.0813339	0.267943	2.9897	0.147624	0.752623	0.840896	0.142595	1.75321	6.86852	0.320856	0.314253	1	4.11246	1.91853	1.24833	0.123279	0.343885	2.54912	5.74031	12.4306
MARE1_HUMAN	Q15691	MAPRE1	MAPRE1	62.6829	105.42	104.691	115.36	19.1597	50.2134	79.8932	120.259	88.647	107.635	70.5219	117.784	91.7731	76.6386	24.59	91.7731	53.0765	48.8403	73.0089	61.3929	58.4852	44.0173	66.7178	56.493	53.8174	64	71.0124	67.6492	86.8227	74.5429	85.6274	67.6492	73.7561	25.0777
FSCN1_HUMAN	Q16658	FSCN1 FAN1 HSN SNL	FSCN1	61.8199	28.2465	29.446	11.7942	24.761	152.219	37.2715	16.4498	16.1113	15.1369	92.4115	14.723	25.4572	18.6357	11.1579	41.6429	30.2738	4.28709	91.7731	70.0348	8.45614	34.5353	16.3362	69.0706	80.4489	17.2677	85.0359	13.5479	79.3413	41.0696	23.4254	60.9688	41.3486	33.8184
SDK2_HUMAN	Q58EX2	SDK2 KIAA1514	SDK2	0.243164	2.32947	0.737135	0.435275	0.48971	3.22657	0.737135	1.02811	0.876606	0.547147	1.04972	0.582367	1.69349	0.986233	0.176777	2.08493	0.779165	0.0785633	3.605	0.373712	0.0973956	2.41162	2.71321	0.795536	0.920188	1.15669	3.55537	0.650671	16.6795	1.15669	0.213159	1.43396	1.68263	2.91303
CD276_HUMAN	Q5ZPR3	CD276 B7H3 PSEC0249 UNQ309/PRO352	CD276	38.3193	36.7583	27.6652	33.8246	6.77396	13.1775	27.4741	21.4068	19.6983	19.5622	9.38268	18.507	31.779	25.8125	28.6408	23.1029	28.6408	6.40856	19.5622	23.1029	20.1122	14.723	30.91	22.0087	29.0406	13.3614	12.2101	19.4271	11.8762	17.1484	24.4201	25.4572	21.8842	8.29783
QSOX2_HUMAN	Q6ZRP7	QSOX2 QSCN6L1 SOXN	QSOX2	13.0864	10.4107	11.1579	7.78124	58.892	14.723	11.3924	11.0043	12.9063	11.6318	9.51366	11.3924	13.2691	14.723	15.2422	14.3204	12.042	8.39773	13.0864	16.9123	34.2968	65.3448	12.6407	18.507	14.9285	18.3792	27.6652	13.9288	24.2515	22.1618	15.455	11.2356	17.8338	12.9033
GOLM1_HUMAN	Q8NBJ4	GOLM1 C9orf155 GOLPH2 PSEC0242 UNQ686/PRO1326	GOLM1	207.937	11.3137	17.1484	11.1579	79.8932	101.829	29.0406	22.7848	124.5	14.723	9.38268	13.3614	18.6357	12.8171	18.507	16.6795	166.572	9.44794	20.1122	38.0546	54.1917	54.1917	53.4456	13.5479	16.2234	38.8542	35.5062	68.5935	24.761	37.2715	27.8576	21.4068	43.4296	46.9162
DNJC9_HUMAN	Q8WXX5	DNAJC9	DNAJC9	11.3137	10.0561	10.0561	9.31787	25.4572	16.3362	10.0561	10.4831	11.3924	9.71356	15.455	9.44794	9.51366	9.64646	8.33973	9.64646	11.0043	9.57983	9.25351	12.4666	8.87656	11.3924	10.4831	12.3805	12.6407	12.1257	13.0864	10.2674	17.3878	8.63383	11.3137	12.6407	11.5551	3.3244
NRCAM_HUMAN	Q92823	NRCAM KIAA0343	NRCAM	52.7098	0.757858	0.752623	0.243164	43.7133	105.42	1.45397	1.12506	1.01396	1.15669	0.939523	1.36604	0.732043	0.238159	0.203063	4.11246	1.01396	0.188156	9.91766	0.986233	27.0958	39.1245	0.959264	0.76313	0.835088	1.33793	9.51366	1.44393	2.21914	2.41162	0.348686	0.632878	9.83528	22.1486
ARHG2_HUMAN	Q92974	ARHGEF2 KIAA0651 LFP40	ARHGEF2	8.69388	56.8859	47.8352	51.6251	63.5579	55.7152	34.2968	20.9663	38.8542	35.0174	18.7654	31.779	32.2226	33.3589	8.51496	76.1093	22.9433	11.7942	49.18	21.4068	11.3924	12.042	22.4711	11.0043	14.42	38.8542	53.4456	29.0406	34.5353	40.2244	34.7755	25.9921	32.7412	17.4054
JAM3_HUMAN	Q9BX67	JAM3 UNQ859/PRO1868	JAM3	25.9921	106.891	95.6704	121.095	18.8959	35.7532	30.91	79.8932	40.2244	76.6386	11.9588	78.249	51.2685	40.5042	4.72397	46.2057	22.1618	8.22491	79.8932	62.6829	8	48.5029	43.1115	16.7955	19.9733	29.6508	19.9733	22.0087	58.892	24.59	62.6829	32	44.5006	30.2258
CADM1_HUMAN	Q9BY67	CADM1 IGSF4 IGSF4A NECL2 SYNCAM TSLC1	CADM1	7.56846	1.30134	1.81504	1.41421	42.2243	21.7057	3.5801	6.9644	3.31728	4.50023	2.77022	4.11246	8	9.00047	11.0043	19.2929	10.1261	2.05623	12.8171	3.65533	5.93809	18.6357	4.62675	4.56305	4.14106	2.80889	1.61328	3.27161	21.4068	20.2521	2.54912	2.78949	8.43194	8.85157
TTYH3_HUMAN	Q9C0H2	TTYH3 KIAA1691	TTYH3	35.7532	30.6965	26.1729	13.0864	116.162	77.7085	20.5348	17.2677	21.1121	15.8895	9.06307	16.1113	17.1484	14.3204	39.3966	36.7583	35.261	3.97237	12.2101	18.0009	11.3924	18.7654	28.443	14.2215	15.455	39.6706	53.4456	16.6795	22.9433	28.6408	22.0087	14.723	26.9692	21.7886
JUPI2_HUMAN	Q9H910	JPT2 C16orf34 HN1L L11	HN1L	24.59	30.0647	21.259	21.259	21.4068	7.72749	26.9087	27.0958	33.8246	27.2843	64.8934	28.6408	20.8215	28.0514	56.8859	27.0958	37.7918	19.8353	21.7057	24.9333	42.8137	23.7524	58.0812	36.2523	33.8246	26.1729	18.6357	37.2715	26.5382	30.2738	21.8566	38.5859	30.1917	12.0246
RCC2_HUMAN	Q9P258	RCC2 KIAA1470 TD60	RCC2	27.2843	18.3792	23.4254	14.0257	29.2426	27.4741	38.3193	25.2813	40.5042	18.2522	100.427	18.3792	18.8959	19.0273	23.2636	43.1115	63.1189	10.7779	26.5382	32.8996	34.5353	16.9123	36.7583	89.2636	81.5719	48.1679	61.8199	29.446	41.0696	31.125	25.6342	53.8174	36.5234	21.9464

[truncated: 3 more sheets: Table S10, Table S11, Table S12]
